# Supplementary material
Source: publisher figshare collection journal article supplement (https://acs.figshare.com/ndownloader/files/25756989)
Supplement: Supplementary file 1 [file 25756989]

## Sheet: Proteins
Table S6_Multireport of proteins identified in the ileum section
Checked	Protein FDR Confidence: Combined	Master	Accession	Description	tBlastn results	Exp. q-value: Combined	Contaminant	Sum PEP Score	Coverage [%]	# Peptides	# PSMs	# Unique Peptides	# AAs	MW [kDa]	calc. pI	Score Sequest HT: A Sequest HT	Score Sequest HT: B Sequest HT	Score Sequest HT: C Sequest HT	Score Sequest HT: D Sequest HT	Score Sequest HT: E Sequest HT	Score Sequest HT: F Sequest HT	Score Sequest HT: G Sequest HT	Score Sequest HT: H Sequest HT	Score Sequest HT: I Sequest HT	Score Sequest HT: J Sequest HT	Score Sequest HT: K Sequest HT	Score Sequest HT: L Sequest HT	Score Sequest HT: M Sequest HT	Score Sequest HT: N Sequest HT	Score Sequest HT: O Sequest HT	Score Sequest HT: P Sequest HT	Score Sequest HT: Q Sequest HT	Score Sequest HT: R Sequest HT	Score Sequest HT: S Sequest HT	Score Sequest HT: T Sequest HT	# Peptides (by Search Engine): A Sequest HT	# Peptides (by Search Engine): B Sequest HT	# Peptides (by Search Engine): C Sequest HT	# Peptides (by Search Engine): D Sequest HT	# Peptides (by Search Engine): E Sequest HT	# Peptides (by Search Engine): F Sequest HT	# Peptides (by Search Engine): G Sequest HT	# Peptides (by Search Engine): H Sequest HT	# Peptides (by Search Engine): I Sequest HT	# Peptides (by Search Engine): J Sequest HT	# Peptides (by Search Engine): K Sequest HT	# Peptides (by Search Engine): L Sequest HT	# Peptides (by Search Engine): M Sequest HT	# Peptides (by Search Engine): N Sequest HT
FALSE	High	Master Protein	A0A088AS00	1,2-dihydroxy-3-keto-5-methylthiopentene dioxygenase OS=Apis mellifera OX=7460 GN=LOC551839 PE=3 SV=1		0	FALSE	12.282	16	2	4	2	185	22.4	6.23	7.31															8.06					2
FALSE	High	Master Protein	A0A088A5K3	1,4,5-trisphosphate receptor OS=Apis mellifera OX=7460 PE=4 SV=1		0	FALSE	15.105	1	3	3	3	2812	318.3	6.02		0					3.29							3.26								1					1							1
FALSE	High	Master Protein	A0A093VBW3	10 kDa chaperonin OS=Pectobacterium carotovorum subsp. carotovorum OX=555 GN=groES PE=3 SV=1		0	FALSE	9.602	24	2	4	2	97	10.4	5.5			8.15																				2
FALSE	High	Master Protein	A0A087ZYB7	10-formyltetrahydrofolate dehydrogenase OS=Apis mellifera OX=7460 PE=3 SV=1		0	FALSE	435.546	61	46	403	45	919	102.2	6.44	252.24			10.29	35.33	62.56		34.07	12.62	19.6	28.41	19.54		213.66	1.65	227.07		63.05	76.56	26.45	38			5	15	19		14	5	10	11	11		30
FALSE	High	Master Protein	A0A087ZUP0	14_3_3 domain-containing protein OS=Apis mellifera OX=7460 GN=14-3-3epsilon PE=3 SV=1		0	FALSE	79.237	37	11	101	9	256	29.1	4.89	16.62	5.93	0	10.58	7.7	10.51	12.46	8.2	14.16	7.84	0	8.33	4.03	33.11	0	4.04	4.47	13.14	7.61	10.99	5	4	1	4	3	3	4	3	5	2	2	4	2	7
FALSE	High	Master Protein	V5T877	2,3-bisphosphoglycerate-dependent phosphoglycerate mutase OS=Lactobacillus mellifer OX=1218492 GN=gpmA PE=3 SV=1		0.009	FALSE	2.913	4	1	1	1	240	27.3	5.4			2.58																				1
FALSE	High	Master Protein	A0A088A1W8	26S proteasome non-ATPase regulatory subunit 2 OS=Apis mellifera OX=7460 GN=Psmd2 PE=3 SV=1		0	FALSE	222.598	47	27	187	27	892	98.6	5.52	98.35	6.18		7.1	2.78	17.12	34.32	3.8	2.08		2.6	8.56	4.38	70.69		75.19	31.43	18.82	46.02	4.66	21	5		3	2	8	14	4	2		3	4	3	12
FALSE	High	Master Protein	A0A088AQJ5	2-methoxy-6-polyprenyl-1,4-benzoquinol methylase, mitochondrial OS=Apis mellifera OX=7460 GN=coq5 PE=3 SV=1		0	FALSE	13.1	12	2	5	2	275	31.9	6.95						2.58	5.78	3.15									3.49									1	2	1
FALSE	High	Master Protein	A0A088A189	2-oxoacid_dh domain-containing protein OS=Apis mellifera OX=7460 PE=4 SV=1		0	FALSE	130.593	50	13	348	13	311	33.8	9.45	102.73	25.89	32.74	31.51	82.66	67.7	39.08	66.4	38.98	38.41	13.31	9.42	9.91	48.77	8.92	74.31	28.3	96.1	55.01	48.8	11	7	10	9	9	9	8	8	6	9	4	3	4	9
FALSE	High	Master Protein	A0A093T1F2	30S ribosomal protein S1 OS=Pectobacterium carotovorum subsp. carotovorum OX=555 GN=rpsA PE=3 SV=1		0	FALSE	8.544	5	2	4	2	557	61.2	5.02			4.57																	0			2
FALSE	High	Master Protein	A0A086FJL8	30S ribosomal protein S10 OS=Serratia marcescens OX=615 GN=rpsJ PE=3 SV=1		0	FALSE	6.59	14	1	1	1	103	11.8	9.86			2.51																				1
FALSE	High	Master Protein	A0A1S6LRK7	30S ribosomal protein S14 OS=Serratia marcescens OX=615 GN=rpsN PE=3 SV=1		0.006	FALSE	3.39	19	1	1	1	101	11.5	11.02			2.08																				1
FALSE	High	Master Protein	A0A0P0QIA0	30S ribosomal protein S2 OS=Serratia marcescens OX=615 GN=rpsB PE=3 SV=1		0	FALSE	5.774	4	1	3	1	241	26.6	8.13			3.39					0															1					1
FALSE	High	Master Protein	A0A093URE1	30S ribosomal protein S20 OS=Pectobacterium carotovorum subsp. carotovorum OX=555 GN=rpsT PE=3 SV=1		0.003	FALSE	4.072	11	1	1	1	87	9.8	11.56			2.09																				1
FALSE	High	Master Protein	A0A093S414	30S ribosomal protein S3 OS=Pectobacterium carotovorum subsp. carotovorum OX=555 GN=rpsC PE=3 SV=1		0.002	FALSE	4.331	12	2	5	2	233	26.1	10.2			0						0							1.72			0	0			1						1
FALSE	High	Master Protein	A0A093SE37	30S ribosomal protein S7 OS=Pectobacterium carotovorum subsp. carotovorum OX=555 GN=rpsG PE=3 SV=1		0	FALSE	7.41	11	1	1	1	156	17.6	10.3																				2.96
FALSE	High	Master Protein	A0A093SSI8	30S ribosomal protein S9 OS=Pectobacterium carotovorum subsp. carotovorum OX=555 GN=rpsI PE=3 SV=1		0	FALSE	6.761	17	2	2	2	130	14.8	11.09			3.98																				2
FALSE	High	Master Protein	A0A087ZZQ9	3-hydroxy-3-methylglutaryl coenzyme A synthase OS=Apis mellifera OX=7460 GN=Hmgs PE=3 SV=1		0.009	FALSE	2.903	7	1	2	1	453	50.8	7.74	0															2.13					1
FALSE	High	Master Protein	A0A088AET4	3-hydroxyisobutyryl-CoA hydrolase, mitochondrial OS=Apis mellifera OX=7460 GN=LOC412796 PE=3 SV=1		0	FALSE	161.517	57	23	297	23	440	48.7	8.75	117.34	38.85	9.99	6.26	10.89	44.48	49.23	17.94	2.05	0	25.61	10.28	17.42	26.09		67.22	75.2	68.12	74.3	13.07	17	13	8	6	3	11	13	9	4	1	5	5	7	7
FALSE	High	Master Protein	A0A088AI57	40S ribosomal protein S12 OS=Apis mellifera OX=7460 PE=3 SV=1		0	FALSE	54.676	45	7	22	7	168	18.6	7.12	15.22	2.48			2.62		9.1			2.45		2.74		22.79		2.76	4.01		3.53		3	1			1		3			1		2		3
FALSE	High	Master Protein	A0A088AVR2	40S ribosomal protein S21 OS=Apis mellifera OX=7460 GN=LOC551479 PE=3 SV=1		0	FALSE	5.056	12	1	2	1	83	9.2	6.52											0			3.07																	1			1
FALSE	High	Master Protein	A0A088A5I5	40S ribosomal protein S24 OS=Apis mellifera OX=7460 GN=LOC408799 PE=3 SV=1		0	FALSE	34.487	28	4	74	4	132	15.3	10.89	22.57	8.41	5.13	8.43	13.77	13.88	14.58	5.33	14.32	5.73						27.94	14.72	9.14	12.94	17.71	4	2	2	2	3	3	4	1	3	2
FALSE	High	Master Protein	A0A088AFP5	40S ribosomal protein S25 OS=Apis mellifera OX=7460 GN=RpS25 PE=3 SV=1		0	FALSE	49.073	36	6	129	6	119	13.4	10.36	27.55	8.39	6.17	16.47	19.43	20.21	22.7	17.18	8.02	10.19	11.97	5.83	6.97	26.41	4.88	27.5	18.25	21.51	18.13	21.9	5	2	2	4	5	6	5	4	3	3	3	2	3	5
FALSE	High	Master Protein	A0A088AKL1	40S ribosomal protein S26 OS=Apis mellifera OX=7460 GN=RpS26 PE=3 SV=1		0	FALSE	21.108	32	3	52	3	114	13.1	11.14	11.67	7.79	5.8	4.19	2.74	6.32	10.92	4.51	2.31	2.49	4.54	1.68	4.64	18.98	1.8	2.01	9.7	7.67	5.83	5.32	2	1	2	2	1	2	2	2	1	1	1	2	1	2
FALSE	High	Master Protein	A0A088A003	40S ribosomal protein S30 OS=Apis mellifera OX=7460 GN=RpS30 PE=3 SV=1		0.001	FALSE	4.866	8	1	6	1	132	14.7	10.14						2.67								2.88	1.9	2.85	3.01	2.65								1								1
FALSE	High	Master Protein	A0A088AD55	40S ribosomal protein S3a OS=Apis mellifera OX=7460 GN=RpS3A PE=3 SV=1		0	FALSE	156.646	61	18	328	18	267	30	9.66	80.28	41.45	6.69	38.01	38.56	38.62	59.58	25.23	12.63	24.03	32.23	31.47	7.05	157.21	7.62	52.66	49.85	36.87	24.06	32.87	14	12	5	11	11	11	13	10	5	8	9	9	5	13
FALSE	High	Master Protein	A0A088AHT9	40S ribosomal protein S4 OS=Apis mellifera OX=7460 GN=LOC550651 PE=3 SV=1		0	FALSE	125.408	57	16	404	16	262	29.4	10.24	87.14	44.39	14.5	31.18	51.69	53.57	71.53	40.69	31.14	45.7	15.03	20.3	13.96	89.94	9.25	74.43	65.48	58.59	64.28	67.29	14	9	5	8	9	10	14	9	8	9	5	8	8	10
FALSE	High	Master Protein	A0A088AFT2	40S ribosomal protein S6 OS=Apis mellifera OX=7460 GN=LOC725647 PE=3 SV=1		0	FALSE	48.265	24	6	104	6	251	28.9	10.95	19.28	7.77	1.84	8.2	5.82	15.15	22.96	2.23	4.8	6.69	3.55	13.33	2.25	38.53		19.54	15.94	15.37	14.28	11.91	4	2	1	3	2	3	6	1	2	3	2	4	1	5
FALSE	High	Master Protein	A0A088A8A7	40S ribosomal protein S7 OS=Apis mellifera OX=7460 GN=RpS7 PE=3 SV=1		0	FALSE	118.106	59	14	368	14	214	24.6	9.76	67.59	26.3	12.67	27.83	46.62	42.29	40.41	39.98	33.08	30.97	13.27	19.85	12.95	34.97	3.71	55.73	37.8	35.18	53.01	42.86	11	8	8	9	10	10	10	11	9	12	3	6	4	6
FALSE	High	Master Protein	A0A087ZV06	40S ribosomal protein S8 OS=Apis mellifera OX=7460 GN=Rps8 PE=3 SV=1		0	FALSE	108.897	59	12	185	12	208	23.9	10.59	42.87	25.42	6.86	15.97	18.05	25.53	44.15	13.07	6.17	11.67	20.9	16.2	12.37	63.4	2.24	43.08	36.99	18.58	23.55	21.62	9	8	3	7	5	9	9	6	2	5	5	5	4	11
FALSE	High	Master Protein	T0L9B2	40s ribosomal protein s9 OS=Nosema apis BRL 01 OX=1037528 GN=NAPIS_ORF01340 PE=4 SV=1		0.001	FALSE	5.025	5	1	17	1	187	22	9.58	3.99		1.82						3.87				1.85	3.81	0	1.92		1.78			1		1						1				1	1
FALSE	High	Master Protein	A0A087ZXD5	40S ribosomal protein SA OS=Apis mellifera OX=7460 GN=RpSA PE=3 SV=1		0	FALSE	108.676	45	9	214	9	310	33.7	5.05	56.17	27.41	0	23.11	10.4	22.97	29.22	12.28	17.93	8.92	25.63	12.85	8.24	170.04	0	58.19	14.86	16.99	43.23	13.39	7	6	1	7	4	7	6	5	5	4	3	4	5	7
FALSE	High	Master Protein	A0A093SBV7	50S ribosomal protein L1 OS=Pectobacterium carotovorum subsp. carotovorum OX=555 GN=rplA PE=3 SV=1		0	FALSE	10.462	11	2	4	1	234	24.7	9.61			2.06	2.79												2.02			2.46				1	1
FALSE	High	Master Protein	A0A0J5CEK9	50S ribosomal protein L1 OS=Serratia marcescens OX=615 GN=rplA PE=3 SV=1		0	FALSE	12.628	19	3	5	2	234	24.7	9.64			4.9	2.79												2.02			2.46				2	1
FALSE	High	Master Protein	A0A093UQ21	50S ribosomal protein L10 OS=Pectobacterium carotovorum subsp. carotovorum OX=555 GN=rplJ PE=3 SV=1		0	FALSE	9.755	21	2	2	2	165	17.8	8.98			4.95																				2
FALSE	High	Master Protein	A0A0G8B917	50S ribosomal protein L19 OS=Serratia marcescens OX=615 GN=rplS PE=3 SV=1		0.002	FALSE	4.172	13	1	2	1	118	13.5	10.78			2.87					2.46															1					1
FALSE	High	Master Protein	A0A093SBE1	50S ribosomal protein L2 OS=Pectobacterium carotovorum subsp. carotovorum OX=555 GN=rplB PE=3 SV=1		0	FALSE	14.494	15	3	7	3	273	29.9	10.93			9.13					2.63											2.28	2.32			3					1
FALSE	High	Master Protein	A0A080UXX3	50S ribosomal protein L20 OS=Serratia marcescens OX=615 GN=rplT PE=3 SV=1		0	FALSE	6.974	15	2	3	2	118	13.5	11.47			2.18																				2
FALSE	High	Master Protein	A0A084WVF9	50S ribosomal protein L22 OS=Serratia marcescens OX=615 GN=rplV PE=3 SV=1		0.003	FALSE	4.046	9	1	1	1	110	12.2	10.23			1.75																				1
FALSE	High	Master Protein	A0A0G8B608	50S ribosomal protein L4 OS=Serratia marcescens OX=615 GN=rplD PE=3 SV=1		0	FALSE	12.988	21	3	3	3	201	22.1	9.67			2.7																	3.13			2
FALSE	High	Master Protein	A0A086FJK5	50S ribosomal protein L5 OS=Serratia marcescens OX=615 GN=rplE PE=3 SV=1		0	FALSE	8.63	15	2	2	2	179	20.2	9.51			5.64																				2
FALSE	High	Master Protein	A0A087ZZV1	5-demethoxyubiquinone hydroxylase, mitochondrial OS=Apis mellifera OX=7460 GN=Coq7 PE=3 SV=1		0	FALSE	5.072	17	2	2	2	195	21.7	6.64													2.02	2.6																			1	1
FALSE	High	Master Protein	A0A088A7I3	5-formyltetrahydrofolate cyclo-ligase OS=Apis mellifera OX=7460 GN=100577699 PE=3 SV=1		0	FALSE	13.146	16	3	5	3	195	22.7	8.31	2.54										2.11			2.69		4.97					1										1			1
FALSE	High	Master Protein	A0A093SFL6	5-methyltetrahydropteroyltriglutamate--homocysteine methyltransferase OS=Pectobacterium carotovorum subsp. carotovorum OX=555 GN=KP17_10275 PE=4 SV=1		0.002	FALSE	4.332	3	1	1	1	343	38.6	5.83			1.68																				1
FALSE	High	Master Protein	B8ZX05	60 kDa chaperonin (Fragment) OS=Serratia marcescens OX=615 GN=groEL PE=3 SV=1		0	FALSE	8.495	11	3	6	2	263	27.7	4.72								0	0							2.18			6.14									1	1
FALSE	High	Master Protein	V5T6G8	60 kDa chaperonin OS=Bifidobacterium sp. Hma3N OX=1293831 GN=groL PE=3 SV=1		0	FALSE	6.525	7	3	3	2	550	57.9	4.83													0						1.62														2
FALSE	High	Master Protein	A0A087ZPA5	60S acidic ribosomal protein P0 OS=Apis mellifera OX=7460 GN=RpLP0 PE=3 SV=1		0	FALSE	139.681	52	13	283	13	317	34.4	6	77.37	24.9	5.56	49.2	42.1	47.44	69.18	33.52	24.58	34.78	21.05	9.23	6.51	95.73	7.08	61.6	64.36	56.78	74.7	71.12	9	6	2	9	6	7	10	7	5	6	5	4	2	9
FALSE	High	Master Protein	A0A088ARA9	60S ribosomal protein L13 OS=Apis mellifera OX=7460 GN=RpL13 PE=3 SV=1		0	FALSE	61.068	46	10	179	10	219	25.3	10.93	34.61	19.43	8	13.34	21.72	21.38	20.03	9.66	8.75	24.09	3.91	7.43	0	33.51	3.68	29.4	24.18	17.22	11.36	20.47	8	6	4	6	6	7	6	4	5	7	2	3	1	5
FALSE	High	Master Protein	A0A088AH51	60S ribosomal protein L18 OS=Apis mellifera OX=7460 GN=102654426 PE=4 SV=1		0	FALSE	68.864	46	9	220	9	188	21.7	11.75	53.16	25.47	29.24	16.42	36.34	37.51	33.2	23.6	23.63	13.05	12.43	12.45	2.92	114.41	4.12	49.52	39.04	36.7	34.91	32.73	6	4	4	3	6	7	6	4	4	4	3	2	2	6
FALSE	High	Master Protein	A0A088A7V4	60S ribosomal protein L18a OS=Apis mellifera OX=7460 GN=RpL18A PE=3 SV=1		0	FALSE	64.633	48	13	193	13	177	21	10.7	38.67	19.7	2.37	8.45	19.57	15.39	30.18	17.29	9.82	7.99	10.08	11.82	4.31	42.49	6.98	34.42	26.36	19.54	25.41	15.92	11	7	4	4	7	6	10	7	4	4	2	4	3	8
FALSE	High	Master Protein	C4V909	60S ribosomal protein L20 OS=Nosema ceranae (strain BRL01) OX=578460 GN=NCER_101017 PE=3 SV=1		0.002	FALSE	4.161	5	1	1	1	180	21	9.41									1.75																				1
FALSE	High	Master Protein	A0A088ACL1	60S ribosomal protein L27 OS=Apis mellifera OX=7460 GN=RpL27 PE=3 SV=1		0	FALSE	26.01	33	5	69	5	134	16.1	10.59	17.25	7.91	1.88	1.97	3.09	9.22	10.71	6.04	4.22	4.56	2.58		1.98	15.03	2.44	9.4	13.94	8.06	8.83	10.07	4	3	1	3	1	3	3	3	2	2	2		2	4
FALSE	High	Master Protein	A0A088ACQ3	60S ribosomal protein L29 OS=Apis mellifera OX=7460 GN=RpL29 PE=3 SV=1		0	FALSE	12.554	17	2	13	2	71	8.6	11.58	5.44			2.02		6.43				6.37	1.61			3.48			5.37			2.94	2			2		2				2	1			1
FALSE	High	Master Protein	H9K170	60S ribosomal protein L32 OS=Apis mellifera OX=7460 GN=RpL32 PE=4 SV=1		0	FALSE	61.348	41	8	88	8	134	15.9	11.6	16.84	17.36	5.17	7.51	8.91	11.6	18.29	4.77	7.88	3.03	5.97	7.3	5.52	15.33	0	20.81	16.59	5.77	10.34	13.95	4	7	3	4	3	4	5	1	2	1	1	2	2	3
FALSE	High	Master Protein	A0A0B4J2P3	60S ribosomal protein L36 OS=Apis mellifera OX=7460 GN=RpL36 PE=3 SV=1		0	FALSE	31.015	36	6	47	6	115	13.4	11.5	8.48	0		0	6.82	6.81	5.26	2.33		5.05	6.4	2.09		11.24	4.31	6.14	6.07	7	7.09	14.06	3	2		1	2	2	2	1		2	2	1		2
FALSE	High	Master Protein	A0A087ZWB6	6PF2K domain-containing protein OS=Apis mellifera OX=7460 PE=4 SV=1		0	FALSE	27.159	13	5	9	5	452	52.3	6.54	3.65										2.85			11.09		5.28					1										2			3
FALSE	High	Master Protein	A0A088AHG6	6-phosphofructokinase OS=Apis mellifera OX=7460 PE=3 SV=1		0	FALSE	237.778	41	28	331	28	886	98.5	6.68	78.81	35.87	32.45	44.74	21.15	73.48	55.65	24.35	19.02	22.05	34.07	25.5	38.56	64.12	0	82.78	67.96	33.5	90.5	19.51	14	10	11	12	5	14	13	8	7	7	6	10	12	9
FALSE	High	Master Protein	A0A088AKI3	6-phosphogluconate dehydrogenase, decarboxylating OS=Apis mellifera OX=7460 GN=Pgd PE=3 SV=1		0	FALSE	222.378	72	23	268	23	482	52.9	7.46	138.94	12.63	2.73	28.6	22.97	44.2	7.59	6.36	14.94	7	15.55	4.13	23.79	37.83	0	128.98	4.98	3.76	71.5	2.09	19	6	1	12	6	13	5	4	7	4	6	4	8	8
FALSE	High	Master Protein	A0A093SNV0	6-phosphogluconate dehydrogenase, decarboxylating OS=Pectobacterium carotovorum subsp. carotovorum OX=555 GN=KP17_05655 PE=3 SV=1		0	FALSE	9.936	8	2	4	2	468	51.5	5.24			4.56					0															2					1
FALSE	High	Master Protein	A0A088A588	6-phosphogluconolactonase OS=Apis mellifera OX=7460 GN=LOC551785 PE=3 SV=1		0	FALSE	46.117	42	6	25	6	238	26.2	5.97	20.55				2.36	0	2.94	0			0		0	10.12		13.99	0		2.82		4				1	1	1	1			1		1	2
FALSE	High	Master Protein	A0A088AJT7	Aa_trans domain-containing protein OS=Apis mellifera OX=7460 GN=LOC410741 PE=4 SV=1		0	FALSE	13.553	11	3	10	3	508	56.5	6.71	3	2.65	2.7				5.63	1.91									2.12	3.33			1	2	1				3	1
FALSE	High	Master Protein	A0A088AIY5	Aa_trans domain-containing protein OS=Apis mellifera OX=7460 GN=LOC552193 PE=4 SV=1		0	FALSE	12.652	7	2	8	2	481	53.9	7.83		0					3.02						2.38				0	0				1					1						1
FALSE	High	Master Protein	A0A088A551	Aa_trans domain-containing protein OS=Apis mellifera OX=7460 GN=path PE=4 SV=1		0	FALSE	52.726	18	7	76	7	468	51.6	6.95	12.04	9.08	11.64	4.13	17.87	11.12	23.56	14.43	1.83	2.47	16.19	7.67		25.83		3.84	12.14	23.29	5.81	1.87	4	2	4	2	4	3	5	4	1	1	4	3		4
FALSE	High	Master Protein	A0A088AMB2	AA_TRNA_LIGASE_II domain-containing protein OS=Apis mellifera OX=7460 GN=Aats-asp PE=3 SV=1		0	FALSE	7.54	4	2	2	2	533	60.5	7.05	2.66													1.92							1													1
FALSE	High	Master Protein	A0A087ZNA9	AA_TRNA_LIGASE_II domain-containing protein OS=Apis mellifera OX=7460 GN=Aats-ser PE=4 SV=1		0	FALSE	7.489	4	1	3	1	427	49.5	8.76													2.42				3.94	3.38															1
FALSE	High	Master Protein	A0A088AUV5	AA_TRNA_LIGASE_II domain-containing protein OS=Apis mellifera OX=7460 GN=LOC410806 PE=3 SV=1		0	FALSE	20.706	12	6	8	6	603	68.6	6.57	3.08								2.19				0	2.62		5.16	1.73		2.21		1								1				1	1
FALSE	High	Master Protein	A0A087ZP92	AA_TRNA_LIGASE_II domain-containing protein OS=Apis mellifera OX=7460 GN=LOC412200 PE=3 SV=1		0	FALSE	106.605	34	20	49	20	714	83.3	7.03	36.81	1.6				4.92			1.68		5.65	0	4.08	29.24		26.23	0	2.26	4.26		13	1				2			1		2	1	3	10
FALSE	High	Master Protein	A0A088A397	AA_TRNA_LIGASE_II domain-containing protein OS=Apis mellifera OX=7460 GN=LOC413011 PE=4 SV=1		0	FALSE	22.564	15	4	6	4	496	57.4	7.24	9.66													5.87		2.78					3													1
FALSE	High	Master Protein	A0A087ZU43	AA_TRNA_LIGASE_II domain-containing protein OS=Apis mellifera OX=7460 GN=LOC551088 PE=4 SV=1		0	FALSE	59.925	22	8	26	8	556	64.5	6.23	20.93					2.5							0	26.78		17.69		0	3.65		6					1							1	5
FALSE	High	Master Protein	A0A088ADF9	AA_TRNA_LIGASE_II domain-containing protein OS=Apis mellifera OX=7460 GN=LOC726436 PE=4 SV=1		0	FALSE	20.437	17	6	43	6	433	49.4	8.76	5.29	2.11	2.28	2.07	2.61	5.33	3.22	3.22	2.92	2.42			3.99			9.22	4.53	7.41	4.94	2.14	2	2	2	2	2	2	2	2	1	1			3
FALSE	High	Master Protein	A0A088AUH7	AA_TRNA_LIGASE_II domain-containing protein OS=Apis mellifera OX=7460 PE=4 SV=1		0	FALSE	6.478	5	1	5	1	422	48.3	8.05	2.25					0										3.11		3.6	2.78		1					1
FALSE	High	Master Protein	A0A088ARS3	AAA domain-containing protein OS=Apis mellifera OX=7460 GN=bor PE=4 SV=1		0	FALSE	103.582	36	22	125	22	608	68.8	9.03	27.44	1.8	11.42	0	13.43	10.52	18.28	16.09	2.21	9.67	14.72	0	8.21	27.74	0	23.94	14.36	5.98	24.46	6.47	9	2	5	2	7	4	9	9	2	4	7	1	6	9
FALSE	High	Master Protein	A0A088ADA2	AAA domain-containing protein OS=Apis mellifera OX=7460 GN=LOC409178 PE=4 SV=1		0	FALSE	6.786	6	2	3	2	734	82.3	8.92					5.66										0										2
FALSE	High	Master Protein	A0A0B4J2L4	AAA domain-containing protein OS=Apis mellifera OX=7460 GN=LOC410026 PE=3 SV=1		0	FALSE	151.268	67	18	84	18	415	47	5.33	45.62			0	0	15.69	9.12	0	1.9		2.04	1.73		31.64		54.65	15.01	7.6	23.27	3.27	8			2	1	4	3	2	1		3	1		8
FALSE	High	Master Protein	A0A088A5P5	AAA domain-containing protein OS=Apis mellifera OX=7460 GN=LOC410289 PE=4 SV=1		0	FALSE	67.299	29	17	45	17	752	85.5	9.23	10.94	2.38	0		4.21	6.56	0	2.14	2.49		7.01	2.24	0	4.96	0	14.92	4.86	12.88	3.28	2.52	5	1	3		3	3	1	3	1		3	2	1	4
FALSE	High	Master Protein	A0A088AW81	AAA domain-containing protein OS=Apis mellifera OX=7460 GN=LOC411858 PE=3 SV=1		0	FALSE	7.68	6	2	2	2	376	42.5	6.8														2.75																				2
FALSE	High	Master Protein	A0A0B4J2N0	AAA domain-containing protein OS=Apis mellifera OX=7460 GN=LOC550794 PE=3 SV=1		0	FALSE	105.394	47	14	137	13	405	45.7	8.5	61.47	9.34	5.16	12.88	7.33	22.52	29.83	8.92	7.86	9.91	11.98	7.81	3.09	40.85		56.35	32.86	20.97	28.63	2.31	13	4	3	5	2	5	8	5	3	4	3	2	1	8
FALSE	High	Master Protein	A0A0B4J2P2	AAA domain-containing protein OS=Apis mellifera OX=7460 GN=LOC551386 PE=3 SV=1		0	FALSE	123.288	58	16	110	16	393	44.5	7.44	72.24	8.59		7.31	1.93	22.1	16.81	2.67	4.48			2.47	4.48	16.03		52.79	17.24	14.03	29.58	2.79	13	4		5	1	5	5	1	3			1	2	5
FALSE	High	Master Protein	A0A088A5D5	AAA domain-containing protein OS=Apis mellifera OX=7460 GN=LOC552166 PE=3 SV=1		0	FALSE	304.195	48	33	613	33	803	91	8.76	133.25	51.26	79.82	43.46	91.3	77.92	85.09	92.52	48.27	39.48	36.93	28.07	42.44	152.04	20.13	99.46	76.8	104.92	94.94	38.66	24	14	21	16	18	18	22	23	16	15	11	12	11	12
FALSE	High	Master Protein	A0A0B4J2L7	AAA domain-containing protein OS=Apis mellifera OX=7460 GN=Pros26.4 PE=3 SV=1		0	FALSE	69.136	34	10	47	9	440	49.2	6.76	18.83			0		15.21	8.46	0			9.45	8.23	4.93	26.47	0	23.82	5.09		3.35	0	6			1		5	3	1			4	4	2	6
FALSE	High	Master Protein	A0A088A957	AAA domain-containing protein OS=Apis mellifera OX=7460 GN=Rpt1 PE=3 SV=1		0	FALSE	119.267	53	17	99	17	434	48.4	6.07	35.37	4.68		3.76	0	21.92	13.78	2.62	2.1		12.24	6.39	1.63	56.74		41.24	10.53	14.66	10.13	1.98	8	5		3	1	6	5	1	1		6	4	2	10
FALSE	High	Master Protein	A0A088AC90	AAA domain-containing protein OS=Apis mellifera OX=7460 GN=Tbp-1 PE=3 SV=1		0	FALSE	161.21	58	18	143	17	428	47.6	5.17	91.68	9.43		4.78	5.97	47.37	26.67	5.02	2.47	4.43	5.16	11.82	4.19	59.67		63.11	22.66	25.41	37.51	7.63	13	4		3	2	8	5	4	1	2	2	5	2	11
FALSE	High	Master Protein	A0A088A5F9	AAA domain-containing protein OS=Apis mellifera OX=7460 PE=4 SV=1		0.002	FALSE	4.253	3	1	1	1	320	37	7.5														2.61																				1
FALSE	High	Master Protein	A0A088AVP1	AAA_28 domain-containing protein OS=Apis mellifera OX=7460 PE=4 SV=1		0	FALSE	5.115	3	1	1	1	520	59.4	8.12			2.24																				1
FALSE	High	Master Protein	A0A088AB81	Aamy domain-containing protein OS=Apis mellifera OX=7460 GN=AGLU-like2 PE=4 SV=1		0	FALSE	56.101	26	10	33	10	616	69.7	5.17	12.68		0		9.14	3.91	2.12	2.87						10.56		1.63	3.89	16.37			5		3		5	3	2	2						3
FALSE	High	Master Protein	A0A088AAX5	Aamy domain-containing protein OS=Apis mellifera OX=7460 PE=4 SV=1		0	FALSE	6.936	2	2	5	2	798	89.9	6.06	2.02				1.81	1.95	1.61				0										1				1	1	1				1
FALSE	High	Master Protein	A0A088AQB1	AB hydrolase-1 domain-containing protein OS=Apis mellifera OX=7460 GN=Hydr1 PE=4 SV=1		0	FALSE	9.834	11	3	4	3	393	44	7.85				0							4.07						2.71							1							2
FALSE	High	Master Protein	A0A088ANJ8	AB hydrolase-1 domain-containing protein OS=Apis mellifera OX=7460 GN=LOC414038 PE=4 SV=1		0	FALSE	8.147	7	2	4	2	318	36	9.6													4.42	2.8																			2	1
FALSE	High	Master Protein	A0A088A337	AB hydrolase-1 domain-containing protein OS=Apis mellifera OX=7460 GN=LOC552611 PE=4 SV=1		0	FALSE	30.776	18	4	10	4	388	43.8	7.55	10.51						2.1	0	0					5.62		7.75			3.37		3						1	1	1					1
FALSE	High	Master Protein	A0A088A9Q3	AB hydrolase-1 domain-containing protein OS=Apis mellifera OX=7460 PE=4 SV=1		0	FALSE	6.153	5	2	3	2	506	57.1	6.64											0		1.86				0														1		1
FALSE	High	Master Protein	A0A087ZYZ0	AB hydrolase-1 domain-containing protein OS=Apis mellifera OX=7460 PE=4 SV=1		0	FALSE	99.646	59	13	130	13	258	29.5	8.07	79.71				16	38.66		24.32	6.21	1.74	2.08			14.3		76.07		33.15	41.65	0	10				3	9		10	5	2	1			6
FALSE	High	Master Protein	A0A088AC12	AB hydrolase-1 domain-containing protein OS=Apis mellifera OX=7460 PE=4 SV=1		0.004	FALSE	3.941	4	1	3	1	305	35.2	8.95						2.28										2.64		2.26								1
FALSE	High	Master Protein	Q8WSY9	Abaecin (Fragment) OS=Apis mellifera OX=7460 PE=2 SV=1		0	FALSE	9.989	45	1	12	1	33	3.6	10.02				14.87		2.85				12.91						3.89				4.08				1		1				1
FALSE	High	Master Protein	A0A088AF57	ABC transporter domain-containing protein OS=Apis mellifera OX=7460 GN=LOC409666 PE=4 SV=1		0	FALSE	10.195	5	3	6	3	799	89.4	6.96	3.66						2.61						1.62			2.49			2.74		1						1						2
FALSE	High	Master Protein	A0A088AJT2	ABC transporter domain-containing protein OS=Apis mellifera OX=7460 PE=4 SV=1		0.005	FALSE	3.753	2	1	1	1	606	68.9	7.84														2.43																				1
FALSE	High	Master Protein	A0A087ZQY9	ABC transporter domain-containing protein OS=Apis mellifera OX=7460 PE=4 SV=1		0	FALSE	9.073	5	4	5	4	620	69.4	6.68	2.21						0						1.78								1						1						3
FALSE	High	Master Protein	A0A088AHK0	Abhydrolase_2 domain-containing protein OS=Apis mellifera OX=7460 GN=LOC409201 PE=4 SV=1		0	FALSE	17.237	20	4	16	4	219	23.8	7.53		3.69	0	2.25	1.94				1.78	2.01	2.54		4.27	0		1.76			4.28			1	1	2	1				1	1	1		2	1
FALSE	High	Master Protein	A0A087ZSM9	ACB domain-containing protein OS=Apis mellifera OX=7460 GN=LOC411272 PE=4 SV=1		0	FALSE	13.969	39	3	8	3	89	10	7.18				2.67					0		2.28	2.06	2.01	2.56		2.37								1					1		1	1	1	1
FALSE	High	Master Protein	V5YUX8	Acetyl-CoA carboxylase biotin carboxylase subunit OS=Serratia marcescens OX=615 GN=accC PE=4 SV=1		0.01	FALSE	2.872	3	1	1	1	449	49.5	6.8			0																				1
FALSE	High	Master Protein	A0A088ADC5	AcetylCoA_hyd_C domain-containing protein OS=Apis mellifera OX=7460 PE=4 SV=1		0	FALSE	262.694	60	19	557	19	448	49.6	7.81	158.77	102.1	32.44	50.43	50.01	119.24	131.45	87.93	53.61	2.32	51.64	32.72	114.96	97.08		106.15	100.36	145.73	53.45	44	14	13	8	12	11	14	15	14	11	1	9	7	15	10
FALSE	High	Master Protein	A0A088ADU5	acidPPc domain-containing protein OS=Apis mellifera OX=7460 GN=LOC552437 PE=4 SV=1		0.002	FALSE	4.287	6	1	2	1	212	24.4	9	2.58						2.54														1						1
FALSE	High	Master Protein	A0A087ZXK3	Aconitate hydratase, mitochondrial OS=Apis mellifera OX=7460 GN=LOC408446 PE=3 SV=1		0	FALSE	546.228	59	47	1058	47	788	85.9	8.44	458.17	148.97	19.06	103.95	92.23	294.96	187.07	102.93	17.41	13.15	198.25	168.82	125.28	259.14		374.31	96.91	194.23	258.07	45.45	40	31	11	25	19	37	29	24	10	4	23	25	26	30
FALSE	High	Master Protein	O15560	Actin (Fragment) OS=Antonospora locustae OX=278021 GN=ACT1 PE=3 SV=1		0	FALSE	35.844	14	4	599	3	327	36.3	6.19	67.7	35.14	26.2	46.31	51.68	30.35	44.97	22.43	24.72	24.35	34.89	134.78	84.16	105.57	24.12	28.62	48.25	78.84	57.22	28.11	2	1	2	1	1	1	1	2	3	1	1	2	1	1
FALSE	High	Master Protein	A0A088AJ79	Actin-related protein 2 OS=Apis mellifera OX=7460 GN=LOC409313 PE=3 SV=1		0	FALSE	24.516	21	6	23	6	406	46	6.47	12.68	2.76		4.22	0	4.63	2.6				4.99		2.45	8.96		6.46	0				3	1		1	1	2	2				2		2	2
FALSE	High	Master Protein	A0A087ZYS4	Actin-related protein 2/3 complex subunit 3 OS=Apis mellifera OX=7460 GN=Arpc3A PE=3 SV=1		0	FALSE	21.316	27	4	16	4	177	20.2	8.51	9.47	0		1.81	2.09	0	1.6	0	2.44					2		4.68	0		2.39		3	1		1	1	1	1	1	1					1
FALSE	High	Master Protein	A0A088A168	Actin-related protein 2/3 complex subunit 4 OS=Apis mellifera OX=7460 GN=Arpc4 PE=3 SV=1		0	FALSE	14.437	18	3	13	3	168	19.7	8.57	8.77	3.01		4.68	2.84	2.87		0			2.6			4.73		2.53					2	1		2	1	1		1			1			2
FALSE	High	Master Protein	A0A088A6E7	Actin-related protein 2/3 complex subunit 5 OS=Apis mellifera OX=7460 GN=p16-ARC PE=3 SV=1		0	FALSE	10.068	20	3	12	3	157	17.3	5.64	4.07	1.82			0	0	0					2.13	0	2.12		0	0				1	1			1	1	1					1	1	2
FALSE	High	Master Protein	A0A088A9T8	Actin-related protein 2/3 complex subunit OS=Apis mellifera OX=7460 GN=Sop2 PE=3 SV=1		0	FALSE	13.617	8	2	3	2	368	41	7.46		1.82					2.03							3.93								1					1							1
FALSE	High	Master Protein	A0A088AVR3	Acyl carrier protein OS=Apis mellifera OX=7460 PE=3 SV=1		0	FALSE	30.555	31	7	98	7	187	21.5	8.43	15.67	10.9	13.19	8.74	14.8	4.91	15.69	14.1	16.03	15.07	4.45	10.84	6.34	1.62	3.42	10.33	8.41	11.36	9.96	4.4	4	3	4	4	4	1	5	4	6	4	2	4	2	1
FALSE	High	Master Protein	A0A087ZVT1	Acyl-coenzyme A oxidase OS=Apis mellifera OX=7460 GN=LOC412020 PE=3 SV=1		0	FALSE	20.003	9	4	19	4	676	77	7.8	7.59	1.82					4.28									8.44	1.71	11.56			4	1					2
FALSE	High	Master Protein	A0A088ARZ1	Acyl-coenzyme A oxidase OS=Apis mellifera OX=7460 PE=3 SV=1		0	FALSE	99.157	30	15	71	15	663	75	7.46	6.73	31.92				2.98	40.53				6.2	4.17		8.71		15.45	48.34	6.21	4.17		2	11				2	12				2	3		3
FALSE	High	Master Protein	A0A087ZTP2	ADAM_spacer1 domain-containing protein OS=Apis mellifera OX=7460 PE=4 SV=1		0	FALSE	55.339	18	12	43	12	843	92.9	8.38	2.6	4.48			10.24	2.27	2.43	0		12.88				2.29	2		4.24		9.8	19.37	1	3			5	1	2	3		3				1
FALSE	High	Master Protein	A0A088A8Z7	Adaptin_N domain-containing protein OS=Apis mellifera OX=7460 GN=g PE=4 SV=1		0	FALSE	5.696	2	2	2	2	1189	135.3	7.3	2.52																			0	1
FALSE	High	Master Protein	A0A088A1B6	Adenosylhomocysteinase OS=Apis mellifera OX=7460 GN=LOC408368 PE=3 SV=1		0	FALSE	10.099	6	2	6	2	433	47.9	7.28	2.66			3.13		2.28										2.03			2.39		1			1		1
FALSE	High	Master Protein	A0A087ZTP9	Adenosylhomocysteinase OS=Apis mellifera OX=7460 GN=LOC551762 PE=3 SV=1		0	FALSE	36.625	14	6	16	5	532	58.6	7.24	3.79	5.12	0	2.78			3.27				2.57		4.19	9.25			0				2	2	1	2			2				1		2	3
FALSE	High	Master Protein	A0A0B4J2L5	Adenylate kinase OS=Apis mellifera OX=7460 GN=Adk2 PE=3 SV=1		0	FALSE	110.061	62	15	183	15	252	28.5	8.05	39.38	25.4	6.3	16.87	8.23	34.51	34.12	19.28	8.58	3.76	25.27	21.27	9.25	29.37		28.63	14.39	30.32	31.98	14.95	8	8	2	11	4	7	8	7	3	2	7	6	4	7
FALSE	High	Master Protein	A0A087ZXT6	Adenylosuccinate synthetase OS=Apis mellifera OX=7460 GN=LOC409299 PE=3 SV=1		0	FALSE	32.89	14	5	21	5	449	49.3	8.12	3.24	7.33		0	2.26	5.15	2.29	0	0			2.29		4.58			0	0	3.32		1	2		1	2	1	1	1	1			1		1
FALSE	High	Master Protein	A0A087ZPC0	Adenylyl cyclase-associated protein OS=Apis mellifera OX=7460 GN=LOC410158 PE=4 SV=1		0	FALSE	85.046	24	14	61	14	767	85.1	5.36	54.87	4.74		10.6	2.43	22.78	2.36		2.36		2.83	6.63		13.72		26.14	2.49	2.56	10.1		10	2		6	1	6	1		1		1	3		7
FALSE	High	Master Protein	A0A088AUH4	ADF-H domain-containing protein OS=Apis mellifera OX=7460 GN=LOC725718 PE=3 SV=1		0	FALSE	39.834	36	4	47	4	148	16.8	6.57	14.7	6.76	4.63	14.09		2.5	5.52	2.2	13.14	2.43	10.37	8.62	6.88	20.71		11.45			2.82		4	2	2	4		1	2	1	3	1	3	2	2	3
FALSE	High	Master Protein	Q6VQ13	ADP/ATP translocase OS=Apis mellifera OX=7460 GN=Ant PE=2 SV=1		0	FALSE	379.1	88	29	3228	29	300	33	9.69	319.18	229.87	280.27	180.86	317.12	250.14	279.47	301.08	200.95	139.97	552.64	448.43	649.08	1018.91	87.36	255.89	282.34	278.5	231.64	167.64	20	21	24	22	21	20	19	21	19	19	19	14	20	23
FALSE	High	Master Protein	A0A088AJL2	Aha1_N domain-containing protein OS=Apis mellifera OX=7460 GN=LOC551720 PE=4 SV=1		0.009	FALSE	2.96	3	1	1	1	338	39.1	5.97	0																				1
FALSE	High	Master Protein	A0A087ZSV2	AIP3 domain-containing protein OS=Apis mellifera OX=7460 PE=4 SV=1		0	FALSE	14.151	4	2	8	2	577	63.1	9.04	5.22				2.24	2.69					2.15					2.58		2.53		0	1				1	1					1
FALSE	High	Master Protein	A0A088AL04	AIRC domain-containing protein OS=Apis mellifera OX=7460 GN=ade5 PE=3 SV=1		0	FALSE	30.444	26	7	14	7	420	47.2	7.43						2.85					4.31	0	5.1	9.13		7.94										1					1	1	4	2
FALSE	High	Master Protein	A0A2I2C0H1	Alcohol dehydrogenase AdhP OS=Enterococcus faecalis OX=1351 GN=CYR78_02525 PE=4 SV=1		0.007	FALSE	3.108	3	1	3	1	338	35.9	5.87																1.98			1.91	1.98
FALSE	High	Master Protein	A0A088ACS2	Aldedh domain-containing protein OS=Apis mellifera OX=7460 GN=Aldh PE=3 SV=1		0	FALSE	344.002	84	32	738	32	510	55.7	7.14	215.36	116.93	53.32	55.98	23.46	149.6	206.76	72.69	20.27	3.03	101.98	92.65	35.21	195.14	0	187.74	260.89	139.66	132.8	48.99	26	22	13	15	5	20	26	17	8	1	15	17	8	18
FALSE	High	Master Protein	A0A087ZNH4	Aldedh domain-containing protein OS=Apis mellifera OX=7460 GN=LOC409736 PE=4 SV=1		0	FALSE	245.639	67	24	277	24	520	56	8.03	146.66	19.98	4.95	27.01	5.13	66.83	28.68	38.18	12.52		22.65	19.25	8.97	95.38	0	117.2	46.23	44.06	75.94	17.17	18	6	2	9	2	14	8	9	3		5	7	4	11
FALSE	High	Master Protein	A0A088AAD1	Aldedh domain-containing protein OS=Apis mellifera OX=7460 GN=Ssadh PE=4 SV=1		0	FALSE	289.967	61	29	599	29	503	55.6	8.4	189.33	83.01	32.27	58.68	36.97	159.03	145.13	86.9	40.28	5.69	38.28	33.87	36.66	96.65	2.56	168.47	116.71	188.96	121.37	63.99	24	18	14	17	9	25	23	20	14	4	9	10	9	13
FALSE	High	Master Protein	A0A088AID7	Aldedh domain-containing protein OS=Apis mellifera OX=7460 PE=3 SV=1		0	FALSE	153.401	60	20	187	19	487	52.9	5.8	56.33			27.95	50.23	28.91	8.5	25.6	11.37	34.43	10.03	11.38	1.95	68.72	0	60.85		24.75	58.44	25.8	11			9	12	9	3	9	5	11	3	5	2	13
FALSE	High	Master Protein	A0A088ANX1	Aldehyde dehydrogenase OS=Apis mellifera OX=7460 PE=3 SV=1		0	FALSE	94.478	41	17	110	17	551	62.3	7.33	47.16	12.9	18.99	2.04	10.66	4.8	14.5	7.77	4.43	3.57			2.3	19.44	1.63	24.4	7.35	17.4	5.18	2.5	10	5	9	2	4	4	7	6	2	2			2	4
FALSE	High	Master Protein	A0A087ZZ66	Aldo_ket_red domain-containing protein OS=Apis mellifera OX=7460 GN=LOC411202 PE=4 SV=1		0	FALSE	12.591	8	2	2	2	321	37.2	7.87	6.77																				2
FALSE	High	Master Protein	A0A088AGI6	Aldo_ket_red domain-containing protein OS=Apis mellifera OX=7460 GN=LOC412163 PE=4 SV=1		0	FALSE	47.292	33	9	72	8	311	35.2	7.87	16.36		2.45	24.56	7.98	8.67		7.52	16.8	20.09	2.29	4.25	1.73	6.98		12.19			5.47	9.68	6		2	8	2	3		4	4	6	1	2	2	3
FALSE	High	Master Protein	A0A088AGZ3	Aldo_ket_red domain-containing protein OS=Apis mellifera OX=7460 GN=LOC551849 PE=4 SV=1		0	FALSE	5.799	4	1	2	1	343	39.1	7.3	2.83													0							1													1
FALSE	High	Master Protein	A0A088AGI8	Aldo_ket_red domain-containing protein OS=Apis mellifera OX=7460 GN=LOC551968 PE=4 SV=1		0	FALSE	219.876	86	21	319	21	318	36.1	6.73	182.49	0		37.43	42.21	55.58	0	18.86	14.97	23.97	23.17	17.07	18.37	76.28		151.19		9.51	77.3	30.59	18	4		14	10	12	1	9	7	11	6	5	7	13
FALSE	High	Master Protein	A0A088AGI5	Aldo_ket_red domain-containing protein OS=Apis mellifera OX=7460 PE=4 SV=1		0	FALSE	155.569	73	19	193	18	318	36.4	7.09	101.93	27.4	1.69	27.34	4.29	29.68	37.51	1.77	1.69	10.89	16.05	16.71	16.18	31.89		108.28	15.23	4.68	51.28	11.41	18	8	1	9	2	9	12	1	1	5	4	6	5	5
FALSE	High	Master Protein	A0A088AEU8	Aldolase_II domain-containing protein OS=Apis mellifera OX=7460 GN=LOC409713 PE=4 SV=1		0	FALSE	334.392	28	31	496	31	1325	150.9	5.08	110.84	145.18	18.06	44.2	122.91	104.37	95.84	43.58	24.87	67.09	73.51	98.86	9.82	144.07	10.25	63.07	76	99.67	93.32	44.98	18	22	4	13	18	20	20	9	5	16	15	19	5	21
FALSE	High	Master Protein	A0A088AME9	Alkaline phosphatase OS=Apis mellifera OX=7460 GN=LOC410530 PE=3 SV=1		0	FALSE	12.021	4	1	1	1	534	59.4	7.87																		3.93
FALSE	High	Master Protein	A0A088AUU8	Alkaline phosphatase OS=Apis mellifera OX=7460 GN=LOC551687 PE=3 SV=1		0	FALSE	47.782	21	7	19	7	556	62.3	6.95	2.08							2.05						14.9		19.14		6.4	9.19		1							1						2
FALSE	High	Master Protein	A0A088A8P3	Alkylglycerone-phosphate synthase OS=Apis mellifera OX=7460 PE=3 SV=1		0	FALSE	85.308	30	9	35	9	562	63.3	8.09	18.14			0					6.32	2.05				2.85		54.42		9.96	14.66		4			1					2	1				1
FALSE	High	Master Protein	P83563	Allergen Api m 6.03 / Api m 6.04 OS=Apis mellifera OX=7460 PE=1 SV=2		0	FALSE	6.718	12	2	4	2	92	9.8	9.69					1.86					1.81															1					2
FALSE	High	Master Protein	A0A087ZVF4	Alpha-1,4 glucan phosphorylase OS=Apis mellifera OX=7460 GN=GlyP PE=3 SV=1		0	FALSE	48.279	15	10	18	10	844	97.3	6.37	2.74	2.05		0							0	0	1.68	12.06		12.69			2.13		1	2		1							2	1	2	3
FALSE	High	Master Protein	A0A088A5W1	Alpha-carbonic anhydrase domain-containing protein OS=Apis mellifera OX=7460 GN=CAH1 PE=3 SV=1		0	FALSE	12.858	10	2	16	2	273	30.7	6.65	3.44	10.93		1.66			11.12	2.07				0	1.71	2.68			1.95				1	2		1			2	1				1	1	1
FALSE	High	Master Protein	A0A088A332	Alpha-galactosidase OS=Apis mellifera OX=7460 PE=3 SV=1		0	FALSE	13.043	8	2	2	2	388	44.6	5.3													2.07	2.01																			1	1
FALSE	High	Master Protein	Q25BT8	Alpha-glucosidase OS=Apis mellifera OX=7460 GN=hbg1 PE=4 SV=1		0	FALSE	71.494	38	18	66	18	588	67.3	6.61	2.51		15.33	7.81		2.25		11.01	37.51				10.96	1.61		9.72		0	3.1		3		9	4		2		7	13				7	1
FALSE	High	Master Protein	Q25BT7	Alpha-glucosidase OS=Apis mellifera OX=7460 GN=hbg2 PE=4 SV=1		0	FALSE	86.474	28	12	69	12	580	66.5	6.28	5.4		2.31	24.77		9.5		1.88	48.86	6.1	17.06	2.72	7.05			13.24	2.3		2.17		2		1	7		3		1	9	2	3	1	4
FALSE	High	Master Protein	A0A088APY3	Amidase domain-containing protein OS=Apis mellifera OX=7460 GN=LOC408742 PE=4 SV=1		0	FALSE	114.172	46	16	130	16	536	60.1	8.76	23.71	44.15	8.1	6.31	0	6.35	69.58				14.2	12.06	9.87	18.41	0	14.78	64.43	8.56	7.97	2.32	6	10	3	3	1	3	14				4	4	5	3
FALSE	High	Master Protein	A0A088A8Y7	Amidase domain-containing protein OS=Apis mellifera OX=7460 PE=4 SV=1		0	FALSE	46.237	21	8	36	8	540	60.9	7.93	10.03	2.34			2.47	6.36	10.62	0			4.76	2.13	0	8.46		7.85	11.74	6.91	5.94		2	3			1	2	5	2			2	1	1	3
FALSE	High	Master Protein	A0A088ALH3	Amidohydro-rel domain-containing protein OS=Apis mellifera OX=7460 PE=4 SV=1		0	FALSE	22.283	7	3	3	3	688	74.9	6.23												1.67		7.81																		1		2
FALSE	High	Master Protein	A0A088A150	Amino acid transporter OS=Apis mellifera OX=7460 GN=LOC409919 PE=3 SV=1		0	FALSE	18.161	7	3	8	3	503	54.6	6.65	6.51							3.56						2.9		2.91		7.78			2							1						1
FALSE	High	Master Protein	A0A088A624	Amino acid transporter OS=Apis mellifera OX=7460 PE=3 SV=1		0	FALSE	99.33	34	11	140	11	486	52.9	6.57	24.55		7.66		20.85	31.91		48.02	8.64	13.29	11	4.2	2.23	59.19	6.2	42.18	0	61.15	28	32.85	5		3		5	5		7	4	3	4	2	1	7
FALSE	High	Master Protein	A0A087ZSE6	Aminomethyltransferase OS=Apis mellifera OX=7460 GN=LOC410550 PE=3 SV=1		0	FALSE	121.976	54	15	92	15	455	49.6	9.42	73.27	4.64		0	9.93	44.41	1.84	6.75			4.85	2.23		10.26		45.15	5.25	10.43	22.51		12	2		1	2	10	1	3			2	1		4
FALSE	High	Master Protein	A0A087ZU14	Aminopeptidase OS=Apis mellifera OX=7460 GN=LOC412263 PE=3 SV=1		0	FALSE	8.143	2	1	3	1	970	111.4	6.18						2.15													2.12							1
FALSE	High	Master Protein	A0A087ZUG8	Aminopeptidase OS=Apis mellifera OX=7460 GN=LOC412808 PE=3 SV=1		0	FALSE	465.134	57	46	760	45	982	112.4	7.15	147.17	266.69	69.15	54.99	35.83	119.57	336.3	54.33	2.86	24.14	45.14	26.27	5.91	128.1	11.89	74.58	308.27	113.82	96.73	94.32	24	44	23	18	12	25	43	19	2	13	11	11	1	21
FALSE	High	Master Protein	A0A087ZUB3	Aminopeptidase OS=Apis mellifera OX=7460 GN=LOC551180 PE=3 SV=1		0	FALSE	313.244	45	37	407	36	928	108	6.76	164.52	8.65	101.99	4.38	16.01	1.85	5.68	7.06	132.11	3.12	6.05	5.94	12.66	343.58	10.74	86.71	9.17	49.64	2.63	2.96	31	1	28	3	6	1	1	4	27	1	1	1	8	26
FALSE	High	Master Protein	A0A087ZTK0	Aminopeptidase OS=Apis mellifera OX=7460 GN=Psa PE=3 SV=1		0	FALSE	152.415	40	25	90	25	867	98.5	5.54	77	11.14				14.49					5.88	7.11	14.78	36.84		74.33			5.68		16	4				5					2	3	9	9
FALSE	High	Master Protein	A0A087ZNZ2	Aminotran_1_2 domain-containing protein OS=Apis mellifera OX=7460 GN=LOC409196 PE=4 SV=1		0	FALSE	300.446	77	38	668	37	543	60.8	8.32	199.38	94.28	12.71	41.14	34.01	133	121.09	63.25	21.69	6.78	157.99	50.87	55.64	299.9	0	179.67	37.51	72.56	157.11	23.11	30	17	10	15	10	23	24	17	7	3	17	17	21	23
FALSE	High	Master Protein	A0A088A6R0	Aminotran_1_2 domain-containing protein OS=Apis mellifera OX=7460 PE=4 SV=1		0	FALSE	6.526	21	2	3	2	141	16.6	5.63	2.57						1.77							0							1						1							1
FALSE	High	Master Protein	A0A087ZMX6	Aminotran_5 domain-containing protein OS=Apis mellifera OX=7460 GN=LOC410039 PE=3 SV=1		0	FALSE	14.345	13	4	6	4	448	49.9	8.24	3.21										0	0		3.13							2										1	2		1
FALSE	High	Master Protein	A0A088A721	Ammonium_transp domain-containing protein OS=Apis mellifera OX=7460 PE=3 SV=1		0	FALSE	18.586	20	3	4	1	324	34.7	7.09											3.32			5.25			1.76														1			1
FALSE	High	Master Protein	A0A088A084	AMP deaminase OS=Apis mellifera OX=7460 GN=LOC409444 PE=3 SV=1		0	FALSE	12.053	7	4	7	4	703	81.2	6.29						0	3.74					0		0				0								1	2					1		1
FALSE	High	Master Protein	A0A088A2C1	AMP_N domain-containing protein OS=Apis mellifera OX=7460 PE=4 SV=1		0	FALSE	13.678	18	2	4	2	160	18.5	5.19	6.89															5.5					2
FALSE	High	Master Protein	A0A088AJ72	AMP-binding domain-containing protein OS=Apis mellifera OX=7460 GN=bgm PE=4 SV=1		0	FALSE	11.984	8	3	4	3	687	76.9	7.36	4.33													0		0		0			1													1
FALSE	High	Master Protein	A0A087ZV52	AMP-binding domain-containing protein OS=Apis mellifera OX=7460 GN=LOC409515 PE=4 SV=1		0	FALSE	176.061	44	25	224	25	715	80.8	8.32	49.26	23.45	13.07	4.31	22.58	21.13	47.87	27.37	0	2.39	29.08	13.32	20.54	45.96	0	26.5	37.08	35.96	21.23	3.6	15	13	8	3	9	7	15	10	2	4	8	6	8	11
FALSE	High	Master Protein	A0A087ZYX1	AMPKBI domain-containing protein OS=Apis mellifera OX=7460 GN=alc PE=4 SV=1		0	FALSE	24.953	12	2	25	2	283	31.8	7.25	8.73	2.64		3.1	8.69	3.24	8.43			0	0	0				2.57	5.55		6.93	2.97	2	1		2	2	1	2			1	1	1
FALSE	High	Master Protein	A0A087ZNG8	ANAPC4_WD40 domain-containing protein OS=Apis mellifera OX=7460 GN=100576146 PE=4 SV=1		0	FALSE	6.952	3	1	1	1	527	59.3	6.68														3.13																				1
FALSE	High	Master Protein	A0A2G4P5E8	Anhydro-N-acetylmuramic acid kinase OS=Serratia marcescens OX=615 GN=anmK PE=3 SV=1		0.009	FALSE	2.978	5	1	42	1	373	39.6	5.5	3.7	0	0		1.73	1.67	1.61	0	0	1.81						0		3.36	0	0	1	1	1		1	1	1	1	1	1
FALSE	High	Master Protein	A0A087ZTR6	Anion exchange protein OS=Apis mellifera OX=7460 GN=LOC409792 PE=3 SV=1		0	FALSE	5.249	1	1	1	1	1281	142.7	6.46													1.93																				1
FALSE	High	Master Protein	A0A088AU50	Anion exchange protein OS=Apis mellifera OX=7460 PE=3 SV=1		0	FALSE	43.147	9	7	15	7	1171	130.8	6.48		2.95	1.74				2.68				2.8			9.89			2.94	2.8				1	1				3				2			2
FALSE	High	Master Protein	A0A088APR9	ANK_REP_REGION domain-containing protein OS=Apis mellifera OX=7460 GN=LOC551350 PE=4 SV=1		0	FALSE	12.444	28	2	3	2	124	13.8	5.3												2.11	1.87	3.55																		1	1	1
FALSE	High	Master Protein	A0A088AB36	ANK_REP_REGION domain-containing protein OS=Apis mellifera OX=7460 GN=LOC551548 PE=4 SV=1		0	FALSE	5.802	3	1	1	1	616	68.7	6.77	2.5																				1
FALSE	High	Master Protein	A0A088AJG3	ANK_REP_REGION domain-containing protein OS=Apis mellifera OX=7460 GN=LOC551954 PE=4 SV=1		0	FALSE	13.556	19	2	4	2	226	24.8	5.9	4.49															4.34					1
FALSE	High	Master Protein	A0A088ANW7	ANK_REP_REGION domain-containing protein OS=Apis mellifera OX=7460 PE=3 SV=1		0	FALSE	49.607	17	9	19	9	628	71.5	6.11	18.95					20.68					2.84		6.18						2.7		4					6					1		3
FALSE	High	Master Protein	A0A088AN05	ANK_REP_REGION domain-containing protein OS=Apis mellifera OX=7460 PE=4 SV=1		0.006	FALSE	3.263	1	1	1	1	3073	332.9	6.8	2.65																				1
FALSE	High	Master Protein	A0A088AVK8	ANK_REP_REGION domain-containing protein OS=Apis mellifera OX=7460 PE=4 SV=1		0	FALSE	5.856	4	1	1	1	273	29.2	6.74														2.83																				1
FALSE	High	Master Protein	A0A088AHN6	ANK_REP_REGION domain-containing protein OS=Apis mellifera OX=7460 PE=4 SV=1		0	FALSE	12.93	2	4	8	4	2145	240	7.11	4.33					1.92		1.78								2.38		6.81			2					1		1
FALSE	High	Master Protein	A0A088A1W4	Annexin OS=Apis mellifera OX=7460 GN=LOC409068 PE=3 SV=1		0	FALSE	148.152	39	19	131	19	508	56.5	5.55	69.82	2.02		3.41	9.29	20.6	0	0	0	0	16.45	9.91	8.59	92.79		47.52	3.38	0	14.21	4.96	15	1		3	4	10	1	1	2	1	5	4	6	8
FALSE	High	Master Protein	A0A088AJH1	Annexin OS=Apis mellifera OX=7460 GN=LOC409533 PE=3 SV=1		0	FALSE	286.513	78	26	358	25	323	35.9	4.74	220.68	25.01	4.41	40.13	19.93	63.41	39.37	12.97	13.3	15.2	17.69	67.06	105.98	88.09	0	184.11	8.01	12.45	50.78	12.92	23	6	2	12	4	12	9	4	5	4	6	15	17	14
FALSE	High	Master Protein	A0A087ZR92	Annexin OS=Apis mellifera OX=7460 PE=3 SV=1		0	FALSE	164.542	63	18	177	17	323	35.7	5.48	68.63	7.24	0	15	11.22	11.6	4.57	1.71	0	0	7.21	14.55	47.72	135.95		44.39	0	0	16.09	1.76	14	6	1	9	5	5	2	1	1	1	3	9	14	12
FALSE	High	Master Protein	Q8I6X7	Antennal-specific protein 3c OS=Apis mellifera OX=7460 GN=ASP3c PE=2 SV=1		0	FALSE	80.602	62	11	419	11	130	14.9	7.68	2.28	53.85	24.6	51.94	8.32	19.27	38.21	15.64	19.28	14.89	29.51	266.53	58.63	64.03	5.59	9.88	24.44	11.86	24.01	11.78	2	9	7	8	5	5	7	7	4	5	4	6	4	4
FALSE	High	Master Protein	A0A088AH86	AP complex subunit beta OS=Apis mellifera OX=7460 PE=3 SV=1		0	FALSE	82.222	28	17	45	17	918	101.3	5.27	7.12	6.79		7.39		2.88	5.78			2.2	6.17	0	0	19.51		7.79	3.95	4.97	7.82	3.88	3	4		5		1	3			1	3	2	1	6
FALSE	High	Master Protein	A0A088AG11	AP complex subunit sigma OS=Apis mellifera OX=7460 PE=3 SV=1		0.007	FALSE	3.163	8	1	5	1	111	13.3	8.98	2.52			1.91					2.05					1.9		2.29					1			1					1					1
FALSE	High	Master Protein	A0A088A893	AP_endonuc_2 domain-containing protein OS=Apis mellifera OX=7460 PE=4 SV=1		0	FALSE	11.772	25	2	11	2	156	18	6.38	2.72			2.3	2.56	0		0	2.57	0				3.4		2.28			2.3		1			1	1	1		1	1	1				1
FALSE	High	Master Protein	A0A088ACY2	AP-1 complex subunit gamma OS=Apis mellifera OX=7460 PE=3 SV=1		0	FALSE	11.105	4	3	10	3	809	90.2	7.96	8.97			0				1.71	0	1.65						2.05		3.29			3			1				1	1	1
FALSE	High	Master Protein	A0A088APJ2	AP-2 complex subunit alpha OS=Apis mellifera OX=7460 GN=alpha-Adaptin PE=3 SV=1		0	FALSE	31.148	12	8	22	8	937	104.9	7.21	5.2			1.77		0	2.09	3.86		1.94	1.84	2.25	1.66	2.76		7.31			3.68	1.66	2			1		1	2	2		1	1	2	4	1
FALSE	High	Master Protein	A0A088A8Q2	AP-3 complex subunit beta OS=Apis mellifera OX=7460 GN=LOC552064 PE=3 SV=1		0.005	FALSE	3.663	1	1	1	1	1049	117.6	6.32																0
FALSE	High	Master Protein	P01500	Apamin OS=Apis mellifera OX=7460 PE=1 SV=2		0	FALSE	6.91	20	1	4	1	46	5.2	8.4					1.9					6.33															1					1
FALSE	High	Master Protein	A0A088ANC5	APD-3-like protein; Apidermin 1-like protein; Apidermin 3-like protein OS=Apis mellifera OX=7460 GN=apd-3 PE=4 SV=1		0	FALSE	47.334	27	3	56	3	275	24.2	7.56	4.62			2.36	14.47			20.99	3.11	20.07	2.45		106.51	3.58	1.83	2.77			2.38	3.18	1			1	2			3	1	3	1		2	1
FALSE	High	Master Protein	B0LUE8	Apolipophorin-III-like protein OS=Apis mellifera OX=7460 GN=A4 PE=2 SV=1		0	FALSE	32.448	49	6	26	6	193	21.3	5.66				25.63	0				2.18	4.48	8.36		3.83					2.28	3.04	4.04				5	1				2	2	3		2
FALSE	High	Master Protein	B5APR7	Apyrase OS=Apis mellifera OX=7460 PE=2 SV=1		0	FALSE	55.833	19	7	35	7	567	63.4	6.43	23.58		0		6.04	2.27		0	0	0			0	14.08		11.27		35.94	3.11	2.25	4		1		1	1		1	1	1			1	2
FALSE	High	Master Protein	A0A088AB14	Arf-GAP domain-containing protein OS=Apis mellifera OX=7460 GN=LOC409617 PE=4 SV=1		0	FALSE	11.211	5	2	2	2	545	60.6	8.38				3.16										2.82										1										1
FALSE	High	Master Protein	A0A088ARZ8	Arginine kinase OS=Apis mellifera OX=7460 PE=3 SV=1		0	FALSE	584.25	81	35	2281	35	383	43.4	6.55	517.23	265.08	91.79	180.25	131.9	244.68	255.23	161.33	123.48	98.65	511.42	423.51	723.84	1138.3	41.64	402.78	117.68	258.97	274.78	104.94	30	23	22	24	20	27	26	23	21	20	22	29	26	30
FALSE	High	Master Protein	A0A0M5M048	Argininosuccinate synthase OS=Serratia marcescens OX=615 GN=argG PE=3 SV=1		0.006	FALSE	3.288	4	2	2	2	406	45	5.54			1.64																				2
FALSE	High	Master Protein	A0A088A113	ARID domain-containing protein OS=Apis mellifera OX=7460 GN=osa PE=4 SV=1		0.002	FALSE	4.323	1	1	1	1	2103	228.5	6.86	4.05																				1
FALSE	High	Master Protein	A0A088AM48	Arp2/3 complex 34 kDa subunit OS=Apis mellifera OX=7460 GN=Arc-p34 PE=3 SV=1		0	FALSE	20.072	16	4	21	4	306	35.8	7.68	4.81	2.28		2.2	0	3.06	2.63		2.46				2.69	2.84		2.43	2.73		2.74	0	3	2		1	1	2	2		1				1	2
FALSE	High	Master Protein	A0A087ZUT4	Arrestin_C domain-containing protein OS=Apis mellifera OX=7460 GN=409006 PE=4 SV=1		0	FALSE	16.155	9	3	6	3	492	54.2	5.62	5.46															4.06			6.18		2
FALSE	High	Master Protein	A0A088AH00	Arrestin_C domain-containing protein OS=Apis mellifera OX=7460 GN=ArrL2 PE=4 SV=1		0	FALSE	13.161	8	2	5	2	338	37.7	8.81	2.83					2.52	2.68										5.25				1					1	1
FALSE	High	Master Protein	A0A088A4B2	Aspartate aminotransferase OS=Apis mellifera OX=7460 GN=Got2 PE=4 SV=1		0	FALSE	265.102	62	26	457	26	429	48	9.22	138.9	106.6	4.82	41.56	11.38	59.81	143.03	50.07	15.53	1.65	82.45	62.4	78.03	136.91		76.82	123.61	121.28	49.44	34.29	16	17	5	14	4	12	18	11	7	1	15	12	13	17
FALSE	High	Master Protein	A0A088ASL4	Aspartate aminotransferase OS=Apis mellifera OX=7460 PE=4 SV=1		0	FALSE	168.146	79	19	273	19	365	41.5	7.24	56.98	57.26	9.5	42	42.28	25.5	101.64	41.52	29.62	28.58	4.48	34.72	23.44	55.26	0	20.36	37.34	43.82	33.02	18.44	9	12	4	11	8	6	14	10	8	8	2	9	7	9
FALSE	High	Master Protein	A0A343ITD7	ATP synthase subunit a OS=Apis mellifera syriaca OX=279977 PE=4 SV=1		0	FALSE	7.635	8	2	33	2	226	26.6	8.94		6.37	3.93	3.76	3.73		7.64	5.55	1.86								6.04	2.38	4.7	4.5		2	2	2	1		2	2	1
FALSE	High	Master Protein	A0A087ZQI5	ATP synthase subunit alpha OS=Apis mellifera OX=7460 GN=Atp5a1 PE=3 SV=1		0	FALSE	446.845	74	35	2518	34	547	59.5	8.9	364.24	283.27	282.73	215.07	290.95	301.09	312.66	292.07	214	204.76	570.32	564.07	562.66	1281.48	148.91	305.3	273.36	332.78	248.32	225.38	28	28	29	25	26	26	26	27	24	27	20	22	21	25
FALSE	High	Master Protein	C5CA76	ATP synthase subunit alpha OS=Micrococcus luteus (strain ATCC 4698 / DSM 20030 / JCM 1464 / NBRC 3333 / NCIMB 9278 / NCTC 2665 / VKM Ac-2230) OX=465515 GN=atpA PE=3 SV=1		0	FALSE	20.932	5	2	249	1	555	60.5	5.35	21.03	15.48	20.66	12.05	12.63	13.9	17.88	20.18	14.97	12.28	52.18	106.91	82.77	226.69	15.63	13.79	15.52	15.58	15	13.19	1	1	1	1	1	1	1	1	1	1	2	1	1	1
FALSE	High	Master Protein	A0A093SBP3	ATP synthase subunit alpha OS=Pectobacterium carotovorum subsp. carotovorum OX=555 GN=atpA PE=3 SV=1		0	FALSE	19.18	4	2	249	1	513	55.3	5.69	21.03	15.48	20.66	12.05	12.63	13.9	17.88	20.18	14.97	12.28	50.5	106.91	82.77	226.69	15.63	13.79	15.52	15.58	16.73	13.19	1	1	1	1	1	1	1	1	1	1	1	1	1	1
FALSE	High	Master Protein	A0A088AMB8	ATP synthase subunit beta OS=Apis mellifera OX=7460 GN=Atp5b PE=3 SV=1		0	FALSE	807.879	82	33	4233	32	516	55.1	5.41	770.85	461.99	480.49	465.44	604.97	625.71	615.55	512.1	260.41	406.25	1403.62	1216.6	862.56	2206.1	221.71	576.02	487.74	675.04	430.24	439.33	31	30	29	28	30	31	31	30	27	29	22	29	25	29
FALSE	High	Master Protein	A0A087ENJ2	ATP synthase subunit beta OS=Lactobacillus kunkeei OX=148814 GN=atpD PE=3 SV=1		0	FALSE	22.154	6	2	115	2	468	50.9	4.75	24.34	23.44	15.34	17.47	18.58	20.92	22.54	19.39	11.18	17.56						21.6	20.64	20.54	20.32	21.33	2	2	2	2	2	2	2	2	2	2
FALSE	High	Master Protein	C5CA78	ATP synthase subunit beta OS=Micrococcus luteus (strain ATCC 4698 / DSM 20030 / JCM 1464 / NBRC 3333 / NCIMB 9278 / NCTC 2665 / VKM Ac-2230) OX=465515 GN=atpD PE=3 SV=1		0	FALSE	18.487	5	2	257	1	485	52.4	4.81	13.46	11.47	12.66	9.69	13.71	12.98	12.2	11.93	5.43	11.85	136.45	103.08	61.03	118.77	8.41	13.27	8.23	13.94	8.59	11.33	1	1	1	1	1	1	1	1	1	1	1	1	1	1
FALSE	High	Master Protein	A0A093SJJ8	ATP synthase subunit beta OS=Pectobacterium carotovorum subsp. carotovorum OX=555 GN=atpD PE=3 SV=1		0	FALSE	20.016	10	3	6	3	460	50.2	5			3.94																3.33	6.55			2
FALSE	High	Master Protein	A0A087ZS51	ATP synthase subunit d, mitochondrial OS=Apis mellifera OX=7460 GN=ATPsyn-d PE=3 SV=1		0	FALSE	204.364	79	19	832	19	174	20.3	5.12	137.78	100.42	114.32	76.56	99.13	91.92	133.81	118.47	90.51	62.71	113.77	81.78	171.79	180.7	48.05	105.88	105.93	126.74	77.91	69.04	14	13	15	14	11	12	15	15	13	9	11	12	12	12
FALSE	High	Master Protein	A0A088ACY7	ATP synthase subunit gamma OS=Apis mellifera OX=7460 GN=Atp5c1 PE=3 SV=1		0	FALSE	170.687	63	19	800	19	296	32.8	9.42	151.64	101.29	112.59	77.28	90.81	91.43	110.81	99.07	69.47	60.96	153.45	131.16	201.5	162.63	40.45	100.04	108.74	115.95	63.19	74.01	14	12	16	11	12	13	14	13	11	11	9	9	8	10
FALSE	High	Master Protein	A0A088A2G0	ATP synthase subunit OS=Apis mellifera OX=7460 PE=3 SV=1		0	FALSE	50.623	70	9	329	9	107	12.2	9.83	45.41	27.73	41.98	25.14	26.06	24.17	30.94	27.64	26.88	7.98	27.72	13.3	29.04	33.74	10.79	22.64	22.22	28.5	29.42	19.47	7	7	7	6	7	7	6	7	5	4	5	5	6	5
FALSE	High	Master Protein	A0A087ZY48	ATPase ASNA1 homolog OS=Apis mellifera OX=7460 GN=LOC409264 PE=3 SV=1		0	FALSE	43.494	34	8	14	8	339	38.3	5.29	13.21											2.14	1.62	5.87		3.45		2.78	6.33		3											2	1	2
FALSE	High	Master Protein	A0A088ARD2	ATP-citrate synthase OS=Apis mellifera OX=7460 GN=ATPCL PE=3 SV=1		0	FALSE	460.035	65	53	571	53	1086	120	7.74	245.53	54.64	6	35.73	23.52	113.82	131.19	22.51	56.65	7.23	17.94	23.57	30.35	176.46		243.91	77.77	79.95	140.39	13.75	40	19	3	18	9	28	32	12	21	4	8	10	10	29
FALSE	High	Master Protein	A0A087ZNI5	ATP-dependent (S)-NAD(P)H-hydrate dehydratase OS=Apis mellifera OX=7460 PE=3 SV=1		0	FALSE	12.321	11	2	5	2	350	38.4	9.28		0		0		2.5	2.31															1		1		1	1
FALSE	High	Master Protein	A0A087ZVI9	ATP-dependent Clp protease proteolytic subunit OS=Apis mellifera OX=7460 GN=LOC409011 PE=3 SV=1		0	FALSE	21.63	17	2	11	2	237	26.3	8.63	3.87			2.39							3.48	0		9.18				3.01	2.22	0	1			1							1	1		1
FALSE	High	Master Protein	A0A087ZZ68	ATP-grasp_2 domain-containing protein OS=Apis mellifera OX=7460 PE=4 SV=1		0	FALSE	115.399	58	15	110	12	322	36.1	5.66	49.14	0		3.85		19.63	4.02	6.67	2.14		18.2	15.07	0	27.8		51.2	8.47	16.58	22.68	2.16	11	2		3		7	4	4	1		5	5	2	7
FALSE	High	Master Protein	A0A088AHV3	ATP-synt_DE_N domain-containing protein OS=Apis mellifera OX=7460 GN=Atp5d PE=3 SV=1		0	FALSE	100.74	77	8	258	8	161	17.6	5.17	45.31	61.75	21.11	35.76	45.01	30.68	83.16	53.59	12.42	35.81	15.61	77.2	8.53	36.25	4.88	32.48	64.72	50.08	19.72	18.61	6	7	5	6	6	5	8	7	3	5	2	5	3	2
FALSE	High	Master Protein	A0A087ZQ06	B3_4 domain-containing protein OS=Apis mellifera OX=7460 GN=LOC411407 PE=4 SV=1		0	FALSE	7.797	4	2	6	2	531	60.2	8.29	5.45													5.35		1.89		1.7			2													1
FALSE	High	Master Protein	A0A088APR0	Bac_surface_Ag domain-containing protein OS=Apis mellifera OX=7460 GN=LOC413450 PE=4 SV=1		0	FALSE	90.126	36	14	153	14	483	54	9.09	24.56	18.22	32.45	11.31	34.14	18.68	22.14	41.92	11.87	5.31	4.65	2.65	15	7.31	0	19.62	23.58	30.52	20.39	21.27	5	5	7	5	6	3	7	10	6	3	2	2	5	3
FALSE	High	Master Protein	A0A088AEB3	Battenin OS=Apis mellifera OX=7460 GN=cln3 PE=3 SV=1		0.002	FALSE	4.457	5	1	2	1	425	47.1	7.87																2.87		2.86
FALSE	High	Master Protein	A0A088AJN6	Beta-glucuronidase OS=Apis mellifera OX=7460 GN=LOC409814 PE=3 SV=1		0	FALSE	79.041	26	14	59	14	669	76.9	6.11	11.08	15.64	3.75	1.79	7.18	8.83	22.9	2.46		2	5.21	2.06	2.13	8.93		3.4	21.13	5.44	6.22	7.94	4	8	2	2	3	3	8	2		1	2	1	1	3
FALSE	High	Master Protein	A0A087ZUU5	Beta-hexosaminidase OS=Apis mellifera OX=7460 PE=3 SV=1		0	FALSE	110.856	41	15	108	15	541	61.3	6.99	34.42	14.64	2.1	9.9	13	29.44	16.03	2.44	9.78	7.03	3.02			34.33		35.47	8.87	12.47	34.11	4.8	9	8	2	6	5	6	6	2	5	4	1			9
FALSE	High	Master Protein	A0A088A1L4	BP28CT domain-containing protein OS=Apis mellifera OX=7460 GN=HEATR1 PE=4 SV=1		0.005	FALSE	3.831	1	2	2	2	2057	235.3	6.49								0										2.79										1
FALSE	High	Master Protein	A0A088A206	BRCT domain-containing protein OS=Apis mellifera OX=7460 GN=100576717 PE=4 SV=1		0	FALSE	23.43	4	4	4	4	1389	156.3	5.31														10.33		1.65																		3
FALSE	High	Master Protein	A0A088AD36	Brix domain-containing protein OS=Apis mellifera OX=7460 PE=4 SV=1		0.006	FALSE	3.389	5	1	1	1	344	40.9	9.91							0																				1
FALSE	High	Master Protein	A0A088ANI4	BRO1 domain-containing protein OS=Apis mellifera OX=7460 GN=ALiX PE=4 SV=1		0	FALSE	149.541	38	24	64	24	816	91.6	5.77	49.71			4.09	3.28	4.9	0				12.16	3.62	12.48	27.65		27.9	0	0	2.22	0	14			2	1	2	1				4	3	5	7
FALSE	High	Master Protein	A0A088ALI7	BSD domain-containing protein OS=Apis mellifera OX=7460 GN=726924 PE=4 SV=1		0	FALSE	6.756	5	2	4	2	438	47.4	4.56				5.17						2.06														2						1
FALSE	High	Master Protein	A0A088ABD2	BTB domain-containing protein OS=Apis mellifera OX=7460 PE=4 SV=1		0	FALSE	8.038	6	2	15	2	429	48.7	9.17	2.4	1.87		2.02	2.65		2.25		2.05	2.24				2.25		2.82	2.3	2.86	2.85	4.69	1	1		1	1		1		1	1				1
FALSE	High	Master Protein	A0A088AFW6	BTB domain-containing protein OS=Apis mellifera OX=7460 PE=4 SV=1		0.001	FALSE	4.811	8	2	4	2	245	28.3	5.47							0							0				0									1							1
FALSE	High	Master Protein	A0A088AWA1	C2 domain-containing protein OS=Apis mellifera OX=7460 GN=LOC724498 PE=4 SV=1		0	FALSE	43.664	27	9	26	9	409	46	9.61			0	12.49	7.1	5.37				3.49	4.25			10.45		3.36		4.3	5.41	0			1	7	3	2				2	2			3
FALSE	High	Master Protein	A0A087ZTJ1	C2H2-type domain-containing protein OS=Apis mellifera OX=7460 GN=LOC408565 PE=4 SV=1		0	FALSE	12.745	3	2	8	2	761	85.7	6.71	7.63				0	0	0									2.09	0				2				1	1	1
FALSE	High	Master Protein	A0A088A6V0	C2H2-type domain-containing protein OS=Apis mellifera OX=7460 PE=4 SV=1		0.002	FALSE	4.21	8	2	10	2	282	30	9.83	2.02				0		0									0	0		0		1				1		1
FALSE	High	Master Protein	A0A088AFX4	C3H1-type domain-containing protein OS=Apis mellifera OX=7460 PE=4 SV=1		0.003	FALSE	4.05	14	1	1	1	66	7.6	7.78														1.8																				1
FALSE	High	Master Protein	A0A087ZQ49	CAAX prenyl protease OS=Apis mellifera OX=7460 GN=LOC551466 PE=3 SV=1		0	FALSE	37.077	22	9	27	9	442	52.1	7.77	7.59	2.02	0	0		4.23	10.3	0			1.97		2.03	4.26		8.13	7.45	5.3	6.02		3	2	1	1		1	2	1			1		2	2
FALSE	High	Master Protein	A0A088AAI1	Calcium load-activated calcium channel OS=Apis mellifera OX=7460 GN=LOC552501 PE=3 SV=1		0	FALSE	16.654	20	3	32	3	183	21.1	9.6	4.53	8.33	3.3	2.86	8.04	8.15	7.97	5.68	5.62	5.78				5.46		7.39	7.87	7.7	7.72	6.67	1	1	1	1	1	1	1	1	1	1				2
FALSE	High	Master Protein	A0A088ACZ9	Calcium-transporting ATPase OS=Apis mellifera OX=7460 GN=LOC410371 PE=3 SV=1		0	FALSE	513.212	50	49	1271	49	1002	110	5.64	292.94	189.48	105.61	74.51	214.61	197.09	231.27	70.34	91.63	130.61	277.74	178.78	85.86	224.71	26.17	161.95	237.47	219.64	228.58	56.18	38	36	28	26	33	31	36	21	23	29	30	32	20	25
FALSE	High	Master Protein	A0A087ZYD1	Calcium-transporting ATPase OS=Apis mellifera OX=7460 PE=3 SV=1		0	FALSE	316.839	40	36	350	36	1080	119.2	8.24	66.68	20.85	23.99	9.99	50.14	60.93	55.56	31.53	13.1	14.73	68.08	48.35	21.6	93.84	7.08	66.8	44.77	111.9	75.6	15.59	17	7	10	5	15	15	16	14	6	7	19	18	10	17
FALSE	High	Master Protein	A0A088AF78	Calponin OS=Apis mellifera OX=7460 GN=LOC408532 PE=3 SV=1		0	FALSE	69.994	68	10	107	10	169	19.1	8.4	18.13	15.72	2.79	44.12	5.48	22.94	6.69	5.09	5	8.66	13.84	19.13	1.89	9.91		30.97	3.5		17.74	11.07	5	4	2	9	2	6	3	2	2	4	3	4	1	3
FALSE	High	Master Protein	A0A088AF68	Calponin OS=Apis mellifera OX=7460 PE=3 SV=1		0	FALSE	7.576	11	1	2	1	153	17.1	9.22	3.14					1.89															1					1
FALSE	High	Master Protein	A0A087ZYU9	Calponin-homology (CH) domain-containing protein OS=Apis mellifera OX=7460 PE=4 SV=1		0	FALSE	11.086	18	2	6	2	184	21.6	8.92		5.28		0			3.87										6.28					2		1			1
FALSE	High	Master Protein	A0A087ZYV0	Calponin-homology (CH) domain-containing protein OS=Apis mellifera OX=7460 PE=4 SV=1		0	FALSE	129.018	25	22	59	22	1316	152.5	6.77	13.47	11.22		2.57	0	9.21	16.43				21.32	2.39	2.62	23.32	1.93	1.93	15.42	2.5	0		5	6		2	1	4	7				9	1	4	6
FALSE	High	Master Protein	A0A087ZZA9	Calponin-homology (CH) domain-containing protein OS=Apis mellifera OX=7460 PE=4 SV=1		0	FALSE	23.218	20	3	48	2	158	18.2	9.99	10.5	0	2.86	6.28	10.73	5.86	0	2.9	10.06	4.61		0		14.24	4.58	5.96	5.42	7.44	2.71	4.97	2	1	3	3	2	2	1	2	3	2		1		2
FALSE	High	Master Protein	A0A088AIY0	Calponin-homology (CH) domain-containing protein OS=Apis mellifera OX=7460 PE=4 SV=1		0	FALSE	30.528	2	4	15	4	1514	172.3	7.97	14.2			0		15.95										4.19			9.65		3			1		3
FALSE	High	Master Protein	A0A087ZZA1	Calponin-homology (CH) domain-containing protein OS=Apis mellifera OX=7460 PE=4 SV=1		0.006	FALSE	3.235	6	1	2	1	232	26.2	5.26	1.8																0				1
FALSE	High	Master Protein	A0A087ZP00	Calreticulin OS=Apis mellifera OX=7460 GN=Crc PE=3 SV=1		0	FALSE	187.064	56	20	189	20	403	47.1	4.6	102.47	32.16	2.3	5.7	3.97	25.83	57.39	2.86	3.25	2.79	23.58	35.39	12.83	91.13		78.1	14.8	15.96	15.53		17	7	1	3	1	5	10	1	1	1	7	8	7	13
FALSE	High	Master Protein	Q6ZXJ1	cAMP-dependent protein kinase type II regulatory chain OS=Apis mellifera carnica OX=88217 GN=pkar2 PE=2 SV=1		0	FALSE	96.449	45	11	76	11	383	43.8	5	23.99	14.51		11.95		15.98	22.95	3.77	1.77	1.68	11.9	7.28	1.85	33.66		10.51	20.03	15.61	7.68	4.6	5	5		6		4	5	2	1	1	6	3	1	7
FALSE	High	Master Protein	A0A088A001	CAP-Gly domain-containing protein OS=Apis mellifera OX=7460 GN=LOC726139 PE=4 SV=1		0.002	FALSE	4.301	5	1	1	1	244	28.2	5.52																2.38
FALSE	High	Master Protein	A0A088AEZ5	CAP-Gly domain-containing protein OS=Apis mellifera OX=7460 PE=4 SV=1		0	FALSE	18.691	5	4	5	4	1266	142.1	6.01	5.59													2.31		2.74					3													1
FALSE	High	Master Protein	A0A088AUR2	Caprin-1_dimer domain-containing protein OS=Apis mellifera OX=7460 GN=LOC409086 PE=4 SV=1		0	FALSE	14.348	3	2	6	2	668	74.7	5.74	6.47											2.17		2.53		5.72					1											1		1
FALSE	High	Master Protein	Q76LA5	Carboxylic ester hydrolase OS=Apis mellifera OX=7460 GN=est PE=2 SV=1		0	FALSE	160.551	44	18	79	18	567	63.9	6.55	31.59					4.22			5.98					28.35		107.58		7.52	20.94		10					3			3					6
FALSE	High	Master Protein	A0A088A7H8	Carboxylic ester hydrolase OS=Apis mellifera OX=7460 GN=LOC409171 PE=3 SV=1		0	FALSE	180.622	52	23	229	23	538	61.2	6.71	129.59	8.63		26.57	2.23	29.24	24.87	2.23	8.99	2.13	44.81	19.86	15.45	48.09		136.21	8.25	2.97	66.19		20	5		10	1	9	8	1	4	2	11	8	6	9
FALSE	High	Master Protein	A0A088A9C3	Carboxylic ester hydrolase OS=Apis mellifera OX=7460 GN=LOC726134 PE=3 SV=1		0	FALSE	149.175	49	22	168	22	527	58.7	7.46	116.37		2.25	9.46	34.4	20.82		24.55	11.4	19.71	6.97	3.85		16.49		71.26			25.53	13.87	22		2	7	9	7		9	5	7	3	3		6
FALSE	High	Master Protein	A0A087ZN44	Carboxypeptidase OS=Apis mellifera OX=7460 PE=3 SV=1		0	FALSE	71.688	28	9	103	9	409	46.8	8.85	29.65	11.85		8.25	13.52	14.02	17.49	8.67	6.54	4.63	2.41	2.15	8.54	11.23	1.75	20.71	14.57	14.57	29.31	8.26	7	4		4	4	3	6	4	2	1	1	2	2	2
FALSE	High	Master Protein	A0A088A7X0	Carn_acyltransf domain-containing protein OS=Apis mellifera OX=7460 PE=3 SV=1		0	FALSE	101.496	33	17	66	17	662	76.8	8.72	29.77	4.4	11.3			9.39	5.43	5.69	4.49		4.49	2.14	3.93	11.58		22.71	6.63	19.06	5.36	2.31	6	2	5			3	4	4	3		2	2	4	4
FALSE	High	Master Protein	A0A088AP68	Carrier domain-containing protein OS=Apis mellifera OX=7460 GN=LOC412815 PE=4 SV=1		0	FALSE	359.341	31	55	265	55	2388	264.3	6.52	204.9	14.36		11.93		12.23	33.05	1.62	1.73	0	24.88	14.5	2.87	71.64		154.81	26.71	19.38	54.77	1.68	38	9		6		5	15	3	2	1	9	9	2	17
FALSE	High	Master Protein	A0A088ACC2	Casein kinase II subunit beta OS=Apis mellifera OX=7460 GN=CkIIbeta PE=3 SV=1		0	FALSE	34.515	33	6	34	6	227	26.2	6.09	20.71				4.97	6.25	10.09	3.69	2.05	2.54	3.12	0		1.95		12.26	8.04	7.12	5.63	6.27	4				2	2	3	1	1	1	1	1		2
FALSE	High	Master Protein	Q6S974	Catalase (Fragment) OS=Apis mellifera ligustica OX=7469 PE=2 SV=1		0	FALSE	37.232	46	5	94	1	182	21.4	6.89	26.4	1.67	5.6	7.53	13.85	18.56	12.69	20.12	0	3.15			3.58	4.28		12.05	9.36	24.69	10.75	12.14	3	2	4	4	2	3	2	4	2	2			1	2
FALSE	High	Master Protein	A0A087ZRK9	Catalase OS=Apis mellifera OX=7460 PE=3 SV=1		0	FALSE	169.73	58	19	358	15	489	55.3	8.28	112.89	45.92	43.51	57.61	61.25	54.35	75.73	85.9	20.32	28.73	10.45	7.59	22.82	28.1	0	44.98	50.23	83.87	41.93	51.19	16	11	13	16	12	12	14	17	9	11	3	4	8	8
FALSE	High	Master Protein	A0A0F9YN99	Cdc48-like aaa atpase OS=Nosema ceranae OX=40302 GN=AAJ76_1040006841 PE=3 SV=1		0	FALSE	12.459	4	2	5	1	708	78.6	5.72							0	2.65						4.23		0			2.54								1	1						1
FALSE	High	Master Protein	A0A088AC75	CDP-diacylglycerol--glycerol-3-phosphate 3-phosphatidyltransferase OS=Apis mellifera OX=7460 GN=LOC413879 PE=3 SV=1		0.005	FALSE	3.539	4	1	2	1	515	59.3	8.38																0		2.1
FALSE	High	Master Protein	A0A087ZPQ1	CDP-diacylglycerol--inositol 3-phosphatidyltransferase OS=Apis mellifera OX=7460 GN=LOC411408 PE=3 SV=1		0.004	FALSE	3.922	5	1	2	1	217	24.9	8		2.44												3.17								1												1
FALSE	High	Master Protein	A0A088AVK1	cGMP-dependent protein kinase OS=Apis mellifera OX=7460 GN=100576901 PE=3 SV=1		0	FALSE	184.606	45	24	242	24	723	81.7	8.78	84.12	1.94	12	11.71	14	61.29	14.14	61.23	15.01	16.28	6.91	4.14	0	44.43	2.25	52.42	2.02	85.31	27.67	31.75	17	1	8	6	5	15	6	16	7	9	5	5	1	9
FALSE	High	Master Protein	T1SGQ4	cGMP-dependent protein kinase OS=Apis mellifera OX=7460 PE=2 SV=1		0	FALSE	55.471	19	12	30	12	739	83.5	5.64	19.48		0	0		5.38		1.62						3.75		17.57		4.27	2	0	6		1	2		2		1						3
FALSE	High	Master Protein	A0A1J6XP18	Chaperone protein ClpB OS=Enterococcus faecalis OX=1351 GN=clpB PE=3 SV=1		0	FALSE	7.305	2	1	8	1	868	98	5.15			4.69													3.85			8.06	6.32			1
FALSE	High	Master Protein	V5T846	Chaperone protein DnaK OS=Bifidobacterium sp. Hma3N OX=1293831 GN=dnaK PE=2 SV=1		0	FALSE	7.081	4	2	8	1	632	67.4	4.88	5.59					2.37	2.38									2.44	2.2	2.41	2.42		2					1	1
FALSE	High	Master Protein	C5C822	Chaperone protein DnaK OS=Micrococcus luteus (strain ATCC 4698 / DSM 20030 / JCM 1464 / NBRC 3333 / NCIMB 9278 / NCTC 2665 / VKM Ac-2230) OX=465515 GN=dnaK PE=2 SV=1		0	FALSE	5.443	3	1	2	1	621	67.1	4.74	3.49					2.53															1					1
FALSE	High	Master Protein	A0A221H3Y0	Chaperone protein DnaK OS=Serratia marcescens OX=615 GN=dnaK PE=2 SV=1		0	FALSE	38.603	12	5	32	4	637	69	4.97	3.5		11.34			3.02			2.17		37.09	4.58	2.85	4.01	1.65	5.07	3.42	3.03	4.51	4	1		3			1			1		1	1	1	1
FALSE	High	Master Protein	A0A088A013	CHCH domain-containing protein OS=Apis mellifera OX=7460 GN=LOC726337 PE=4 SV=1		0	FALSE	6.012	19	2	2	2	156	17.2	4.96							0							0													1							1
FALSE	High	Master Protein	A0A088AQQ4	Chitin-binding type-2 domain-containing protein OS=Apis mellifera OX=7460 GN=724199 PE=4 SV=1		0	FALSE	5.166	5	1	38	1	201	23	5.11	4.36		16		0			1.83		0						1.71					1		1		1			1		1
FALSE	High	Master Protein	A0A088APL1	Chitin-binding type-2 domain-containing protein OS=Apis mellifera OX=7460 GN=Cht5 PE=4 SV=1		0	FALSE	35.776	19	10	11	10	605	69	6.19			12.3										4.46										8										2
FALSE	High	Master Protein	A0A088A611	Chitin-binding type-2 domain-containing protein OS=Apis mellifera OX=7460 GN=LOC413705 PE=3 SV=1		0	FALSE	163.619	49	19	308	19	508	56.1	6.95	30.2		178.75		39.33	11.61		99.55	65.77	5.38			50.96	11.41	11.96	67.69		44.18	52.14	20.6	11		19		8	5		17	16	2			11	3
FALSE	High	Master Protein	A0A088AQI9	Chitin-binding type-2 domain-containing protein OS=Apis mellifera OX=7460 GN=LOC725725 PE=4 SV=1		0	FALSE	23.865	48	3	63	3	96	10.3	4.59	11.49		5.6	0		10.63	0		15.67	2.37			53.96	28.99		19.27					2		3	2		2	1		3	1			2	3
FALSE	High	Master Protein	A0A087ZN59	CHK domain-containing protein OS=Apis mellifera OX=7460 GN=LOC408421 PE=4 SV=1		0	FALSE	228.475	55	24	563	24	401	46.5	7.75	169.18	6.67	38.34	70.9	51.7	117.99	15.66	80.15	72.96	71.91	27.6	55.9	2.18	129.79	4.07	145.56	11.89	63.6	102.82	49.13	21	3	12	17	12	18	7	21	14	18	9	14	3	19
FALSE	High	Master Protein	A0A087ZPX5	CHK domain-containing protein OS=Apis mellifera OX=7460 GN=LOC724536 PE=4 SV=1		0	FALSE	196.28	52	24	171	24	410	48	5.68	135.93		0		0	0		0	45.81					95.44		101.72	0	12.66	9.95		19		6		1	1		1	16					12
FALSE	High	Master Protein	A0A088AS57	CHK domain-containing protein OS=Apis mellifera OX=7460 GN=LOC725439 PE=4 SV=1		0	FALSE	100.572	47	17	77	17	417	48.3	6.29	35.75			14.27	3.14	18.49		2.16	8.97	4.26	6.26	1.74		16.38		56.03	3.06		10.58	2.42	11			5	1	5		1	4	2	3	2		6
FALSE	High	Master Protein	A0A088AES4	CHK domain-containing protein OS=Apis mellifera OX=7460 GN=LOC726965 PE=4 SV=1		0	FALSE	139.893	48	17	131	17	455	52	5.53	73.2			30.97	12.18	23.27		20.42		41.94	3.44	9.56		23.7	1.66	32.93		24.43	50.21	2.29	13			12	5	8		9		13	1	3		4
FALSE	High	Master Protein	A0A088A4Y1	CHK domain-containing protein OS=Apis mellifera OX=7460 PE=4 SV=1		0	FALSE	63.895	39	11	19	11	363	42	5.21	25.66													15.38		14.19					6													5
FALSE	High	Master Protein	A0A088ARW7	CHK domain-containing protein OS=Apis mellifera OX=7460 PE=4 SV=1		0	FALSE	108.727	60	18	152	18	263	30.6	5.15	47.39		0	4.38	21.41	23.6		6.56	14.66	14.37	1.8	2.18		47.75	0	56.94		14.11	42.21	9.6	10		3	5	8	8		6	7	7	1	1		10
FALSE	High	Master Protein	A0A088AQ18	CHK domain-containing protein OS=Apis mellifera OX=7460 PE=4 SV=1		0	FALSE	10.335	12	4	8	3	426	48.9	6.8	4.55		1.47		0			1.56										1.83			3		1		1			2
FALSE	High	Master Protein	A0A088AM85	Chloride channel protein OS=Apis mellifera OX=7460 GN=LOC408467 PE=3 SV=1		0	FALSE	48.201	12	8	31	8	998	111.4	8.19	4.74		0		8.33	4.61	0			1.74	4.1	0		11.2	0	7.37		11.3	1.83		3		2		4	2	1			1	2	1		2
FALSE	High	Master Protein	A0A088A776	Chloride channel protein OS=Apis mellifera OX=7460 PE=3 SV=1		0.005	FALSE	3.486	3	1	4	1	865	96.1	7.47						0										2.7	0		0							1
FALSE	High	Master Protein	A0A088A5A4	Chromo domain-containing protein OS=Apis mellifera OX=7460 GN=Chro PE=4 SV=1		0	FALSE	14.459	1	1	2	1	1076	115.1	5.6											2.16			3.95																	1			1
FALSE	High	Master Protein	P56682	Chymotrypsin inhibitor OS=Apis mellifera OX=7460 PE=1 SV=1		0	FALSE	30.838	96	4	48	4	56	6	4.73	0	4.8		8.47	0	0	16.47	2.28	0			0		2.65		11.89	2.53	2.64	4.26	2.01	1	3		3	1	1	4	1	1			1		1
FALSE	High	Master Protein	A0A087ZTW4	CID domain-containing protein OS=Apis mellifera OX=7460 GN=LOC412928 PE=4 SV=1		0	FALSE	19.75	20	3	6	3	338	38.3	8.28	3.39				0	0								3.36		2.88					1				1	1								1
FALSE	High	Master Protein	A0A088AKI2	Citrate synthase OS=Apis mellifera OX=7460 GN=LOC410059 PE=3 SV=1		0	FALSE	271.939	74	27	864	27	462	51.9	9	168.26	75.93	34.87	51.54	43.39	134.04	73.99	82.2	74.49	9.93	207.48	129.41	584.26	177.07	0	153.84	68.69	115	119.75	41.17	19	14	10	10	10	16	14	17	14	3	10	14	21	11
FALSE	High	Master Protein	A0A1Q5VZC9	Class II fructose-bisphosphate aldolase OS=Serratia marcescens OX=615 GN=A8A12_20100 PE=3 SV=1		0.002	FALSE	4.445	5	1	1	1	359	39	5.88			0																				1
FALSE	High	Master Protein	A0A088AFV6	Clathrin heavy chain OS=Apis mellifera OX=7460 GN=LOC550716 PE=3 SV=1		0	FALSE	398.772	44	54	388	54	1678	192	5.94	145.86	42.46	6.33	18.2	32.19	69.57	96.76	45.97	22.61	7.83	19.39	7.99	26.78	87.91	2.31	117.47	58.41	75.61	71.49	50.42	32	17	3	12	10	15	25	16	9	5	8	4	12	18
FALSE	High	Master Protein	A0A087ZRM7	Clathrin light chain OS=Apis mellifera OX=7460 GN=Clc PE=3 SV=1		0	FALSE	15.988	15	3	8	3	209	23.5	4.79												2.11	2.77	11.06																		2	2	2
FALSE	High	Master Protein	A0A088A0J5	Cleavage and polyadenylation specificity factor subunit 5 OS=Apis mellifera OX=7460 GN=LOC552140 PE=3 SV=1		0	FALSE	34.424	37	6	15	6	228	26.1	8.85	15.16	7.16					0					0		4.43		6.15	1.79				3	3					1					1		2
FALSE	High	Master Protein	A0A088APW1	Clustered mitochondria protein homolog OS=Apis mellifera OX=7460 GN=LOC552519 PE=3 SV=1		0	FALSE	9.768	3	3	5	3	1410	159.7	6.61	4.99															1.95					3
FALSE	High	Master Protein	A0A087ZNX2	CN hydrolase domain-containing protein OS=Apis mellifera OX=7460 GN=LOC409250 PE=4 SV=1		0	FALSE	107.827	53	13	75	13	383	43.4	5.92	22.39		6.03	5.87	63.44	16		24.21	9.57	24.39		3.71		9.92	5.4	13.39		20.9		13.24	5		2	3	11	5		7	2	5		1		2
FALSE	High	Master Protein	A0A088A886	CN hydrolase domain-containing protein OS=Apis mellifera OX=7460 GN=LOC413852 PE=4 SV=1		0.005	FALSE	3.534	3	1	3	1	304	34.6	8.02	2.8					2.2										2.61					1					1
FALSE	High	Master Protein	A0A088ALI4	Coatomer subunit alpha OS=Apis mellifera OX=7460 GN=alphaCop PE=4 SV=1		0	FALSE	77.594	15	12	22	12	1214	137.9	7.36	14.24			0			2							21		17.33			0		4			2			2							7
FALSE	High	Master Protein	A0A088A977	Coatomer subunit beta OS=Apis mellifera OX=7460 GN=betaCop PE=4 SV=1		0	FALSE	94.824	24	13	33	13	949	104.7	6.07	22.19		2.06	4.96		5.15	8.4	0	1.62			2.23	2.32	19.73		18.63	2.19	2.24	0		6		1	2		2	3	1	1			1	1	4
FALSE	High	Master Protein	A0A087ZY82	Coatomer subunit beta' OS=Apis mellifera OX=7460 PE=3 SV=1		0	FALSE	32.965	9	7	15	7	899	101.3	5.96	13.2						0				4.11		0	7.2		2.5		2.48	0		4						1				2		1	2
FALSE	High	Master Protein	A0A088AGY8	Coatomer subunit delta OS=Apis mellifera OX=7460 GN=deltaCOP PE=3 SV=1		0	FALSE	52.145	27	9	27	9	515	57.8	5.62	18.29		1.65	3.8		5.3			0	0				15		5.8		2.26	2.22		6		1	2		2			1	1				5
FALSE	High	Master Protein	A0A088A207	Coatomer subunit epsilon OS=Apis mellifera OX=7460 PE=3 SV=1		0	FALSE	26.024	17	4	19	4	300	34.7	5.55	11.16			0			0				2.88	0	0	12.48		5.42			2.25	0	4			2			1				1	1	1	3
FALSE	High	Master Protein	A0A088AII7	Coatomer subunit gamma OS=Apis mellifera OX=7460 GN=gammaCop PE=3 SV=1		0	FALSE	136.762	33	17	79	17	876	96.4	5.58	65.74	0	0	5.88	0	7.52	2.57	2.03	2.32					12.82		54.5	0	4.84	24.13	2	13	2	1	4	1	3	1	2	2					4
FALSE	High	Master Protein	A0A088AQJ1	Coiled-coil_56 domain-containing protein OS=Apis mellifera OX=7460 PE=4 SV=1		0.006	FALSE	3.426	7	1	7	1	118	13.9	9.63	0	1.96		0		2.27		2.06						2.25				2.31			1	1		1		1		1						1
FALSE	High	Master Protein	A0A093SQ08	Cold-shock protein OS=Pectobacterium carotovorum subsp. carotovorum OX=555 GN=KP17_06375 PE=4 SV=1		0	FALSE	6.089	32	2	3	2	69	7.4	7.25			2.06					2.22															2					1
FALSE	High	Master Protein	A0A086FC80	Cold-shock protein OS=Serratia marcescens OX=615 GN=A8A12_02415 PE=4 SV=1		0	FALSE	9.918	42	2	5	2	69	7.4	7.24			9.32							2.02													2							1
FALSE	High	Master Protein	A0A088A3U7	Collagen IV NC1 domain-containing protein OS=Apis mellifera OX=7460 GN=LOC408551 PE=4 SV=1		0	FALSE	140.469	8	13	576	13	1833	183.2	6.98	81.09	55.56	50.8	13.66	111.58	72.55	32.77	59.04	89.96	93	137.79		27.73	107.33	34.82	61.76	55.98	72.06	58.14	74.93	9	9	8	5	12	10	7	9	9	9	4		3	5
FALSE	High	Master Protein	A0A088A3X0	Collagen IV NC1 domain-containing protein OS=Apis mellifera OX=7460 GN=LOC408552 PE=4 SV=1		0	FALSE	293.315	11	16	877	16	1929	190.9	7.09	142.74	171.99	76.24	60.9	293.62	201.86	83.44	114.6	159.91	225.92	100.37	14.76	62.74	226.07	97.91	124.78	126.54	138.5	189.05	220	13	13	6	12	13	13	10	9	9	13	10	4	4	11
FALSE	High	Master Protein	A0A088A6D6	Complex1_30kDa domain-containing protein OS=Apis mellifera OX=7460 GN=Ndufs3 PE=3 SV=1		0	FALSE	156.305	71	16	318	16	261	30.5	6.06	75.15	30.51	60.52	25.81	58.22	41.04	54.38	76.74	25.46	18.31	21.67	17.06	47.8	71.47	13.15	40.17	47.17	61.57	30.5	33.77	10	8	14	7	10	7	10	13	9	5	3	5	10	5
FALSE	High	Master Protein	A0A087ZNK1	Complex1_49kDa domain-containing protein OS=Apis mellifera OX=7460 GN=Ndufs2 PE=3 SV=1		0	FALSE	203.47	59	20	322	20	480	55.4	6.76	61.96	43.59	60.71	20.37	78.29	41.04	56.57	75.07	37.6	20.7	28.36	12.24	38.62	56.44	12.49	49.43	50.81	69.24	27.77	31.32	11	10	11	7	12	10	12	15	11	8	6	3	10	9
FALSE	High	Master Protein	A0A088ADK7	Coronin OS=Apis mellifera OX=7460 GN=LOC409316 PE=3 SV=1		0	FALSE	28.369	13	5	9	5	540	61.1	8.92	15.89					1.8			0					3.14		1.95					4					1			1					1
FALSE	High	Master Protein	A0A087ZSK9	Coronin OS=Apis mellifera OX=7460 GN=LOC412080 PE=3 SV=1		0	FALSE	7.192	3	1	1	1	494	54.8	6.54														3.38																				1
FALSE	High	Master Protein	A0A088AJN1	Corrinoid adenosyltransferase OS=Apis mellifera OX=7460 GN=LOC552180 PE=3 SV=1		0	FALSE	19.143	36	5	9	5	226	25.5	7.87	3.06										2.49		4.47	5.53		0		2.71	2.73		1										1		2	2
FALSE	High	Master Protein	A0A087ZR60	COX assembly mitochondrial protein OS=Apis mellifera OX=7460 GN=LOC552802 PE=3 SV=1		0	FALSE	7.972	22	2	4	2	123	14.3	9.06	0							0						1.91			0				1							1						1
FALSE	High	Master Protein	A0A088A2Z3	COX assembly mitochondrial protein OS=Apis mellifera OX=7460 GN=Ndufs5 PE=3 SV=1		0	FALSE	34.224	36	4	37	4	106	12.6	6.16	11.14	7.07	6.21	2.73	8.84	3.27	13.03	9.22	3.09					6.82	0	11.11	10.05	6.45	3.72	8.48	2	1	1	1	2	1	3	2	1					2
FALSE	High	Master Protein	A0A088AI62	COX6C domain-containing protein OS=Apis mellifera OX=7460 GN=Cox6c PE=4 SV=1		0	FALSE	34.837	83	7	160	7	75	8.8	9.16	8.09	15.97	15.94	10.44	10.22	13.85	19.87	25.82	9.65	6.81	8.75	5.62	11.95	11.9	0	12.67	13.88	11	11.18	11.68	4	4	4	4	4	4	5	5	4	2	3	3	4	4
FALSE	High	Master Protein	A0A088ARM6	CP-type G domain-containing protein OS=Apis mellifera OX=7460 GN=ns1 PE=4 SV=1		0	FALSE	6.853	5	2	3	2	573	65.1	9.63	0													2.57				0			1													1
FALSE	High	Master Protein	A0A088A1C5	CRAL-TRIO domain-containing protein OS=Apis mellifera OX=7460 GN=408361 PE=4 SV=1		0	FALSE	85.712	46	14	130	14	306	35.6	8.51	7.27	19.94	2.57	27.25	5.06	15.92	39.06	4.64	2.03	4.45	3.98	4.61		15.83		32.28	30.31	25.92	24.59	14.8	2	8	2	9	2	7	12	2	1	3	2	4		4
FALSE	High	Master Protein	A0A088A1P3	CRAL-TRIO domain-containing protein OS=Apis mellifera OX=7460 GN=727007 PE=4 SV=1		0	FALSE	68.755	42	12	67	12	317	37.1	7.93	12.84	5.95	2.23	16.45	6.39	5.72	12.64			2.1	10.43	3.18		24.28	0	2.01	15.99	8.12	7.27	4.36	4	3	2	7	2	2	6			1	4	2		5
FALSE	High	Master Protein	A0A087ZQ01	CRAL-TRIO domain-containing protein OS=Apis mellifera OX=7460 PE=4 SV=1		0	FALSE	9.422	11	2	3	2	313	36	7.87										0						1.96			3.59											1
FALSE	High	Master Protein	A0A088AC27	CRAL-TRIO domain-containing protein OS=Apis mellifera OX=7460 PE=4 SV=1		0	FALSE	5.604	4	1	1	1	279	32.4	6.9													2.42																				1
FALSE	High	Master Protein	A0A088ARS8	CS domain-containing protein OS=Apis mellifera OX=7460 PE=4 SV=1		0.009	FALSE	2.928	5	1	10	1	176	20.1	4.46	2.09	0		0	1.93		1.82		1.99	1.92						2.06			1.81		1	1		1	1		1		1	1
FALSE	High	Master Protein	A0A088ARR5	CSD_1 domain-containing protein OS=Apis mellifera OX=7460 GN=yps PE=4 SV=1		0	FALSE	24.892	14	4	14	4	279	30.2	9.95	5.49	4.44					8.87				1.61	7.09		4.39			2.78				1	2					2				1	4		1
FALSE	High	Master Protein	A0A088AE32	CTLH domain-containing protein OS=Apis mellifera OX=7460 PE=4 SV=1		0	FALSE	14.464	6	2	2	2	330	36.8	5.53	2.23													3.99							1													1
FALSE	High	Master Protein	A0A088AKE3	C-type lectin domain-containing protein OS=Apis mellifera OX=7460 GN=100578121 PE=4 SV=1		0	FALSE	13.542	11	3	11	3	315	37.2	9.91					10.4			2.04	1.76	0								0		3.44					3			1	1	1
FALSE	High	Master Protein	A0A087ZXS4	C-type lectin domain-containing protein OS=Apis mellifera OX=7460 GN=CTL11 PE=4 SV=1		0	FALSE	22.184	28	5	20	4	219	25.3	7.36					4.88			7.16	8.26	4.86	2.73		0		0			3.15		12.31					2			2	2	3	1		1
FALSE	High	Master Protein	A0A087ZNY6	C-type lectin domain-containing protein OS=Apis mellifera OX=7460 GN=CTL5 PE=4 SV=1		0	FALSE	77.693	59	9	138	8	217	25	8.32	22.36	0	21.66	21.82	40.51	4.5		28.73	5.62	27.64	8.13		29.09	14.32	4.72	7.61	6.98	14.77	6.78	33.47	5	2	6	6	7	3		8	3	6	2		5	3
FALSE	High	Master Protein	A0A088AM42	C-type lectin domain-containing protein OS=Apis mellifera OX=7460 PE=4 SV=1		0	FALSE	54.801	44	7	95	7	231	26.8	7.36	2.79	16.59	26.85	29.53	12.58	0	0	25.65		27.13	0		4.12	1.83	0	3.73	15.56	6.63	9.79	28.89	1	5	7	6	5	1	1	7		6	1		2	1
FALSE	High	Master Protein	A0A088AHY5	CUB domain-containing protein OS=Apis mellifera OX=7460 GN=LOC551372 PE=4 SV=1		0	FALSE	26.894	23	5	41	5	372	41.4	5.68	0	6.35	7.87	11.36	3.56	1.88		3.92		1.82						1.62	6.13	3.66	1.9	0	1	2	3	4	1	1		1		1
FALSE	High	Master Protein	A0A088AAK4	CUE domain-containing protein OS=Apis mellifera OX=7460 GN=LOC409427 PE=4 SV=1		0.005	FALSE	3.686	8	1	1	1	392	44.9	9.5	2.41																				1
FALSE	High	Master Protein	A0A087ZSA2	CULLIN_2 domain-containing protein OS=Apis mellifera OX=7460 GN=LOC410565 PE=3 SV=1		0	FALSE	6.887	2	1	1	1	777	89.5	8.4														3.14																				1
FALSE	High	Master Protein	A0A088AM88	CULLIN_2 domain-containing protein OS=Apis mellifera OX=7460 PE=3 SV=1		0.001	FALSE	4.809	3	1	1	1	631	73.1	6.81																4.02
FALSE	High	Master Protein	A0A088A6G8	CYCLIN domain-containing protein OS=Apis mellifera OX=7460 GN=LOC412342 PE=3 SV=1		0	FALSE	22.436	23	5	14	5	271	31.2	5.99	8.49			2.05	2.91	2.35	2.07						1.63	5.56			0		0	2.49	3			2	1	1	1						1	2
FALSE	High	Master Protein	Q0GQQ4	Cys-loop ligand-gated ion channel subunit (Fragment) OS=Apis mellifera OX=7460 PE=2 SV=1		0	FALSE	37.506	21	5	16	5	469	54.2	8.69	5.12				6.84			6.1			1.76			5.58				14.58		13.73	1				2			2			1			2
FALSE	High	Master Protein	A3RCF7	Cytochrome b (Fragment) OS=Apis mellifera OX=7460 GN=cytb PE=3 SV=1		0	FALSE	36.521	54	5	16	1	247	29.3	9.26	2.22	0	0	0			2.1	2.06			2.46		3.11	11.22			0	2.06	0		1	1	1	1			1	1			1		1	2
FALSE	High	Master Protein	A0A347ZMU3	Cytochrome b OS=Apis mellifera OX=7460 GN=Cytb PE=3 SV=1		0	FALSE	38.005	36	8	74	1	383	45.2	9.29	11.77	9.64	11.06	6.92	12.14	8	9.16	9.95	6.57		2.46		5.14	0		2.58	8.42	9.76	10.06	9.82	4	4	3	3	3	3	4	4	2		1		2	1
FALSE	High	Master Protein	A0A0B5HAV3	Cytochrome b OS=Apis mellifera syriaca OX=279977 GN=CYTB PE=3 SV=1		0	FALSE	37.533	36	8	60	1	383	45.2	9.29	10.11	9.64	11.06	6.92	10.2	8	9.16	8.23	6.57		2.46		5.14	0		2.58	10.38	8.04	6.41	9.82	3	3	3	3	2	2	3	3	2		1		2	1
FALSE	High	Master Protein	A0A088AV27	Cytochrome b5 heme-binding domain-containing protein OS=Apis mellifera OX=7460 GN=LOC413164 PE=3 SV=1		0	FALSE	102.236	70	14	139	14	198	22.1	5.08	35.46	17.46	12.11	7.48	25.82	23.34	29.99	17.26	7.2	12.67	14.64	6.35	7.04	61.81	8.7	32.28	35.62	27.35	23.35	17.2	9	3	2	1	4	5	7	3	1	2	5	3	3	11
FALSE	High	Master Protein	A0A088A5G3	Cytochrome b5 heme-binding domain-containing protein OS=Apis mellifera OX=7460 GN=LOC413486 PE=3 SV=1		0	FALSE	11.809	27	2	16	2	138	15.8	4.7	2.54	3.01	6.06	2.89	3.73	3.04	2.78	5.45	3.28	3.06				5.06		3.33	3.87			3.76	1	1	1	1	1	1	1	1	1	1				1
FALSE	High	Master Protein	A0A087ZUT8	Cytochrome b5 heme-binding domain-containing protein OS=Apis mellifera OX=7460 GN=LOC726860 PE=3 SV=1		0	FALSE	60.728	51	4	220	4	130	14.5	5.29	62.21	26.69	14.71	19.28	35.65	38.29	49.86	21.15	15.54	15.69	20.05	31.66	9.93	60.44	2.67	35.55	35.81	31.45	41.4	18.5	4	3	3	3	3	3	4	3	3	3	2	3	3	3
FALSE	High	Master Protein	A0A088AJP5	Cytochrome b5 heme-binding domain-containing protein OS=Apis mellifera OX=7460 PE=4 SV=1		0	FALSE	128.623	42	15	136	15	427	50.1	7.74	46.63				50.97	4.47		6.16	0	5.78	2.31			66.81	6.51	72.58		17.43	25.99	22.88	10				9	1		2	2	2	1			9
FALSE	High	Master Protein	A0A088AFT4	Cytochrome b-c1 complex subunit 6 OS=Apis mellifera OX=7460 GN=LOC726316 PE=3 SV=1		0	FALSE	44.04	44	2	113	2	87	10.2	6.99	17.29	0	0		11.35	12.83	16.68	10.4	0	0	6.93		22.35	20.73		14.85	20.18	12.52	7.85	0	2	1	1		2	1	2	2	2	2	2		1	2
FALSE	High	Master Protein	A0A088ASD9	Cytochrome b-c1 complex subunit 7 OS=Apis mellifera OX=7460 GN=LOC551757 PE=3 SV=1		0	FALSE	139.634	70	12	409	12	110	13.5	5.92	57.85	37.28	35.11	31.28	80.05	61.27	73.7	64	33.02	31.33	31.62	29.04	136.64	60.93	23.55	69.09	68.96	81.15	53.64	50.75	8	7	8	5	8	11	9	11	9	9	4	5	6	6
FALSE	High	Master Protein	A0A088AI48	Cytochrome b-c1 complex subunit Rieske, mitochondrial OS=Apis mellifera OX=7460 PE=4 SV=1		0	FALSE	84.811	59	13	354	13	246	26.7	9.13	73.22	55.86	49.83	45.26	65.6	50.58	57.08	54.81	39.5	26.78	26.16	31.13	18.44	33.44	7.65	52.06	63.92	62.83	49.23	30.29	8	9	9	9	9	8	10	10	8	7	5	6	5	7
FALSE	High	Master Protein	A0A087ZSK5	Cytochrome c heme lyase OS=Apis mellifera OX=7460 GN=LOC408968 PE=3 SV=1		0	FALSE	8.074	12	2	8	2	276	32.2	6.25			1.65		2.22		2.13	4.11								0		0		0			1		1		1	2
FALSE	High	Master Protein	P00038	Cytochrome c OS=Apis mellifera OX=7460 GN=cytC PE=1 SV=2		0	FALSE	39.07	53	7	42	7	108	11.9	9.47		6.79		6.84		2.68	14.84	2.16	1.76	2.18	0	10.63	16.46	7.23			2.09					3		2		1	5	1	2	1	1	4	5	2
FALSE	High	Master Protein	A0A0B5HAU2	Cytochrome c oxidase subunit 1 OS=Apis mellifera syriaca OX=279977 GN=COX1 PE=3 SV=1		0	FALSE	66.842	27	6	64	6	520	59.1	8.15	9.01		0	0	12.32	2.87	0	2.51	0		6.8	3.22	15.31	26.53		20.34	13.39	0	17.11	7.13	1		2	1	1	1	1	1	1		2	1	1	4
FALSE	High	Master Protein	P20375	Cytochrome c oxidase subunit 2 OS=Apis mellifera ligustica OX=7469 GN=COII PE=3 SV=1		0	FALSE	55.855	28	5	238	5	225	26.6	6.37	39.58	41.13	42.62	29.36	37.15	28.74	42.12	42.74	17.68	19.81	22.71	68.57	74.86	39.99	12.39	27.73	39.48	39.03	33.3	26.01	2	4	5	4	4	4	4	4	2	2	2	2	3	2
FALSE	High	Master Protein	A0A087ZUZ0	Cytochrome c oxidase subunit OS=Apis mellifera OX=7460 GN=Cox6b1 PE=3 SV=1		0	FALSE	67.581	84	6	161	6	92	10.9	7.78	31.05	28.9	22	21.94	26.18	4.76	44.14	35.54	23.59	22.77	2.11	0	8.28	17.24	0	17.2	5.86	20.52	4.6	11.85	3	4	4	4	4	3	5	3	3	4	2	4	1	3
FALSE	High	Master Protein	Q309A5	Cytochrome P450 monooxygenase OS=Apis mellifera OX=7460 GN=CYP6AS5 PE=2 SV=1		0	FALSE	181.049	51	25	238	3	499	57.9	8.38	48.52	2.62	25.23	64.18	26.12	49.62		17.11	17.79	7.75	6.28		6.01	51.53	2.15	137.45		74.17	101.24	0	11	1	9	15	6	12		5	5	2	2		2	11
FALSE	High	Master Protein	A0A088AEK4	Cytochrome P450 monooxygenase OS=Apis mellifera OX=7460 PE=4 SV=1		0	FALSE	163.373	47	22	232	1	491	57.1	8.56	56.86	2.62	23.01	65.62	28.38	42.36		19.39	17.79	7.75	6.28		6.01	47.63	2.15	134.65		75.59	92.02	0	11	1	8	15	7	11		6	5	2	2		2	10
FALSE	High	Master Protein	F1DPP0	Cytochrome P450 OS=Apis mellifera OX=7460 PE=2 SV=1		0	FALSE	5.599	6	2	2	2	514	59.2	8.59					4.35																				2
FALSE	High	Master Protein	A0A088ADG9	CYTOSOL_AP domain-containing protein OS=Apis mellifera OX=7460 PE=4 SV=1		0	FALSE	209.344	66	19	243	19	457	49.3	6.98	106.06	16.1	4.98	13.07	8.63	61.2	64.29	16.34	3.91		55.62	44.36	43.09	64.64	0	97.32	42.2	17.4	78.86	6.57	15	7	2	4	2	13	11	4	1		8	11	12	10
FALSE	High	Master Protein	A0A088AP39	Cytosolic Fe-S cluster assembly factor NUBP1 homolog OS=Apis mellifera OX=7460 GN=412289 PE=3 SV=1		0	FALSE	12.457	21	4	7	4	324	35.1	5.11	4.31															0			0		3
FALSE	High	Master Protein	A0A088AR65	Cytosolic Fe-S cluster assembly factor NUBP2 homolog OS=Apis mellifera OX=7460 GN=LOC410516 PE=3 SV=1		0	FALSE	22.388	28	5	12	5	260	28	6.13	9.91			3.15			0				0					5.7			8.54		3			3			1				1
FALSE	High	Master Protein	A0A088ANE4	DAGKc domain-containing protein OS=Apis mellifera OX=7460 GN=727071 PE=4 SV=1		0	FALSE	18.491	16	5	8	5	432	49.3	8.29					3.28		0	1.66	1.67		0			2.48				1.77		1.7					1		1	1	1		1			1
FALSE	High	Master Protein	A0A087ZYZ6	DAO domain-containing protein OS=Apis mellifera OX=7460 GN=LOC410999 PE=4 SV=1		0	FALSE	40.074	18	7	64	7	454	50.7	9.14	7.56	7.63	12.62	0	8.79	7.78	21	10.71	2.76	2.03	0			6.46		7.95	12.44	11.58	5.76	6.34	3	3	5	1	3	3	6	4	2	1	1			3
FALSE	High	Master Protein	A0A087ZUJ8	DAO domain-containing protein OS=Apis mellifera OX=7460 PE=4 SV=1		0.008	FALSE	3.069	4	1	3	1	420	46.9	6.14							0												0	0							1
FALSE	High	Master Protein	A0A088AVI9	DDHD domain-containing protein OS=Apis mellifera OX=7460 GN=rdgB PE=4 SV=1		0	FALSE	13.256	3	3	4	3	1270	141.8	7.06	2.8	1.71									2.42										1	1									2
FALSE	High	Master Protein	B9UKF1	Defensin OS=Apis cerana cerana OX=94128 GN=Def PE=2 SV=1		0.002	FALSE	4.233	9	1	1	1	95	10.7	7.24			2.36																				1
FALSE	High	Master Protein	A0A088A822	Delta-1-pyrroline-5-carboxylate synthase OS=Apis mellifera OX=7460 GN=LOC412948 PE=3 SV=1		0	FALSE	541.422	62	42	1165	42	784	85	7.81	478.83		154.91	88.62	153.46	262.53		501.44	99.79	58.64	42.05	14.78	0	601.29	14.2	330.78		284.71	252.56	99.79	38		29	24	26	31		41	22	13	12	7	1	29
FALSE	High	Master Protein	A0A088ACF3	Delta-aminolevulinic acid dehydratase OS=Apis mellifera OX=7460 GN=Pbgs PE=3 SV=1		0	FALSE	26.254	17	5	21	5	336	37	8.53		2.69					8.87		0		2.81	2.08		7.14		4.7	7.62	11.49				1					3		1		2	2		1
FALSE	High	Master Protein	A0A088AQM2	Deltameth_res domain-containing protein OS=Apis mellifera OX=7460 GN=LOC551381 PE=4 SV=1		0	FALSE	61.002	62	3	238	3	94	10.5	9.76	30.35	38.54	35.61	23.44	35.09	30.31	41.25	39.46	26.71	17.01	12.08	59.2	102.44	29.12	8.76	30.3	33.56	42.96	24.63	25.77	2	2	2	2	2	2	2	2	2	2	1	1	2	2
FALSE	High	Master Protein	A0A088A8J8	Deoxyhypusine hydroxylase OS=Apis mellifera OX=7460 GN=LOC410763 PE=3 SV=1		0	FALSE	28.657	21	5	17	5	303	34.2	5.11	14.51					0	0							3.55		6.46	0	0		1.64	4					1	1							1
FALSE	High	Master Protein	A0A087ZR38	DEP domain-containing protein OS=Apis mellifera OX=7460 GN=Trp1 PE=4 SV=1		0	FALSE	21.59	12	4	12	4	364	42.6	8.56	2.55	2.74					2.62					4.25		11.07		2.48	8.02				1	1					1					2		2
FALSE	High	Master Protein	A0A088A2G9	Dephospho-CoA kinase OS=Apis mellifera OX=7460 PE=3 SV=1		0	FALSE	22.173	17	2	16	2	236	27.2	9.26	5.76	0			3.06	4.74								4.08		7.83	0	5.18	2.74		1	1			1	1								1
FALSE	High	Master Protein	A0A2G4QX61	Diaminopimelate decarboxylase OS=Serratia marcescens OX=615 GN=lysA PE=3 SV=1		0.006	FALSE	3.214	5	1	12	1	420	46.2	6.24	2.91		2.12		2.44		4.81		2.57	2.95		2		2.41			2.38	2.9		2.3	1		1		1		1		1	1		1		1
FALSE	High	Master Protein	A0A088APL2	Dihydrolipoamide acetyltransferase component of pyruvate dehydrogenase complex OS=Apis mellifera OX=7460 GN=LOC551631 PE=3 SV=1		0	FALSE	174.988	51	21	279	21	622	66.9	6.74	60.85	25.73	37.21	36.38	47.21	52.91	39.41	57.74	34.69	13.02	27.62	6.54	11.33	59.15	3.5	58.26	28.12	63.19	44.67	33.47	13	9	10	12	12	13	12	12	12	6	8	3	5	12
FALSE	High	Master Protein	A0A088AII9	Dihydrolipoyl dehydrogenase OS=Apis mellifera OX=7460 GN=LOC551039 PE=3 SV=1		0	FALSE	240.983	53	19	346	19	507	54.5	7.64	82.15	52.76	26.61	33.22	37.21	95.1	66.88	57.05	28.37	5.56	48.04	37.43	35.93	69.22	0	53.61	57.25	87.09	42.96	34.25	9	10	5	10	8	12	10	11	7	2	7	5	9	10
FALSE	High	Master Protein	A0A093SLA1	Dihydrolipoyl dehydrogenase OS=Pectobacterium carotovorum subsp. carotovorum OX=555 GN=KP17_07805 PE=3 SV=1		0.002	FALSE	4.136	4	1	1	1	474	50.5	6.23																4.06
FALSE	High	Master Protein	A0A0G8BB29	Dihydrolipoyl dehydrogenase OS=Serratia marcescens OX=615 GN=BHU62_20255 PE=3 SV=1		0.003	FALSE	3.994	4	1	1	1	474	50.5	6.04																				3.52
FALSE	High	Master Protein	A0A2G4QS53	Dihydrolipoyllysine-residue succinyltransferase component of 2-oxoglutarate dehydrogenase complex OS=Serratia marcescens OX=615 GN=CS370_12165 PE=3 SV=1		0	FALSE	5.079	8	2	2	2	405	43.8	5.57			0																				2
FALSE	High	Master Protein	A0A088AF14	Dihydroorotate dehydrogenase (quinone), mitochondrial OS=Apis mellifera OX=7460 GN=100577081 PE=3 SV=1		0	FALSE	12.534	13	4	8	4	392	43.4	9.22	2.07				0			1.69			2.42			3.36			1.66	1.92			1				1			1			1			1
FALSE	High	Master Protein	A0A2H4MD19	Dihydropteridine reductase (Fragment) OS=Apis mellifera OX=7460 GN=DHPR PE=2 SV=1		0	FALSE	29.541	37	6	17	1	230	24.9	8.76		9.87		4.01			3.77		2.27		2.23	0	5.58	2.49								3		1			1		1		1	1	2	1
FALSE	High	Master Protein	A0A087ZQA2	Dipeptidase OS=Apis mellifera OX=7460 PE=3 SV=1		0	FALSE	137.147	43	14	117	14	418	47	7.24	39.86		13.35	0	44.46	28.06	0	55.29	16.25	0				13.9	2.3	32.31		77.48	5.49	46.43	7		5	2	10	5	1	13	5	1				4
FALSE	High	Master Protein	A0A088AEB7	DIRP domain-containing protein OS=Apis mellifera OX=7460 PE=4 SV=1		0.005	FALSE	3.672	3	1	3	1	623	70.9	9.38	0															0					1
FALSE	High	Master Protein	A0A088ARC7	DJ-1_PfpI domain-containing protein OS=Apis mellifera OX=7460 PE=4 SV=1		0	FALSE	14.835	30	4	7	4	186	20.2	6.57		5.59		2.62			2.75					0			0							1		2			1					1
FALSE	High	Master Protein	A0A088AGM4	DNA topoisomerase 2 OS=Apis mellifera OX=7460 PE=3 SV=1		0.006	FALSE	3.25	1	1	3	1	1440	164.3	8.78		0							0								2.07					1							1
FALSE	High	Master Protein	A0A088AAI8	DNA-(apurinic or apyrimidinic site) lyase OS=Apis mellifera OX=7460 GN=Rrp1 PE=3 SV=1		0	FALSE	5.246	5	1	2	1	336	38.7	9.09						0										0										1
FALSE	High	Master Protein	A0A086FC00	DNA-binding protein OS=Serratia marcescens OX=615 GN=hupA PE=3 SV=1		0.002	FALSE	4.387	14	1	1	1	90	9.5	9.58				2.23																				1
FALSE	High	Master Protein	A0A084WVH6	DNA-directed RNA polymerase subunit alpha OS=Serratia marcescens OX=615 GN=rpoA PE=3 SV=1		0	FALSE	6.593	8	2	2	2	329	36.4	5.06			0																				2
FALSE	High	Master Protein	A0A088AA86	DNA-directed RNA polymerase subunit OS=Apis mellifera OX=7460 PE=3 SV=1		0	FALSE	8.049	1	1	1	1	1422	160.6	7.99	2.28																				1
FALSE	High	Master Protein	A0A087ZYS0	Dolichol-phosphate mannosyltransferase subunit 1 OS=Apis mellifera OX=7460 GN=LOC409115 PE=3 SV=1		0	FALSE	20.061	18	3	18	3	253	29	8.4	4.26	5.33	1.78		7.09	3.8	6.69	2.82			1.9	2.19		2.74		3.35	6.81	2.02	2.81		1	2	1		2	1	2	1			1	1		1
FALSE	High	Master Protein	A0A087ZSQ6	Dolichyl-diphosphooligosaccharide--protein glycosyltransferase 48 kDa subunit OS=Apis mellifera OX=7460 GN=LOC552051 PE=3 SV=1		0	FALSE	92.741	35	9	112	9	434	48.4	5.55	49.52	23.3	15.46	10.68	23.01	21.37	36.59	6.23	5.67	3.01	2.98	0	0	17.39		27.9	33.44	31.32	19.57	17.71	6	5	6	4	4	4	7	3	3	1	1	1	1	4
FALSE	High	Master Protein	A0A087ZUX6	Dolichyl-diphosphooligosaccharide--protein glycosyltransferase subunit 1 OS=Apis mellifera OX=7460 PE=3 SV=1		0	FALSE	183.14	57	22	265	22	566	65.5	7.34	47.88	48.23	27.01	20.2	30.8	28.41	53.6	27.42	16.77	6.17	24.24	19.58	12.99	86.35	0	55.39	59.95	38.84	49.9	20.52	12	12	11	9	9	9	12	8	6	3	8	8	8	13
FALSE	High	Master Protein	A0A088A702	Dolichyl-diphosphooligosaccharide--protein glycosyltransferase subunit 2 OS=Apis mellifera OX=7460 PE=3 SV=1		0	FALSE	68.598	22	12	58	12	651	73.3	8.92	20.42	17.54	6.66	0	6.31	2.17	16.68	5.77	2.83		4.46	2.44	2.23	5.7		12.43	20.8	3.12	9.55	6.05	6	6	3	1	3	1	5	2	1		1	1	1	3
FALSE	High	Master Protein	A0A088AW39	Dolichyl-diphosphooligosaccharide--protein glycosyltransferase subunit DAD1 OS=Apis mellifera OX=7460 GN=LOC727568 PE=3 SV=1		0	FALSE	8.342	15	2	7	2	111	12.6	8.62					1.95						1.75	1.75		5.71											1						1	2		2
FALSE	High	Master Protein	A0A087ZUP5	DPPIV_N domain-containing protein OS=Apis mellifera OX=7460 PE=4 SV=1		0	FALSE	24.429	12	2	25	2	231	25.8	6.18	20.31	1.85	2.82			3.21		2.18	0	0						7.36	6.62	17.28			1	1	1			1		1	1	1
FALSE	High	Master Protein	A0A088A6Q4	DUF1279 domain-containing protein OS=Apis mellifera OX=7460 GN=LOC725167 PE=4 SV=1		0	FALSE	12.109	7	2	41	2	353	39.7	9.58	8.92	7.73	4.51	4.76	8.07	5.14	10.83	7.95	2.33							2.29	11.21	7.13	8.18	7.79	2	2	2	2	2	1	2	2	1
FALSE	High	Master Protein	A0A087ZN27	DUF1279 domain-containing protein OS=Apis mellifera OX=7460 PE=4 SV=1		0.009	FALSE	2.924	5	1	1	1	242	28.3	10.04								1.85																				1
FALSE	High	Master Protein	A0A088A7I9	DUF1681 domain-containing protein OS=Apis mellifera OX=7460 GN=LOC409531 PE=4 SV=1		0	FALSE	11.326	12	2	5	2	243	27.3	8.51	7.33			0										5.61		4.15					2			1										1
FALSE	High	Master Protein	A0A088AMG1	DUF1713 domain-containing protein OS=Apis mellifera OX=7460 GN=107965473 PE=4 SV=1		0	FALSE	5.267	9	2	2	2	233	27.6	10.13							0						1.65														1						1
FALSE	High	Master Protein	A0A088ADG0	DUF1741 domain-containing protein OS=Apis mellifera OX=7460 PE=4 SV=1		0	FALSE	6.587	4	2	2	2	672	76.4	6.74				2.11																				2
FALSE	High	Master Protein	A0A088A078	DUF1794 domain-containing protein OS=Apis mellifera OX=7460 GN=107964437 PE=4 SV=1		0	FALSE	7.572	5	1	2	1	169	19.7	8.73														1.92																				1
FALSE	High	Master Protein	A0A088A055	DUF1907 domain-containing protein OS=Apis mellifera OX=7460 GN=LOC411385 PE=4 SV=1		0	FALSE	36.851	28	6	36	6	319	35.4	6.57	9.17		0	4.67	9.05	3.04		5.54	8.38	8.55				2.53		10.47			7.25	8.3	3		1	4	3	1		2	4	3				1
FALSE	High	Master Protein	A0A088ATH0	DUF2236 domain-containing protein OS=Apis mellifera OX=7460 GN=LOC408641 PE=4 SV=1		0	FALSE	8.928	7	2	4	2	339	40.1	9.2											2.42			1.98			1.77		2.4												1			1
FALSE	High	Master Protein	A0A088ANF4	DUF3421 domain-containing protein OS=Apis mellifera OX=7460 PE=4 SV=1		0	FALSE	30.4	27	3	79	3	132	14.4	5.81	31.37		4.92	2.1	19.8	4.9		5.12	18.41	12.48	2.29	0		38.54	12.54	13.63		15.72		13.42	3		2	1	3	2		1	2	2	1	1		3
FALSE	High	Master Protein	A0A088AA70	DUF3421 domain-containing protein OS=Apis mellifera OX=7460 PE=4 SV=1		0	FALSE	52.99	38	4	87	4	125	13.9	8.18	24.6		7.72	2.01	23.88			5.56	34.63	1.95			0	39.6	10.62	22.43	0	24.7	5.43	7.46	3		2	2	4			2	4	1			1	3
FALSE	High	Master Protein	A0A088AH64	DUF3456 domain-containing protein OS=Apis mellifera OX=7460 PE=4 SV=1		0.001	FALSE	4.886	6	1	1	1	200	23	4.82												2.28																				1
FALSE	High	Master Protein	A0A088A8Z1	DUF4758 domain-containing protein OS=Apis mellifera OX=7460 PE=4 SV=1		0.008	FALSE	3.039	2	1	2	1	1011	110.5	8.09							2.08																				1
FALSE	High	Master Protein	A0A087ZVH4	DUF89 domain-containing protein OS=Apis mellifera OX=7460 GN=PANK4 PE=4 SV=1		0	FALSE	67.999	23	13	65	13	784	88.5	7.02	21.26		4.65	2.11	6.89	13.87		18.57	8.89	3.27				7.42	0	16.56		11.09	8.89	22.41	6		2	1	3	3		10	2	2				3
FALSE	High	Master Protein	A0A088A6F7	DUF953 domain-containing protein OS=Apis mellifera OX=7460 GN=cl PE=4 SV=1		0	FALSE	23.788	33	3	14	3	126	14.6	5.55	13.91			0		0										14.88		0	1.76		3			1		1
FALSE	High	Master Protein	A0A088A1V1	Dynamin-type G domain-containing protein OS=Apis mellifera OX=7460 GN=410263 PE=3 SV=1		0	FALSE	9.762	4	3	6	3	766	87.7	7.03			0		2.18		2.17						2.02			0	2.2						1		1		1						1
FALSE	High	Master Protein	A0A088AMM2	Dynamin-type G domain-containing protein OS=Apis mellifera OX=7460 GN=opa1-like PE=3 SV=1		0	FALSE	40.847	11	7	20	7	976	113.6	8.47	6.53	0			2.43	3.02	3.31	3.34			7.94		3.56	10.07			3.14		2.19		3	1			2	1	1	1			3		2	3
FALSE	High	Master Protein	A0A087ZRS3	Dynamin-type G domain-containing protein OS=Apis mellifera OX=7460 PE=3 SV=1		0	FALSE	128.978	30	20	159	20	868	97.9	4.44	48.44	7.06	0	9.95	21.07	70.06	25.6	0	17.7	2.5	28.14	1.75		19.58		22.51	29.35	30.16	58.1	5.8	9	4	1	6	6	15	9	2	5	3	9	2		7
FALSE	High	Master Protein	A0A087ZYC6	Dynein light chain OS=Apis mellifera OX=7460 GN=DLC-D PE=3 SV=1		0	FALSE	17.707	45	3	27	3	89	10.4	7.37	5.82	2.89	2.58	6.18	1.65		0		2.66	4.08	3.07	3.34	0	9.99		2.11					2	1	3	3	1		1		1	2	2	2	2	2
FALSE	High	Master Protein	A0A088ADJ6	Dynein light chain roadblock OS=Apis mellifera OX=7460 GN=robl PE=3 SV=1		0	FALSE	6.561	12	1	3	1	97	10.8	6.55									2.02					6.44															1					1
FALSE	High	Master Protein	A0A088A8B6	Dynein light intermediate chain OS=Apis mellifera OX=7460 GN=Dlic PE=3 SV=1		0	FALSE	25.051	12	4	8	4	480	53.4	5.81	3.23	2.45					3.64				0			8.15							1	1					1				2			3
FALSE	High	Master Protein	A0A088AKW6	DZF domain-containing protein OS=Apis mellifera OX=7460 GN=Zn72D PE=4 SV=1		0	FALSE	67.113	16	11	33	11	997	108.1	9.04	19.83	4.58				2.99	7.59				6.64	2.09	1.66	20.59		4.75	2.24		5.92		4	2				1	3				3	2	2	6
FALSE	High	Master Protein	A0A088ADR7	E2_bind domain-containing protein OS=Apis mellifera OX=7460 GN=LOC409394 PE=4 SV=1		0	FALSE	15.854	11	4	5	4	439	49.4	6.3											0		0	5.36																	1		1	3
FALSE	High	Master Protein	A0A088AQA6	E2F_TDP domain-containing protein OS=Apis mellifera OX=7460 PE=3 SV=1		0.005	FALSE	3.837	5	1	1	1	298	34.2	5.05	2.15																				1
FALSE	High	Master Protein	A0A088ACJ8	E3 ubiquitin-protein ligase OS=Apis mellifera OX=7460 PE=3 SV=1		0.003	FALSE	4.011	1	1	2	1	1353	154	5.85	0															0					1
FALSE	High	Master Protein	A0A088AUN3	EF-hand domain-containing protein OS=Apis mellifera OX=7460 GN=LOC552747 PE=4 SV=1		0	FALSE	58.405	28	8	23	8	526	59.8	4.5	7.06	2.36					11.9				9.67	2.98		21.08		4.32		2.54	2.75		2	1					4				3	1		5
FALSE	High	Master Protein	A0A088AAX0	EF-hand domain-containing protein OS=Apis mellifera OX=7460 GN=Manf PE=4 SV=1		0.006	FALSE	3.474	6	1	2	1	175	20.1	7.52												2.01	1.77																			1	1
FALSE	High	Master Protein	A0A087ZRZ9	EF-hand domain-containing protein OS=Apis mellifera OX=7460 PE=4 SV=1		0	FALSE	34.293	37	6	37	6	126	15	9.33	5.24	2.45	0	0		2.62	21.46				1.88	10.9					16.45	4.03			2	2	1	1		2	5				3	5
FALSE	High	Master Protein	A0A088AA85	eIF2B_5 domain-containing protein OS=Apis mellifera OX=7460 PE=4 SV=1		0	FALSE	29.764	29	10	28	10	335	38.3	7.64	2.77	2.31		1.67	2.77	2.35	2.28	2.14	0		4.24	0		6.46		7.58	0		2.92	6.31	2	1		6	1	1	1	1	1		2	2		1
FALSE	High	Master Protein	A0A0B4J2M5	Electron transfer flavoprotein-ubiquinone oxidoreductase OS=Apis mellifera OX=7460 GN=Etfdh PE=4 SV=1		0	FALSE	111.332	38	17	155	17	606	67	7.53	33.62	7.57	6.5	4.68	23.24	27.09	33.08	32.64	13.65	6.79	11.59	1.69	1.94	8.71	0	35.17	24.53	30.27	19.44	19.52	8	4	7	3	8	5	10	12	6	3	5	1	1	3
FALSE	High	Master Protein	A0A087ZS68	ELFV_dehydrog domain-containing protein OS=Apis mellifera OX=7460 GN=Gdh PE=3 SV=1		0	FALSE	371.891	67	32	918	32	553	61.6	8.09	109.69	251.94	125.7	122.93	30.72	149.77	254.26	111.95	114.39	7.97	91.06	127.96	52.7	227.18	6.04	115.42	157.64	144.58	81.6	65	23	31	24	27	8	26	29	24	22	4	18	23	16	24
FALSE	High	Master Protein	A0SU68	Elongation factor 1-alpha (Fragment) OS=Apis mellifera OX=7460 GN=EF-1a-F2 PE=4 SV=1		0	FALSE	206.68	73	11	630	1	172	19	6.79	202.34	90.38	62.99	103.62	105.1	122.53	118.66	79.43	91.25	74.33	53.96	118.59	138.79	156.98	13.23	160.18	88.09	110.5	128.91	68.32	9	8	8	8	8	8	8	8	9	7	7	9	7	9
FALSE	High	Master Protein	A0A087ZRE3	Elongation factor 1-alpha OS=Apis mellifera OX=7460 GN=EF1a-F2 PE=3 SV=1		0	FALSE	351.141	61	22	1159	1	461	50.3	9.03	356.54	141.07	101.34	187.51	153.6	219.44	201.19	135.63	110.87	133.21	160.45	260.37	230.27	348.06	27.88	298.05	155.66	168.17	226.73	121.91	18	14	15	15	15	15	15	15	14	13	14	15	13	16
FALSE	High	Master Protein	P19039	Elongation factor 1-alpha OS=Apis mellifera OX=7460 PE=3 SV=1		0	FALSE	170.14	54	18	597	6	461	50.5	9.09	150.81	44.85	52.57	84.76	60.93	125.96	66.61	50.51	44.44	40.95	107.4	45.18	32.77	78.46	14.64	139.91	52.99	64.27	108.7	48.7	13	10	9	12	10	13	11	9	8	8	9	8	6	9
FALSE	High	Master Protein	O61334	Elongation factor 1-alpha OS=Apis mellifera OX=7460 PE=3 SV=1		0	FALSE	302.919	61	22	1058	1	461	50.3	9.03	305.28	115.56	90.9	156.64	138.47	186.78	169.98	113.03	103.14	113.09	157.45	240.93	193.3	311.17	27.88	255.06	130.56	162.18	200.76	108.28	17	13	14	14	14	14	14	14	13	12	13	14	12	15
FALSE	High	Master Protein	A0A0P0Q816	Elongation factor G OS=Serratia marcescens OX=615 GN=fusA PE=3 SV=1		0	FALSE	11.906	6	3	3	3	704	77.6	5.27			5.16	0																			2	1
FALSE	High	Master Protein	A0A087ZTR9	Elongation factor G, mitochondrial OS=Apis mellifera OX=7460 GN=LOC411351 PE=3 SV=1		0	FALSE	30.491	12	7	21	7	744	84.5	7.11	7.74					4.92	2.46	2.21				1.9	1.63	7.53		9.87	2.08	2.42	2.24		2					3	1	1				1	2	2
FALSE	High	Master Protein	A0A088A1L8	Elongation factor Ts, mitochondrial OS=Apis mellifera OX=7460 GN=LOC408352 PE=3 SV=1		0	FALSE	74.425	70	13	66	13	302	34	6.71	17.06	2.28	1.63	1.7	2	13.13	10.24		3.02		4.53	6.51	1.64	13.26		32.87	7.28	13.58	13.46	0	5	1	1	2	1	5	4		2		3	3	3	5
FALSE	High	Master Protein	D1MWN8	Elongation factor Tu (Fragment) OS=Pectobacterium carotovorum subsp. carotovorum OX=555 GN=tuf PE=4 SV=1		0	FALSE	52.807	40	7	59	2	257	28.7	4.89	3.58		28.16	9.67	5.23	6.98		12.92	0	5.41			1.64	7.31		7.71			18.71	18.55	1		5	2	1	1		4	1	1			1	2
FALSE	High	Master Protein	A0A087ZW54	Elongation factor Tu OS=Apis mellifera OX=7460 GN=LOC408328 PE=3 SV=1		0	FALSE	482.294	76	32	1534	30	469	52.4	7.96	330.77	177.98	190.49	167.31	181.07	205.66	248.62	233.99	123.11	78.12	179.37	124.12	187.17	385.76	39.87	262.53	227.04	271.92	244.04	139.44	27	25	25	26	22	25	26	26	22	16	19	18	18	22
FALSE	High	Master Protein	A0A1B4XKS5	Elongation factor Tu OS=Enterococcus faecalis OX=1351 GN=tuf PE=3 SV=1		0	FALSE	38.151	13	4	24	3	395	43.4	4.83			19.53					10.62	10.28							2.51			16.72	15.23			3					1	1
FALSE	High	Master Protein	A0A087EP72	Elongation factor Tu OS=Lactobacillus kunkeei OX=148814 GN=tuf PE=3 SV=1		0	FALSE	20.167	15	4	71	1	395	43.4	4.94	8.91	4.18	8.7	8.62	8.61	6.36	8.77	10.27	6.36		8.46	4.5	6.48	8.83	3.75	11.13	8.44	6.78	12.05	5.94	1	1	3	1	1	1	1	2	2		1	1	2	1
FALSE	High	Master Protein	V5T6M5	Elongation factor Tu OS=Lactobacillus mellis OX=1218508 GN=tuf PE=3 SV=1		0	FALSE	33.245	23	6	82	3	417	46.2	4.97	8.91	5.92	10.76	13.17	8.61	10.04	10.66	15.91	4.43		8.46	9.01	9.53	10.9	3.75	11.43	9.89	6.78	8.85	4.02	1	2	4	2	1	2	2	5	1		1	2	2	2
FALSE	High	Master Protein	A0A0J5CD52	Elongation factor Tu OS=Serratia marcescens OX=615 GN=tuf PE=3 SV=1		0	FALSE	113.248	53	14	89	7	394	43.2	5.31	3.58		38.61	12.58	5.23	6.98		20.44	10.28	5.41			1.64	4.16	0	16.64			42.01	40.46	1		7	4	1	1		4	2	1			1	1
FALSE	High	Master Protein	V5RJB0	Elongation factor Tu OS=Spiroplasma apis B31 OX=1276258 GN=tufA PE=3 SV=1		0	FALSE	38.861	9	3	87	1	395	43	5.31	8.91	4.18	29.52	8.62	8.61	6.36	8.77	26.57	14.71		8.46	4.5	4.74	8.83	3.75	11.73	8.44	6.78	21.92	19.25	1	1	3	1	1	1	1	3	2		1	1	1	1
FALSE	High	Master Protein	A0A088AIA2	Elongation of very long chain fatty acids protein OS=Apis mellifera OX=7460 GN=LOC413789 PE=3 SV=1		0	FALSE	16.219	4	1	3	1	331	38.9	9.11														7.04		3.02																		1
FALSE	High	Master Protein	A0A088AIA4	Elongation of very long chain fatty acids protein OS=Apis mellifera OX=7460 PE=3 SV=1		0	FALSE	10.883	23	3	9	3	139	16.4	7.4	1.66						2.39							2.75			2.3	3.96			1						2							1
FALSE	High	Master Protein	A0A088AIA5	Elongation of very long chain fatty acids protein OS=Apis mellifera OX=7460 PE=3 SV=1		0	FALSE	20.275	29	4	25	4	214	25.3	9.45	2.98	3.41	4.09	0		1.69	7.24				5.71	2.9		7.5			5.44	1.93	1.65		2	2	3	1		1	3				1	1		1
FALSE	High	Master Protein	A0A088AJ05	Elongator complex protein 3 OS=Apis mellifera OX=7460 GN=100576866 PE=3 SV=1		0.006	FALSE	3.245	3	1	1	1	551	63.1	8.47																0
FALSE	High	Master Protein	A0A088AG65	EMC1_C domain-containing protein OS=Apis mellifera OX=7460 PE=4 SV=1		0	FALSE	67.449	17	11	29	11	947	106.2	8.44	2.95	5.5	5.63	0	0		10.49				2.35	1.61		4.94		6.53	7.17	4.61	4.46	1.69	2	3	2	1	1		4				1	1		1
FALSE	High	Master Protein	A0A087ZRR4	Endo/exonuclease/phosphatase domain-containing protein OS=Apis mellifera OX=7460 GN=LOC412170 PE=4 SV=1		0.005	FALSE	3.655	3	1	1	1	393	44.5	7.93	2.59																				1
FALSE	High	Master Protein	A0A088ADS9	Endo/exonuclease/phosphatase domain-containing protein OS=Apis mellifera OX=7460 GN=LOC412416 PE=4 SV=1		0	FALSE	13.528	6	2	3	2	558	65.2	7.39											3.25			4.18		2.43															1			1
FALSE	High	Master Protein	A0A088AST9	Enolase OS=Apis mellifera OX=7460 PE=4 SV=1		0	FALSE	206.818	61	16	507	16	366	39.8	7.05	155.47	51.33	1.79	61.97	32.91	138	58	34.34	7.22	41.23	207.79	89.58	61.01	107.22	0	158.73	21.61	28.18	147.05	24.69	15	12	1	12	8	14	12	9	4	10	11	12	9	11
FALSE	High	Master Protein	A0A086FND6	Enolase OS=Serratia marcescens OX=615 GN=eno PE=3 SV=1		0	FALSE	25.425	18	6	11	6	431	45.4	5.38	1.95		9.61			1.74				1.87		0								0	1		4			1				1		1
FALSE	High	Master Protein	A0A088AL38	Enolase-phosphatase E1 OS=Apis mellifera OX=7460 PE=3 SV=1		0	FALSE	10.025	2	1	1	1	743	82.4	4.64														3.2																				1
FALSE	High	Master Protein	A0A088AQL3	ENTH domain-containing protein OS=Apis mellifera OX=7460 GN=lqfR PE=4 SV=1		0	FALSE	19.111	3	4	18	4	1443	165.4	5.53	10.23		0	6.72	2.32	2.47	2.21	1.62	2.12	2.25	2.82					2.62	2.33			2.28	3		1	2	1	1	1	1	1	1	1
FALSE	High	Master Protein	A0A088AKI9	Epimerase domain-containing protein OS=Apis mellifera OX=7460 GN=Gmer PE=3 SV=1		0	FALSE	44.36	31	6	18	6	322	36.8	7.05	17.71					2.77	2.8					0		11.41		9.83	2.54		7.02		3					1	1					1		2
FALSE	High	Master Protein	A0A088ANF9	Epimerase domain-containing protein OS=Apis mellifera OX=7460 GN=LOC412149 PE=4 SV=1		0	FALSE	56.196	32	8	12	8	372	41.6	6.15	18.74							0						6.18		8.43			2.81		5							1						2
FALSE	High	Master Protein	A0A087ZQU6	Epimerase domain-containing protein OS=Apis mellifera OX=7460 PE=4 SV=1		0	FALSE	136.914	48	18	263	18	398	45.9	8.85	65.1	34.12	34.93	13.85	59.46	30.47	50.13	62.96	31.46	20.44	12.7	11.48	14.55	17.23	1.71	25.54	29.27	54.59	19.29	20.17	15	6	7	5	10	7	12	14	6	6	5	6	7	5
FALSE	High	Master Protein	A0A087ZVE8	Epoxide hydrolase OS=Apis mellifera OX=7460 GN=LOC406152 PE=3 SV=1		0	FALSE	102.973	36	12	221	12	456	52	8.35	55.14	24.7	17.57	28.39	23.91	22.47	61.98	13.47	22.27	4.2	6.59	3.52	5.18	29.96	1.75	58.84	36.32	37.89	62.94	10.35	7	7	7	8	5	5	8	4	4	3	3	3	4	6
FALSE	High	Master Protein	A0A088A8F3	ER membrane protein complex subunit 3 OS=Apis mellifera OX=7460 GN=LOC551505 PE=3 SV=1		0.002	FALSE	4.216	11	2	8	2	252	28.6	8.34		0	0	0			0										1.88		2.17			1	1	1			1
FALSE	High	Master Protein	A0A088A8C3	ER membrane protein complex subunit 4 OS=Apis mellifera OX=7460 GN=LOC412349 PE=3 SV=1		0	FALSE	19.579	25	3	17	3	175	19.5	9.44	6.36	7.1	3.13		10.05	6.05	7.87									4.78	9.96	2.68	8.08		1	2	1		3	1	2
FALSE	High	Master Protein	A0A088APV4	Era-type G domain-containing protein OS=Apis mellifera OX=7460 GN=726385 PE=4 SV=1		0.001	FALSE	4.856	6	1	3	1	342	39.9	9.19	0															2.53		0			1
FALSE	High	Master Protein	A0A087ZZH5	eRF1_1 domain-containing protein OS=Apis mellifera OX=7460 PE=4 SV=1		0	FALSE	8.68	9	2	5	2	264	29.5	5.72	5.17								2.96							5.13					2								1
FALSE	High	Master Protein	A0A088A7F1	ETF domain-containing protein OS=Apis mellifera OX=7460 GN=LOC410308 PE=4 SV=1		0	FALSE	106.972	70	16	179	16	253	27.6	6.93	59.4	15.2	2.65	11.54	1.66	35.46	31.15	4.02			25.55	34.26	19.36	46.63		55.11	22.22	19.04	31.11	0	11	8	2	6	1	10	9	3			5	8	6	6
FALSE	High	Master Protein	A0A088A872	ETF domain-containing protein OS=Apis mellifera OX=7460 GN=LOC551710 PE=4 SV=1		0	FALSE	154.825	66	20	217	20	333	35.4	8.32	59.46	42.91	10.12	29.22	6.27	55.52	51.13	21.17	7.51	2.12	29.48	26.67	20.45	32.38		66.42	51.49	44.64	70.5	17.54	10	9	6	8	2	10	14	7	2	1	6	7	6	5
FALSE	High	Master Protein	A0A088AFA9	ETS domain-containing protein OS=Apis mellifera OX=7460 PE=3 SV=1		0	FALSE	98.266	18	17	79	17	1075	121.7	6.67	38.83	5.03		2.73		35.29	6.55				18.82	5.29	17.12	35.03		27.31	2.14	2.18	6.06		10	2		2		10	3				6	2	8	9
FALSE	High	Master Protein	A0A088A560	Eukaryotic translation initiation factor 3 subunit A OS=Apis mellifera OX=7460 GN=eIF3-S10 PE=3 SV=1		0	FALSE	113.448	30	25	79	25	1098	129.8	8.84	43.88	4.73		3.96	3.66	9.02	10.51	3.97	2.95	3.27	8.7	1.87	0	17.86		31.57	8.31	6.93	12.18	6.52	13	2		3	1	3	4	2	2	2	3	3	2	7
FALSE	High	Master Protein	A0A088AC80	Eukaryotic translation initiation factor 3 subunit B OS=Apis mellifera OX=7460 GN=eIF3-S9 PE=3 SV=1		0	FALSE	74.259	28	14	75	14	702	81.5	5.55	41.45	4.37		5.86	2.55	21.53	8.91	4.3	0	6.24	1.93			7.31		32.68	12.69	8.34	4.66	2.08	9	2		4	1	5	7	2	3	2	2			4
FALSE	High	Master Protein	A0A087ZST3	Eukaryotic translation initiation factor 3 subunit C OS=Apis mellifera OX=7460 GN=eIF3-S8 PE=3 SV=1		0	FALSE	65.433	14	9	44	9	892	104.3	5.83	26.59	0		0		11.59	5.79	0	2.52	1.78	4.76		0	6.37		22.25		6.4	9.99	0	6	2		1		4	2	1	1	2	3		1	2
FALSE	High	Master Protein	A0A088AEQ4	Eukaryotic translation initiation factor 3 subunit D OS=Apis mellifera OX=7460 GN=eIF-3p66 PE=3 SV=1		0	FALSE	28.965	14	5	11	5	562	64.6	5.86	4.93					2.32					4.72	1.7		5.36		8.88			2.84		2					2					2	1		1
FALSE	High	Master Protein	A0A088AQJ3	Eukaryotic translation initiation factor 3 subunit E OS=Apis mellifera OX=7460 GN=LOC551242 PE=3 SV=1		0	FALSE	43.895	22	8	33	8	440	51.6	6.07	23.81	0		1.63	2.02	2.45	0				1.73	2.45	0	7.45		12.62		0	4.57	0	4	1		2	2	1	1				2	2	1	3
FALSE	High	Master Protein	A0A088A223	Eukaryotic translation initiation factor 3 subunit F OS=Apis mellifera OX=7460 GN=LOC413145 PE=3 SV=1		0	FALSE	87.988	55	10	46	10	285	31.4	5.74	32.06	2.19		11.14		10.07	11.84	2.05		1.7		3.03		28.44		13.52	3.03		9.52	2.29	6	1		6		2	4	1		1		1		5
FALSE	High	Master Protein	A0A088AKE0	Eukaryotic translation initiation factor 3 subunit G OS=Apis mellifera OX=7460 GN=LOC408386 PE=3 SV=1		0	FALSE	14.891	18	2	6	2	285	31.8	8.06	7.82					3.13	2.85							2.46		3.32					2					1	1							1
FALSE	High	Master Protein	A0A088A4N3	Eukaryotic translation initiation factor 3 subunit H OS=Apis mellifera OX=7460 PE=3 SV=1		0	FALSE	28.067	25	5	15	5	313	36.2	5.87	13.48			3.32		3.03	2.84					2.46		6.71		2.84			3.42		2			1		1	1					1		3
FALSE	High	Master Protein	A0A088A549	Eukaryotic translation initiation factor 3 subunit I OS=Apis mellifera OX=7460 GN=Trip1 PE=3 SV=1		0	FALSE	31.18	17	5	31	5	326	36.6	6.8	10.49	0		4.51	2.26	4.17	1.76				5.8	2.19		6.7		5.72	1.87	2.44	11.49	1.79	3	1		2	1	2	2				2	2		2
FALSE	High	Master Protein	A0A088A861	Eukaryotic translation initiation factor 3 subunit J OS=Apis mellifera OX=7460 GN=Adam PE=3 SV=1		0.009	FALSE	3.021	4	1	1	1	236	27.4	4.96				0																				1
FALSE	High	Master Protein	A0A088ATI4	Eukaryotic translation initiation factor 3 subunit K OS=Apis mellifera OX=7460 GN=LOC551960 PE=3 SV=1		0	FALSE	22.183	24	4	20	4	216	24.8	5.82	14.63					2.04	0				2.18	1.82	0	2.53		2.38		0	0		3					1	2				1	1	1	1
FALSE	High	Master Protein	A0A088AQX2	Eukaryotic translation initiation factor 3 subunit L OS=Apis mellifera OX=7460 GN=LOC552056 PE=3 SV=1		0	FALSE	65.497	24	9	29	9	538	63.4	6.33	19.31	1.73		0		0	3.55	0	0		2.11		0	19.17		10.38	1.98	0	1.99		5	1		1		1	2	1	1		1		1	6
FALSE	High	Master Protein	A0A088A9L4	Eukaryotic translation initiation factor 3 subunit M OS=Apis mellifera OX=7460 GN=Tango7 PE=3 SV=1		0	FALSE	35.687	28	7	31	7	391	44.4	5.59	17.61				2.82	3.82		2.61	0		2.13	3.82	1.85	5.39		15.83	4.1		8.95	3.56	3				1	1		1	1		1	2	2	2
FALSE	High	Master Protein	A0A088ALS2	Eukaryotic translation initiation factor 5A OS=Apis mellifera OX=7460 GN=LOC552572 PE=3 SV=1		0	FALSE	45.587	35	5	45	5	160	17.6	5.4	34.02	6.17	2.97	6.4	7.51	8.87	3.05	3.39	3.01	3.38	3.51	2.54	6.45	5.89		22.02	2.28		6.01	2.61	5	1	1	2	1	2	1	1	1	1	1	1	1	1
FALSE	High	Master Protein	A0A088A2P5	Eukaryotic translation initiation factor 6 OS=Apis mellifera OX=7460 GN=eIF6 PE=3 SV=1		0	FALSE	8.666	6	1	1	1	245	26.3	4.74														3.47																				1
FALSE	High	Master Protein	A0A221H962	EvpB family type VI secretion protein OS=Serratia marcescens OX=615 GN=BVG84_09410 PE=4 SV=1		0.003	FALSE	4.047	2	1	1	1	515	57.9	5.14																			2.53
FALSE	High	Master Protein	A0A088ATD5	Exonuclease domain-containing protein OS=Apis mellifera OX=7460 GN=725736 PE=4 SV=1		0	FALSE	7.358	14	2	3	2	177	20.7	8.24																0		2.19		0
FALSE	High	Master Protein	A0A088ASN0	FAA_hydrolase domain-containing protein OS=Apis mellifera OX=7460 PE=4 SV=1		0	FALSE	74.977	67	10	109	10	249	27.5	5.34	24.93	12.79	2.62	4.91		25.38	13.9	3.01	7.25		23.98	3.99	49.86	21.9		24.73	13.47	11.79	21.57		7	5	1	3		6	4	1	2		4	1	7	6
FALSE	High	Master Protein	A9ZSY2	Facilitated trehalose transporter Tret1 OS=Apis mellifera ligustica OX=7469 GN=Tret1 PE=1 SV=1		0	FALSE	48.352	14	6	104	4	502	55.5	8.68	30.75		6.3	1.69	28.35	18.53		29.13	3.33	13.55	3.39			32.84	8.86	25.47	2.97	29.6	14.81	12.48	5		5	1	4	6		6	2	4	2			4
FALSE	High	Master Protein	A0A088A627	F-actin-capping protein subunit alpha OS=Apis mellifera OX=7460 GN=LOC552486 PE=3 SV=1		0	FALSE	44.894	34	6	34	6	288	32.8	5.55	9.52	3.76	5.32	5.04	8.63	1.68	4.4		1.72	7.95	4.36	5.65		5.94		11.01		5.89	1.73	0	3	1	3	2	2	1	1		1	2	3	4		2
FALSE	High	Master Protein	A0A088ALS0	F-actin-capping protein subunit beta OS=Apis mellifera OX=7460 GN=LOC409581 PE=3 SV=1		0	FALSE	61.777	45	8	33	8	273	30.8	5.72	6.63	2.17	2.32	1.81	5.57			2.21	8.69	3.71	2.54	6.69		14	0	7		1.96	7.03	8.52	2	1	1	1	2			1	3	2	2	2		4
FALSE	High	Master Protein	A0A088A7Z4	FAD-binding PCMH-type domain-containing protein OS=Apis mellifera OX=7460 PE=4 SV=1		0	FALSE	75.236	45	11	36	11	470	52.3	7.96	28.64	2.36		0		6.52	19.19	4.99			2.59	0	6.94	3.26		2.47		7.69	2.51		6	2		1		2	7	3			2	1	2	1
FALSE	High	Master Protein	A0A087ZYD0	FAD-binding PCMH-type domain-containing protein OS=Apis mellifera OX=7460 PE=4 SV=1		0	FALSE	5.523	2	1	4	1	1257	140.8	7.3	2.52						0									6.9					1						1
FALSE	High	Master Protein	A0A068J4X4	Farnesoic acid O-methyltransferase OS=Apis mellifera ligustica OX=7469 GN=FAMet PE=2 SV=1		0	FALSE	236.777	86	13	657	1	296	32.2	4.61	79.9	145.53	35.98	45.33	148.16	59.89	198.44	50.56	30.33	96.24	42.6	79.64	394.19	89.07	24.17	50.59	154.05	134.85	56.72	110.11	11	12	8	9	11	10	12	9	7	12	5	10	12	9
FALSE	High	Master Protein	A0A088A0W2	FAS1 domain-containing protein OS=Apis mellifera OX=7460 PE=4 SV=1		0	FALSE	6.889	5	1	2	1	290	32.5	7.34														2.32					2.76															1
FALSE	High	Master Protein	A0A088AG10	FAST_2 domain-containing protein OS=Apis mellifera OX=7460 PE=4 SV=1		0	FALSE	27.997	16	7	26	7	525	61.1	9.06	8.66	0	0	0		5.18	1.78	6.22	0		4.26		0	2.66		8.11	2.39				4	1	2	2		2	1	3	1		2		1	1
FALSE	High	Master Protein	Q76LA3	Fatty acid binding protein OS=Apis mellifera OX=7460 GN=FABP PE=2 SV=1		0	FALSE	7.787	24	2	2	2	135	15.5	5.58									5.28																				2
FALSE	High	Master Protein	Q76LA4	Fatty acid binding protein OS=Apis mellifera OX=7460 GN=FABP PE=2 SV=1		0	FALSE	18.799	26	3	5	3	132	15	6.74				0								3.06	1.65	6.05										1								1	1	2
FALSE	High	Master Protein	D9MWM7	Fatty acyl-CoA reductase OS=Apis mellifera OX=7460 GN=FAR1 PE=2 SV=1		0	FALSE	85.458	37	13	87	13	516	59.1	8.29	42.42	5.56		0	5.26		3.57		3.98	0		0	9.83	14.6	0	50.57	2.92	24.2	23.09		9	3		2	2		1		3	1		1	5	5
FALSE	High	Master Protein	D9MX52	Fatty acyl-CoA reductase OS=Apis mellifera OX=7460 GN=LOC411983 PE=2 SV=1		0	FALSE	205.45	56	25	202	25	541	62	8.18	65.45	28.05	8.64	5.69	5.71	4.13	49.26				22.28	12.54	1.94	45.09	0	95.01	61.94	45.51	64.02	2.26	17	11	5	4	1	1	13				9	6	2	11
FALSE	High	Master Protein	A0A088AD05	Fatty acyl-CoA reductase OS=Apis mellifera OX=7460 PE=3 SV=1		0	FALSE	98.61	62	17	141	17	382	44	9.52	22.31	21.04	5.82	1.86	24.5	1.63	32.16	1.87			13.68	11	6.83	35.85	0	16.82	32.52	9.92	16.82	11.53	9	9	6	3	8	2	12	1			6	5	5	7
FALSE	High	Master Protein	A0A088AD07	Fatty acyl-CoA reductase OS=Apis mellifera OX=7460 PE=3 SV=1		0	FALSE	9.234	5	2	5	2	516	59.8	8.02		2.78					6.12										6.51					1					2
FALSE	High	Master Protein	A0A088A9E4	FCP1 homology domain-containing protein OS=Apis mellifera OX=7460 PE=4 SV=1		0.006	FALSE	3.222	7	1	2	1	314	36.4	9.51					0		0																		1		1
FALSE	High	Master Protein	A0A088AHC4	Fe-ADH domain-containing protein OS=Apis mellifera OX=7460 PE=4 SV=1		0	FALSE	40.423	52	7	41	5	149	16.6	9.25	20.92			4.92	2.39	6.08	3.02	2.58			16.55	4.42	2.09	6.05		7.59	2.57	12.62	9.93	2.41	6			2	1	2	1	1			4	3	1	2
FALSE	High	Master Protein	A0A088AHC6	Fe-ADH domain-containing protein OS=Apis mellifera OX=7460 PE=4 SV=1		0	FALSE	29.798	12	4	58	1	431	47.5	7.65	25.15	4.5	0	4.87	5.19	15.79	10.09	0			9.67	4.54	4.24	2.7		15.05	7.77	13.98	16.29	7.91	3	2	1	1	2	3	2	1			3	2	1	1
FALSE	High	Master Protein	A0A088AHC5	Fe-ADH domain-containing protein OS=Apis mellifera OX=7460 PE=4 SV=1		0	FALSE	79.005	88	12	96	11	178	19.7	7.61	56.04	4.5	0	8.04	2.79	14.57	7.24	8.83			12.16	2.49	4.24	33.64		39.53	2.64	13.34	22.28	7.57	9	1	1	4	1	6	3	4			5	3	1	7
FALSE	High	Master Protein	A0A088A9A9	FERM domain-containing protein OS=Apis mellifera OX=7460 PE=4 SV=1		0	FALSE	254.165	55	34	451	34	632	74.6	6.28	67.37	48.62	45.42	73.74	36.41	46.19	45.8	76.64	60.03	45.38	45.86	39.93	20.1	119.67	5.86	63.81	29.04	51.94	67.71	39.84	17	19	18	24	10	13	15	22	16	15	11	16	8	22
FALSE	High	Master Protein	A0A088AEI6	FERM domain-containing protein OS=Apis mellifera OX=7460 PE=4 SV=1		0	FALSE	621.851	59	78	585	78	2042	217.9	5.81	149.08	48	2.81	36.23	184.92	114.82	51.32	28.98	4.04	79.03	163.06	62.55	7.15	123.67	6.78	128.65	64.19	117.6	106.14	83.28	39	19	1	18	46	35	24	12	2	30	32	24	5	27
FALSE	High	Master Protein	A0A087ZZ33	FERM domain-containing protein OS=Apis mellifera OX=7460 PE=4 SV=1		0	FALSE	115.923	24	16	93	16	921	104.9	8.28	25.6	9.22	1.87	1.67	12.83	7.58	9.25	0	3.33	4.55	9.85	11.49	0	24.06	0	10.16	17.21	24.26	18.44	20.06	6	6	2	3	5	4	4	2	1	2	3	5	1	5
FALSE	High	Master Protein	A0A087ZW75	FERM domain-containing protein OS=Apis mellifera OX=7460 PE=4 SV=1		0	FALSE	30.117	4	4	28	4	1366	156.5	8.84	8.08		0		2.88	4.74	5.21		2.11		4.4			7.28		3.02	9.54	6.43	2.68		2		1		1	1	3		1		2			1
FALSE	High	Master Protein	A0A087ZU01	Ferrochelatase OS=Apis mellifera OX=7460 GN=ferrochelatase PE=3 SV=1		0	FALSE	109.175	48	15	192	15	397	45.5	8.48	62.64	21.78	18.98	9.93	21.67	19.28	33.98	23.63	17.48	9.51	2.83	7.54	18.64	22.93	0	17.97	20.44	46.88	26.78	24.04	11	10	9	7	6	5	7	9	7	3	2	4	7	7
FALSE	High	Master Protein	A0A088A280	FHA domain-containing protein OS=Apis mellifera OX=7460 GN=LOC413046 PE=4 SV=1		0	FALSE	5.777	3	2	23	2	795	91.4	4.97							0	0			0	0		0	0												1	1			1	1		1
FALSE	High	Master Protein	A0A087ZYL7	Fibrillar collagen NC1 domain-containing protein OS=Apis mellifera OX=7460 GN=LOC410038 PE=4 SV=1		0	FALSE	5.149	1	1	1	1	1501	148.2	8.62													2.26																				1
FALSE	High	Master Protein	A0A088AUX9	FIP-RBD domain-containing protein OS=Apis mellifera OX=7460 GN=Rip11 PE=4 SV=1		0.005	FALSE	3.557	3	1	1	1	530	59.7	8.47						1.88																				1
FALSE	High	Master Protein	A0A088AFF7	Flavin-containing monooxygenase OS=Apis mellifera OX=7460 PE=3 SV=1		0	FALSE	11.691	6	2	3	2	427	48.8	8.09														3.24		5.33																		1
FALSE	High	Master Protein	A0A088AJJ1	Flavodoxin-like domain-containing protein OS=Apis mellifera OX=7460 PE=4 SV=1		0	FALSE	40.567	59	6	23	6	190	21.2	4.78	7.25	1.97	1.68		7.92		7.88	1.98						10.27	0	5.36	7.97	2.39			2	2	1		2		3	1						2
FALSE	High	Master Protein	A0A088ASE8	Flavokinase domain-containing protein OS=Apis mellifera OX=7460 GN=LOC552134 PE=4 SV=1		0	FALSE	42.056	44	5	34	5	147	16.9	8.05	16.88	4.59		4.49		5.58	2.73	2.72	4.3			2.77	1.73	14.95		10.47			6.75		4	2		3		2	1	1	3			2	1	2
FALSE	High	Master Protein	A0A087ZPP8	Flavoprotein domain-containing protein OS=Apis mellifera OX=7460 GN=LOC412189 PE=4 SV=1		0.001	FALSE	4.905	8	1	2	1	198	22	7.21																2.98				3
FALSE	High	Master Protein	A0A088A5Z9	FMN hydroxy acid dehydrogenase domain-containing protein OS=Apis mellifera OX=7460 GN=LOC552771 PE=3 SV=1		0	FALSE	120.682	49	18	210	18	367	40.5	8.81	71.68	0	17.28	17.77	14.02	47.29	0	42.45	10.58	2.38	11.29	4.47		41.99		43.69		68.31	47.23	14	13	1	6	9	5	13	1	12	4	2	5	4		8
FALSE	High	Master Protein	A0A088AP60	Fork-head domain-containing protein OS=Apis mellifera OX=7460 PE=4 SV=1		0	FALSE	8.901	5	1	1	1	512	53.8	8.65																5.13
FALSE	High	Master Protein	A0A087ZPQ8	Fructose-bisphosphate aldolase OS=Apis mellifera OX=7460 PE=3 SV=1		0	FALSE	253.71	70	23	617	23	387	41.7	8.12	124.75	57.6	27.43	102.44	57.89	102.52	79.14	69.35	47.45	55.01	94	94.15	239.51	215.84	13.11	119.87	32.71	67.41	125.67	57.95	15	11	7	15	8	15	13	13	8	10	14	14	16	15
FALSE	High	Master Protein	A0A088ADU2	Fucosidase_C domain-containing protein OS=Apis mellifera OX=7460 GN=Fuca PE=3 SV=1		0	FALSE	7.727	5	2	4	2	471	55.7	6.47		0											2.06	2.3					2.05			1											1	1
FALSE	High	Master Protein	A0A088A8E6	G protein gamma domain-containing protein OS=Apis mellifera OX=7460 PE=4 SV=1		0.004	FALSE	3.913	0	1	24	1	2056	238.8	8.15	3.81	0		0	3.68	1.83	3.55	0			0	0				0	1.52	1.62	1.87	0	1	1		1	1	1	1	1			1	1
FALSE	High	Master Protein	A0A088A7S9	Gal_mutarotas_2 domain-containing protein OS=Apis mellifera OX=7460 GN=LOC551205 PE=3 SV=1		0	FALSE	39.455	14	8	12	8	925	106.8	6.27	2.37						5.43	0				0		3.44		7.9		2.23			1						2	1				2		1
FALSE	High	Master Protein	A0A087ZZX4	Galectin OS=Apis mellifera OX=7460 GN=galectin1 PE=4 SV=1		0	FALSE	20.564	10	3	9	3	482	49.8	5.2		2.89		11.6			3.4	3.52				1.85								4.35		1		2			1	1				1
FALSE	High	Master Protein	A0A087ZZA2	GAR domain-containing protein OS=Apis mellifera OX=7460 PE=4 SV=1		0	FALSE	14.882	8	4	5	4	704	76.4	10.05	0						0							2.18			2.22				1						1							1
FALSE	High	Master Protein	A0A087ZZN6	GB1/RHD3-type G domain-containing protein OS=Apis mellifera OX=7460 GN=atl PE=4 SV=1		0	FALSE	128.188	38	21	173	21	633	72.3	8.6	53.15	22.01	0	0	13.71	33.01	32.4	4.08	0	3.69	16.77	7.96	2.8	21.82		51.5	54.95	27.28	33.6	7.47	11	7	1	3	6	8	11	3	1	4	3	4	1	7
FALSE	High	Master Protein	K0FDG6	GB12811-like protein (Fragment) OS=Apis mellifera OX=7460 PE=2 SV=1		0	FALSE	8.808	7	1	134	1	149	14.7	4.88	10.55	9.23	10.54	21.68	14.27	4.78		13.21	5.25	5.08	91.18		55.5	9.46	11.28	4.9	6.84	4.97	10.26	13.87	1	1	1	1	1	1		1	1	1	1		1	1
FALSE	High	Master Protein	H9K9P8	GFO_IDH_MocA domain-containing protein OS=Apis mellifera OX=7460 GN=LOC412231 PE=4 SV=1		0	FALSE	140.085	71	19	139	19	331	36.9	6.52	82.17			10.84	4.56	52.62		4.95	20.01	11.26	0	2.42	3.45	12.27		96.35	0	5.81	70.69	4.23	13			6	2	7		3	7	3	1	3	2	5
FALSE	High	Master Protein	A0A088AA33	GGACT domain-containing protein OS=Apis mellifera OX=7460 PE=4 SV=1		0	FALSE	46.071	59	8	48	8	172	20.1	6.39	24.68	1.7		0	1.65	8.04	1.93	0	0	0	4.66	2.2	1.82	0		7.41		1.67	2.07	0	6	1		1	2	3	2	2	1	1	1	1	1	1
FALSE	High	Master Protein	A0A088A2A8	Gln-synt_C domain-containing protein OS=Apis mellifera OX=7460 GN=GlnS PE=3 SV=1		0	FALSE	217.328	69	19	236	19	405	45.3	8.09	136.85	12.05	0	17.38	15.69	54.47	38.03	14.37	2	7.81	13.77	4.71	10.81	85.48	0	162.37	18	15.42	36.98	6.87	16	3	1	6	5	12	6	6	1	2	6	4	7	10
FALSE	High	Master Protein	Q14SN0	Globin 1 OS=Apis mellifera OX=7460 GN=glob1 PE=2 SV=1		0	FALSE	77.182	54	11	73	11	171	19.5	8.59	14.99	19.86	2.01	34.96	3.6	3.66	30.21	3.91			16.85	28.06	25.18	13.22		3.64	6.54		3.05	11.17	3	4	1	8	1	1	4	1			5	6	5	2
FALSE	High	Master Protein	A0A088AME4	GLTP domain-containing protein OS=Apis mellifera OX=7460 GN=LOC410533 PE=4 SV=1		0	FALSE	10.322	19	3	3	3	211	24.6	6.35									0					2.82															1					2
FALSE	High	Master Protein	A0A087ZZS2	Glucosamine 6-phosphate N-acetyltransferase OS=Apis mellifera OX=7460 GN=LOC411757 PE=3 SV=1		0	FALSE	11.314	15	2	2	2	189	22	7.49	4.41													1.96							1													1
FALSE	High	Master Protein	A0A087ZPX4	Glucosamine-6-phosphate isomerase OS=Apis mellifera OX=7460 GN=Oscillin PE=3 SV=1		0	FALSE	7.287	4	1	3	1	279	31.7	6.46												2.16		6.11																		1		1
FALSE	High	Master Protein	A0A0B4J2M6	Glucose-6-phosphate 1-dehydrogenase OS=Apis mellifera OX=7460 GN=LOC725325 PE=3 SV=1		0	FALSE	51.215	29	11	24	11	518	60.2	6.81	16.94					0					2.53			7.64		15.55			6.76		6					1					1			3
FALSE	High	Master Protein	A0A0G8BG45	Glucose-6-phosphate 1-dehydrogenase OS=Serratia marcescens OX=615 GN=zwf PE=3 SV=1		0	FALSE	6.936	4	2	3	2	491	55.8	6.49			4.55																				2
FALSE	High	Master Protein	A0A087ZS11	Glucose-6-phosphate 1-epimerase OS=Apis mellifera OX=7460 GN=LOC727456 PE=3 SV=1		0	FALSE	18.166	22	3	10	3	278	31.9	7.5	0			2.46	0				0	2.65						2.73				0	1			2	1				1	1
FALSE	High	Master Protein	A0A087ZPV4	Glucose-6-phosphate isomerase OS=Apis mellifera OX=7460 GN=LOC551154 PE=3 SV=1		0	FALSE	37.61	21	8	29	8	557	62.9	7.91		2.38		10.47	3.03		5.08	2.61	2.15	9.48		0	5.63	10.24					2.13			1		6	1		3	2	1	3		1	3	3
FALSE	High	Master Protein	A0A0G3SR84	Glucose-6-phosphate isomerase OS=Serratia marcescens OX=615 GN=pgi PE=3 SV=1		0.001	FALSE	4.991	3	1	1	1	548	61.1	6.49			2.41																				1
FALSE	High	Master Protein	A0A088APM4	Glucosylceramidase OS=Apis mellifera OX=7460 GN=LOC409708 PE=3 SV=1		0	FALSE	22.317	13	5	10	4	522	59.3	5.57	0		8.93								0	1.69									1		4								1	1
FALSE	High	Master Protein	A0A088AH78	GLUE N-terminal domain-containing protein OS=Apis mellifera OX=7460 GN=Vps36 PE=4 SV=1		0	FALSE	7.522	4	1	5	1	402	45.9	5.97	2.37															3.18		2.11		0	1
FALSE	High	Master Protein	A0A088A349	Glutamine amidotransferase type-1 domain-containing protein OS=Apis mellifera OX=7460 PE=3 SV=1		0	FALSE	7.018	1	1	2	1	1323	147.7	6.4	3.07															2.28					1
FALSE	High	Master Protein	A0A088A6Y8	Glutamine amidotransferase type-2 domain-containing protein OS=Apis mellifera OX=7460 PE=4 SV=1		0	FALSE	425.345	43	55	197	55	1909	211.9	7.34	211.48			0	3.34	32.59		8.76	0	6.99	12.08	0	0	79.17		160.76	2.78	11.3	34.49	2.7	39			1	3	13		4	1	3	5	1	1	17
FALSE	High	Master Protein	A0A2G4QJ65	Glutamine synthetase OS=Serratia marcescens OX=615 GN=glnA PE=3 SV=1		0	FALSE	9.395	6	2	2	2	469	51.8	5.34			3.68																				2
FALSE	High	Master Protein	A0A088AC76	Glutamyl-tRNA(Gln) amidotransferase subunit A, mitochondrial OS=Apis mellifera OX=7460 GN=gatA PE=3 SV=1		0	FALSE	7.827	3	1	1	1	518	57.8	7.21	3.79																				1
FALSE	High	Master Protein	A0A087ZS80	Glutaredoxin domain-containing protein OS=Apis mellifera OX=7460 GN=Grx1 PE=4 SV=1		0	FALSE	22.021	45	4	11	4	98	10.9	6.52	9.93			2.43								0	0	10.85							3			1								1	1	3
FALSE	High	Master Protein	A0A088A6K7	Glutaredoxin domain-containing protein OS=Apis mellifera OX=7460 GN=LOC551916 PE=4 SV=1		0	FALSE	12.626	26	4	6	4	192	21.9	4.37		0										1.7	0	3.61								1										2	1	2
FALSE	High	Master Protein	A0A088A226	Glutaredoxin OS=Apis mellifera OX=7460 GN=Grx2 PE=3 SV=1		0	FALSE	39.99	32	4	19	4	133	15	7.99	9.39					3.45					7.09	6.07	6.19	7.36		5.07			0		3					1					2	2	3	2
FALSE	High	Master Protein	Q7YXM2	Glutathione peroxidase OS=Apis mellifera ligustica OX=7469 GN=Gtpx-1 PE=2 SV=1		0	FALSE	73.921	71	11	96	11	168	19.1	7.78	33.21	5.31	0	17.17	0	6.07	5.19		9.84	2.24	15.02	8.11	10.82	7.5		22.23	1.66	8.25	4.22	2.33	8	3	2	7	1	2	4		5	3	6	5	4	3
FALSE	High	Master Protein	A0A088AB47	Glutathione peroxidase OS=Apis mellifera OX=7460 GN=Gtpx2 PE=3 SV=1		0	FALSE	5.505	13	2	3	2	201	23.1	5.91				1.75							0													1							1
FALSE	High	Master Protein	A0A0P0Q833	Glutathione peroxidase OS=Serratia marcescens OX=615 GN=AR325_01290 PE=4 SV=1		0.002	FALSE	4.233	9	1	1	1	243	26.9	5.87			0																				1
FALSE	High	Master Protein	C3VMN1	Glutathione S-transferase S1 OS=Apis mellifera OX=7460 GN=GstS1 PE=2 SV=1		0	FALSE	163.693	70	18	197	18	204	23.7	8.81	63.59	2.55	8.67	21.84	17.88	22.5		23.91	41.26	15.33	4.45	10.47	22.52	93.61	2.16	69.49	2.41	16.13	27.99	11.5	11	1	4	6	4	5		6	9	5	2	3	6	12
FALSE	High	Master Protein	A0A087ZPS0	Glutathione synthetase OS=Apis mellifera OX=7460 GN=LOC411372 PE=3 SV=1		0	FALSE	22.232	14	5	9	5	481	55	7.44	10.51													0		2.36					4													2
FALSE	High	Master Protein	V5T6H1	Glyceraldehyde 3-phosphate dehydrogenase OS=Lactobacillus helsingborgensis OX=1218494 GN=gap PE=3 SV=1		0	FALSE	65.31	35	10	39	9	338	36.3	6.05		0	40.09	1.8				38.73				0	2.02									1	9	2				8				1	2
FALSE	High	Master Protein	N0BKW2	Glyceraldehyde-3-phosphate dehydrogenase (Fragment) OS=Pectobacterium carotovorum subsp. carotovorum OX=555 GN=gapA PE=4 SV=1		0	FALSE	16.031	34	3	37	2	136	14.2	8.47	2.36	4.28	9.97	5.88	2.27	2.13	4.32	6.86	4.13	4.19	0	3.93	5.71	6.16	0	2.1		2.25	7.08	2.17	1	1	2	2	1	1	1	2	1	1	1	1	1	1
FALSE	High	Master Protein	R0MC05	Glyceraldehyde-3-phosphate dehydrogenase 2 OS=Nosema bombycis (strain CQ1 / CVCC 102059) OX=578461 GN=G3P2 PE=4 SV=1		0.006	FALSE	3.312	7	1	1	1	203	22.6	8.38												2.73																				1
FALSE	High	Master Protein	A0A088AHC8	Glyceraldehyde-3-phosphate dehydrogenase OS=Apis mellifera OX=7460 GN=Gapdh PE=2 SV=1		0	FALSE	143.712	64	14	486	12	333	35.9	8.02	57.8	110.41	22.74	85.29	56.54	71.68	99.03	73.78	54.2	61.3	18.42	136.78	179.72	223.76	0	41.99	29.93	46.73	71.87	26.2	8	12	10	12	9	11	11	11	8	9	7	12	11	11
FALSE	High	Master Protein	V5T887	Glyceraldehyde-3-phosphate dehydrogenase OS=Lactobacillus apinorum OX=1218495 GN=gap-3 PE=3 SV=1		0	FALSE	6.762	6	2	9	1	337	36.4	5.25		0	2.63	0				5.05				0	2.22							1.92		1	2	1				1				1	1
FALSE	High	Master Protein	A0A0P0QFJ0	Glyceraldehyde-3-phosphate dehydrogenase OS=Serratia marcescens OX=615 GN=AR325_16545 PE=3 SV=1		0	FALSE	27.148	21	5	53	4	331	35.5	6.81	2.36	4.28	12.72	8.23	2.27	2.13	6.25	12.23	4.13	4.19	0	10.95	13.32	10.64	0	3.83		2.25	7.99	4.88	1	1	3	2	1	1	2	3	2	1	1	2	3	2
FALSE	High	Master Protein	O61368	Glycerol-3-phosphate dehydrogenase [NAD(+)] OS=Apis mellifera OX=7460 GN=Gpdh PE=3 SV=1		0	FALSE	237.775	78	23	441	23	363	40.1	7.06	74.87	113.27	12.34	53.01	36.06	37.99	123.52	47.16	59.9	34.17	22.5	43.83	25.17	205.54	0	83.31	83.47	35.41	74.07	51.01	12	17	7	13	11	9	20	12	11	9	4	8	5	14
FALSE	High	Master Protein	A0A087ZRH2	Glycerol-3-phosphate dehydrogenase [NAD(+)] OS=Apis mellifera OX=7460 PE=3 SV=1		0	FALSE	15.559	18	4	6	4	285	31.2	5.57		1.75											4.2									1											3
FALSE	High	Master Protein	A0A087ZSL0	Glycerol-3-phosphate dehydrogenase OS=Apis mellifera OX=7460 PE=3 SV=1		0	FALSE	366.374	58	37	917	37	753	84.2	6.81	176.92	104.47	188.59	69.44	131.14	110.89	183.89	234.13	141.13	54.57	64.11	51.28	66.07	173.27	63.9	125.04	128.44	176.03	96.95	85.18	28	22	30	20	23	26	30	33	28	17	13	18	18	19
FALSE	High	Master Protein	A0A086FGK8	Glycine zipper 2TM domain-containing protein OS=Serratia marcescens OX=615 GN=slyB PE=4 SV=1		0	FALSE	8.284	11	1	1	1	154	15.4	9.44			3.79																				1
FALSE	High	Master Protein	A0A087ZUC1	Glyco_18 domain-containing protein OS=Apis mellifera OX=7460 GN=100577156 PE=4 SV=1		0	FALSE	176.441	58	18	285	18	390	43.8	6.27	118.62		4.08	41.19		16.93		39.54	70.03	2.46	7.39		214.66	35.98		35.88		2.72		1.8	13		3	12		6		10	12	2	3		14	6
FALSE	High	Master Protein	A0A088AMK2	Glyco_18 domain-containing protein OS=Apis mellifera OX=7460 PE=4 SV=1		0	FALSE	188.256	54	18	452	18	449	50.1	8.44	149.15	83.49	20.92	67.9	14.16	117.84	117.99	3.27	5.97	25.6	72.03	27.15	25.92	117.35	1.68	51.44	79.34	45.99	81.84	27.62	14	14	6	13	4	15	15	2	2	6	7	7	8	12
FALSE	High	Master Protein	A0A088A3B7	Glyco_transf_20 domain-containing protein OS=Apis mellifera OX=7460 PE=4 SV=1		0	FALSE	304.428	54	37	519	37	771	87.2	6.62	192.61		31.41	71.54	61	91.06	11.51	148.09	71.45	58.54	25.41	27.43	11.65	149.79	18.52	151.42	5.88	118.31	105.52	48.58	31		14	22	15	19	4	26	17	14	9	10	6	22
FALSE	High	Master Protein	A0A088ARU9	Glycogen [starch] synthase OS=Apis mellifera OX=7460 GN=LOC552328 PE=3 SV=1		0	FALSE	6.201	3	1	2	1	692	79.6	6.42						3.01														2.07						1
FALSE	High	Master Protein	A0A087ZVX4	GMC_OxRdtase_N domain-containing protein OS=Apis mellifera OX=7460 GN=GMCOX12 PE=4 SV=1		0	FALSE	11.463	6	2	3	2	622	69.4	6.96										2.67										2.76										2
FALSE	High	Master Protein	A0A088AJV1	GMC_OxRdtase_N domain-containing protein OS=Apis mellifera OX=7460 GN=LOC410744 PE=3 SV=1		0.002	FALSE	4.33	2	1	2	1	625	69.2	9.36				0	0																			1	1
FALSE	High	Master Protein	A0A087ZPR9	GMP reductase OS=Apis mellifera OX=7460 GN=LOC552316 PE=3 SV=1		0	FALSE	17.371	12	3	8	3	349	37.9	7.39						2.79	6.27	2.58						2.86		0			2.74							1	2	1						1
FALSE	High	Master Protein	A0A087ZP87	GOLD domain-containing protein OS=Apis mellifera OX=7460 GN=102655603 PE=3 SV=1		0	FALSE	13.995	25	3	7	3	202	23.3	6.52				0	1.87		4.74							2.41			3.63							1	1		2							1
FALSE	High	Master Protein	A0A088AGB1	GOLD domain-containing protein OS=Apis mellifera OX=7460 GN=LOC412554 PE=3 SV=1		0	FALSE	54.471	38	6	38	6	215	25.3	7.01	13.19		7.91	2.56	8.49	3.55	16.05	8.06	5.28		0	4.45	2.57	17.32	2.14	3.36	14.17	5.44	12.75	3.3	2		2	1	2	1	3	2	1		1	2	1	3
FALSE	High	Master Protein	A0A088ANQ5	GOLD domain-containing protein OS=Apis mellifera OX=7460 GN=LOC552602 PE=3 SV=1		0	FALSE	27.534	30	5	38	5	205	23.4	5.62	16.55	10.66	6.44	3.6			9.55			2.82	2.71	6.22	4.4	11.87		2.13	8.55	2.57			4	3	2	2			3			1	1	2	1	3
FALSE	High	Master Protein	A0A087ZNT8	GOLD domain-containing protein OS=Apis mellifera OX=7460 PE=3 SV=1		0	FALSE	48.322	25	6	83	6	202	23.4	7.33	23.08	7.94	12.35	8.14	11.48	14.04	21.79	8.98	3.83	2.96	3.53	0	3.46	26.91	2.67	18.88	23.64	12.21	12.64	6.99	3	2	3	3	1	2	4	2	1	1	3	1	2	4
FALSE	High	Master Protein	A0A087ZSB1	Golgi apparatus membrane protein TVP23 homolog OS=Apis mellifera OX=7460 GN=LOC408503 PE=3 SV=1		0.003	FALSE	4.01	5	1	1	1	215	24.4	8.7											2.29																				1
FALSE	High	Master Protein	A0A088AL45	GPI-anchor transamidase OS=Apis mellifera OX=7460 PE=3 SV=1		0	FALSE	6.077	6	1	3	1	336	38.7	7.52	3.04				2.09		0														1				1		1
FALSE	High	Master Protein	A0A088AHI6	GP-PDE domain-containing protein OS=Apis mellifera OX=7460 PE=4 SV=1		0	FALSE	29.212	20	4	16	4	273	32.2	8.35	6.69	2.7	1.87	1.77	3.02		3.07				3.1	6.4	2.87	6.72			3.69	3.78			2	1	1	1	1		1				1	2	1	1
FALSE	High	Master Protein	A0A088AP70	GRAM domain-containing protein OS=Apis mellifera OX=7460 GN=LOC410012 PE=4 SV=1		0	FALSE	6.136	14	2	3	2	295	32.6	7.08												2.39				3.42																1
FALSE	High	Master Protein	A0A088A5B9	GRASP55_65 domain-containing protein OS=Apis mellifera OX=7460 GN=LOC409571 PE=4 SV=1		0.005	FALSE	3.645	6	1	1	1	432	46.6	5.33	2.86																				1
FALSE	High	Master Protein	A0A088AGJ6	GrpE protein homolog OS=Apis mellifera OX=7460 PE=3 SV=1		0	FALSE	34.486	32	6	19	6	232	26.4	8.1	5.61		2.37	1.93			0	0			13.56	1.75	1.93	6.74		5.83		2.53			3		1	1			2	1			3	1	1	2
FALSE	High	Master Protein	A0A088A654	GST C-terminal domain-containing protein OS=Apis mellifera OX=7460 GN=100577000 PE=4 SV=1		0	FALSE	10.203	20	3	4	3	171	20.1	5.21	1.65	0												1.94		1.65					1	1												1
FALSE	High	Master Protein	A0A088ADT5	GST N-terminal domain-containing protein OS=Apis mellifera OX=7460 GN=GstU1 PE=4 SV=1		0	FALSE	10.466	33	2	7	2	67	7.7	4.83	3.14	3.23				2.33								4.26		4.27			4.01		1	1				1								1
FALSE	High	Master Protein	A0A088AI98	GST N-terminal domain-containing protein OS=Apis mellifera OX=7460 PE=3 SV=1		0	FALSE	8.549	10	2	3	2	218	25.2	6.86	5.03															0					2
FALSE	High	Master Protein	A0A0B4J2L9	GTP:AMP phosphotransferase, mitochondrial OS=Apis mellifera OX=7460 GN=Adk3 PE=3 SV=1		0	FALSE	10.424	17	3	3	3	224	25.1	9.48	0													2.54		0					1													1
FALSE	High	Master Protein	A0A087ZWI7	GTP-binding nuclear protein OS=Apis mellifera OX=7460 GN=ran PE=3 SV=1		0	FALSE	85.198	63	10	158	10	215	24.6	7.42	50.75	14.74	15.57	28.91	16.53	28.51	24.17	22.81	12.88	16.14	7.64	9.26	4.93	22.1	1.74	37.47	12.74	19.77	36.32	14.05	7	4	4	6	5	5	6	6	5	4	2	3	2	4
FALSE	High	Master Protein	A0A0F9WDS2	Gtp-binding protein OS=Nosema ceranae OX=40302 GN=AAJ76_1700022863 PE=4 SV=1		0.007	FALSE	3.149	4	1	2	1	362	40.6	9.13									0	0																			1	1
FALSE	High	Master Protein	A0A088A648	Guanylate kinase-like domain-containing protein OS=Apis mellifera OX=7460 GN=LOC552023 PE=4 SV=1		0	FALSE	24.529	25	3	9	3	208	23.8	8.12	3.87										2.3		0	12.88		6.17			3.11		1										1		1	2
FALSE	High	Master Protein	A0A087ZSW6	GYF domain-containing protein OS=Apis mellifera OX=7460 GN=LOC410003 PE=4 SV=1		0	FALSE	5.047	1	1	1	1	1389	157.3	8.24	3.88																				1
FALSE	High	Master Protein	A0A087ZRE7	H/ACA ribonucleoprotein complex subunit OS=Apis mellifera OX=7460 GN=LOC413686 PE=3 SV=1		0	FALSE	16.277	18	3	12	3	201	21	11.02	3.13	0			2.04					2.01	4.83	1.64		2.25		2.31	2.09	3.94			1	1			1					1	2	1		1
FALSE	High	Master Protein	A0A088A802	H15 domain-containing protein OS=Apis mellifera OX=7460 PE=3 SV=1		0	FALSE	21.434	19	6	11	6	295	32.9	10.33	7.04					1.78			1.99				0	2.98		5.89		0			3					1			1				1	1
FALSE	High	Master Protein	A0A088A4Q4	HABP4_PAI-RBP1 domain-containing protein OS=Apis mellifera OX=7460 GN=LOC409410 PE=4 SV=1		0	FALSE	39.754	26	6	16	6	414	46.9	8.87		0					5.87			1.65	3.14	9.51		8.38			3.81		4.26	0		1					3			1	1	4		2
FALSE	High	Master Protein	H9KUJ6	HATPase_c domain-containing protein OS=Apis mellifera OX=7460 GN=LOC412150 PE=3 SV=1		0	FALSE	309.864	56	41	375	39	798	92.1	5.07	111.93	39.99	2.64	28.76	23.56	40.8	101.46	20.15	15.99	3.31	42.87	30.35	25.04	132.69		85.4	111.74	60.23	44.73	18.68	22	15	5	16	6	12	26	9	9	2	13	12	9	24
FALSE	High	Master Protein	A0A088A2L4	HATPase_c domain-containing protein OS=Apis mellifera OX=7460 PE=3 SV=1		0	FALSE	287.333	53	34	384	22	755	87.1	5.2	174.12	11.66	4.4	56.37	27.38	45.6	26.75	40.81	14.58	21.52	28.99	33.37	27.19	109	3.63	149.09	21.95	45.82	71.43	25.53	29	4	4	23	9	13	9	14	6	10	7	11	7	16
FALSE	High	Master Protein	A0A087ZQD3	HATPase_c domain-containing protein OS=Apis mellifera OX=7460 PE=3 SV=1		0	FALSE	422.566	61	44	610	30	724	83.4	5.05	217.47	46.42	14.87	80.73	59.19	83.05	81.24	77.71	24.89	34.62	58.66	74.29	52.96	172.19	5.25	166.4	60.09	88.07	108.68	53.28	32	15	9	24	16	19	25	21	6	14	12	18	16	20
FALSE	High	Master Protein	A0A0S1MMB1	Heat shock protein 70-2 OS=Antheraea pernyi OX=7119 PE=2 SV=1		0	FALSE	55.793	12	6	115	1	634	70.1	5.74	25.14	5.96	3.3	3.43	2.17	10.93	15.64			0	60.67	14.44	13.72	44.48	1.65	19.2	20.3	13.25	9.95	8.74	4	2	1	2	1	5	3			1	4	4	5	4
FALSE	High	Master Protein	A0A088AI77	HECT domain-containing protein OS=Apis mellifera OX=7460 GN=As PE=4 SV=1		0	FALSE	20.611	9	4	5	4	863	96.7	5.08	6.15													2.95		2.95					2													1
FALSE	High	Master Protein	A0A088A7J2	Helicase C-terminal domain-containing protein OS=Apis mellifera OX=7460 PE=4 SV=1		0	FALSE	9.483	23	2	10	1	106	12.4	9.92	4.31	3.53		6.08	3.77			3.4		3.06				1.72		1.67		1.67			1	1		1	1			1		1				1
FALSE	High	Master Protein	A0A088AR59	Hepatocyte growth factor-regulated tyrosine kinase substrate OS=Apis mellifera OX=7460 GN=Hrs PE=4 SV=1		0	FALSE	13.813	5	2	2	2	822	91.1	8.12				2.41										3.34										1										1
FALSE	High	Master Protein	A0A088AQM3	HIG1 domain-containing protein OS=Apis mellifera OX=7460 GN=102656599 PE=4 SV=1		0	FALSE	11.755	21	2	16	2	106	11.9	9.36		6.55	10.74	5.96	3.06		3.31	5.86	2.82			2.27	2.55							3.05		1	2	1	1		1	1	1			1	1
FALSE	High	Master Protein	A0A088AP92	Histone deacetylase OS=Apis mellifera OX=7460 GN=HDAC1 PE=3 SV=1		0	FALSE	10.302	6	2	2	2	492	56.1	5.91														6.85																				2
FALSE	High	Master Protein	A0A088A803	Histone H2A OS=Apis mellifera OX=7460 GN=726468 PE=3 SV=1		0	FALSE	113.062	60	5	476	3	124	13.4	10.73	77.7	38.08	15.82	18.59	50.17	53.99	62.51	38.95	34.28	35.34	75.78	106.17	70.73	77.05	19.74	59.02	48.34	60.03	40.21	27.75	4	4	2	4	4	4	4	4	4	4	4	4	4	5
FALSE	High	Master Protein	A0A087ZWQ7	Histone H2A OS=Apis mellifera OX=7460 GN=His2Av PE=3 SV=1		0	FALSE	54.71	54	5	270	3	128	13.4	10.58	23.7	8.11	5.76	3.63	16.16	12.84	21.08	10.14	13.73	12.54	22.78	48.06	30.82	47.81	10.71	16.44	15.63	20.13	16.84	6.03	2	2	1	2	2	2	2	2	2	3	3	4	4	4
FALSE	High	Master Protein	A0A088A824	Histone H2B OS=Apis mellifera OX=7460 GN=725344 PE=3 SV=1		0	FALSE	63.637	42	6	555	4	123	13.7	10.39	83.42	60.08	48.7	41.39	34.22	50.73	54.29	58.18	43.72	28.97	46.53	101.67	87.24	79.73	15.73	52.24	44.79	50.49	38.06	30.68	5	5	6	5	4	4	4	5	4	4	3	3	3	4
FALSE	High	Master Protein	A0A088A805	Histone H2B OS=Apis mellifera OX=7460 GN=726487 PE=3 SV=1		0	FALSE	38.325	28	3	341	1	126	14	10.32	44.98	45.08	21.26	24.25	19.64	23.51	26.5	33.14	26.8	15.08	5.22	1.63	3.86	11.54	0	43.45	29.71	39.88	18.46	23.41	3	3	3	3	2	2	2	3	2	2	1	1	1	1
FALSE	High	Master Protein	A0A088A825	Histone H2B OS=Apis mellifera OX=7460 GN=LOC725238 PE=3 SV=1		0	FALSE	104.668	31	9	264	9	224	23.6	10.49	65.77	65.07	24.33	32.19	38.12	39.86	71.26	31.88	37.31	35	20.81	22.42	13.61	76.36	8.48	46.99	48.86	42.91	21.26	33.63	8	8	5	6	3	5	7	7	5	6	3	3	2	5
FALSE	High	Master Protein	H9K244	Histone H3 OS=Apis mellifera OX=7460 GN=LOC726542 PE=3 SV=1		0	FALSE	83.15	52	7	250	1	136	15.4	11.27	50.2	22.7	11.45	3.71	39.65	19.57	21.62	22.95	12.77	5.56	17.74	17.71	46.81	43.87	7.65	54.65	42.51	21.16	40.62	19.45	6	6	4	2	6	6	5	6	6	3	4	5	4	5
FALSE	High	Master Protein	H9K759	Histone H3 OS=Apis mellifera OX=7460 GN=LOC726692 PE=3 SV=1		0	FALSE	51.452	52	7	235	1	136	15.3	11.27	58.27	31.94	11.45	3.71	36.12	16.18	19.2	24.03	12.77	5.56	18.89	21.68	33.52	43.08	7.65	33.89	43.53	21.16	21.53	9.39	6	6	5	3	6	6	5	6	5	4	4	5	4	5
FALSE	High	Master Protein	H9KL77	Histone H4 OS=Apis mellifera OX=7460 GN=724757 PE=3 SV=1		0	FALSE	122.564	53	9	840	9	103	11.4	11.36	119.4	116.7	70.58	54.31	83.3	66.31	104.71	91.83	85.25	58.58	228.05	58.9	129.36	463.13	37.86	90.86	85.15	112.16	78.34	56.02	8	9	8	7	7	8	8	8	7	6	4	6	4	9
FALSE	High	Master Protein	A0A088ANV4	HIT domain-containing protein OS=Apis mellifera OX=7460 GN=LOC552803 PE=4 SV=1		0	FALSE	5.947	8	1	1	1	142	16.8	8.73														3.22																				1
FALSE	High	Master Protein	A0A088AA27	HIT domain-containing protein OS=Apis mellifera OX=7460 PE=4 SV=1		0	FALSE	43.123	40	3	57	3	126	14	7.59	23.67	14.29	3.94	14.64	3.82	13.33	15.67	9.06	7.07	6.2		11.56	6.72	2.87		10.03	15.81	13.59	16.19	7.1	3	2	1	2	1	1	2	2	1	1		2	2	1
FALSE	High	Master Protein	A0A088AV07	HMA domain-containing protein OS=Apis mellifera OX=7460 GN=LOC725138 PE=4 SV=1		0.001	FALSE	4.937	24	1	3	1	72	8	6.54	2.11	0				0															1	1				1
FALSE	High	Master Protein	A0A088AH79	HMG box domain-containing protein OS=Apis mellifera OX=7460 GN=LOC412077 PE=4 SV=1		0	FALSE	5.436	3	1	1	1	718	79.4	7.06	2.15																				1
FALSE	High	Master Protein	B1A4E1	HrcR OS=Pectobacterium carotovorum subsp. carotovorum OX=555 GN=hrcR PE=3 SV=1		0	FALSE	5.528	4	1	9	1	217	23.9	5.8		4.19	8.1	0			4.74															1	1	1			1
FALSE	High	Master Protein	A0A088A417	HTH La-type RNA-binding domain-containing protein OS=Apis mellifera OX=7460 GN=larp PE=4 SV=1		0.005	FALSE	3.832	2	1	1	1	1104	126.5	8.92																	2.08
FALSE	High	Master Protein	A0A087ZV67	HTH La-type RNA-binding domain-containing protein OS=Apis mellifera OX=7460 GN=LOC411476 PE=4 SV=1		0	FALSE	38.831	10	4	9	4	662	71.3	6.99	16.03			0										4.29		5.94					3			1										1
FALSE	High	Master Protein	Q10416	Hymenoptaecin OS=Apis mellifera OX=7460 PE=2 SV=1		0	FALSE	10.261	37	4	9	4	129	14.5	9.42				1.82						11.71				4.17										1						3				2
FALSE	High	Master Protein	A0A088AEI7	I/LWEQ domain-containing protein OS=Apis mellifera OX=7460 PE=4 SV=1		0	FALSE	115.281	44	15	120	15	490	53.3	6.4	40.33	2.22		6.33	30.42	30.02	14.72	3.08		5.63	19.84	8.26	0	36.53	0	21.67	12.69	26.23	15.13	7.61	8	3		3	8	8	6	3		3	7	4	1	7
FALSE	High	Master Protein	A0A096XH51	Icarapin variant 1 (Fragment) OS=Apis mellifera carnica OX=88217 GN=icarapin PE=2 SV=1		0	FALSE	34.435	30	6	30	6	204	22.7	4.56	2.3	2.39			7.04	3.01	4.44			18.01	2.3		4.49	5.73	2.1		1.93		3.87	6.96	1	2			2	1	3			5	1		2	2
FALSE	High	Master Protein	A0A087ZP77	IF3_N domain-containing protein OS=Apis mellifera OX=7460 PE=4 SV=1		0	FALSE	7.4	9	2	10	2	227	26.8	9.61	2.37			0	2.53				2.53	2.03			0			2.42		2.35	0	0	1			1	1				1	1			1
FALSE	High	Master Protein	A0A088A291	Importin N-terminal domain-containing protein OS=Apis mellifera OX=7460 GN=Cas PE=4 SV=1		0	FALSE	5.203	2	1	1	1	967	110.2	5.9	3.19																				1
FALSE	High	Master Protein	A0A087ZMS1	Importin N-terminal domain-containing protein OS=Apis mellifera OX=7460 GN=emb PE=4 SV=1		0	FALSE	73.71	16	12	37	12	1062	122.3	5.6	25.48					3.03	0	3.69	1.63				2.53	8.81		25.29		0	5.39		7					2	3	5	1				1	3
FALSE	High	Master Protein	A0A088AUU1	Importin N-terminal domain-containing protein OS=Apis mellifera OX=7460 GN=Ipo9 PE=4 SV=1		0.001	FALSE	4.998	2	1	1	1	1031	116.1	4.88	2.55																				1
FALSE	High	Master Protein	A0A088A9P3	Importin N-terminal domain-containing protein OS=Apis mellifera OX=7460 GN=LOC412817 PE=4 SV=1		0	FALSE	17.92	5	4	13	4	1080	121.4	4.84	8.9			0		0	0	0								7.5			2.69		4			1		1	1	1
FALSE	High	Master Protein	A0A088AF88	Importin N-terminal domain-containing protein OS=Apis mellifera OX=7460 GN=Ranbp16 PE=4 SV=1		0	FALSE	18.238	4	3	5	3	1100	125.3	6.34	6.25													3.85		2.61					2													2
FALSE	High	Master Protein	A0A087ZMX9	Importin N-terminal domain-containing protein OS=Apis mellifera OX=7460 PE=4 SV=1		0	FALSE	75.472	22	13	51	13	890	98.8	4.86	23.41				2.57	10.04	7.32		0		3.14			14.98		18.7	4.21	7.56	8.02		8				3	4	3		1		1			4
FALSE	High	Master Protein	A0A088ABZ7	Importin N-terminal domain-containing protein OS=Apis mellifera OX=7460 PE=4 SV=1		0	FALSE	34.924	9	6	9	6	1029	117.8	5.03	6.4					0								2.83		7.63	0				3					1								1
FALSE	High	Master Protein	A0A088AFX0	Importin N-terminal domain-containing protein OS=Apis mellifera OX=7460 PE=4 SV=1		0.001	FALSE	4.94	1	1	5	1	1011	115.7	5.34	4.87					1.94		2.02								2.69					1					1		1
FALSE	High	Master Protein	A0A088A0C0	Importin N-terminal domain-containing protein OS=Apis mellifera OX=7460 PE=4 SV=1		0	FALSE	11.521	4	2	2	2	897	101.5	5.3														3.01		2.1																		1
FALSE	High	Master Protein	A0A088ADV7	Importin subunit alpha OS=Apis mellifera OX=7460 GN=Kap-alpha1 PE=3 SV=1		0	FALSE	28.721	12	5	8	5	530	58.7	5.34	8.99					2.17								4.7		3.38					3					1								1
FALSE	High	Master Protein	A0A088ANJ0	Importin subunit alpha OS=Apis mellifera OX=7460 GN=Kap-alpha3 PE=3 SV=1		0	FALSE	56.973	25	6	19	6	516	57.3	5.17	16.32					7.61						2.61	4.24	18.56		14.98			5.67		3					2						1	2	3
FALSE	High	Master Protein	A0A088A2D3	Innexin OS=Apis mellifera OX=7460 GN=inx PE=3 SV=1		0	FALSE	5.941	21	2	5	2	149	17	6.65		0	0	0	1.69																	1	2	1	1
FALSE	High	Master Protein	A0A088A2D4	Innexin OS=Apis mellifera OX=7460 GN=inx PE=3 SV=1		0	FALSE	9.733	9	2	6	2	256	30.1	8.72				1.87			2.04						2.21	3.06			2.4		2.51					1			1						1	1
FALSE	High	Master Protein	A0A088A2C9	Innexin OS=Apis mellifera OX=7460 GN=inx2 PE=3 SV=1		0	FALSE	60.673	26	8	135	8	358	41.5	6.84	24.44	14.52	17.97	15.71	16.93	11.63	28.49	13.23	23.77	4.23	5.1	2.13	7.23	8.4	6.07	24.25	23.36	34.57	15.56	15.88	4	4	6	6	4	3	5	3	5	2	2	1	2	3
FALSE	High	Master Protein	A0A088AID2	Innexin OS=Apis mellifera OX=7460 GN=inx3 PE=3 SV=1		0	FALSE	31.343	31	8	90	8	396	44.6	7.68	7.32	8.09	9.29	11.46	9.32	6.58	13.66	5.84	9.62	2.52	12.93	8.64	13.13	5.06	3.51	12.49	18.45	14.59	7.84	5.31	3	5	4	4	5	5	5	3	3	2	2	3	4	1
FALSE	High	Master Protein	A0A088A2D0	Innexin OS=Apis mellifera OX=7460 GN=inx7 PE=3 SV=1		0	FALSE	62.937	28	8	40	8	408	46.9	7.59	21.06				3.16				15.01					35.68	0	12.54		24.65			4				1				5					7
FALSE	High	Master Protein	A0A088A653	Inosine-5'-monophosphate dehydrogenase OS=Apis mellifera OX=7460 GN=ras PE=3 SV=1		0	FALSE	30.001	20	8	13	8	523	56.6	8.15	2.3			4.1	4.16									2.91	0	2.91		4.99		4.27	1			2	3									2
FALSE	High	Master Protein	A0A088AVE7	Inositol-1-monophosphatase OS=Apis mellifera OX=7460 GN=726463 PE=3 SV=1		0	FALSE	71.019	36	10	156	10	276	30.8	6.43	33.54		9.42	29.92	48.44	13.56		46.36	34.26	24.1	5.01	7.49		21.77	4.15	18.86		9.69	37.83	16.44	7		3	8	9	4		9	8	7	2	2		5
FALSE	High	Master Protein	A0A088A4S7	Inositol-1-monophosphatase OS=Apis mellifera OX=7460 GN=LOC409693 PE=3 SV=1		0	FALSE	14.212	18	3	4	3	272	29.8	5.82				3.67					7.97			1.87												1					2			1
FALSE	High	Master Protein	A0A088AVE6	Inositol-1-monophosphatase OS=Apis mellifera OX=7460 GN=LOC726481 PE=3 SV=1		0	FALSE	66.276	48	10	72	10	284	32.1	6.07	7.98		2.25	2.05	14.83	9.02		11.11	2.22	6.76		1.85				35.16		2.99	38.93	10.48	3		1	2	3	2		4	3	4		2
FALSE	High	Master Protein	A0A088AEN2	Integrin alpha-PS2 OS=Apis mellifera OX=7460 PE=3 SV=1		0	FALSE	222.591	30	35	232	35	1525	172.2	5.86	23.62	25.49	12.43	6.69	70.93	40.5	33.95	17.84	33.59	32.97	36.24	14.75	3.95	48.74	6	19.1	28.74	47	52.69	25.53	6	8	5	7	17	11	11	4	10	11	11	10	3	11
FALSE	High	Master Protein	A0A088A188	Integrin beta OS=Apis mellifera OX=7460 GN=100576742 PE=3 SV=1		0	FALSE	10.14	4	3	3	3	787	89.2	5.69														6.83																				3
FALSE	High	Master Protein	A0A088A788	Integrin beta OS=Apis mellifera OX=7460 PE=3 SV=1		0	FALSE	140.753	39	22	193	22	761	84.9	5.49	18.65	24.82	8.3	2.29	51.27	40.34	29	15.45	26.74	13.81	17.25	8.01	4.81	19.37	1.62	21.05	26.76	45.97	40.85	21.09	6	9	3	3	12	11	9	7	9	7	5	3	3	6
FALSE	High	Master Protein	A0A088ACX9	Integrin_alpha2 domain-containing protein OS=Apis mellifera OX=7460 GN=mew PE=3 SV=1		0	FALSE	22.305	5	5	10	5	1101	123.7	6.18					2.87	0		0			0			5.16		2.36	0	2.19							1	1		2			1			2
FALSE	High	Master Protein	A0A088AKC5	Iso_dh domain-containing protein OS=Apis mellifera OX=7460 GN=LOC410396 PE=4 SV=1		0	FALSE	152.814	53	14	257	14	384	42.4	8.97	74.07	27.53	27.15	28.47	18.55	47.7	44.26	64.92	25.9	7.15	23.12	17.66	33.14	19.45	0	80.56	50.59	84.05	67.42	27.31	10	7	7	8	3	8	10	12	5	2	6	6	7	4
FALSE	High	Master Protein	A0A088AA38	Isochorismatase domain-containing protein OS=Apis mellifera OX=7460 GN=LOC410420 PE=4 SV=1		0	FALSE	54.319	41	7	153	7	203	22.4	8.35	33.58	22.22	2.96	7.52	2.92	18.27	29.34	8.28	8.55		12.05	11.8	14.65	30.9		40.62	32.4	24.45	30.46	2.81	7	7	2	4	1	5	7	2	2		6	4	6	7
FALSE	High	Master Protein	A0A088AAU7	Isocitrate dehydrogenase [NAD] subunit, mitochondrial OS=Apis mellifera OX=7460 GN=LOC409292 PE=3 SV=1		0	FALSE	196.345	56	21	547	20	358	39.1	7.59	137.07	79.97	46.35	46.23	33.27	92.04	73.38	80.03	20.95	5.32	55.76	55.1	61.71	94	0	102.17	80	102.64	97.24	38.05	19	13	12	12	8	16	16	17	10	3	13	14	13	12
FALSE	High	Master Protein	A0A088ABZ1	Isocitrate dehydrogenase [NAD] subunit, mitochondrial OS=Apis mellifera OX=7460 GN=LOC552128 PE=3 SV=1		0	FALSE	104.035	48	13	215	13	374	40.9	8.7	70.46	26.58	5.71	14.78	8.29	30.22	45.85	38.05	10.12		9.58	9.14	21.92	14.66		49.43	37.43	52.4	30.56	9.82	12	8	4	9	4	7	9	10	4		5	4	10	4
FALSE	High	Master Protein	A0A088A1Z9	Isocitrate dehydrogenase [NADP] OS=Apis mellifera OX=7460 PE=3 SV=1		0	FALSE	200.253	69	26	434	26	409	46.6	7.3	149.93	47.05	8.81	32.03	32.91	84.93	31.61	44.2	32.08	18.42	35.43	31.04	12.37	81.54		115.41	20.12	66.19	76.53	33.27	24	13	4	15	9	17	10	11	8	7	11	12	8	12
FALSE	High	Master Protein	A0A093SSK5	Isocitrate dehydrogenase [NADP] OS=Pectobacterium carotovorum subsp. carotovorum OX=555 GN=KP17_00210 PE=4 SV=1		0	FALSE	5.11	4	1	2	1	417	45.9	5.2			4.54																				1
FALSE	High	Master Protein	A0A2G4QGA9	Isocitrate dehydrogenase [NADP] OS=Serratia marcescens OX=615 GN=CS371_09695 PE=4 SV=1		0	FALSE	12.341	4	1	14	1	417	45.7	5.78				0					6.22							9.44			9.83	7.69				1					1
FALSE	High	Master Protein	A0A087ZRF8	J domain-containing protein OS=Apis mellifera OX=7460 GN=LOC408863 PE=4 SV=1		0	FALSE	83.42	55	7	33	7	176	19.9	6.21	48.84	2.55		2.01							2.9	14.31		9.68		6.81					7	1		2							2	5		1
FALSE	High	Master Protein	A0A087ZSR8	J domain-containing protein OS=Apis mellifera OX=7460 GN=LOC408966 PE=4 SV=1		0	FALSE	23.792	13	2	18	2	290	32.6	9.47	5.43	2.18			6.51	5.91	3.66	3.41								4.13	3.44	0	9.5	0	1	1			1	1	1	1
FALSE	High	Master Protein	A0A087ZY83	J domain-containing protein OS=Apis mellifera OX=7460 GN=LOC409991 PE=4 SV=1		0	FALSE	26.328	13	6	38	6	561	64	8.06	3.06	4.23	6.14	0	5.91	2.49	5.38	8.59			5.37	3.76	2.35	7.31		7.88	4.79	6	2.49	2.59	1	2	2	2	3	1	3	3			2	2	3	2
FALSE	High	Master Protein	A0A088A635	J domain-containing protein OS=Apis mellifera OX=7460 GN=LOC411071 PE=4 SV=1		0	FALSE	104.415	64	19	141	19	354	39.1	9.13	41.19	13.04	0	41.55	9.23	23.76	22.18	13.29	5.57	20.43	9.74	1.98	1.68	25.81		31.74	6.71	11.19	42.41	21.11	10	5	2	12	4	7	7	4	2	8	3	3	1	5
FALSE	High	Master Protein	A0A088ABA4	J domain-containing protein OS=Apis mellifera OX=7460 GN=LOC412505 PE=4 SV=1		0	FALSE	18.535	4	3	6	3	761	88.2	6.52	1.89	1.84					0							6.93			2				1	1					1							2
FALSE	High	Master Protein	A0A087ZY94	J domain-containing protein OS=Apis mellifera OX=7460 GN=LOC552151 PE=4 SV=1		0	FALSE	5.432	4	1	1	1	431	50.5	9.14																		2.73
FALSE	High	Master Protein	A0A088AL57	J domain-containing protein OS=Apis mellifera OX=7460 GN=Rme-8 PE=4 SV=1		0.002	FALSE	4.168	1	1	1	1	2231	254.6	7.24	0																				1
FALSE	High	Master Protein	A0A088AEP5	J domain-containing protein OS=Apis mellifera OX=7460 PE=4 SV=1		0	FALSE	21.737	13	2	16	2	223	24.4	5.11	8.58	2.76			0		3.53	2.03			2.97			7.32		0	0	3.45			1	2			1		1	1			1			1
FALSE	High	Master Protein	A0A088AJE9	J domain-containing protein OS=Apis mellifera OX=7460 PE=4 SV=1		0	FALSE	42.96	32	7	22	7	358	40.4	5.85	7.74			1.96			4.53				6.12	3.69	2.14	14.74			2.29				3			1			2				4	2	3	4
FALSE	High	Master Protein	A0A088AUA1	KA1 domain-containing protein OS=Apis mellifera OX=7460 PE=4 SV=1		0	FALSE	15.2	13	1	6	1	135	15.2	8.94	5.35			0	3.68						0			5.41				4.53			1			1	1						1			1
FALSE	High	Master Protein	A0A087ZMR7	KASH domain-containing protein OS=Apis mellifera OX=7460 PE=4 SV=1		0	FALSE	73.553	3	16	26	16	7454	850.8	4.86	4.92				2.02	0	6.09				14.98	0		10.53		4.81	2.18	0		1.73	2				2	1	3				7	2		3
FALSE	High	Master Protein	A0A088AEW6	Kazal-like domain-containing protein OS=Apis mellifera OX=7460 GN=102656354 PE=4 SV=1		0	FALSE	8.839	18	1	1	1	119	12.4	8.54														4.5																				1
FALSE	High	Master Protein	A0A088AI24	Kazal-like domain-containing protein OS=Apis mellifera OX=7460 GN=LOC726470 PE=4 SV=1		0	FALSE	117.512	28	15	37	15	976	107.9	7.2	15.42		0		4.64			3.79	9.12					34.16		9.51		19.64			5		1		2			1	3					7
FALSE	High	Master Protein	A0A088AGZ4	KH domain-containing protein OS=Apis mellifera OX=7460 GN=408710 PE=4 SV=1		0	FALSE	34.145	22	7	35	7	397	45.3	8.84	9.34	2.34		2.39	2.24	7.34	2.09	2.07	2.27	2.22	4.87	0		0		3.8	2.59	2.47	2.97	2.65	2	2		1	2	3	2	1	1	3	4	2		1
FALSE	High	Master Protein	A0A087ZVJ6	KH domain-containing protein OS=Apis mellifera OX=7460 PE=4 SV=1		0	FALSE	38.586	44	6	18	6	143	15.3	7.99	11.44			8.27		4.53				2.73				2.9		7.61	2.44	4.08	0	2.34	2			2		1				1				1
FALSE	High	Master Protein	A0A087ZVJ7	KH domain-containing protein OS=Apis mellifera OX=7460 PE=4 SV=1		0	FALSE	45.506	36	6	31	6	303	30	9.01	14.44			0	0	3.15	0				0			10.47		7.36		0	2.18		5			1	1	2	1				1			4
FALSE	High	Master Protein	A0A088ADI9	KH domain-containing protein OS=Apis mellifera OX=7460 PE=4 SV=1		0	FALSE	14.505	9	3	5	3	321	35.1	7.23				0							2.48			6.39						1.76				1							1			2
FALSE	High	Master Protein	A0A088AV85	KH type-2 domain-containing protein OS=Apis mellifera OX=7460 GN=RpS3 PE=4 SV=1		0	FALSE	144.299	75	17	413	17	242	26.8	9.66	89.98	60.23	23.55	47.79	37.59	37.37	69.15	47.36	26.46	11.45	32.59	53.27	22.76	156.22	7.55	71.24	61.14	45.47	54.25	40.72	15	16	10	13	12	13	15	14	10	4	8	11	7	14
FALSE	High	Master Protein	A0A088A7G3	Kinesin-like protein OS=Apis mellifera OX=7460 PE=3 SV=1		0	FALSE	139.793	27	20	74	20	969	110.3	6.18	33.69	1.81		5.13	2.24	15.29	4.67			2.13	5.85	8.35	1.82	43.5		18.5	5.04	8.8	15.02	6.47	9	1		5	1	5	2			1	3	5	3	12
FALSE	High	Master Protein	A0A088AV41	KOW domain-containing protein OS=Apis mellifera OX=7460 GN=mRpL24 PE=3 SV=1		0	FALSE	23.57	24	6	25	6	253	30.1	9.79	2.33	2.18	0	0	2.55	6.09	5.52	4.83		0	4.85		3.69	0		4.67	6.09	5.63	3.57		1	1	2	1	1	2	2	2		1	2		2	1
FALSE	High	Master Protein	A0A088AEV2	KOW domain-containing protein OS=Apis mellifera OX=7460 GN=RpL26 PE=4 SV=1		0	FALSE	29.036	32	7	115	7	148	17.4	10.86	12.56	9.38	2.09	6.04	12.61	9.27	11.45	8.12	5.51	6.18	6.38	4.86	5.09	10.02	2.04	13.59	13.28	13.96	8.86	9.17	4	4	2	3	5	4	5	4	3	4	2	3	2	3
FALSE	High	Master Protein	A0A088AVX5	L51_S25_CI-B8 domain-containing protein OS=Apis mellifera OX=7460 GN=LOC727049 PE=4 SV=1		0	FALSE	37.676	63	6	104	6	94	11	9.45	11.91	7.16	13.49	5.08	10.89	6.14	16.91	19.79	12.31	11.7	1.63	1.81	10.31	7.71	5.19	10.19	7.6	11.09	8.93	7.8	6	3	5	3	5	2	5	5	6	5	1	2	5	3
FALSE	High	Master Protein	A0A088AGJ0	L51_S25_CI-B8 domain-containing protein OS=Apis mellifera OX=7460 GN=mRpL43 PE=4 SV=1		0	FALSE	21.984	35	5	31	5	191	22.5	8.73	9.06	1.88	0	0	4.82	4.42	4.56	2.19	0		2.33		0	2.84		7.71	5.69	5.08	2.58	0	2	1	1	1	2	1	2	1	1		1		1	1
FALSE	High	Master Protein	A0A087ZV44	L51_S25_CI-B8 domain-containing protein OS=Apis mellifera OX=7460 GN=mRpS25 PE=4 SV=1		0	FALSE	37.917	51	7	24	7	169	19.5	9		0		0		2.39	3.47	3.93	0		0		0	4.6		12.21	5.67	6.19	2.24	2.06		1		1		1	2	2	1		3		1	1
FALSE	High	Master Protein	A0A088A1D9	Lactamase_B domain-containing protein OS=Apis mellifera OX=7460 GN=LOC408355 PE=4 SV=1		0	FALSE	15.7	16	3	3	3	293	33.4	8.73							4.73							3.28													2							1
FALSE	High	Master Protein	A0A088AAM8	Lactamase_B domain-containing protein OS=Apis mellifera OX=7460 GN=LOC410023 PE=4 SV=1		0	FALSE	13.992	17	3	3	3	276	31	7.34	9.04																				3
FALSE	High	Master Protein	A0A087ZZF5	Lactamase_B domain-containing protein OS=Apis mellifera OX=7460 PE=3 SV=1		0	FALSE	17.154	16	4	4	4	298	34.1	7.27													0	3.11		1.83																	1	2
FALSE	High	Master Protein	A0A088ALN9	Lactoylglutathione lyase OS=Apis mellifera OX=7460 PE=3 SV=1		0	FALSE	14.761	21	3	15	3	183	21.1	5.64	7.48			7.16		2.9			2.93	2.34	2.39	1.79		2.15		5.84			3.36		2			2		1			1	1	1	1		1
FALSE	High	Master Protein	A0A088ALQ6	Laminin N-terminal domain-containing protein OS=Apis mellifera OX=7460 PE=4 SV=1		0	FALSE	14.396	18	1	7	1	117	12.9	5.08					7.69	3.99			3.09	6.34										3.36					1	1			1	1
FALSE	High	Master Protein	A0A088A0L8	LEM domain-containing protein OS=Apis mellifera OX=7460 PE=4 SV=1		0	FALSE	64.118	18	11	73	11	788	89.3	8.32	24.88	4.49	0	2.19	23.85	14.94	9.81	2.24	0	5.03	2.04	0		9.9	0	9.79	9.21	11.52	6.53	7.36	8	3	3	2	8	4	4	3	1	5	1	3		2
FALSE	High	Master Protein	A0A087ZUY2	Leucine carboxyl methyltransferase 1 OS=Apis mellifera OX=7460 GN=LOC409320 PE=3 SV=1		0	FALSE	7.25	5	1	2	1	316	36.2	5.57	4.74															2.98					1
FALSE	High	Master Protein	A0A087ZZ69	Ligase_CoA domain-containing protein OS=Apis mellifera OX=7460 PE=4 SV=1		0	FALSE	38.758	63	7	37	4	118	12.6	8.69	27.3		0	6.02		4.21	0	0			2.46	2.2		5.12		10.63	2.11	10.3	7.63	1.9	6		1	3		2	1	1			1	1		1
FALSE	High	Master Protein	A0A088A8B0	LIM domain-containing protein OS=Apis mellifera OX=7460 GN=LOC551547 PE=4 SV=1		0.006	FALSE	3.33	3	1	7	1	342	39.5	7.93					0		0										0	0	0						1		1
FALSE	High	Master Protein	A0A088AAK0	LIM zinc-binding domain-containing protein OS=Apis mellifera OX=7460 PE=4 SV=1		0	FALSE	9.936	3	2	2	2	909	104.2	7.43						4.39					2.05															1					1
FALSE	High	Master Protein	A0A088AQK3	Lipase domain-containing protein OS=Apis mellifera OX=7460 PE=3 SV=1		0	FALSE	9.109	9	2	2	2	359	39.9	6.6			2.91							2.54													1							1
FALSE	High	Master Protein	A0A087ZXA8	Lipase domain-containing protein OS=Apis mellifera OX=7460 PE=3 SV=1		0	FALSE	40.546	35	8	17	8	312	34.6	8.38			24.63																				8
FALSE	High	Master Protein	A0A088AN52	Lipase maturation factor OS=Apis mellifera OX=7460 GN=LOC724741 PE=3 SV=1		0	FALSE	34.253	13	6	39	6	648	75.6	9.26	9.85	6.03	2.17		11.37	9.51	10.3	4.9								15.99	18	18.18	12.34	5.79	2	1	1		2	2	3	3
FALSE	High	Master Protein	A0A087ZSH4	Lipase OS=Apis mellifera OX=7460 PE=3 SV=1		0	FALSE	55.2	22	7	29	7	406	46.5	6.96			45.67					6.97								0				2.08			7					5
FALSE	High	Master Protein	A0A088A4U1	Lipase_3 domain-containing protein OS=Apis mellifera OX=7460 GN=LOC726798 PE=4 SV=1		0	FALSE	8.783	3	1	11	1	669	76.7	9.07	1.98															7.33		4.07	5.44		1
FALSE	High	Master Protein	A0A087ZPP1	Lipocln_cytosolic_FA-bd_dom domain-containing protein OS=Apis mellifera OX=7460 GN=LOC410034 PE=3 SV=1		0.009	FALSE	2.949	5	1	1	1	200	23	6.8																2.42
FALSE	High	Master Protein	A0A088A4R2	Lipocln_cytosolic_FA-bd_dom domain-containing protein OS=Apis mellifera OX=7460 PE=3 SV=1		0	FALSE	16.193	11	2	11	2	296	33.2	7.53		0	2.42	1.82					3.2	4.69	2.74	1.94		7.22								1	1	1					1	1	1	1		1
FALSE	High	Master Protein	A0A087ZZR9	Lipoyl-binding domain-containing protein OS=Apis mellifera OX=7460 GN=LOC409155 PE=4 SV=1		0	FALSE	154.67	33	15	469	15	514	55.6	9.11	91.29	69.03	68.32	58.11	86.35	88.7	84.97	75.89	57.87	46.03	59.76	38.13	65.83	98.62	22.9	73.75	52.69	100.16	75.25	64.81	12	9	9	9	9	10	10	10	8	9	6	7	8	9
FALSE	High	Master Protein	A0A087ZZD5	LisH domain-containing protein OS=Apis mellifera OX=7460 GN=LOC552605 PE=4 SV=1		0.002	FALSE	4.399	1	1	1	1	1112	124.9	5.19	1.76																				1
FALSE	High	Master Protein	A0A088A9S3	L-lactate dehydrogenase OS=Apis mellifera OX=7460 PE=3 SV=1		0	FALSE	37.206	19	8	11	8	463	51.6	9.17											2.69			18.19					5.18												1			7
FALSE	High	Master Protein	A0A088A462	Lon protease homolog, mitochondrial OS=Apis mellifera OX=7460 GN=LOC409459 PE=3 SV=1		0	FALSE	239.69	48	34	276	34	1012	114.7	8.4	86.25	11.09	17.99	7.87	12.84	49.73	48.31	32.4	12.27	7.45	44.57	18.78	36.9	55.9		71.23	41.29	48.86	54.06	11.89	21	5	8	6	5	12	15	11	7	2	12	8	13	13
FALSE	High	Master Protein	A0A088AI22	LRRCT domain-containing protein OS=Apis mellifera OX=7460 PE=4 SV=1		0	FALSE	29.429	13	6	46	6	691	76	5.05	5.15	8.05	0	1.71		8.15	12.29				15.97	11.73		13.55	0	4.43	9.74	2.75	5.11		2	3	1	1		3	3				5	5		3
FALSE	High	Master Protein	A0A088AUQ4	LsmAD domain-containing protein OS=Apis mellifera OX=7460 PE=4 SV=1		0	FALSE	11.096	2	2	3	2	960	106.2	9.32											2.07			5.64																	1			2
FALSE	High	Master Protein	A0A088AEZ9	L-type lectin-like domain-containing protein OS=Apis mellifera OX=7460 GN=Lman2 PE=4 SV=1		0	FALSE	58.15	34	6	22	6	324	37.1	6.73	11.67				4.28		9.81		2.49		3.48		0	14.38	0	5.88	6.45	6.42			3				1		3		1		1		1	4
FALSE	High	Master Protein	A0A088AEI5	L-type lectin-like domain-containing protein OS=Apis mellifera OX=7460 GN=LOC550798 PE=4 SV=1		0	FALSE	97.407	40	13	73	13	504	57.8	6.38	29.76	22.96	0	3.16	1.81	4.13	35.62				0	3.64	3.35	22.21		31	36.33	8.16	4.78	6.44	9	7	1	1	2	1	12				1	3	3	5
FALSE	High	Master Protein	A0A088AHQ9	Lyase_1 domain-containing protein OS=Apis mellifera OX=7460 PE=3 SV=1		0	FALSE	157.881	58	18	271	18	439	47.7	7.77	96.35	46.59	16.15	19.96	12.65	78.72	61.94	22.87	16.82		36.5	18.07	42.56	18.12		94.18	44.2	53.71	51.9	7.48	14	9	7	6	4	16	11	6	5		5	5	7	4
FALSE	High	Master Protein	A0A088ACI9	Lysine--tRNA ligase OS=Apis mellifera OX=7460 GN=Aats-lys PE=3 SV=1		0	FALSE	14.181	5	3	9	3	587	67.6	6.51	5.1					0	0							5.68		2.28	0				2					1	1							2
FALSE	High	Master Protein	A0A088A601	LysM domain-containing protein OS=Apis mellifera OX=7460 PE=4 SV=1		0	FALSE	10.233	3	3	5	3	1255	140.3	5.4				0		3.9				2.83								2.17						2		1				1
FALSE	High	Master Protein	A0A221HHC4	Lytic transglycosylase OS=Serratia marcescens OX=615 GN=BVG84_00985 PE=4 SV=1		0.001	FALSE	4.71	2	1	2	1	473	52	9.88			4.12																				1
FALSE	High	Master Protein	A0A088ADA3	M16C_associated domain-containing protein OS=Apis mellifera OX=7460 GN=PITRM1 PE=4 SV=1		0	FALSE	150.647	43	29	85	29	1033	119.5	6.77	58.86			0		18.39	4.65				7.79	8.49	7.51	5.47		55.33	0		0		16			1		8	4				5	4	7	4
FALSE	High	Master Protein	A0A087ZSU7	M20_dimer domain-containing protein OS=Apis mellifera OX=7460 GN=LOC408969 PE=4 SV=1		0	FALSE	26.263	23	6	30	6	401	45.3	5.44	3.19			6.98	10.31	5.19		7.76		11.14		0	0	1.91		5.38				5.3	1			5	4	2		3		5		1	1	1
FALSE	High	Master Protein	A0A088ADU9	M20_dimer domain-containing protein OS=Apis mellifera OX=7460 GN=LOC412393 PE=4 SV=1		0	FALSE	232.352	65	24	196	24	481	54.2	6.43	154.06	5.14		7.92	15.77	38.55	2.01	6.23	4.45	12.64	24.75	29.53	20.76	72.19		140.78			35.21		20	3		3	5	9	1	2	2	5	7	9	8	13
FALSE	High	Master Protein	A0A088AU96	Macro domain-containing protein OS=Apis mellifera OX=7460 GN=LOC408589 PE=4 SV=1		0	FALSE	43.558	43	7	31	7	270	30.4	8.75	5.69	2.15				0					10.17	3.64	5.11	11.7		12.2			2.68		2	1				1					4	3	3	2
FALSE	High	Master Protein	O18330	Major royal jelly protein 1 OS=Apis mellifera OX=7460 GN=MRJP1 PE=1 SV=1		0	FALSE	11.459	9	3	3	3	432	48.9	5.34																				2.67
FALSE	High	Master Protein	B3GM12	Major royal jelly protein 9 OS=Apis mellifera OX=7460 GN=MRJP9 PE=2 SV=1		0	FALSE	6.938	3	1	2	1	422	48.5	8.53			2.76							2.43													1							1
FALSE	High	Master Protein	A5JN08	Malate dehydrogenase (Fragment) OS=Pectobacterium carotovorum subsp. carotovorum OX=555 GN=mdh PE=3 SV=1		0.005	FALSE	3.809	8	1	1	1	144	15.1	8.81				2																				1
FALSE	High	Master Protein	A0A087ZUK9	Malate dehydrogenase OS=Apis mellifera OX=7460 GN=LOC408950 PE=3 SV=1		0	FALSE	189.173	78	22	588	22	338	35.8	9.29	74.18	108.49	29.96	97.09	59.54	97.5	123.55	71.7	37.76	16.94	120.63	115.86	193.99	72		75.3	47.36	112.18	66.67	48.71	12	18	12	17	13	13	17	15	12	8	10	12	17	11
FALSE	High	Master Protein	A0A087ZYQ1	Malate dehydrogenase OS=Apis mellifera OX=7460 GN=LOC411014 PE=3 SV=1		0	FALSE	100.867	50	13	114	13	333	36.1	6.71	11.87	29.48		39.86	21.46	13.97	41.26	7.84	2.93	21.49	8.71	19.58	12.69	12.07		20	3.2	0	24.94	20.4	4	8		10	5	5	8	3	2	7	3	6	4	3
FALSE	High	Master Protein	A0A087ZPN7	Malectin domain-containing protein OS=Apis mellifera OX=7460 PE=4 SV=1		0	FALSE	7.622	5	1	1	1	287	32.7	5.17														3.79																				1
FALSE	High	Master Protein	A0A088AES7	Malic enzyme OS=Apis mellifera OX=7460 GN=Mdh PE=3 SV=1		0	FALSE	73.762	29	11	29	11	625	69.7	7.64		16.91	0				31.54		0		7.16	0		3.35		3.62	8.43					7	1				9		1		3	1		1
FALSE	High	Master Protein	A0A088ATR6	Malic enzyme OS=Apis mellifera OX=7460 PE=3 SV=1		0	FALSE	82.214	37	15	25	15	632	70.7	7.11	16.92					8.43					2.75		0	3.73		35.65			2.78		5					4					1		1	1
FALSE	High	Master Protein	A0A087ZXG9	MARVEL domain-containing protein OS=Apis mellifera OX=7460 GN=100577682 PE=4 SV=1		0	FALSE	15.792	29	2	5	2	168	19.2	9.17		3.59	2.31	2.11										4.54			2.88					1	1	1										1
FALSE	High	Master Protein	A0A087ZV46	MARVEL domain-containing protein OS=Apis mellifera OX=7460 GN=LOC409019 PE=4 SV=1		0	FALSE	11.675	21	2	22	2	179	20.1	8.56		1.71	1.73	0	1.67	1.81	0	0	0	0				6.39		1.98	1.78	3.65	3.73	0		1	1	1	1	1	1	1	1	1				1
FALSE	High	Master Protein	A0A088ASR9	MARVEL domain-containing protein OS=Apis mellifera OX=7460 GN=LOC726696 PE=4 SV=1		0	FALSE	9.912	20	1	1	1	161	17.8	8.6														4.57																				1
FALSE	High	Master Protein	A0A087ZPM2	Mast cell degranulating peptide OS=Apis mellifera OX=7460 GN=Mcdp PE=4 SV=1		0	FALSE	15.612	20	2	60	2	50	5.8	9.77					9.96	0			3.65	33.93						0			0	0					1	1			1	2
FALSE	High	Master Protein	A0A088A7W0	MATH domain-containing protein OS=Apis mellifera OX=7460 PE=4 SV=1		0.008	FALSE	3.08	1	1	1	1	890	102.7	7.3																		2.11
FALSE	High	Master Protein	A0A088AFE8	Matrin-type domain-containing protein OS=Apis mellifera OX=7460 GN=SF3A3 PE=4 SV=1		0	FALSE	12.645	8	2	7	2	501	58.3	5.41	9.59				0	2.07								2.4		3.13					1				1	1								1
FALSE	High	Master Protein	A0A088A676	Maxi-like antifreeze protein OS=Apis mellifera OX=7460 GN=102654146 PE=2 SV=1		0	FALSE	43.001	41	8	20	8	364	37	6.64	0	0			0	0				0			35.78						0		1	1			1	1				1			7
FALSE	High	Master Protein	A0A088AW52	MCU domain-containing protein OS=Apis mellifera OX=7460 PE=4 SV=1		0	FALSE	30.32	24	6	36	6	339	39.2	7.01	8.77	4.08	4.42	1.67	5.77	3.22	5.69	5.55	2.34	0		1.78	0			9.54	3.34	3.47	6.84	4.82	2	2	2	1	1	1	2	2	1	1		1	1
FALSE	High	Master Protein	P01501	Melittin OS=Apis mellifera OX=7460 GN=MELT PE=1 SV=1		0	FALSE	61.708	23	3	143	3	70	7.6	4.72	3.39	4.18		35.15	87.73	24.33		2.45	21.22	157.58						3.65		3.28	16.39	15.66	1	2		2	3	2		1	2	2
FALSE	High	Master Protein	P0DPR9	Melittin-N OS=Apis cerana OX=7461 GN=MELT PE=1 SV=1		0	FALSE	19.391	21	2	17	2	70	7.6	4.72				0		10.69			16.44				0						9.74					1		2			2				1
FALSE	High	Master Protein	A0A093VDD5	Membrane protein OS=Pectobacterium carotovorum subsp. carotovorum OX=555 GN=KP17_00765 PE=3 SV=1		0	FALSE	22.659	12	5	16	2	366	39	8.53			24.68					2.69			2.7		0	3.21				1.89		2.22			5					1			1		1	1
FALSE	High	Master Protein	A0A088AII8	Methionine aminopeptidase 2 OS=Apis mellifera OX=7460 GN=Metap2 PE=3 SV=1		0	FALSE	6.853	5	2	3	2	474	52.5	5.99							0					2.03		2.54													1					1		1
FALSE	High	Master Protein	A0A088AK91	Methionine aminopeptidase OS=Apis mellifera OX=7460 GN=LOC410385 PE=3 SV=1		0	FALSE	15.425	11	4	5	4	377	42.3	7.2	0													1.91		0			3.12		2													1
FALSE	High	Master Protein	A0A088A0V6	Methylthioribose-1-phosphate isomerase OS=Apis mellifera OX=7460 GN=LOC409023 PE=3 SV=1		0	FALSE	56.329	38	10	32	10	355	39.2	6.55	30.51					6.07		4.49		0				6.58		23.06			5.73		9					2		5		1				2
FALSE	High	Master Protein	A0A087ZPE3	MFS domain-containing protein OS=Apis mellifera OX=7460 GN=102653922 PE=4 SV=1		0	FALSE	23.278	5	2	3	2	568	63.1	7.27												2.8		5.09		1.88																1		1
FALSE	High	Master Protein	A0A087ZX92	MFS domain-containing protein OS=Apis mellifera OX=7460 GN=107965219 PE=4 SV=1		0	FALSE	64.371	7	3	33	3	480	54.1	7.05	23.22		6.16		10.23	4.04		7.96		2.05	7.29			27.06	2.73	3.68		20.84		3.81	3		1		3	1		2		1	1			2
FALSE	High	Master Protein	A0A087ZS22	MFS domain-containing protein OS=Apis mellifera OX=7460 GN=LOC408478 PE=3 SV=1		0	FALSE	7.886	4	2	2	2	545	60.7	9.22													1.73	2.37																			1	1
FALSE	High	Master Protein	A0A087ZS87	MFS domain-containing protein OS=Apis mellifera OX=7460 GN=LOC410566 PE=4 SV=1		0	FALSE	23.241	15	5	45	5	498	55.7	7.83	18.69				4.8	3.07		7.2	10.34					3.35	0	3.1		12.56	1.76	3.96	4				2	1		3	3					4
FALSE	High	Master Protein	A0A088AUD6	MFS domain-containing protein OS=Apis mellifera OX=7460 GN=LOC410705 PE=4 SV=1		0.006	FALSE	3.191	2	1	1	1	534	59.8	6.54																		0
FALSE	High	Master Protein	A0A088A6U6	MFS domain-containing protein OS=Apis mellifera OX=7460 GN=LOC410920 PE=4 SV=1		0	FALSE	17.858	7	4	16	4	508	56.2	8.21		3.71	7.5			2.64		8.1			3.8			1.82	0		2.75	2.24	2.7			1	3			1		3			2			1
FALSE	High	Master Protein	A0A088A3V4	MFS domain-containing protein OS=Apis mellifera OX=7460 GN=LOC412056 PE=4 SV=1		0.009	FALSE	3.01	1	1	7	1	543	60.6	8.44	1.61				0			0	0							1.78		1.9			1				1			1	1
FALSE	High	Master Protein	A0A088AMR8	MFS domain-containing protein OS=Apis mellifera OX=7460 GN=LOC412540 PE=4 SV=1		0	FALSE	28.205	14	5	8	5	596	67.4	6.54					2.28			5.49						5.78	2.6			5.36		0					1			2						1
FALSE	High	Master Protein	A0A088ABY6	MFS domain-containing protein OS=Apis mellifera OX=7460 GN=LOC413575 PE=3 SV=1		0	FALSE	18.08	11	3	5	3	538	58.4	6.55			7								2.01		3.14										2								1		1
FALSE	High	Master Protein	A0A087ZQS9	MFS domain-containing protein OS=Apis mellifera OX=7460 GN=LOC413739 PE=4 SV=1		0	FALSE	57.324	17	7	26	7	546	60.6	7.68	15.75				6.91	0		5.32						3.26		3.1		22.7	2.28	2.19	4				2	1		3						1
FALSE	High	Master Protein	A0A088A2U8	MFS domain-containing protein OS=Apis mellifera OX=7460 GN=LOC551936 PE=3 SV=1		0	FALSE	8.425	6	1	1	1	474	52.8	7.21														5.58																				1
FALSE	High	Master Protein	A0A088AM86	MFS domain-containing protein OS=Apis mellifera OX=7460 GN=LOC552592 PE=3 SV=1		0	FALSE	9.057	5	2	2	2	514	56.3	9.14			2.53					0															1					1
FALSE	High	Master Protein	A0A088A8N0	MFS domain-containing protein OS=Apis mellifera OX=7460 GN=LOC724874 PE=3 SV=1		0	FALSE	179.802	50	19	148	19	514	57.9	8.72	23.45		85.9	1.83	3.66	15.31		23.56	19.54	0	3.69		35.82	54.91	0	32.66		19.93	20.83	1.96	5		11	1	1	4		4	5	1	1		7	7
FALSE	High	Master Protein	A0A088A193	MFS domain-containing protein OS=Apis mellifera OX=7460 GN=LOC725462 PE=4 SV=1		0.005	FALSE	3.802	2	1	2	1	524	58.9	9.07							0										1.94										1
FALSE	High	Master Protein	A0A087ZWI3	MFS domain-containing protein OS=Apis mellifera OX=7460 GN=Picot PE=4 SV=1		0	FALSE	20.397	10	5	11	5	525	58	7.28	2.9		4.83						2.68			0		7.13	0			1.89			1		3						1			1		2
FALSE	High	Master Protein	A0A087ZQD7	MFS domain-containing protein OS=Apis mellifera OX=7460 PE=3 SV=1		0	FALSE	21.241	8	4	37	4	784	87.1	7.34	14.29	0			2.47	4.43		0	2.3					4.08	0	18	2.73	22.52	2.63	4.86	1	1			1	1		1	1					1
FALSE	High	Master Protein	A0A087ZPL0	MFS domain-containing protein OS=Apis mellifera OX=7460 PE=3 SV=1		0	FALSE	21.138	8	4	13	4	490	54.6	6.25			4.53					2.17		0	2.17			6.17				9.35		0			2					1		1	1			2
FALSE	High	Master Protein	A0A087ZYT1	MFS domain-containing protein OS=Apis mellifera OX=7460 PE=3 SV=1		0	FALSE	18.653	7	3	52	3	460	50.9	7.88	5		7.95	0	8.58	3.6		9.07	3.21	0	0			1.3	0	3.92		10.02	3.98	0	3		3	2	3	3		3	2	2	1			1
FALSE	High	Master Protein	A0A087ZVC0	MFS domain-containing protein OS=Apis mellifera OX=7460 PE=4 SV=1		0.004	FALSE	3.969	2	1	2	1	493	53.4	8.87			2.22																	1.84			1
FALSE	High	Master Protein	A0A087ZQT0	MFS domain-containing protein OS=Apis mellifera OX=7460 PE=4 SV=1		0	FALSE	34.65	13	3	86	3	355	39.8	5.34	26.89		25.81	11.19	13.49	16.69		33.79	10.34	11.03	4.69	0		19.92	7.75	8.92		29.29	14.33	22	3		3	2	2	2		3	2	2	1	1		2
FALSE	High	Master Protein	A0A087ZPK9	MFS domain-containing protein OS=Apis mellifera OX=7460 PE=4 SV=1		0	FALSE	9.443	8	1	7	1	143	16.3	5.5								3.72						10.79				10.14										1						1
FALSE	High	Master Protein	A0A087ZPG6	MFS domain-containing protein OS=Apis mellifera OX=7460 PE=4 SV=1		0	FALSE	33.582	14	4	21	4	334	37.8	9.35			0			2.79		18.24	0					7.75				21.36	4.22	0			1			1		4	1					1
FALSE	High	Master Protein	A0A088A3S5	MFS domain-containing protein OS=Apis mellifera OX=7460 PE=4 SV=1		0.005	FALSE	3.517	2	1	1	1	538	60.8	7.99								2.09																				1
FALSE	High	Master Protein	A0A087ZUB5	MFS domain-containing protein OS=Apis mellifera OX=7460 PE=4 SV=1		0.003	FALSE	4.003	2	1	1	1	543	59.8	7.72														1.63																				1
FALSE	High	Master Protein	A0A088A5U8	MFS domain-containing protein OS=Apis mellifera OX=7460 PE=4 SV=1		0	FALSE	33.93	14	7	18	7	798	86.5	5.78	4.23				3.24		0				5.06	0		2.31		2.96	2.58	5.56	3.06		1				1		1				4	1		1
FALSE	High	Master Protein	A0A088A4M6	MFS_1_like domain-containing protein OS=Apis mellifera OX=7460 GN=LOC410041 PE=4 SV=1		0	FALSE	8.134	4	2	4	2	710	79.3	6.83											2.19						2.68	2.36	3.06												1
FALSE	High	Master Protein	A0A088A0U4	MGS domain-containing protein OS=Apis mellifera OX=7460 GN=LOC412467 PE=3 SV=1		0	FALSE	26.864	12	5	10	5	593	65.7	8.19	4.42					3.08					2		1.65	5.14		9.32			4.45		1					1					1		1	2
FALSE	High	Master Protein	A0A088A9E6	MHD domain-containing protein OS=Apis mellifera OX=7460 GN=AP-50 PE=3 SV=1		0	FALSE	14.955	13	4	9	4	442	49.9	9.45	7.83	3.67		1.85			1.65						1.61			2.67					3	2		1			1						1
FALSE	High	Master Protein	A0A087ZV20	MHD domain-containing protein OS=Apis mellifera OX=7460 GN=LOC408391 PE=3 SV=1		0	FALSE	6.383	3	1	2	1	422	48.5	7.18	3.32															3.57					1
FALSE	High	Master Protein	A0A088AG05	MICOS complex subunit MIC13 OS=Apis mellifera OX=7460 GN=725253 PE=3 SV=1		0	FALSE	35.585	61	4	80	4	114	12.9	9.28	17.18	8.18	10.78	5	22.4	16.5	12.5	19.41	8.24	5.35					1.74	11.18	4.09	20.96	9.71	6.26	3	3	3	3	3	2	3	3	4	2
FALSE	High	Master Protein	A0A088ASI2	MICOS complex subunit MIC60 OS=Apis mellifera OX=7460 GN=LOC408548 PE=3 SV=1		0	FALSE	333.319	60	38	615	38	752	86.1	7.78	96.54	64.2	80.46	15.82	94.25	71.05	104.64	114.35	69.13	37.27	64.32	26.78	111.48	83.24	23.24	81.76	129.12	127.48	67.77	72.56	20	21	24	8	20	20	24	27	19	12	15	11	22	13
FALSE	High	Master Protein	A0A088A8C1	MICOS complex subunit OS=Apis mellifera OX=7460 GN=LOC552009 PE=4 SV=1		0	FALSE	115.701	64	13	291	13	245	27.5	8.38	28.74	50.76	62.84	29.05	61.94	36.47	65.99	65.51	38.8	28.1	17.42	12.01	21.59	23.83	18.81	33.85	68.45	51.02	34.98	45.61	6	6	9	5	9	7	10	9	7	8	5	4	6	4
FALSE	High	Master Protein	A0A088A4V0	Mitochondrial fission 1 protein OS=Apis mellifera OX=7460 GN=LOC551255 PE=3 SV=1		0	FALSE	25.715	51	6	32	6	150	17.1	7.84	4.25	2.93	4.93	7.9	2.83	4.21	7.96	0	3.13				0			5.96	10.83	2.23	4.6	2.38	1	2	3	3	1	2	3	1	2				1
FALSE	High	Master Protein	A0A088A218	Mitochondrial import inner membrane translocase subunit TIM44 OS=Apis mellifera OX=7460 GN=LOC412409 PE=3 SV=1		0	FALSE	75.631	42	16	102	16	456	52.2	8.44	28.16	5.25	14.23	4.4	11.73	14.2	10.06	12.98	12.99	0	6.7	2.29	0	21.79		27.18	6.15	20.72	14.04	10.57	8	3	6	4	3	4	4	6	4	1	2	2	2	6
FALSE	High	Master Protein	A0A088AJ70	Mitochondrial import inner membrane translocase subunit TIM50 OS=Apis mellifera OX=7460 GN=LOC408569 PE=3 SV=1		0	FALSE	51.518	37	10	74	10	387	45.5	6.81	9.05	6.02	9.04	4.2	12.89	4.66	5.56	13.54	4	1.9	6.77	4.48	4.63	14.4	0	8.53	8.2	15.34	11.36	8.05	4	2	2	2	4	2	3	6	1	1	3	3	4	4
FALSE	High	Master Protein	A0A3S8NTU5	Mitochondrial iron-sulfur cluster assembly 1-like protein OS=Apis mellifera ligustica OX=7469 GN=magr PE=2 SV=1		0.002	FALSE	4.146	12	1	1	1	130	14.1	8.88														2.6																				1
FALSE	High	Master Protein	A0A088AN56	Mitochondrial pyruvate carrier OS=Apis mellifera OX=7460 GN=LOC411677 PE=3 SV=1		0	FALSE	14.807	47	2	8	2	103	12.1	9.8			6.45		6.82			4.12								3.01	0			0			1		2			1
FALSE	High	Master Protein	A0A088A1R9	Mitochondrial Rho GTPase OS=Apis mellifera OX=7460 PE=3 SV=1		0	FALSE	8.117	4	2	2	2	650	74.3	6.68													1.64				2.74																1
FALSE	High	Master Protein	A0A088AJ01	Mitogen-activated protein kinase OS=Apis mellifera OX=7460 GN=rl PE=4 SV=1		0.005	FALSE	3.645	4	1	2	1	365	42	6.34									1.63							3.06													1
FALSE	High	Master Protein	A0A087ZVK5	ML domain-containing protein OS=Apis mellifera OX=7460 GN=LOC551922 PE=4 SV=1		0	FALSE	6.713	20	2	3	2	152	17	6.73				0			2.2																	2			1
FALSE	High	Master Protein	A0A087ZTA5	ML domain-containing protein OS=Apis mellifera OX=7460 GN=LOC724386 PE=4 SV=1		0	FALSE	10.874	16	2	51	2	148	16.1	7.62	0		2.12	7.06				3.93	8.65	0	2.21	0	39.78			4.6	4.79			2.45	1		1	2				2	2	2	1	1	2
FALSE	High	Master Protein	A0A088A045	ML domain-containing protein OS=Apis mellifera OX=7460 PE=4 SV=1		0	FALSE	18.173	47	4	8	4	154	16.8	6.51				4.64			0				0	3.13	1.82											2			1				1	2	1
FALSE	High	Master Protein	A0A088AIM1	MoCF_biosynth domain-containing protein OS=Apis mellifera OX=7460 PE=4 SV=1		0	FALSE	47.486	31	9	16	9	467	53.2	6.65	17.4				1.81	2.02								8.16		15					7				1	1								2
FALSE	High	Master Protein	A0A088ASG4	Molybdopterin molybdenumtransferase OS=Apis mellifera OX=7460 PE=3 SV=1		0	FALSE	41.841	26	9	24	9	510	55.8	8.28	6.37	3.13		2.5		2.95		0						14.07		3.43		10.08	3.51	0	3	2		2		2		1						3
FALSE	High	Master Protein	A0A087ZUN0	MOSC domain-containing protein OS=Apis mellifera OX=7460 GN=100577026 PE=4 SV=1		0	FALSE	54.22	25	10	54	10	415	47.6	5.88	13.47	7.23	5.79	0	0	8.89	20.84	9.15					4.47	2.77	0		18.33	7.1	4.7		4	3	3	1	1	3	5	4					2	1
FALSE	High	Master Protein	A0A088AV56	MOSC domain-containing protein OS=Apis mellifera OX=7460 GN=LOC724919 PE=4 SV=1		0	FALSE	123.043	57	14	358	14	343	38.8	9.19	84.44	10.48	50.62	18.73	73.42	56.5	27.09	93.53	48.52	25.34	16.09	8.81	2.35	76.49	23.22	73.21	32.38	98.71	56.78	46.28	12	4	10	7	9	12	10	14	11	8	5	3	1	8
FALSE	High	Master Protein	A0A088AGS6	MPN domain-containing protein OS=Apis mellifera OX=7460 GN=LOC408413 PE=4 SV=1		0	FALSE	105.786	47	9	72	9	320	36.4	6.48	44.92	3.97	0	10.58	4.21	13.3	13.57	3.67	3.94	3.53	4.26	3.61	2.05	42.71		32.41	7.26	9.01	21.7	13.31	9	1	1	4	1	2	3	1	2	1	1	2	2	4
FALSE	High	Master Protein	A0A088AHW7	MPN domain-containing protein OS=Apis mellifera OX=7460 GN=LOC410195 PE=4 SV=1		0	FALSE	5.438	4	1	1	1	338	38	5.67														1.62																				1
FALSE	High	Master Protein	A0A088A3I1	MPN domain-containing protein OS=Apis mellifera OX=7460 GN=LOC551620 PE=4 SV=1		0	FALSE	44.101	6	9	20	9	2374	277	8.88	19.31					2.08	2.08							5.02		13.37	2.38		2.28		6					1	2							2
FALSE	High	Master Protein	A0A088ATF1	MPN domain-containing protein OS=Apis mellifera OX=7460 GN=LOC552372 PE=4 SV=1		0	FALSE	19.095	32	5	9	5	207	23.5	6.15	2.83	2.27					4.97		0					0		2.48	1.98	0			1	1					2		1					1
FALSE	High	Master Protein	A0A087ZR05	MPN domain-containing protein OS=Apis mellifera OX=7460 GN=Rpn11 PE=4 SV=1		0	FALSE	54.43	53	9	46	9	311	34.6	6.29	20.13			4.76		14.54	13.04	2.21				0		14.61		23.92	6.43	6.34	11.52	5.69	6			3		4	4	2				1		4
FALSE	High	Master Protein	A0A088ABL8	MPN domain-containing protein OS=Apis mellifera OX=7460 PE=4 SV=1		0	FALSE	10.829	10	3	6	3	467	53.6	7.23	6.78															4.58					2
FALSE	High	Master Protein	A0A088AP94	MR_MLE domain-containing protein OS=Apis mellifera OX=7460 GN=LOC411307 PE=4 SV=1		0	FALSE	37.636	17	6	38	6	446	50.8	6.55	15.87			0	13.78	8.52		5.6	4.06	2.22						8.68		2.61	2.12	6.81	2			1	3	1		2	2	1
FALSE	High	Master Protein	A0A088A8N1	MRP-S23 domain-containing protein OS=Apis mellifera OX=7460 PE=4 SV=1		0	FALSE	32.099	44	5	20	5	144	17.2	9.22	7.85	5.28	0	2.69	5.74	6.75	3.48				2.37	1.86	0	1.94		8.17	7.37	4.14			1	2	1	1	2	2	1				1	1	1	1
FALSE	High	Master Protein	A0A088A3M3	MRP-S28 domain-containing protein OS=Apis mellifera OX=7460 GN=mRpS35 PE=4 SV=1		0	FALSE	29.315	23	6	31	6	323	37.8	9.32	7.35	0		0		9.52	3.21	2.94	0		0	2.24	0	2.26	0	8.15	10.73	7.84	2.99	0	2	1		1		2	1	1	1		2	1	1	1
FALSE	High	Master Protein	A0A087ZQD5	MSP domain-containing protein OS=Apis mellifera OX=7460 GN=Vapa PE=4 SV=1		0	FALSE	99.328	49	12	256	12	249	28.1	7.84	48.69	29.39	4.24	6.46	28.29	23.72	44.9	6.92	0	9.85	33.74	22.7	10.92	62.93	4.5	35.15	36.39	44.3	38.21	20.28	9	7	3	4	6	6	8	4	1	2	9	7	4	9
FALSE	High	Master Protein	A0A088A1I8	Multifunctional fusion protein OS=Apis mellifera OX=7460 GN=LOC551113 PE=3 SV=1		0	FALSE	190.599	60	27	381	27	567	63.5	8.32	47.31	60.88	7.76	13.78	0	65.39	57.78	14.07	9.62		83.48	50.11	63.51	50.35		81.13	69.2	22.65	49.02	4.61	12	14	3	5	1	20	19	5	5		10	15	16	8
FALSE	High	Master Protein	A0A093RDD7	Murein lipoprotein OS=Pectobacterium carotovorum subsp. carotovorum OX=555 GN=KP17_02980 PE=4 SV=1		0	FALSE	14.476	33	2	20	1	78	8.4	9.31	3.53		8.81	7.45	3.66	3.56	3.11		2.62	3.62			12.04		0	6.52				5.62	1		1	1	1	1	1		1	1			2
FALSE	High	Master Protein	A0A080UXV1	Murein-lipoprotein OS=Serratia marcescens OX=615 GN=lpp PE=4 SV=1		0	FALSE	14.054	33	2	27	1	78	8.3	8.84	3.53		8.81	13.76	3.66	7.14	3.11		2.62	3.62			11.13		0	9.57				12.45	1		1	2	1	2	1		1	1			2
FALSE	High	Master Protein	A0A088AJT3	Myb_DNA-bind_5 domain-containing protein OS=Apis mellifera OX=7460 PE=4 SV=1		0	FALSE	35.999	8	2	20	2	439	50.8	8.29	16.16						11.57	3.06		2.26	2.39	4.99		16.3		2.43		10.25			2						2	1		1	1	1		2
FALSE	High	Master Protein	A0A088AGS8	Myosin motor domain-containing protein OS=Apis mellifera OX=7460 PE=3 SV=1		0.002	FALSE	4.448	1	1	2	1	1582	183.1	8.69																	2.04			0
FALSE	High	Master Protein	A0A088AJE3	Myosin motor domain-containing protein OS=Apis mellifera OX=7460 PE=3 SV=1		0	FALSE	2730.67	64	177	13412	177	1967	226.4	5.55	2023.53	1736.8	1442.91	723.56	2049.22	2125.84	1547.92	977.3	1695.17	1117.09	6550.12	4177.59	691.26	3896.29	962.73	1399.51	1677.15	2360.9	2080.18	1360.55	137	133	136	107	141	143	126	119	137	126	132	131	79	136
FALSE	High	Master Protein	A0A087ZW20	Myosin_tail_1 domain-containing protein OS=Apis mellifera OX=7460 PE=4 SV=1		0	FALSE	444.404	45	33	1397	33	639	74.5	7.23	213.41	205.42	102.02	161.87	215.33	233.37	134.93	85.26	177.55	135.35	1041.11	517.34	58.94	363.42	132.75	202.33	67.46	211.22	251.13	143.33	20	21	17	18	20	23	18	17	22	22	25	26	13	23
FALSE	High	Master Protein	A0A087ZW19	Myosin_tail_1 domain-containing protein OS=Apis mellifera OX=7460 PE=4 SV=1		0	FALSE	629.299	64	47	1941	46	541	63.5	5.36	358.3	291.84	186.2	196.5	356.67	410.13	242.01	121.35	238.31	200.39	765.12	527.16	72.54	528.11	138.72	296.89	131	345.92	380.43	209.72	35	33	29	29	35	42	32	24	30	33	34	35	19	32
FALSE	High	Master Protein	A0A088ABQ1	Myosin-VI_CBD domain-containing protein OS=Apis mellifera OX=7460 PE=4 SV=1		0	FALSE	6.01	6	1	14	1	201	23.6	9.28	2.95				0	0	0									2.24		0	0	0	1				1	1	1
FALSE	High	Master Protein	A0A088ATG2	Na_H_Exchanger domain-containing protein OS=Apis mellifera OX=7460 PE=4 SV=1		0	FALSE	175.507	40	18	376	18	496	53.8	7.09	62.49	78.38	48.21	36.63	19.59	57.1	94.23	20.57	7.45	21.89	101.6	40.98	3.43	88.72	14.62	22.78	105.29	33.25	62.83	29.78	8	12	10	8	4	11	13	6	2	4	11	9	2	10
FALSE	High	Master Protein	A0A088AUC4	NAC-A/B domain-containing protein OS=Apis mellifera OX=7460 GN=LOC551157 PE=4 SV=1		0	FALSE	44.72	38	6	32	6	214	22.7	4.81	12.84	4.69		1.93	0	1.94	16.45		0	0	2.23	5.37	0	13.27		3.69	2.57	1.89			5	2		1	1	1	5		1	1	1	2	1	3
FALSE	High	Master Protein	A0A0B4J2M4	N-acetylglucosamine-6-phosphate deacetylase OS=Apis mellifera OX=7460 PE=3 SV=1		0	FALSE	7.536	4	1	3	1	405	44.5	7.69	2.93					2.24	2.17														1					1	1
FALSE	High	Master Protein	A0A088AAB4	N-acetyltransferase domain-containing protein OS=Apis mellifera OX=7460 GN=LOC724486 PE=4 SV=1		0	FALSE	10.115	15	2	3	2	168	19.5	8.5	3.66					2.82								3.41							1					1								1
FALSE	High	Master Protein	A0A087ZSX5	N-acetyltransferase domain-containing protein OS=Apis mellifera OX=7460 PE=4 SV=1		0	FALSE	30.44	29	7	9	7	313	35.7	6.58	2.63													2.74		19.72					1													1
FALSE	High	Master Protein	A0A088AHR1	N-acetyltransferase domain-containing protein OS=Apis mellifera OX=7460 PE=4 SV=1		0	FALSE	6.136	10	2	2	2	262	29.8	5.76													2.16																				2
FALSE	High	Master Protein	A0A088AFP4	NACHT domain-containing protein OS=Apis mellifera OX=7460 PE=4 SV=1		0.002	FALSE	4.335	1	1	1	1	1581	171.1	7.91	2.45																				1
FALSE	High	Master Protein	A0A0U6GD80	NAD(P) transhydrogenase subunit beta OS=Serratia marcescens OX=615 GN=pntB PE=3 SV=1		0.002	FALSE	4.433	3	1	1	1	464	49	5.66																			3.37
FALSE	High	Master Protein	A0A088A0I0	NAD(P)-bd_dom domain-containing protein OS=Apis mellifera OX=7460 GN=LOC412445 PE=4 SV=1		0	FALSE	63.773	51	8	91	8	201	22.2	8.25	48.92	3.93	3.52	11.92	10.33	19.93	14.6	9.25	12.8	9.59	5.47		2.51	44.55		38.24	12.51	12.89	29.87	15.68	5	1	1	3	2	3	3	3	3	2	3		3	5
FALSE	High	Master Protein	A0A088A9V8	NAD(P)-bd_dom domain-containing protein OS=Apis mellifera OX=7460 PE=3 SV=1		0	FALSE	26.148	25	7	10	7	356	40.3	6.86	4.03	0		0										9.49		2.88			2.91		1	1		1										4
FALSE	High	Master Protein	A0A087ZRH1	NAD_Gly3P_dh_N domain-containing protein OS=Apis mellifera OX=7460 PE=4 SV=1		0.004	FALSE	3.98	17	1	1	1	78	8.8	9.16													2.55																				1
FALSE	High	Master Protein	A0A087ZP22	NADH dehydrogenase [ubiquinone] 1 alpha subcomplex subunit 10, mitochondrial OS=Apis mellifera OX=7460 GN=Ndufa10 PE=3 SV=1		0	FALSE	187.866	74	28	285	28	415	49.2	7.11	41.53	19.81	46.19	19.3	27.79	23.69	38.82	69.84	25.11	17.52	24.97	12.46	41.86	35.68	7.8	26.08	16.76	27.63	25.61	32.28	14	9	13	9	10	12	14	20	10	7	9	4	13	8
FALSE	High	Master Protein	A0A087ZQU2	NADH dehydrogenase [ubiquinone] 1 alpha subcomplex subunit 8 OS=Apis mellifera OX=7460 GN=Ndufa8 PE=3 SV=1		0	FALSE	54.511	56	9	99	9	174	20.2	8.05	9.43	4.92	10.84	2.57	6.45	2.95	18.46	21.01	9.32	5.45	7.8	4.33	8.84	10.97	0	5.67	18.4	23.89	7.14	8.01	4	3	5	3	3	1	7	6	4	3	3	1	5	3
FALSE	High	Master Protein	A0A088A1P8	NADH dehydrogenase [ubiquinone] flavoprotein 1, mitochondrial OS=Apis mellifera OX=7460 PE=3 SV=1		0	FALSE	175.251	69	22	401	22	469	51.5	8.34	88.9	57.61	64.76	21.89	69.14	52.67	58.8	80.19	56.23	32.9	16.78	15.52	76.85	25.73	0	55.56	60.08	79.9	38.77	36.98	16	13	16	8	14	10	14	19	14	7	2	3	10	4
FALSE	High	Master Protein	A0A0S2LSJ1	NADH dehydrogenase subunit 6 OS=Apis mellifera OX=7460 GN=ND6 PE=4 SV=1		0.005	FALSE	3.868	6	1	3	1	167	20	9.73		2.46															2.55			2.69		1
FALSE	High	Master Protein	A0A088AB11	NADH-cytochrome b5 reductase OS=Apis mellifera OX=7460 GN=LOC413189 PE=3 SV=1		0	FALSE	156.773	50	16	368	16	308	34.6	8.9	77.27	32.86	33.16	19.42	41.03	57.04	67.51	42.25	36.73	29.27	31.63	18.72	25.3	67.92	3.8	69.26	68.79	75.92	51.94	34.45	13	9	9	7	8	11	11	10	10	9	5	7	10	9
FALSE	High	Master Protein	A0A060B9T4	NADH-ubiquinone oxidoreductase chain 1 OS=Apis mellifera scutellata OX=212527 GN=ND1 PE=3 SV=1		0	FALSE	10.876	5	1	13	1	305	36.7	6.54	5.9	4.79	2.59		5.55			0								2.05		0	2.06		1	1	1		1			1
FALSE	High	Master Protein	A0A0B5HAU7	NADH-ubiquinone oxidoreductase chain 3 OS=Apis mellifera syriaca OX=279977 GN=ND3 PE=3 SV=1		0	FALSE	11.498	11	1	46	1	117	14	8.1	8.38	7.1	7.89	0	3.42	4.89	9.4	9.54	7.69	2.79			4.66	2.59	0	5.18	7.94	9.15	5.82	4.93	1	1	1	1	1	1	1	1	1	1			1	1
FALSE	High	Master Protein	A0A088AJJ2	NADPH--cytochrome P450 reductase OS=Apis mellifera OX=7460 PE=4 SV=1		0	FALSE	176.249	50	21	298	21	523	60.3	7.05	92.42	36.43	13.68	9.12	82.11	31.16	54.84	26.62		9.89	7.22	11.79	1.76	106.58	2.45	96.55	49.68	32.69	21.69	16.53	17	11	6	5	19	8	15	9		3	3	5	1	13
FALSE	High	Master Protein	V5T6Q6	NADPH-dependent FMN reductase OS=Lactobacillus kimbladii OX=1218506 GN=JF75_02910 PE=4 SV=1		0	FALSE	16.186	20	3	5	3	182	20	5.15			3.97					4.86															2					2
FALSE	High	Master Protein	A0A088AD09	Ncstrn_small domain-containing protein OS=Apis mellifera OX=7460 GN=nct PE=4 SV=1		0	FALSE	5.116	3	1	2	1	642	72.1	6.04					0													2.61							1
FALSE	High	Master Protein	A0A087ZNN2	Neutral ceramidase OS=Apis mellifera OX=7460 PE=3 SV=1		0	FALSE	57.827	45	10	17	10	359	40.2	5.9			31.6					3.87															10					2
FALSE	High	Master Protein	A0A087ZNN1	Neutral ceramidase OS=Apis mellifera OX=7460 PE=3 SV=1		0	FALSE	40.416	24	6	11	6	349	38.6	7.58			31.47																				6
FALSE	High	Master Protein	A0A088AD98	NFACT-R_1 domain-containing protein OS=Apis mellifera OX=7460 GN=LOC551148 PE=4 SV=1		0.001	FALSE	4.706	11	1	2	1	209	24.6	6.18	3.92					0															1					1
FALSE	High	Master Protein	A0A088A2E5	Nfu_N domain-containing protein OS=Apis mellifera OX=7460 GN=LOC412366 PE=4 SV=1		0	FALSE	7.171	11	2	3	2	275	31.2	5.44	4.9															2.17					2
FALSE	High	Master Protein	A0A087ZYD4	Nicalin OS=Apis mellifera OX=7460 GN=Ncln PE=3 SV=1		0	FALSE	23.247	14	5	18	5	555	62	6.65	6.47	0	0		2.74		4.35	2.18		1.73				6.83		5.7	2.51	2.63		2.33	2	1	2		1		1	1		1				2
FALSE	High	Master Protein	A0A088ANS0	Nicotinamide-nucleotide adenylyltransferase OS=Apis mellifera OX=7460 PE=3 SV=1		0	FALSE	16.466	16	4	8	4	348	38.8	6.19	4.39					2.52								1.75		6.58		2.56	2.9		2					1								1
FALSE	High	Master Protein	A0A087ZZA0	Nipped-B protein OS=Apis mellifera OX=7460 PE=3 SV=1		0	FALSE	5.683	1	1	3	1	2007	227.6	6.96	2					0										2.29					1					1
FALSE	High	Master Protein	G5D4Y5	Nischarin-like protein (Fragment) OS=Apis mellifera OX=7460 PE=4 SV=1		0	FALSE	12.441	14	2	2	2	291	33.1	6.13														3.22		0																		1
FALSE	High	Master Protein	A0A087ZWA0	Non-specific serine/threonine protein kinase OS=Apis mellifera OX=7460 GN=Akt1 PE=4 SV=1		0	FALSE	12.466	8	2	2	2	544	60.8	6.55														3.2		2.67																		1
FALSE	High	Master Protein	A0A088ABF9	Non-specific serine/threonine protein kinase OS=Apis mellifera OX=7460 GN=Pak PE=4 SV=1		0	FALSE	13.423	6	2	3	2	586	64.6	7.01	7.61															0					2
FALSE	High	Master Protein	A0A087ZXD9	Non-specific serine/threonine protein kinase OS=Apis mellifera OX=7460 GN=SNF1A PE=4 SV=1		0	FALSE	39.9	21	7	20	7	515	58.5	8.4		2.57		7.53		5.43	3.48	0		0	0			7.19		2.86	3.05	6.92		3.11		2		3		2	2	1		1	1			1
FALSE	High	Master Protein	A0A087ZZZ5	Nop domain-containing protein OS=Apis mellifera OX=7460 GN=LOC413935 PE=4 SV=1		0	FALSE	57.818	19	8	61	8	578	65.2	8.13	14.45	4.14			9.36	10.41	8.62	11.32		0	2.35			11.44		14.37	10.12	6.84	1.94	4.2	3	2			3	3	3	4		1	1			4
FALSE	High	Master Protein	A0A088AQN0	Nop domain-containing protein OS=Apis mellifera OX=7460 PE=4 SV=1		0	FALSE	58.778	33	10	54	10	468	52.1	9.36	17.21	2.08			6.52	8.78	8.3	15.65		0				6.4	0	11.67	7.72	16.5	4.8	0	5	3			4	3	3	6		1				1
FALSE	High	Master Protein	A0A088A0Q7	Nsp1_C domain-containing protein OS=Apis mellifera OX=7460 PE=4 SV=1		0.002	FALSE	4.466	2	1	1	1	464	48.8	4.87														2.56																				1
FALSE	High	Master Protein	A0A088ACJ3	NTF2 domain-containing protein OS=Apis mellifera OX=7460 GN=LOC409406 PE=4 SV=1		0	FALSE	18.761	17	1	25	1	130	14.9	5.78	4.32	5.82		8.48	6.46	4.03	2.73	2.46	9.41	2.37						11.04	6.92	3.95	12.71		1	1		1	1	1	1	1	1	1
FALSE	High	Master Protein	A0A087ZXL9	NTP_transferase domain-containing protein OS=Apis mellifera OX=7460 GN=LOC413435 PE=4 SV=1		0	FALSE	31.197	20	7	32	7	420	46.3	8.22	4.19	0	0	11.96	3.96		0	1.93	7.28			2.1		4.44		5.56	0	1.7	3.43	0	1	1	1	6	2		1	1	2			1		1
FALSE	High	Master Protein	A0A088A202	NTP_transferase domain-containing protein OS=Apis mellifera OX=7460 PE=4 SV=1		0	FALSE	29.403	22	6	14	6	359	39.8	6.2	7.94			2.35			0				0			7.91		7.69			5.73		3			2			1				1			2
FALSE	High	Master Protein	A0A088A1B8	Nuclear pore protein OS=Apis mellifera OX=7460 GN=LOC410343 PE=3 SV=1		0	FALSE	49.018	20	10	19	10	824	93.8	6.1	6.6				4.44	2.91	0			0		0		3.15		5.34	2.98	5.91		3.04	2				2	1	1			2		1		2
FALSE	High	Master Protein	A0A088AV91	Nucleolar protein 6 OS=Apis mellifera OX=7460 PE=3 SV=1		0.002	FALSE	4.516	1	1	1	1	1161	135.8	9.03																		2.51
FALSE	High	Master Protein	A0A088A7S0	Nucleoplasmin domain-containing protein OS=Apis mellifera OX=7460 GN=102655896 PE=4 SV=1		0	FALSE	5.368	6	1	13	1	171	18.8	4.75		4.23			2.8		5.23	2.39	2.19	2.61	2.39	2.84	2.42	5.7								1			1		1	1	1	1	1	1	1	1
FALSE	High	Master Protein	A0A088ATV8	Nucleoside diphosphate kinase OS=Apis mellifera OX=7460 PE=3 SV=1		0	FALSE	64.67	72	11	91	11	154	17.6	7.33	15.88	15.24		6.03	4.67	10.52	27.46	5.69	6.44	8.02		12.9	6.96	21.25	0	7.66	8.83	7.62	7.17	2.7	5	5		5	2	4	9	3	3	5		4	6	6
FALSE	High	Master Protein	A0A088A6N0	Nudix hydrolase domain-containing protein OS=Apis mellifera OX=7460 GN=mRpL46 PE=4 SV=1		0	FALSE	34.044	20	6	24	6	269	31.1	8.59	15.1	0			2.87		4.09		0				0			10.34	2.27	5.57	0	2.07	3	1			1		2		1				1
FALSE	High	Master Protein	A0A088AEE0	O-acyltransferase OS=Apis mellifera OX=7460 GN=LOC552313 PE=3 SV=1		0.004	FALSE	3.906	2	1	2	1	531	62.5	8.91							1.96										1.84										1
FALSE	High	Master Protein	A0A088ASQ1	Obg-like ATPase 1 OS=Apis mellifera OX=7460 GN=LOC413266 PE=3 SV=1		0	FALSE	99.207	52	16	60	16	397	44.6	7.78	22.46	3.7		4.17		13.51	0	2.49	2.1	0	7.16	1.71	2.69	22.25		33.18		3.89	18.51	2.8	7	2		2		3	1	1	2	1	6	2	2	7
FALSE	High	Master Protein	A0A087ZSV5	OBG-type G domain-containing protein OS=Apis mellifera OX=7460 GN=LOC411280 PE=4 SV=1		0	FALSE	19.19	12	3	5	3	367	41	8.87	3.07									2.7				7.28		1.68					1									1				2
FALSE	High	Master Protein	A0A088A3J5	OCIA domain-containing protein OS=Apis mellifera OX=7460 GN=asrij PE=4 SV=1		0	FALSE	57.386	64	9	69	9	233	27.2	5.12	12.01	2.34	5.25	0	13.84	8.58	10.91	9.04	2.67	0	0	1.99		8.94		18.25	9.09	9.9	14.28	2.76	1	3	2	1	2	2	3	2	1	1	2	2		3
FALSE	High	Master Protein	A0A088AW16	Oligosaccharyltransferase complex subunit OS=Apis mellifera OX=7460 PE=3 SV=1		0	FALSE	8.567	11	1	21	1	110	13	9.23	3.59	2.81	2.22	1.91	5.75	2.82	5.38		2.55							6.2	5.59	6.71	5.85	5.23	1	1	1	1	1	1	1		1
FALSE	High	Master Protein	A0A0B4J2P4	OMPdecase domain-containing protein OS=Apis mellifera OX=7460 PE=3 SV=1		0	FALSE	6.952	4	1	5	1	468	52.2	8.63	5								0							3.26			2.31		1								1
FALSE	High	Master Protein	A0A088AFG9	Ornithine aminotransferase OS=Apis mellifera OX=7460 GN=Oat PE=3 SV=1		0	FALSE	420.26	76	30	693	30	425	47.3	8.29	422.19		14.1	43.79	64.64	223.34		157.66	52.02	20.63	57.18	47.88	8.42	360.01		242.57		248.47	163.96	46.56	30		8	16	14	23		23	14	8	12	12	3	19
FALSE	High	Master Protein	A0A088A9V1	Oxidored_q6 domain-containing protein OS=Apis mellifera OX=7460 GN=Ndufs7 PE=3 SV=1		0	FALSE	78.619	50	9	202	9	223	24.9	9.31	42.45	20.86	21.42	14.29	29.87	26.21	26.21	33.26	17.62	7.68	17.44	15.45	32.29	22.47	8.57	26.71	23.75	33.58	20.2	19.67	8	5	6	5	7	5	7	8	5	3	3	4	6	4
FALSE	High	Master Protein	A0A088AUS5	Oxysterol-binding protein OS=Apis mellifera OX=7460 PE=3 SV=1		0	FALSE	8.07	3	2	4	2	708	80.6	6.61	2.67								2.61					0			1.73				1								1					1
FALSE	High	Master Protein	A0A088A6G0	Oxysterol-binding protein OS=Apis mellifera OX=7460 PE=3 SV=1		0	FALSE	8.702	5	4	8	4	1034	116.3	7.4	0					1.66	0							0		2.85	2.81				1					1	1							1
FALSE	High	Master Protein	A0A088ATI3	PABS domain-containing protein OS=Apis mellifera OX=7460 GN=LOC410080 PE=4 SV=1		0	FALSE	50.528	36	11	26	11	366	41.2	5.07	9.32			2.43		9.25			1.78		3.3	2.6	4.99	7.16		18.23			12.33		3			2		4			1		1	1	1	2
FALSE	High	Master Protein	A0A088AVY2	PALP domain-containing protein OS=Apis mellifera OX=7460 GN=Cbs PE=4 SV=1		0	FALSE	5.264	4	1	2	1	447	49.6	6.77	2.62															2.43					1
FALSE	High	Master Protein	A0A088AL15	ParB domain-containing protein OS=Apis mellifera OX=7460 PE=3 SV=1		0	FALSE	13.065	5	1	19	1	426	47.3	9.2	7.38	0			0	5.32	1.98	2.08								5	0	4.5	0		1	1			1	1	1	1
FALSE	High	Master Protein	A0A088AQD2	PCI domain-containing protein OS=Apis mellifera OX=7460 GN=411843 PE=4 SV=1		0	FALSE	12.44	10	2	2	2	282	30.6	5.99	3.19													4.17							1													1
FALSE	High	Master Protein	A0A088AST3	PCI domain-containing protein OS=Apis mellifera OX=7460 GN=LOC408397 PE=4 SV=1		0	FALSE	113.098	47	14	55	14	423	47.4	6.48	42.09	3.76		3.28		6.41	8.13		2.39		3.72	3.23	0	31.02		25.01	6.36	5.17	8.88		8	2		2		2	3		2		1	2	1	8
FALSE	High	Master Protein	A0A088AJ83	PCI domain-containing protein OS=Apis mellifera OX=7460 GN=LOC409062 PE=4 SV=1		0	FALSE	14.434	8	3	5	3	444	51.5	5.82	3.05															2.17					2
FALSE	High	Master Protein	A0A088AUX6	PCI domain-containing protein OS=Apis mellifera OX=7460 GN=LOC552319 PE=4 SV=1		0	FALSE	42.082	21	7	15	7	389	45.6	6.01	13.82			0			0				1.97			5.17		8.08	2.82		2.65		3			1			1				1			2
FALSE	High	Master Protein	A0A087ZZE8	PCI domain-containing protein OS=Apis mellifera OX=7460 GN=PCID2 PE=4 SV=1		0	FALSE	6.671	7	2	3	2	393	45.5	8.47	2.09															1.75					2
FALSE	High	Master Protein	A0A088A0Z2	PCI domain-containing protein OS=Apis mellifera OX=7460 GN=Rpn12 PE=4 SV=1		0	FALSE	36.295	21	4	13	4	266	30.4	5.07	7.34						2.4				2.12	2.34	1.75	18.9		2.42			3.01		2						1				1	1	1	3
FALSE	High	Master Protein	A0A088ASB8	PCI domain-containing protein OS=Apis mellifera OX=7460 GN=Rpn3 PE=4 SV=1		0	FALSE	79.426	32	13	63	13	495	56.9	8.28	28.5			3.92	0	9.99	8.4	2.76	3.25		5.26	1.8	3.46	41.05		27.35	6.64	5.89	11.15		8			3	1	3	5	1	1		3	1	3	7
FALSE	High	Master Protein	A0A088AD77	PCI domain-containing protein OS=Apis mellifera OX=7460 PE=4 SV=1		0	FALSE	31.56	23	5	13	5	411	47.2	5.54	3.32				0	5.59	0					0		14.39		6.59			3.45		1				1	1	1					1		3
FALSE	High	Master Protein	A0A088AM61	PCI domain-containing protein OS=Apis mellifera OX=7460 PE=4 SV=1		0	FALSE	89.026	39	12	107	12	455	52.2	6.98	41.23	2.72	2.34	2.99	2.06	19.99	14.43	5.39	3.74	3.16	6.37	2.14	1.78	26.12		48.72	7.58	17.24	30.48	3.32	8	1	1	2	2	8	6	3	2	2	3	3	2	7
FALSE	High	Master Protein	A0A088AP80	PCI domain-containing protein OS=Apis mellifera OX=7460 PE=4 SV=1		0	FALSE	6.581	3	1	2	1	477	54.4	7.01	3.46															2.81					1
FALSE	High	Master Protein	A0A088ANZ5	PCI domain-containing protein OS=Apis mellifera OX=7460 PE=4 SV=1		0	FALSE	16.146	10	2	2	2	418	47.5	5.72	1.97													6.24							1													1
FALSE	High	Master Protein	A0A088AD16	PCI domain-containing protein OS=Apis mellifera OX=7460 PE=4 SV=1		0	FALSE	59.682	29	10	56	10	373	42.3	6.71	28.38		0	1.95		8.04	4.34	2.22			8.84	2	3.79	15.59		22.28	2.05		12	0	6		2	3		2	2	2			3	3	2	3
FALSE	High	Master Protein	A0A088AUT1	PDZ domain-containing protein OS=Apis mellifera OX=7460 GN=LOC413207 PE=4 SV=1		0	FALSE	58.267	35	7	61	7	260	28.5	6.11	15.27	19.3	3.28	15.69		6.86	12.38	8.57	5.85	9.38	16.4	19.34	2.28	22.49		4.07	3.41	4.9	4.04	7.59	5	4	2	4		2	3	3	2	3	3	5	1	3
FALSE	High	Master Protein	A0A087ZSQ2	PDZ domain-containing protein OS=Apis mellifera OX=7460 GN=LOC552503 PE=4 SV=1		0.009	FALSE	3.02	5	1	1	1	346	38.8	6.38	2.14																				1
FALSE	High	Master Protein	A0A088A899	PDZ domain-containing protein OS=Apis mellifera OX=7460 PE=4 SV=1		0	FALSE	8.505	18	2	2	2	145	16.1	10.18												1.64																				2
FALSE	High	Master Protein	A0A088AHV6	PDZ domain-containing protein OS=Apis mellifera OX=7460 PE=4 SV=1		0	FALSE	32.075	31	4	14	4	168	18.8	9.44				2.07	4.12	3.59				4.28	14.84	3.8		1.67										1	1	2				1	3	3		1
FALSE	High	Master Protein	A0A087ZY53	Peptidase A1 domain-containing protein OS=Apis mellifera OX=7460 GN=cathD PE=3 SV=1		0	FALSE	174.909	59	16	312	16	385	42.2	6.32	75.06	15.93	20.43	61.03	59.23	55.05	22.49	64.84	47.16	19.38	8.56	2.7	2.8	71.98	12.4	79.39	20.72	77.31	36.48	52.98	11	5	6	12	11	10	8	10	10	5	3	1	2	10
FALSE	High	Master Protein	A0A088ALY6	Peptidase S1 domain-containing protein OS=Apis mellifera OX=7460 GN=100576326 PE=3 SV=1		0	FALSE	8.824	6	2	3	2	417	45.9	5.71	2.13			0										2.28							1			1										1
FALSE	High	Master Protein	A0A088A9M1	Peptidase S1 domain-containing protein OS=Apis mellifera OX=7460 GN=SP22 PE=3 SV=1		0	FALSE	9.655	12	3	8	3	259	28	8.81				2.05					4.93				0			2.53								1					1				2
FALSE	High	Master Protein	A0A088ADM5	Peptidase S1 domain-containing protein OS=Apis mellifera OX=7460 GN=SP3 PE=3 SV=1		0	FALSE	14.901	14	3	6	3	353	39.5	6.81	9.27																0				3
FALSE	High	Master Protein	A0A088AGZ8	Peptidase S1 domain-containing protein OS=Apis mellifera OX=7460 GN=SP36 PE=3 SV=1		0	FALSE	80.024	56	9	80	9	263	28.1	7.68	14.2		17.13	23.58		9.63		6.73	41.21	5.1	0		9.68			23.55		3.53	12.71		3		4	6		3		3	7	2	1		3
FALSE	High	Master Protein	A0A088A984	Peptidase S1 domain-containing protein OS=Apis mellifera OX=7460 GN=SP44 PE=3 SV=1		0.002	FALSE	4.465	4	1	1	1	325	36.6	5.96									0																				1
FALSE	High	Master Protein	A0A087ZVC3	Peptidase S1 domain-containing protein OS=Apis mellifera OX=7460 GN=SPH54 PE=4 SV=1		0	FALSE	10.027	1	3	6	3	2733	301.1	4.48	2.02						0				2.08	0									1						1				3	1
FALSE	High	Master Protein	A0A087ZN40	Peptidase S1 domain-containing protein OS=Apis mellifera OX=7460 PE=3 SV=1		0	FALSE	65.34	35	7	128	7	276	29.4	8.75	34.77		36.8	48.14		23.47		12.28	58.74	17.32	9.57		21.59	5.59		21.97	12.7	2.34	13.98		5		7	7		6		5	7	6	4		4	2
FALSE	High	Master Protein	A0A088A359	Peptidase S1 domain-containing protein OS=Apis mellifera OX=7460 PE=3 SV=1		0.004	FALSE	3.961	3	1	2	1	391	43.7	5.39																		2.17	1.97
FALSE	High	Master Protein	A0A087ZWJ6	Peptidase S59 domain-containing protein OS=Apis mellifera OX=7460 GN=Nup98 PE=4 SV=1		0	FALSE	22.133	4	4	10	4	1818	198.8	6.81	8.41	1.8		2.02	3.51	3.51					2.1					4.65		3.33			2	1		1	1	1					1
FALSE	High	Master Protein	A0A088A6L1	Peptidase S72 domain-containing protein OS=Apis mellifera OX=7460 GN=100576978 PE=4 SV=1		0	FALSE	43.893	27	5	45	3	276	31.2	6.25	2.57	4.47	0	0	9.2	7.68	2.6	2.21	1.93	1.99	6.34	4.06		6.01		7.98	4.44	8.37	6.2	2.5	1	2	1	1	2	2	1	1	1	1	2	2		2
FALSE	High	Master Protein	A0A088ADK3	Peptidase_M24 domain-containing protein OS=Apis mellifera OX=7460 GN=LOC412221 PE=4 SV=1		0	FALSE	39.882	29	8	19	8	387	43.8	7.5	15.16					5.21					4.41			8.51		17.26			2.87		5					2					2			3
FALSE	High	Master Protein	A0A088AJR6	Peptidase_M28 domain-containing protein OS=Apis mellifera OX=7460 GN=LOC410149 PE=4 SV=1		0	FALSE	8.554	5	2	2	2	479	52.9	5.43									5.76																				2
FALSE	High	Master Protein	A0A088ATY2	Peptidase_M28 domain-containing protein OS=Apis mellifera OX=7460 GN=LOC411943 PE=4 SV=1		0.009	FALSE	2.918	3	1	2	1	348	40.3	6.76	0															0					1
FALSE	High	Master Protein	A0A087ZYD9	Peptidase_M28 domain-containing protein OS=Apis mellifera OX=7460 PE=4 SV=1		0	FALSE	12.848	4	3	8	3	882	100.1	8.44	2.81				2.26		0	0						4.74		3.24	0				1				1		1	1						2
FALSE	High	Master Protein	A0A087ZW90	Peptidase_M3 domain-containing protein OS=Apis mellifera OX=7460 GN=LOC412154 PE=3 SV=1		0	FALSE	93.148	31	17	72	17	755	87.5	8.38	20.61	2.45	0	0	0	7.76	3.71	4.95	1.79		11.39	2.27	10.26	20.13		29.25	1.71	10.51	7.52	2.04	8	1	2	3	1	4	2	3	1		5	2	7	6
FALSE	High	Master Protein	A0A087ZUX9	Peptidase_M3 domain-containing protein OS=Apis mellifera OX=7460 PE=3 SV=1		0	FALSE	21.729	9	4	12	4	694	79.8	8.02	6.06					4.94		1.88						4.24		8.97	1.8		2.39		2					2		1						2
FALSE	High	Master Protein	A0A088AHN3	Peptidase_S9 domain-containing protein OS=Apis mellifera OX=7460 PE=4 SV=1		0	FALSE	23.701	8	5	10	5	709	80.8	6.54	5.32				2.51			6.62	2.32	2.02				3.47							2				2			3	1	1				1
FALSE	High	Master Protein	A0A088AFK3	Peptide deformylase OS=Apis mellifera OX=7460 GN=102654737 PE=3 SV=1		0	FALSE	6.455	9	2	9	2	233	27.1	6.98					0	0		0	0									4.28	1.71	0					1	1		1	1
FALSE	High	Master Protein	A0A093SWA8	Peptidoglycan-associated outer membrane lipoprotein OS=Pectobacterium carotovorum subsp. carotovorum OX=555 GN=KP17_05985 PE=3 SV=1		0	FALSE	23.232	22	3	6	3	170	18.5	6.79			2.3																12.57				1
FALSE	High	Master Protein	A0A088A8D4	Peptidyl-prolyl cis-trans isomerase OS=Apis mellifera OX=7460 GN=LOC409890 PE=3 SV=1		0	FALSE	77.827	52	10	201	9	209	22.8	9.14	83.93	10.66	0	21.53	6.3	22.73	12.6	8.04	3.37	5.29	38.28	32.75	58.87	64.08	0	57.47	3.86		11.56	5.63	8	4	1	7	3	6	4	2	2	2	7	5	7	7
FALSE	High	Master Protein	A0A088AVK4	Peptidyl-prolyl cis-trans isomerase OS=Apis mellifera OX=7460 GN=LOC726409 PE=3 SV=1		0	FALSE	6.12	8	1	2	1	184	20.3	7.24	3.52															2.31					1
FALSE	High	Master Protein	A0A088A5R9	Peptidyl-prolyl cis-trans isomerase OS=Apis mellifera OX=7460 PE=3 SV=1		0	FALSE	65.545	66	10	53	9	184	20.1	8.68	18.43	2.69	0	4.75	0	5.92	6.5				6.52	7.2	1.68	32.01		29.13		4.68			4	3	1	4	1	2	2				1	4	1	5
FALSE	High	Master Protein	A0A088ABX3	Peptidylprolyl isomerase OS=Apis mellifera OX=7460 GN=FK506-bp1 PE=4 SV=1		0	FALSE	34.787	14	4	20	4	354	40.4	4.89	16.57					2.29	4.68	2.05			3.23		0	9.18		9.98	2.19		2.44		4					1	3	1			1		1	2
FALSE	High	Master Protein	A0A088A2S8	Peptidylprolyl isomerase OS=Apis mellifera OX=7460 GN=FK506-bp2 PE=4 SV=1		0	FALSE	18.736	29	2	8	2	109	11.8	7.99	5.86			2.17								2.9	5.99	3.4		3.47					1			1								1	1	1
FALSE	High	Master Protein	A0A087ZPR8	Peptidylprolyl isomerase OS=Apis mellifera OX=7460 GN=FKBP59 PE=4 SV=1		0	FALSE	32.202	20	6	11	6	459	51.5	5.58	4.67			3.87	0			1.66			1.82			2.96		8.21					1			3	1			1			1			1
FALSE	High	Master Protein	A0A088A5M5	Peptidylprolyl isomerase OS=Apis mellifera OX=7460 GN=LOC550701 PE=4 SV=1		0	FALSE	9.104	9	3	3	3	382	43.2	6.73																1.96	2.07		2.05
FALSE	High	Master Protein	A0A088AAR9	Peptidylprolyl isomerase OS=Apis mellifera OX=7460 PE=4 SV=1		0	FALSE	26.144	29	4	12	4	164	18.4	4.78	2.9	7.65					2.44			1.65		1.64	2.49	6.11		0					1	2					1			1		1	2	1
FALSE	High	Master Protein	A0A088A340	Peptidylprolyl isomerase OS=Apis mellifera OX=7460 PE=4 SV=1		0	FALSE	11.123	32	2	11	2	88	9.6	8.5		4.3	0	0			5.15					2.22	3.13	0						0		1	1	1			1					1	2	1
FALSE	High	Master Protein	A0A087ZYL4	Peroxiredoxin OS=Apis mellifera OX=7460 GN=Prx5 PE=3 SV=1		0	FALSE	51.635	46	5	89	5	185	20.2	8.84	28.41	5.49	2.1	11.64	3.2	17.92	22.99	11.71		3.16	12.63	12.45	21.04	18.89		20.75	3.49	9.87	15.09	7.61	4	3	2	2	1	4	4	3		1	2	4	5	3
FALSE	High	Master Protein	A0A093SIR9	Peroxiredoxin OS=Pectobacterium carotovorum subsp. carotovorum OX=555 GN=KP17_12640 PE=4 SV=1		0	FALSE	8.483	15	2	2	2	200	22.1	6.21			4.84																				2
FALSE	High	Master Protein	A0A088A9F5	Pex14_N domain-containing protein OS=Apis mellifera OX=7460 GN=LOC552256 PE=4 SV=1		0	FALSE	12.462	26	3	6	3	265	30	6.29	3.25						3.28										2.93		2.74		1						1
FALSE	High	Master Protein	A0A088ARH8	PfkB domain-containing protein OS=Apis mellifera OX=7460 PE=4 SV=1		0	FALSE	12.401	12	3	3	3	322	35.1	6.98											1.8		0			3.98															1		1
FALSE	High	Master Protein	A0A088AFQ2	PH domain-containing protein OS=Apis mellifera OX=7460 GN=LOC408836 PE=4 SV=1		0	FALSE	18.926	6	3	17	3	713	81.1	6.8	11.18			2.68	3.56	3.85		0	0	3.03	3.2					4.01	2.44	2.73	3.51	0	2			2	1	1		1	1	1	1
FALSE	High	Master Protein	A0A087ZUN9	PH domain-containing protein OS=Apis mellifera OX=7460 PE=4 SV=1		0	FALSE	35.744	12	6	8	6	792	90	6.24	2.61							1.99			3.04			12.24		3.17					1							1			1			3
FALSE	High	Master Protein	A0A088A9W3	PHB domain-containing protein OS=Apis mellifera OX=7460 GN=Flo1 PE=3 SV=1		0	FALSE	65.524	33	13	76	13	429	47.5	5.55	9.97	10.53	0	2.35	5.4	10.94	19.03	7.26	2.48	2.42	9.75	8.31	2.13	22.16	1.88	14.13	12.78	23.4	6.63	7.9	3	3	2	2	1	3	7	2	1	1	4	6	1	7
FALSE	High	Master Protein	A0A088AJY9	PHB domain-containing protein OS=Apis mellifera OX=7460 GN=Flo2 PE=3 SV=1		0	FALSE	140.53	65	19	178	19	402	44	5.73	32.36	34.31	12.26	7.69	15.35	40.57	44.35	22.68	2.05	2.45	14.4	14.71	2.6	30.16	2.5	40.55	43.98	60.53	20.32	12.95	9	10	7	3	5	10	12	8	1	4	7	7	2	6
FALSE	High	Master Protein	A0A088AD80	PHB domain-containing protein OS=Apis mellifera OX=7460 GN=LOC551427 PE=4 SV=1		0	FALSE	20.447	9	2	3	2	324	37.2	6.33														5.21		3.69																		1
FALSE	High	Master Protein	A0A088AMB1	PHB domain-containing protein OS=Apis mellifera OX=7460 GN=LOC551944 PE=4 SV=1		0	FALSE	167.191	55	15	751	15	353	39.5	9.06	113.21	63.25	86.02	69.97	85.78	87.5	94.37	106.65	66.93	49.09	145.47	73.57	106.12	235.63	32.75	101.67	95.64	106.66	82.33	80.85	12	12	13	13	13	13	14	13	11	11	8	10	8	8
FALSE	High	Master Protein	A0A087ZYC8	PHB domain-containing protein OS=Apis mellifera OX=7460 PE=4 SV=1		0	FALSE	91.702	50	13	162	13	380	42.7	8.43	34.16	16.64	17.17	5.37	28.22	23.44	18.2	29.98	13.71	4.51	18.89	14.98	15.97	23.41	2.17	32.06	17.34	30.12	28.42	11.21	6	5	8	3	6	5	5	7	6	3	6	5	4	7
FALSE	High	Master Protein	A0A087ZN35	Phorbol-ester/DAG-type domain-containing protein OS=Apis mellifera OX=7460 PE=4 SV=1		0	FALSE	9.041	25	3	7	3	143	15.6	9.63	4.78	0				0	0									0					1	2				1	1
FALSE	High	Master Protein	A0A088AHV4	Phos_pyr_kin domain-containing protein OS=Apis mellifera OX=7460 GN=LOC552663 PE=4 SV=1		0	FALSE	36.222	30	7	27	7	296	33.3	6.55	7.02			7.66	1.84	1.97	1.77		2.43		2.3	2.01	1.91	14.22		7.43			5.18		2			3	1	1	1		1		1	3	3	3
FALSE	High	Master Protein	A0A088ASM4	Phosphate carrier OS=Apis mellifera OX=7460 GN=LOC413517 PE=2 SV=1		0	FALSE	169.961	61	24	904	24	354	39.1	9.1	98.44	92.84	140.78	78.91	104.81	105.68	99.5	144.94	92.46	53.5	193.25	53.17	132.2	88.77	43.86	83.4	101.67	100.06	74	79.91	15	15	19	17	16	16	15	18	16	13	11	10	12	11
FALSE	High	Master Protein	A0A088AAD6	Phosphatidylinositol-4,5-bisphosphate 4-phosphatase OS=Apis mellifera OX=7460 GN=LOC408301 PE=4 SV=1		0	FALSE	11.548	13	2	11	2	253	27.3	8.4	4.04	3.67			3.43		0										3.61	0	3.54		1	1			1		1
FALSE	High	Master Protein	A0A087ZT55	Phosphodiesterase OS=Apis mellifera OX=7460 GN=dnc PE=3 SV=1		0	FALSE	19.326	8	3	8	3	534	59.7	5.02						2.61		0			3.3	1.96		3.71		5.75			2.65							1		1			1	1		1
FALSE	High	Master Protein	A0A087ZNJ8	Phosphoglycerate kinase OS=Apis mellifera OX=7460 GN=Pgk PE=3 SV=1		0	FALSE	251.955	72	25	240	25	415	45	8.12	114.71	20.05	0	14.99	19.09	50.07	22.95	4.04	2.67	6.76	37.45	26.49	38.77	77.71		118.26			50.43	3.5	19	7	1	7	7	13	11	3	1	3	12	10	14	17
FALSE	High	Master Protein	A0A088A4K0	Phosphoglycerate mutase OS=Apis mellifera OX=7460 PE=3 SV=1		0	FALSE	136.813	60	16	162	16	312	35.3	9.35	35.04	8.24	0	39.97	11.83	19.7	10.64	9.72	13.89	13.81	15.49	19.61	33.81	31.64		36.92	13.64	3.18	42.85	16.95	7	4	1	11	4	5	5	4	3	5	4	8	8	7
FALSE	High	Master Protein	B7UUK1	Phospholipase A2 OS=Apis mellifera OX=7460 GN=pla2 PE=2 SV=1		0	FALSE	80.57	60	9	56	9	167	19	7.39				1.82	35.16				1.82	67.29														1	8				3	9
FALSE	High	Master Protein	A0A088AVA3	Phospholipid-transporting ATPase OS=Apis mellifera OX=7460 GN=LOC552074 PE=3 SV=1		0.003	FALSE	4.018	1	1	2	1	1205	136.3	6.32							0										2.06										1
FALSE	High	Master Protein	A0A088A245	Phosphomannomutase OS=Apis mellifera OX=7460 GN=LOC550926 PE=3 SV=1		0	FALSE	39.73	39	7	27	7	262	30.4	5.95	12.23	0		3.07	1.88	5.2					5.69			8.13		18.52	2.61	8.7	2.73	0	4	1		2	2	2					2			2
FALSE	High	Master Protein	A0A088ADN5	Phosphotransferase OS=Apis mellifera OX=7460 GN=LOC408818 PE=3 SV=1		0	FALSE	47.827	20	7	25	7	470	52.4	5.35	28.15					5.18		5.48	0			5.17		2.92		15.83					6					2		2	1			3		1
FALSE	High	Master Protein	A0A088A6W8	Phosphotransferase OS=Apis mellifera OX=7460 PE=3 SV=1		0	FALSE	201.761	63	20	198	20	445	49.6	6.27	58.6		5.79	5.02	37.7	11.46		18.68	35.42	15.74			1.65	115.78	13.55	46.06		84.31	39.41	44.12	13		3	3	10	3		5	10	5			1	13
FALSE	High	Master Protein	A0A087ZS23	PID domain-containing protein OS=Apis mellifera OX=7460 GN=ced-6 PE=4 SV=1		0	FALSE	31.701	16	6	16	6	459	51.1	6.7	7.75			0	2.47	3.64	0				0			6.39		5.72		3.29	1.78		4			1	1	1	1				1			2
FALSE	High	Master Protein	A0A087ZN43	Piezo-type mechanosensitive ion channel component OS=Apis mellifera OX=7460 PE=3 SV=1		0.004	FALSE	3.903	0	1	1	1	2681	310.5	8.32														2.3																				1
FALSE	High	Master Protein	A0A0M4IQS3	Pilus assembly protein OS=Serratia marcescens OX=615 GN=AR325_09840 PE=4 SV=1		0.002	FALSE	4.186	11	2	2	2	175	18.1	5.54																				1.66
FALSE	High	Master Protein	A0A088AMH9	PIPK domain-containing protein OS=Apis mellifera OX=7460 GN=LOC409276 PE=4 SV=1		0	FALSE	7.651	5	2	2	2	494	56.7	7.52	1.77								3.04												1								1
FALSE	High	Master Protein	A0A088AUC9	PIPK domain-containing protein OS=Apis mellifera OX=7460 PE=4 SV=1		0	FALSE	8.73	5	1	1	1	586	66.1	8.46														4.55																				1
FALSE	High	Master Protein	A0A088ATI9	PKS_ER domain-containing protein OS=Apis mellifera OX=7460 GN=LOC408643 PE=4 SV=1		0	FALSE	86.637	37	10	94	10	401	44.2	6.15	47.64	2.49		5.49	3.6	14.6	5.11	11.12	2.04	8.59	4.65	0	3.54	11.78		40.98	2.92	8.48	8.4	7.42	8	3		6	3	3	2	5	1	4	1	2	3	4
FALSE	High	Master Protein	A0A088A347	PKS_ER domain-containing protein OS=Apis mellifera OX=7460 GN=LOC409207 PE=4 SV=1		0.001	FALSE	4.813	3	1	1	1	471	51.3	5.76	2.32																				1
FALSE	High	Master Protein	A0A088AD00	PKS_ER domain-containing protein OS=Apis mellifera OX=7460 GN=LOC410167 PE=4 SV=1		0	FALSE	102.5	61	13	120	13	338	36.7	8.02	29.81		0	16.14	20.65	43.14		35.26	18.87	30.16	1.68	0	0	15.75		39.58		13.66	35.34	18.87	4		2	6	3	9		6	6	8	2	2	1	4
FALSE	High	Master Protein	A0A088AP84	PKS_ER domain-containing protein OS=Apis mellifera OX=7460 GN=LOC411304 PE=4 SV=1		0	FALSE	7.986	6	2	7	2	388	42.8	9.17	2.37					2.49	4.37	1.75									2.25		3.05		1					1	2	1
FALSE	High	Master Protein	A0A088ABQ7	PKS_ER domain-containing protein OS=Apis mellifera OX=7460 GN=LOC552665 PE=4 SV=1		0.003	FALSE	4.087	3	1	1	1	386	42.6	6.16											1.74																				1
FALSE	High	Master Protein	A0A087ZU72	PKS_ER domain-containing protein OS=Apis mellifera OX=7460 PE=3 SV=1		0	FALSE	174.27	58	19	264	18	364	39.8	7.8	73.38	14.16	7.12	18.76	73.43	54.76	23.88	69.33	35.17	25.56	9.84	9.9	8.25	111.13		91.22	2	29.97	72.89	40.64	11	5	2	6	8	10	4	11	7	5	3	5	3	13
FALSE	High	Master Protein	A0A087ZXT8	PKS_ER domain-containing protein OS=Apis mellifera OX=7460 PE=4 SV=1		0	FALSE	134.465	53	12	170	12	342	38.1	9.04	63.92	39.26	5.38	13.47	12.74	46.18	67.3	19	6.58	2.4	14.6	19.68	6.78	96.59		31.19	21.22	40.14	25.9	20.37	8	6	2	6	3	8	9	5	1	1	5	6	3	9
FALSE	High	Master Protein	A0A088AE44	PLAC domain-containing protein OS=Apis mellifera OX=7460 GN=LOC409970 PE=4 SV=1		0	FALSE	269.036	56	25	338	25	629	70	7.23	32.24	45.66	5.41	4.98	104.26	46.88	40.15	29.34	15.54	54.92	18.79	14.88		33.33	9.27	13.21	33.79	6.94	56	126.37	10	15	3	6	20	15	9	12	7	15	6	6		9
FALSE	High	Master Protein	A0A088AHM2	PlsC domain-containing protein OS=Apis mellifera OX=7460 GN=LOC552688 PE=4 SV=1		0	FALSE	10.453	8	2	7	2	376	44	8.87	2.64	0				2.32	5.5										3.27				1	1				1	2
FALSE	High	Master Protein	A0A088ALS3	PlsC domain-containing protein OS=Apis mellifera OX=7460 PE=4 SV=1		0	FALSE	29.85	42	8	13	8	273	31.6	9.55		2.04	2.02		0		0				2.44	0		9.49		2.93						1	1		1		1				1	2		4
FALSE	High	Master Protein	A0A087ZSU4	Plug_translocon domain-containing protein OS=Apis mellifera OX=7460 GN=Sec61alpha PE=3 SV=1		0	FALSE	40.172	18	6	48	6	476	52.4	8.38	11.81	4.85	4.85	2.21	2.35	2.5	15.47	2.58			2.14	3.46	0	13.47		5.4	2.87	5.79	4	4.21	3	2	2	2	2	2	3	2			1	3	1	3
FALSE	High	Master Protein	A0A087ZWP1	PNP_UDP_1 domain-containing protein OS=Apis mellifera OX=7460 GN=LOC411599 PE=4 SV=1		0	FALSE	11.066	4	1	1	1	362	41.2	8.91	3.82																				1
FALSE	High	Master Protein	A0A088A8E1	PNP_UDP_1 domain-containing protein OS=Apis mellifera OX=7460 PE=4 SV=1		0.006	FALSE	3.362	4	1	1	1	599	67.1	6.49																0
FALSE	High	Master Protein	A0A087ZQX2	Poly [ADP-ribose] polymerase OS=Apis mellifera OX=7460 PE=4 SV=1		0	FALSE	7.161	7	2	5	2	381	43.5	8.46		0					2.06									1.72	0	1.67				1					1
FALSE	High	Master Protein	A0A088ANK9	Polypeptide N-acetylgalactosaminyltransferase OS=Apis mellifera OX=7460 GN=GalNAc-T2 PE=3 SV=1		0	FALSE	5.442	2	1	1	1	581	67.5	7.93														3.37																				1
FALSE	High	Master Protein	A0A088AEG6	Polypeptide N-acetylgalactosaminyltransferase OS=Apis mellifera OX=7460 PE=3 SV=1		0	FALSE	33.757	9	5	9	5	635	71.5	7.94	3.59													18.2		0					2													4
FALSE	High	Master Protein	A0A221FXS8	Porin OmpA OS=Serratia marcescens OX=615 GN=BVG93_05580 PE=3 SV=1		0	FALSE	32.225	23	7	15	4	359	38.3	8.24			18.35					2.69		0			0					1.89		9.8			3					1		1			1
FALSE	High	Master Protein	A0A088AAV3	PPM-type phosphatase domain-containing protein OS=Apis mellifera OX=7460 GN=LOC551020 PE=3 SV=1		0.002	FALSE	4.3	5	1	1	1	329	36.9	6.61	2.04																				1
FALSE	High	Master Protein	A0A088AUX7	PRA1 family protein OS=Apis mellifera OX=7460 GN=LOC410130 PE=3 SV=1		0	FALSE	27.842	32	5	70	5	196	22.4	9.22	12.21	7.35	0	7.77	6.19	19.98	12.1	7.71	11.5	2.59		0	0		0	10.11	17.35	12.37	10.51	7.92	4	4	1	3	2	4	3	3	3	2		1	1
FALSE	High	Master Protein	C5C9J9	Predicted transcriptional regulator OS=Micrococcus luteus (strain ATCC 4698 / DSM 20030 / JCM 1464 / NBRC 3333 / NCIMB 9278 / NCTC 2665 / VKM Ac-2230) OX=465515 GN=Mlut_06140 PE=4 SV=1		0.006	FALSE	3.475	6	2	3	2	129	14.3	5.05							1.96			1.98	1.82																1			1	1
FALSE	High	Master Protein	A0A088AD29	Prenylcys_lyase domain-containing protein OS=Apis mellifera OX=7460 PE=4 SV=1		0.001	FALSE	4.87	3	1	3	1	486	55.5	8.41					2.71				1.64							2.93									1				1
FALSE	High	Master Protein	A0A088AR33	Pribosyltran domain-containing protein OS=Apis mellifera OX=7460 GN=Aprt PE=3 SV=1		0	FALSE	47.468	43	5	43	5	178	20	6.05	12.22			2.85	5.48	6.23	2.52	1.72	3.33					8.38	0	10.94		2.96	20.68	4.89	3			2	2	3	1	2	1					1
FALSE	High	Master Protein	A0A087ZTI8	Pribosyltran_N domain-containing protein OS=Apis mellifera OX=7460 GN=LOC551448 PE=4 SV=1		0	FALSE	19.17	7	2	3	2	370	40.5	8.27													1.77	5.29																			1	1
FALSE	High	Master Protein	A0A088AJA4	Probable methylthioribulose-1-phosphate dehydratase OS=Apis mellifera OX=7460 GN=LOC552014 PE=3 SV=1		0.002	FALSE	4.141	11	2	2	2	225	26	6.93					0				0																1				1
FALSE	High	Master Protein	A0A0B4J2M8	Probable tRNA N6-adenosine threonylcarbamoyltransferase OS=Apis mellifera OX=7460 GN=LOC411654 PE=3 SV=1		0	FALSE	18.862	12	3	6	3	335	37.3	6.52	4.67					3.6								4.05		5.11		3.07			1					1								1
FALSE	High	Master Protein	A0A087ZNT2	Profilin OS=Apis mellifera OX=7460 GN=PRF PE=3 SV=1		0	FALSE	77.209	73	6	75	6	126	13.8	5.92	33.33	8.83	6.15	4.14		6.59	10.33	1.65	6.04	5.09	5.31	2.71	12.88	37.81		28.9	2.1		7.08	6.27	5	4	2	3		3	4	2	3	3	2	1	6	6
FALSE	High	Master Protein	A0A088AGQ1	Prohibitin OS=Apis mellifera OX=7460 GN=LOC408412 PE=3 SV=1		0	FALSE	214.786	81	17	1012	17	271	30	7.06	157.41	123.07	128.1	76.21	144.64	114.17	120.96	146.02	86.45	82.29	185.67	111.22	221.12	230.37	64.67	137.27	125.72	142.15	126.35	107.59	12	15	16	13	13	13	13	15	12	12	12	13	15	15
FALSE	High	Master Protein	F1DFM1	Projectin long variant (Fragment) OS=Apis mellifera OX=7460 GN=PEVK PE=2 SV=1		0	FALSE	95.128	36	14	58	3	482	55.3	9.45	4.86				0	14.61	0				34.02	7.84		37.52		0		3.09	17.01		2				1	5	1				8	5		8
FALSE	High	Master Protein	A0A088AW48	Proliferating cell nuclear antigen OS=Apis mellifera OX=7460 GN=mus209 PE=3 SV=1		0	FALSE	21.972	16	3	6	3	261	29.1	4.82	3.18													6.12		4.1					2													2
FALSE	High	Master Protein	A0A088A8H2	Proline dehydrogenase OS=Apis mellifera OX=7460 PE=3 SV=1		0	FALSE	218.603	69	29	277	29	516	59.6	8.69	40.16	77.3	52.43	20.22	9.8	38	97.97	35.96	5.37	0	24.7	26.82	27.09	65.11	1.64	58.71	75.53	52.33	31.78	21.66	9	17	16	12	3	10	21	10	3	1	7	7	12	11
FALSE	High	Master Protein	Q86MV4	Prophenoloxidase OS=Apis mellifera OX=7460 GN=PPO PE=2 SV=2		0	FALSE	52.421	25	12	29	12	693	80	6.76				25.66					0	2.36				3.8		4.71			6.8					12					1	3				1
FALSE	High	Master Protein	A0A088A859	Proteasome endopeptidase complex OS=Apis mellifera OX=7460 GN=Pros29 PE=3 SV=1		0	FALSE	22.682	9	3	11	3	622	70.8	6.24	5.78	3.49		2.68	3.15	4.16	4.42		2.23					3.19				4.01	4.06		1	1		1	1	1	2		1					1
FALSE	High	Master Protein	A0A088A379	Proteasome subunit alpha type OS=Apis mellifera OX=7460 GN=LOC410095 PE=3 SV=1		0	FALSE	36.233	30	6	18	6	249	28.1	8.46	2.51	3.08					8.41		2.53	1.86		2.26	0	13.62					0		1	1					4		1	1		1	2	5
FALSE	High	Master Protein	A0A088ATC7	Proteasome subunit alpha type OS=Apis mellifera OX=7460 GN=LOC552654 PE=3 SV=1		0	FALSE	49.936	44	8	15	8	276	30.9	6.18	1.7	2.59		1.31			0					0		30.04						1.46	1	1		1			1					1		6
FALSE	High	Master Protein	A0A088AQ82	Proteasome subunit alpha type OS=Apis mellifera OX=7460 GN=Pros25 PE=3 SV=1		0	FALSE	5.054	12	2	3	2	234	25.8	7.36		0					2.07							0								1					1							1
FALSE	High	Master Protein	A0A087ZZN8	Proteasome subunit alpha type OS=Apis mellifera OX=7460 GN=Prosalpha5 PE=3 SV=1		0	FALSE	10.214	13	2	4	2	242	26.7	4.92				0			2.01					0		3.51										1			1					1		1
FALSE	High	Master Protein	A0A088AP06	Proteasome subunit alpha type OS=Apis mellifera OX=7460 GN=Prosalpha7 PE=3 SV=1		0	FALSE	5.443	4	1	1	1	254	27.9	6.09														2.04																				1
FALSE	High	Master Protein	A0A088A1E9	Proteasome subunit beta OS=Apis mellifera OX=7460 GN=LOC408353 PE=3 SV=1		0	FALSE	7.445	7	1	1	1	277	30.3	7.42							3.54																				1
FALSE	High	Master Protein	A0A087ZWB2	Proteasome subunit beta OS=Apis mellifera OX=7460 GN=LOC409978 PE=3 SV=1		0	FALSE	10.717	21	4	13	4	207	23.6	6.92	2.19	5.45		0	2.04	2.13								4.83			2.09	2.05	2.16	1.99	1	2		1	1	1								2
FALSE	High	Master Protein	A0A087ZZ62	Proteasome subunit beta OS=Apis mellifera OX=7460 GN=LOC411206 PE=3 SV=1		0	FALSE	9.97	8	2	2	2	282	31.6	7.5		1.86												3.25								1												1
FALSE	High	Master Protein	A0A088AM79	Proteasome subunit beta OS=Apis mellifera OX=7460 GN=LOC411520 PE=3 SV=1		0	FALSE	12.907	18	3	3	3	267	30	7.84		1.68					3.6							0								1					1							1
FALSE	High	Master Protein	A0A087ZMT8	PROTEASOME_ALPHA_1 domain-containing protein OS=Apis mellifera OX=7460 PE=4 SV=1		0	FALSE	14.024	34	3	6	3	119	13.1	6.79				2.22			3.9							6.89					1.68					1			2							2
FALSE	High	Master Protein	A0A088A7Y2	Protein disulfide-isomerase OS=Apis mellifera OX=7460 GN=ERp60 PE=3 SV=1		0	FALSE	246.413	67	29	393	29	490	55.8	5.77	153.83	34.14	1.95	23.28	13.43	62.69	73	6.39	4.69	1.89	67.59	27.45	37.2	134.47		116.89	77.07	36.07	58.64	10.59	24	10	2	10	5	16	19	4	2	2	14	12	12	19
FALSE	High	Master Protein	A0A088A7L2	Protein disulfide-isomerase OS=Apis mellifera OX=7460 PE=3 SV=1		0	FALSE	187.587	65	30	228	30	496	56.2	5.12	30.95	33.95	0	19.43	6.84	13.97	86.52	4.03	8.99	2.05	23.2	29.24	20.12	62.74		59.82	30.7	22.13	37	5.91	10	12	1	13	3	8	22	4	4	1	7	13	7	13
FALSE	High	Master Protein	A0A088A8P9	Protein kinase C OS=Apis mellifera OX=7460 GN=aPKC PE=3 SV=1		0	FALSE	24.776	7	3	7	3	782	87.7	5.83	7.73						3.58							3.57		4.47		4.32	3.25		2						1							1
FALSE	High	Master Protein	A0A088A4Q2	Protein kinase domain-containing protein OS=Apis mellifera OX=7460 GN=CaMKI PE=3 SV=1		0	FALSE	20.185	17	4	4	4	374	41.9	6.55	3.98													8.96							1													3
FALSE	High	Master Protein	A0A087ZW71	Protein kinase domain-containing protein OS=Apis mellifera OX=7460 GN=CkIIalpha PE=3 SV=1		0	FALSE	66.535	22	9	57	9	468	55.6	8.56	13.52	3.97	0		12.98	6.63	9.59	2.23	5.13	4.62	10.23			26.44		12.07	5.67	11.31	17.67	5.99	3	2	1		3	2	3	1	2	2	3			4
FALSE	High	Master Protein	A0A088AFE4	Protein kinase domain-containing protein OS=Apis mellifera OX=7460 GN=Csnk1a1 PE=3 SV=1		0	FALSE	32.359	23	7	38	6	350	40.3	9.51	2.04	0	0	4.89	10.1	4.22	2.13	0	1.76	0	3.81			1.99	0	4.33	4.12	4.28		7.82	1	1	1	5	3	1	2	1	1	1	2			2
FALSE	High	Master Protein	A0A088AGR0	Protein kinase domain-containing protein OS=Apis mellifera OX=7460 GN=GckIII PE=4 SV=1		0	FALSE	8.842	5	2	2	2	680	76.3	8.35											2.74			2.13																	1			1
FALSE	High	Master Protein	A0A088AL91	Protein kinase domain-containing protein OS=Apis mellifera OX=7460 GN=Hr78 PE=3 SV=1		0.006	FALSE	3.218	2	1	1	1	420	48.2	8.28																			0
FALSE	High	Master Protein	A0A088A362	Protein kinase domain-containing protein OS=Apis mellifera OX=7460 GN=LOC408866 PE=4 SV=1		0	FALSE	11.305	7	2	2	2	522	59.7	9.13			2.25					3.53															1					1
FALSE	High	Master Protein	A0A087ZVX1	Protein kinase domain-containing protein OS=Apis mellifera OX=7460 GN=LOC410732 PE=4 SV=1		0	FALSE	6.869	3	1	1	1	599	68	6.6														2.34																				1
FALSE	High	Master Protein	A0A088AAV8	Protein kinase domain-containing protein OS=Apis mellifera OX=7460 GN=LOC413190 PE=4 SV=1		0	FALSE	8.063	5	2	5	2	703	79.7	6.57											1.88	0	0																		1	1	1
FALSE	High	Master Protein	A0A087ZZL2	Protein kinase domain-containing protein OS=Apis mellifera OX=7460 GN=LOC724672 PE=4 SV=1		0	FALSE	13.343	3	1	1	1	638	72.3	6.37														4.3																				1
FALSE	High	Master Protein	A0A088ATD3	Protein kinase domain-containing protein OS=Apis mellifera OX=7460 PE=3 SV=1		0	FALSE	60.073	37	10	65	9	410	46.4	8.51	17.53	2.51		2.98	10.06	7.45	2.49	1.79		4.61	8.49	1.96	2.08	23.58		21.21		6.7	16.88	10.1	3	2		2	4	3	1	2		3	3	1	2	5
FALSE	High	Master Protein	A0A088AV92	Protein kinase domain-containing protein OS=Apis mellifera OX=7460 PE=4 SV=1		0	FALSE	13.639	9	4	8	3	515	58.6	8.68		0		0	2.39		0							2.04	0		2.93					1		1	1		1							2
FALSE	High	Master Protein	A0A087ZP17	Protein kinase domain-containing protein OS=Apis mellifera OX=7460 PE=4 SV=1		0	FALSE	102.528	37	18	134	18	652	72	8.22	41.83	11.7	16.54	20.22	12.8	22.69	52.55	8.89	0	15.63	8.64	9.29		10.79		29.09	37.17	9.56	28.85	6.9	10	3	5	6	3	8	14	3	1	8	4	4		2
FALSE	High	Master Protein	A0A088AFF5	Protein kinase domain-containing protein OS=Apis mellifera OX=7460 PE=4 SV=1		0	FALSE	10.251	2	2	4	2	1634	187.9	7.81	0													2.15		2.17					1													1
FALSE	High	Master Protein	A0A088AQR5	Protein kinase domain-containing protein OS=Apis mellifera OX=7460 PE=4 SV=1		0.002	FALSE	4.506	3	1	1	1	315	36.4	6.47														2.59																				1
FALSE	High	Master Protein	A0A088AP50	Protein kinase domain-containing protein OS=Apis mellifera OX=7460 PE=4 SV=1		0	FALSE	57.716	17	5	51	5	512	58.4	9.06	22.3	0	8.3	5.94	0	20.4	2.06	7.96	1.84	4.28	2.85	2.86	0	6.33		12.14	2.47	7.19	10.72	0	3	1	4	4	1	3	2	3	2	2	1	1	1	2
FALSE	High	Master Protein	A0A088AQR4	Protein kinase domain-containing protein OS=Apis mellifera OX=7460 PE=4 SV=1		0	FALSE	7.774	4	1	2	1	239	26.7	5.07														6.83																				1
FALSE	High	Master Protein	A0A088AUS2	Protein kish OS=Apis mellifera OX=7460 GN=LOC725059 PE=3 SV=1		0.006	FALSE	3.439	14	1	2	1	74	8.4	9.22												2.44	2.22																			1	1
FALSE	High	Master Protein	A0A088AVD7	Protein lin-7 homolog OS=Apis mellifera OX=7460 GN=LOC552362 PE=3 SV=1		0	FALSE	20.227	25	4	6	4	198	21.8	8.15				0							4.38	2.35		5.82										1							2	1		2
FALSE	High	Master Protein	A0A088ACU6	Protein phosphatase methylesterase 1 OS=Apis mellifera OX=7460 GN=LOC550901 PE=3 SV=1		0.005	FALSE	3.88	3	1	2	1	384	41.9	7.25	0			0																	1			1
FALSE	High	Master Protein	A0A088ACJ9	Protein RER1 OS=Apis mellifera OX=7460 GN=LOC410094 PE=3 SV=1		0	FALSE	26.348	27	5	22	5	197	23.6	8.82	4.35	3.23	0				2.84				4.4	2.07	6.4	6.47		4.25	6.2	2.67	5.5		3	1	1				2				1	1	3	2
FALSE	High	Master Protein	A0A088AP14	Protein transport protein SEC23 OS=Apis mellifera OX=7460 GN=LOC408983 PE=3 SV=1		0	FALSE	76.871	22	11	30	11	775	86.5	7.01	44.73	0		1.8		2.81	2.69							2.16		33.64					8	1		1		1	1							1
FALSE	High	Master Protein	A0A088APZ1	Protein transport protein Sec61 subunit beta OS=Apis mellifera OX=7460 GN=Sec61beta PE=3 SV=1		0	FALSE	40.515	53	3	27	3	94	10	11	4.06	2.69	0	1.79	6.37	3.27	7.29	2.12			0			36.67		5.68	7.61	5.95	2.92	1.99	1	1	1	1	1	1	1	1			1			3
FALSE	High	Master Protein	A0A088AA80	Protein YIPF OS=Apis mellifera OX=7460 GN=102654121 PE=3 SV=1		0	FALSE	6.876	5	1	8	1	249	27.2	4.34	2.92		2.12	1.95			2.97				2.57			2.58		2.6	3.04				1		1	1			1				1			1
FALSE	High	Master Protein	A0A088A2J7	Protein YIPF OS=Apis mellifera OX=7460 GN=LOC413898 PE=3 SV=1		0	FALSE	9.019	9	1	1	1	228	25.7	5.38														3.38																				1
FALSE	High	Master Protein	A0A088AA34	Protein-serine/threonine kinase OS=Apis mellifera OX=7460 GN=Pdk PE=3 SV=1		0	FALSE	18.137	18	5	5	5	416	47.6	8													4.7																				5
FALSE	High	Master Protein	A0A088AVM2	Protein-tyrosine sulfotransferase OS=Apis mellifera OX=7460 GN=Tango13 PE=3 SV=1		0	FALSE	19.988	17	4	16	4	380	43.1	8.85	8.38		1.66		2.54	2.51		7.86								2.25	1.99				3		1		1	1		4
FALSE	High	Master Protein	A0A087ZXB2	Protoporphyrinogen oxidase OS=Apis mellifera OX=7460 GN=Ppox PE=3 SV=1		0	FALSE	88.955	44	15	124	15	477	53.3	9	31.57	7.02	4.98	12.41		15.15	15.96	20.6	4.85		12.55	5.11	6.88	14.82	1.84	24.63	20.29	30.74	8.2	7.66	11	4	3	5		8	9	9	5		4	4	6	4
FALSE	High	Master Protein	A0A088A0F6	PSP domain-containing protein OS=Apis mellifera OX=7460 GN=LOC726336 PE=4 SV=1		0.002	FALSE	4.373	2	1	2	1	728	80.7	5.82	2.81															2.82					1
FALSE	High	Master Protein	A0A2H4MCS2	Pterin-4-alpha-carbinolamine dehydratase (Fragment) OS=Apis mellifera OX=7460 GN=PCD PE=2 SV=1		0	FALSE	10.625	32	3	6	3	117	13.8	9.14		1.97		1.82			4.66					1.91	0									1		1			2					1	1
FALSE	High	Master Protein	A0A088AP40	P-type domain-containing protein OS=Apis mellifera OX=7460 PE=3 SV=1		0	FALSE	6.654	4	2	2	2	907	105.2	7.52	0												0								1												1
FALSE	High	Master Protein	A0A087ZR59	PUA domain-containing protein OS=Apis mellifera OX=7460 GN=LOC413805 PE=4 SV=1		0	FALSE	13.338	9	4	10	4	517	58.5	9.1		4.49			3.43		0	2.55									3.76					2			2		2	3
FALSE	High	Master Protein	A0A088AGW6	PUA domain-containing protein OS=Apis mellifera OX=7460 GN=LOC726009 PE=4 SV=1		0	FALSE	11.85	27	4	9	4	182	20.4	9.23	1.61					1.66			2.13				1.76	1.89		3.57			0		1					1			1				2	1
FALSE	High	Master Protein	V5I100	Putative 60s ribosomal protein l23 apis mellifera (Fragment) OS=Ixodes ricinus OX=34613 PE=2 SV=1		0	FALSE	41.281	46	6	114	1	136	14.2	10.29	34.12	11.14	11.65	17.12	19.19	10.67	17.24	11.74	13.17	8.14	7.55	9.92	3.31	75.79	7.94	19.57	14.9	17.77	17.01	11.78	4	3	2	4	5	3	3	2	2	2	2	2	1	3
FALSE	High	Master Protein	A0A087ZS28	Putative ATP-dependent RNA helicase DDX46-like protein OS=Apis mellifera OX=7460 GN=LOC727008 PE=4 SV=1		0	FALSE	15.44	3	2	11	2	1030	116	8.84	5.32			0		2.07	1.76	1.78	2.17	0				5.12				2.24			1			1		1	1	1	1	1				1
FALSE	High	Master Protein	Q9NAS6	Putative cAMP-dependent protein kinase catalytic subunit OS=Apis mellifera carnica OX=88217 GN=co PE=2 SV=1		0	FALSE	7.24	7	2	5	2	353	40.6	8.81		1.61		0					0				2.01				2.21					1		1					1				1
FALSE	High	Master Protein	A0A222LPT2	Putative cyclin-dependent serine/threonine-protein kinase OS=Apis mellifera OX=7460 PE=2 SV=1		0	FALSE	135.984	18	15	81	15	1511	175.7	5.25					70.93	12.3		4.14	2.32	26.9				4.01	14.47				22.08	54.98					11	5		3	2	9				1
FALSE	High	Master Protein	M9T1J1	Putative elongation factor Tu (Fragment) OS=Lactobacillus apis OX=303541 GN=tuf PE=4 SV=1		0	FALSE	38.182	44	7	26	5	246	27.1	4.89			13.89	0				20.25	1.93				5.92			1.9			5.04	1.92			4	1				6	1				2
FALSE	High	Master Protein	A0A088A0Q2	Putative GTP cyclohydrolase 1 type 2 OS=Apis mellifera OX=7460 PE=4 SV=1		0	FALSE	24.761	21	4	8	4	274	30.4	6.68						2.29						2.63	7.35	2.58				2.09	0							1						1	3	1
FALSE	High	Master Protein	A0A088A8F0	Putative H3K9 methyltransferase OS=Apis mellifera OX=7460 PE=4 SV=1		0	FALSE	18.846	6	5	13	4	1026	115.7	8.27	6.72	2.11		1.74	1.56	1.76		1.54	2.79				0	4.74							2	1		1	1	1		1	1				1	2
FALSE	High	Master Protein	A0A087ZTR2	PWWP domain-containing protein OS=Apis mellifera OX=7460 GN=LOC552332 PE=4 SV=1		0	FALSE	14.865	8	3	5	3	549	62.1	8.07	0	0												4.03							1	1												1
FALSE	High	Master Protein	A0A088AUI8	PWWP domain-containing protein OS=Apis mellifera OX=7460 PE=4 SV=1		0	FALSE	34.573	26	7	42	7	303	34	9.48	12.17	17.88		7.56	2.39	4.18	15.84	1.96		3.92				3.64		7.72	5.46	7.23	6.23	5.37	4	6		4	1	2	5	1		2				1
FALSE	High	Master Protein	A0A088AL66	PX domain-containing protein OS=Apis mellifera OX=7460 PE=4 SV=1		0	FALSE	45.22	25	9	24	9	510	57.7	5.27	10.61			1.6						0	5.62	3.54	1.86	15.25		1.91					4			2						1	3	2	3	5
FALSE	High	Master Protein	A0A088AC70	Pyr_redox_2 domain-containing protein OS=Apis mellifera OX=7460 PE=4 SV=1		0	FALSE	271.217	70	30	655	30	469	53.3	9.1	139.55	105.96	109.41	67.27	31.02	84.26	180.04	118.69	49.11	5.6	102.65	40.88	67.27	132.04	2.33	97.41	134.06	130.72	102.62	63.83	18	17	21	13	8	14	24	17	12	3	10	14	15	11
FALSE	High	Master Protein	A0A088AER7	Pyridoxal phosphate homeostasis protein OS=Apis mellifera OX=7460 GN=LOC551119 PE=3 SV=1		0.01	FALSE	2.867	5	1	1	1	248	28.3	7.72																				0
FALSE	High	Master Protein	A0A088A902	Pyrroline-5-carboxylate reductase OS=Apis mellifera OX=7460 GN=LOC408859 PE=3 SV=1		0	FALSE	40.468	39	7	38	7	270	28.5	8.12	14.13				6.42	8.94		12.92								11.8		19.13	8.2	2.84	4				3	3		6
FALSE	High	Master Protein	A0A087ZNH6	Pyruvate carboxylase OS=Apis mellifera OX=7460 GN=LOC412876 PE=4 SV=1		0	FALSE	463.933	57	49	651	49	1196	131.8	6.99	264.4	68.93	19.28	18.23	18.89	167.54	115.53	103.64	33.89	6.48	46.77	33.8	40.3	119.37	0	202.46	113.57	155.32	123.08	41.77	40	21	12	12	8	34	25	27	14	5	15	14	14	26
FALSE	High	Master Protein	A0A0G3SPY1	Pyruvate dehydrogenase E1 component OS=Serratia marcescens OX=615 GN=aceE_3 PE=4 SV=1		0.005	FALSE	3.52	1	1	1	1	887	99.5	5.69			0																				1
FALSE	High	Master Protein	A0A088AA89	Pyruvate dehydrogenase E1 component subunit alpha OS=Apis mellifera OX=7460 GN=LOC551103 PE=4 SV=1		0	FALSE	246.698	61	24	557	24	402	44.5	7.88	169.5	53.99	50.11	56.9	85.42	105.78	65.94	71.18	27.24	43.41	53.17	27.29	28.54	111.77	12.51	156.14	88.94	134.83	116.44	48.08	20	11	13	13	14	15	14	15	9	11	13	7	10	15
FALSE	High	Master Protein	A0A088AUU5	Pyruvate dehydrogenase E1 component subunit beta OS=Apis mellifera OX=7460 PE=4 SV=1		0	FALSE	220.335	69	17	549	17	335	36.3	5.44	174.1	38.7	39.78	45.53	83.6	130.79	78.05	62.55	21.51	52.64	61.83	75.37	93.36	205.93	13.27	146.8	93.49	111.44	132.06	59.57	15	9	10	8	11	14	11	10	6	11	12	10	11	11
FALSE	High	Master Protein	A0A088A5I8	Pyruvate kinase OS=Apis mellifera OX=7460 PE=3 SV=1		0	FALSE	444.964	65	31	834	31	609	66.5	7.31	358.43	76.95	2.29	90.16	34.83	186.53	94.69	53.13	112.95	40.4	194.86	113.25	141.91	280.7		314.4	94.93	44.36	248.23	24	26	17	1	19	9	23	19	15	18	12	17	22	20	23
FALSE	High	Master Protein	V5T8R7	Pyruvate oxidase OS=Lactobacillus helsingborgensis OX=1218494 GN=JF73_16910 PE=3 SV=1		0	FALSE	6.982	5	3	4	3	604	67	4.86								2					6.03															1					3
FALSE	High	Master Protein	V5T8W4	Pyruvate/2-oxoglutarate dehydrogenase complex dehydrogenase component OS=Lactobacillus mellis OX=1218508 PE=4 SV=1		0	FALSE	6.452	6	1	2	1	336	36.9	5.15								0																				1
FALSE	High	Master Protein	A0A088AUN5	Rab GDP dissociation inhibitor OS=Apis mellifera OX=7460 GN=Gdi PE=3 SV=1		0	FALSE	68.198	48	13	44	13	442	49.8	5.58	11.56	1.66		6.2	7.07	9.96	5.83	0		1.89	2.1	0	4.17	5.34		26.59	0		10.5		3	3		5	3	3	3	2		1	1	1	3	3
FALSE	High	Master Protein	A0A087ZUJ9	Rab proteins geranylgeranyltransferase component A OS=Apis mellifera OX=7460 PE=3 SV=1		0	FALSE	25.231	9	3	10	3	511	57.9	4.84	7.9													2.18		4.9					2													1
FALSE	High	Master Protein	A0A088A8F1	Rab-GAP TBC domain-containing protein OS=Apis mellifera OX=7460 GN=RabGAP7 PE=4 SV=1		0.005	FALSE	3.774	3	1	13	1	357	41.6	8.34	3.97	0	0		1.76	1.72	0									1.85	2.17	2.62		1.92	1	1	1		1	1	1
FALSE	High	Master Protein	A0A088A9V7	RanGAP1_C domain-containing protein OS=Apis mellifera OX=7460 GN=LOC411909 PE=4 SV=1		0	FALSE	8.534	6	3	8	3	598	65.7	4.88	4.76					2.04										6.86			2.28		1					1
FALSE	High	Master Protein	A0A087ZNU6	RBD domain-containing protein OS=Apis mellifera OX=7460 GN=409616 PE=4 SV=1		0	FALSE	9.79	2	2	9	2	1641	183.8	8.46	3.2					2.85		0		2.06				0		3.29		3.66		0	1					1		1		1				1
FALSE	High	Master Protein	A0A087ZTL5	Receptor expression-enhancing protein OS=Apis mellifera OX=7460 GN=LOC551678 PE=3 SV=1		0	FALSE	29.047	29	4	74	4	178	20.8	8.28	6.5	10.91	5.46	6.9	11.56	8.48	14	3.06	4.96		12.21	11.64	5.24	13.72	1.78	10.38	12.19	11.11	14.06	2.63	3	3	1	2	2	3	3	1	1		3	2	1	2
FALSE	High	Master Protein	A0A087ZVF3	Reticulon-like protein OS=Apis mellifera OX=7460 GN=102656074 PE=4 SV=1		0	FALSE	80.026	29	4	200	4	210	23.4	8.25	58.27	24.1	12.09	15.95	41.06	29.45	50.95	14.34	25.28	9.27	27.6	137.81	161.96	54.56	4.32	36.25	42.04	25.29	39.79	13.65	3	2	3	3	3	4	4	3	4	2	4	4	4	4
FALSE	High	Master Protein	A0A087ZVF0	Reticulon-like protein OS=Apis mellifera OX=7460 PE=4 SV=1		0	FALSE	50.125	36	11	26	11	244	28.2	4.67		2.01					3.86				14.46	2.67	6.29	15.85			2.54		0			1					3				6	3	3	6
FALSE	High	Master Protein	A0A087ZYK5	RF_PROK_I domain-containing protein OS=Apis mellifera OX=7460 GN=LOC410376 PE=4 SV=1		0	FALSE	14.358	25	5	16	5	198	23	9.86	3.08		2.1			1.61	2.15	2.41			1.86		2.55	2.88		2.27	2.08	0	0		2		2			1	1	1			1		1	1
FALSE	High	Master Protein	Q38SD4	Rh-like protein OS=Apis mellifera OX=7460 PE=2 SV=1		0	FALSE	70.809	30	9	86	7	471	51.5	6.58	38.45	12.25	8.23	5.77	0	7.7	34.95	0			9.16	2		24.04	2.71	2.25	20.76		12.81		5	5	5	1	1	3	5	1			4	1		4
FALSE	High	Master Protein	A0A088AQW4	Ribonucloprotein OS=Apis mellifera OX=7460 GN=102655272 PE=3 SV=1		0	FALSE	7.096	31	2	7	2	127	13.9	7.85		2.64		2.23			2.23		2.97	2.9		0										1		1			1		1	1		1
FALSE	High	Master Protein	A0A088AFB1	Ribos_L4_asso_C domain-containing protein OS=Apis mellifera OX=7460 GN=RpL4 PE=4 SV=1		0	FALSE	165.952	49	21	432	21	429	48.3	11.53	97.49	68.74	8.55	33.24	66.94	59.22	97.93	43.55	13.01	45.37	35.83	17.96	6.72	77.6	5.14	77.58	92.58	73.82	57.7	59.06	17	14	7	11	13	13	16	11	6	10	11	8	4	13
FALSE	High	Master Protein	A0A087ZZ05	Ribosomal protein L15 OS=Apis mellifera OX=7460 GN=RpL15 PE=3 SV=1		0	FALSE	51.417	34	8	132	8	204	23.9	11.6	35.38	26.55	9.39	9.86	25.63	16.67	20.29	22.81	4.59	14.08		1.95	1.62	14.82		19.93	24.09	15.27	8.09	19.03	6	4	3	3	3	4	5	6	3	3		1	1	3
FALSE	High	Master Protein	X2JFT9	Ribosomal protein L19 OS=Apis mellifera OX=7460 GN=rpl19 PE=2 SV=1		0	FALSE	68.326	36	9	149	9	200	23.6	11.22	27.66	23.67	7.01	14.45	21.25	20.32	23.06	13.3	5.35	13.94	18.06	9.03	0	34.56	1.85	29.75	25.16	17.51	24.43	21.65	6	5	3	4	4	6	6	5	4	4	3	4	3	6
FALSE	High	Master Protein	A0A087ZP25	Ribosomal protein L37 OS=Apis mellifera OX=7460 GN=RpL37 PE=3 SV=1		0.006	FALSE	3.392	12	1	5	1	91	10.7	11.56	0	0	0													0					1	1	1
FALSE	High	Master Protein	A0A088A6F6	Ribosomal protein S6 kinase OS=Apis mellifera OX=7460 GN=412419 PE=3 SV=1		0.007	FALSE	3.146	5	1	1	1	456	51.6	6.18					0																				1
FALSE	High	Master Protein	A0A088AA42	Ribosomal_L16 domain-containing protein OS=Apis mellifera OX=7460 GN=mRpL16 PE=4 SV=1		0	FALSE	15.08	18	4	18	4	240	28.1	10.02	5.83	3.04				5.17	5.11	4.36	0			0	0			5.69	4.02	5.5			2	1				2	2	2	1			1	1
FALSE	High	Master Protein	A0A087ZQ36	Ribosomal_L16 domain-containing protein OS=Apis mellifera OX=7460 GN=RpL10 PE=4 SV=1		0	FALSE	71.658	50	11	159	11	219	25	10.02	53.99	12	0	0	23.72	27.9	39.24	15.97	0	10.56	7.16	6.41	4.44	14.78	6.84	44.75	31.73	27.39	27.93	21.65	8	3	1	1	6	7	6	6	1	5	2	3	2	7
FALSE	High	Master Protein	A0A088AL09	Ribosomal_L18_c domain-containing protein OS=Apis mellifera OX=7460 GN=RpL5 PE=3 SV=1		0	FALSE	111.443	55	14	200	14	298	34.3	9.69	54.27	35.51	13.47	21.4	49.65	28.61	45.87	8.97	4.74	32.51	21.97	7.17	2.39	41.71	2.4	46.13	37.11	18.65	28.46	30.46	9	8	3	7	10	7	9	2	1	8	5	4	2	7
FALSE	High	Master Protein	A0A088A2E6	Ribosomal_L18e/L15P domain-containing protein OS=Apis mellifera OX=7460 GN=mRpL15 PE=3 SV=1		0	FALSE	39.26	35	8	48	8	293	33.7	9.07	7.08	2.05		1.95	5.05	7.11	7.42	0		2.03	5.97	2.53	5.41	5.22	0	5.54	7.58	8.5	5.18	0	3	1		1	2	3	3	1		1	2	1	4	3
FALSE	High	Master Protein	A0A088AIL2	Ribosomal_L18e/L15P domain-containing protein OS=Apis mellifera OX=7460 GN=RpL27A PE=3 SV=1		0	FALSE	58.571	32	8	111	8	147	16.7	10.54	31.33	17.16	2.03	0	16.42	17.73	31.45	8.47	7.49	3.2	3.42	4.76	2.14	20.48	0	26.54	25.11	14.73	16.82	20.81	5	3	1	1	4	4	5	2	2	1	2	4	2	2
FALSE	High	Master Protein	A0A088AGE9	Ribosomal_L2_C domain-containing protein OS=Apis mellifera OX=7460 GN=mRpL2 PE=4 SV=1		0	FALSE	9.759	14	3	5	3	310	34.5	10.02											3.7		2.36	0																	1		3	1
FALSE	High	Master Protein	A0A088ABL2	Ribosomal_L2_C domain-containing protein OS=Apis mellifera OX=7460 GN=RpL8 PE=3 SV=1		0	FALSE	113.558	49	11	153	11	257	28.1	10.92	35.62	18.34	2.49	5.79	20.23	30.18	53.15	4.16	2.47	13.19	9.83	3.15		40.58	2.17	30.19	50.53	21.84	17.83	23.64	6	6	1	3	5	7	8	2	1	4	3	2		9
FALSE	High	Master Protein	A0A088AJK1	Ribosomal_L23eN domain-containing protein OS=Apis mellifera OX=7460 GN=RpL23A PE=3 SV=1		0	FALSE	65.289	39	11	130	11	241	26.6	10.73	35.26	18.28	3.67	7.59	8.51	17.35	19.34	6.8	4.15	7.79	8.89	12.55	4.34	26.08	1.74	17.6	19.33	11.41	10.1	4.7	7	5	2	4	4	7	7	4	2	4	3	5	2	5
FALSE	High	Master Protein	A0A088ALQ3	Ribosomal_L28e domain-containing protein OS=Apis mellifera OX=7460 GN=RpL28 PE=4 SV=1		0	FALSE	48.754	39	6	70	6	138	15.7	11.31	29.11	11.14	2.02	6.25	6.48	4.08	13.66	9.68	1.86	0	2.11	1.8		5.6	2.22	17.11	6.87	8.8	4.05	12.55	5	3	3	4	3	2	4	3	1	1	1	1		2
FALSE	High	Master Protein	A0A088AW92	Ribosomal_L30 domain-containing protein OS=Apis mellifera OX=7460 GN=mRpL30 PE=4 SV=1		0	FALSE	7.33	14	2	3	2	177	20.7	9.8	2.7						0					0									1						1					1
FALSE	High	Master Protein	A0A088A8Q3	Ribosomal_L6e_N domain-containing protein OS=Apis mellifera OX=7460 GN=RpL6 PE=4 SV=1		0	FALSE	134.21	48	18	249	18	274	31.8	10.48	68.59	32.56	6.34	9.33	27.07	34.13	51.9	13.18	11.2	12.1	16.24	14.29	7.78	41.2	0	56.59	60.18	48.2	41.92	37.26	11	9	7	5	8	9	12	6	3	5	4	4	3	6
FALSE	High	Master Protein	A0A088AHA4	Ribosomal_L7Ae domain-containing protein OS=Apis mellifera OX=7460 GN=RpL30 PE=3 SV=1		0	FALSE	53.997	57	6	56	6	114	12.5	9.83	15.56	19.92		5.77	8.96	7.56	29.13	8.84	6.76			8.37	2.48	11.23	2.55	5.43	18.46	8.86	3.47	7.79	3	3		1	2	2	4	3	2			2	1	3
FALSE	High	Master Protein	A0A088A266	Ribosomal_L7Ae domain-containing protein OS=Apis mellifera OX=7460 GN=RpL7A PE=4 SV=1		0	FALSE	90.132	56	16	159	16	268	30.4	10.61	23.33	24.68	3.87	9.54	8.09	17.88	28.86	9.26	2.27	2.02	30.5	18.84	7.93	59.96	2.61	29.7	21.8	10.38	16.78	12.91	8	7	2	5	4	8	11	4	1	5	7	6	3	11
FALSE	High	Master Protein	A0A088ADB0	Ribosomal_L7Ae domain-containing protein OS=Apis mellifera OX=7460 PE=4 SV=1		0.006	FALSE	3.475	7	1	1	1	150	17.1	8.57														2.78																				1
FALSE	High	Master Protein	A0A088AB54	RIBOSOMAL_L9 domain-containing protein OS=Apis mellifera OX=7460 GN=LOC725866 PE=4 SV=1		0	FALSE	9.878	12	3	7	3	271	31.9	9.47		0						0				1.83	1.68	1.62								1						1				1	3	1
FALSE	High	Master Protein	A0A087ZVW5	Ribosomal_S10 domain-containing protein OS=Apis mellifera OX=7460 GN=LOC409129 PE=4 SV=1		0	FALSE	12.2	11	2	3	2	214	24.7	7.61													0	5.62																			1	2
FALSE	High	Master Protein	A0A087ZP66	Ribosomal_S10 domain-containing protein OS=Apis mellifera OX=7460 GN=mRpL48 PE=4 SV=1		0	FALSE	12.278	30	3	5	3	175	20.7	9.06		0	0													2.95	2.87	4.7				1	1
FALSE	High	Master Protein	A0A087ZP70	Ribosomal_S10 domain-containing protein OS=Apis mellifera OX=7460 GN=RpS20 PE=3 SV=1		0	FALSE	52.534	33	4	136	4	121	13.7	9.94	25.19	15.84	23.12	24.45	23.82	14.56	20.16	18.26	29.95	29.04	20.86	12.2	11.23	33.49	12.25	14.26	12.46	13.26	15.26	15.92	3	2	3	4	4	1	3	3	4	4	3	2	2	3
FALSE	High	Master Protein	A0A088A667	Ribosomal_S10 domain-containing protein OS=Apis mellifera OX=7460 PE=3 SV=1		0	FALSE	20.705	38	4	6	4	103	11.9	9.7																6.42			11.62
FALSE	High	Master Protein	A0A087ZQ43	Ribosomal_S13_N domain-containing protein OS=Apis mellifera OX=7460 GN=RpS13 PE=3 SV=1		0	FALSE	48.691	43	7	196	7	151	17.2	10.36	35.09	11.18	7.95	16.06	16.08	21.16	22.25	20.63	19.41	16.85	6.19	8.32	5.34	21.77	5.39	35.93	19.7	25.9	36.93	24.07	5	4	3	5	4	6	5	5	4	5	2	3	2	5
FALSE	High	Master Protein	A0A088A637	Ribosomal_S17_N domain-containing protein OS=Apis mellifera OX=7460 GN=RpS11 PE=3 SV=1		0	FALSE	49.031	47	8	114	8	155	18.1	10.93	26.52	15.71	3.13	1.61	16.96	22.88	21.76	9.09	7.75	2.29	7.16	3.15	1.73	17.73	1.78	24.83	21.8	13.73	17.37	14.72	6	5	2	1	5	7	6	3	3	1	3	2	2	5
FALSE	High	Master Protein	A0A088AEQ9	Ribosomal_S7 domain-containing protein OS=Apis mellifera OX=7460 GN=mRpS7 PE=3 SV=1		0	FALSE	25.318	28	6	25	6	227	26.8	9.69	6.55	0		0	0	2.37	2.1	2.37			1.87		2.4	2.74		7.29	4.97	5.11			2	1		1	1	2	2	1			1		2	2
FALSE	High	Master Protein	A0A088A389	Ribosomal_S7 domain-containing protein OS=Apis mellifera OX=7460 GN=RpS5a PE=3 SV=1		0	FALSE	115.192	53	13	266	13	216	24.1	9.45	55.88	30.64	22.25	30.48	34.94	37	37.56	26.69	35.43	24.63	18	20.59	7.14	81.51	12.54	53.23	41.55	39.9	29.05	33.23	8	6	6	8	6	9	7	6	8	6	5	5	4	9
FALSE	High	Master Protein	A0A088A2L6	RIC3 domain-containing protein OS=Apis mellifera OX=7460 PE=4 SV=1		0	FALSE	6.843	2	1	3	1	718	81.5	5.24		2.72			3.86												3.83					1			1
FALSE	High	Master Protein	A0A088ACS4	Rieske domain-containing protein OS=Apis mellifera OX=7460 PE=4 SV=1		0	FALSE	30.597	14	5	29	5	586	65.6	7.55	2.07				12.96	0	0							2.3		1.67		8.24	0	5.83	2				4	1	1							1
FALSE	High	Master Protein	A0A088AVT4	RING-type domain-containing protein OS=Apis mellifera OX=7460 GN=LOC408751 PE=4 SV=1		0	FALSE	25.573	12	1	2	1	182	20.5	6.74														9.49																				1
FALSE	High	Master Protein	A0A088AC30	RING-type domain-containing protein OS=Apis mellifera OX=7460 GN=LOC410740 PE=4 SV=1		0	FALSE	6.341	4	1	3	1	338	39.3	8.03	4.45																	0			1
FALSE	High	Master Protein	A0A087ZTA3	RING-type domain-containing protein OS=Apis mellifera OX=7460 GN=LOC411081 PE=4 SV=1		0	FALSE	16.317	9	2	4	2	320	36.3	8.03													1.74	9.77																			1	2
FALSE	High	Master Protein	A0A088AFC8	RING-type domain-containing protein OS=Apis mellifera OX=7460 GN=Trc8 PE=4 SV=1		0	FALSE	6.005	2	1	4	1	661	75.8	7.03	2.65				1.71											2.01		1.97			1				1
FALSE	High	Master Protein	A0A087ZTK8	RNA_bind domain-containing protein OS=Apis mellifera OX=7460 PE=4 SV=1		0.009	FALSE	3.013	4	2	3	2	614	70.2	7.24	1.79															0					2
FALSE	High	Master Protein	A0A088ANL1	RNase III domain-containing protein OS=Apis mellifera OX=7460 GN=mRpL44 PE=4 SV=1		0	FALSE	17.671	10	2	30	2	313	35.6	8.72	13.57	3.34	5.27	2.65	8.05	8.83	7.99	6.07	4.47		0					8.59	6.43	7.63	8.2	5.23	1	1	1	1	1	1	1	1	1		1
FALSE	High	Master Protein	A0A088A9Z3	RPN13_C domain-containing protein OS=Apis mellifera OX=7460 GN=LOC413299 PE=4 SV=1		0	FALSE	68.683	36	8	36	8	399	43.2	5.63	30.88	8.69		6.08	1.65	5.41	7.57				3.35	2.57		21.94		8.73	4.35	3.86	4.36		6	4		3	1	3	3				1	2		4
FALSE	High	Master Protein	A0A088AIM4	RPN2_C domain-containing protein OS=Apis mellifera OX=7460 PE=4 SV=1		0	FALSE	38.14	24	6	22	6	364	40.8	6.33	8.85	2.75				3.13	3.05	2.81	2.55		5.54	2.78		14.2		2.35	5.96		5.89		4	1				1	1	1	1		2	2		3
FALSE	High	Master Protein	A0A088AHL4	RPOLD domain-containing protein OS=Apis mellifera OX=7460 GN=LOC552458 PE=4 SV=1		0	FALSE	7.537	5	1	1	1	276	31.6	4.97														3.24																				1
FALSE	High	Master Protein	A0A088AS20	RRF domain-containing protein OS=Apis mellifera OX=7460 PE=4 SV=1		0	FALSE	16.12	24	3	9	3	259	30.7	9.23	2.78					0					2.26		7.21	4.96		4.1					1					1					1		2	1
FALSE	High	Master Protein	A0A088A2F5	RRM domain-containing protein OS=Apis mellifera OX=7460 GN=100578161 PE=4 SV=1		0	FALSE	17.928	9	3	8	3	451	52.4	9.36	3.42				1.76	2.1				0				6.11							1				2	1				1				2
FALSE	High	Master Protein	A0A088A8P7	RRM domain-containing protein OS=Apis mellifera OX=7460 GN=413835 PE=4 SV=1		0	FALSE	27.003	26	5	21	5	193	22.5	11.5	4.72	2.43		1.8			4.66		2.18		2.21	6.05	1.83	11.84		2.43	1.88				3	2		1			3		1		1	3	1	2
FALSE	High	Master Protein	A0A088AKG6	RRM domain-containing protein OS=Apis mellifera OX=7460 GN=Imp PE=4 SV=1		0	FALSE	99.351	34	13	69	13	576	62.4	8.92	40.74	8.08		2.78	2.12	12.57	18.01			1.77	12.18	9.15	0	25.68		26.6	12.68	0	7.51	2.22	10	3		2	1	4	6			1	4	4	2	5
FALSE	High	Master Protein	A0A087ZY55	RRM domain-containing protein OS=Apis mellifera OX=7460 GN=LOC409065 PE=4 SV=1		0	FALSE	14.471	6	3	11	3	464	54.5	6.57	5.03			4.1						2.2						2.61			2.23	0	2			3						1
FALSE	High	Master Protein	A0A088A7J9	RRM domain-containing protein OS=Apis mellifera OX=7460 GN=LOC409486 PE=4 SV=1		0	FALSE	10.354	6	2	3	2	416	43.1	8.56	3.04						2.28							2.58							1						1							1
FALSE	High	Master Protein	A0A088ADR8	RRM domain-containing protein OS=Apis mellifera OX=7460 GN=LOC409560 PE=4 SV=1		0	FALSE	19.961	9	3	4	3	502	57.4	8.47												0		10.58																		1		3
FALSE	High	Master Protein	A0A088AM73	RRM domain-containing protein OS=Apis mellifera OX=7460 GN=LOC409862 PE=4 SV=1		0	FALSE	7.484	11	2	3	2	176	20.9	11.74	2.87										0			0							1										1			1
FALSE	High	Master Protein	A0A088AU35	RRM domain-containing protein OS=Apis mellifera OX=7460 GN=Neos PE=4 SV=1		0.009	FALSE	2.926	2	1	2	1	644	70.7	8.44	2.2															2.11					1
FALSE	High	Master Protein	A0A087ZZC6	RRM domain-containing protein OS=Apis mellifera OX=7460 GN=Pabp2 PE=4 SV=1		0	FALSE	17.321	14	2	9	2	228	25.7	5.97											6.49	3.37		9.99		2.88															2	2		2
FALSE	High	Master Protein	A0A088A1A3	RRM domain-containing protein OS=Apis mellifera OX=7460 GN=RnpS1 PE=4 SV=1		0	FALSE	9.936	6	1	1	1	326	37.2	11.63														3.77																				1
FALSE	High	Master Protein	A0A088AU60	RRM domain-containing protein OS=Apis mellifera OX=7460 GN=snRNP70K PE=4 SV=1		0	FALSE	5.109	5	1	1	1	434	52.3	9.74	3.16																				1
FALSE	High	Master Protein	A0A088A8G8	RRM domain-containing protein OS=Apis mellifera OX=7460 PE=4 SV=1		0	FALSE	13.287	7	2	7	2	486	55.9	10.96	7.56													3		3.98	3.09	2.04		2.48	2													1
FALSE	High	Master Protein	A0A088A1R1	RRM domain-containing protein OS=Apis mellifera OX=7460 PE=4 SV=1		0	FALSE	8.747	12	2	11	2	163	18.9	8.65	3.83	2.21					1.68					2.1	2.2	3.82		2.23	1.69				2	1					1					1	1	2
FALSE	High	Master Protein	A0A087ZY56	RRM domain-containing protein OS=Apis mellifera OX=7460 PE=4 SV=1		0	FALSE	60.036	34	7	30	7	282	29.5	6.52	12.96			7.42	2.6	6.41				2.3	3.82			20.09		16.84			10.42	0	3			4	1	2				1	2			5
FALSE	High	Master Protein	A0A088A1R3	RRM domain-containing protein OS=Apis mellifera OX=7460 PE=4 SV=1		0	FALSE	15.097	11	2	15	2	241	27.9	11.78	11.68	6.4			0	0					2.37			6.68		6.48					2	1			1	1					1			1
FALSE	High	Master Protein	A0A088ABX8	RRM domain-containing protein OS=Apis mellifera OX=7460 PE=4 SV=1		0	FALSE	22.271	13	5	23	5	484	56.7	5.57	3.73	2.17			4.5	2.88	4.17	0		1.83		0		9.33		2.37	5.58	5.79		2.1	1	1			3	1	1	2		2		1		2
FALSE	High	Master Protein	A0A088A412	RRM domain-containing protein OS=Apis mellifera OX=7460 PE=4 SV=1		0	FALSE	28.066	10	5	13	5	816	89.7	9.29	11.47	2.59					3.59						1.9	2.9		0	3.12	0			4	1					2						1	1
FALSE	High	Master Protein	A0A088AH65	RRM domain-containing protein OS=Apis mellifera OX=7460 PE=4 SV=1		0	FALSE	27.642	23	4	12	4	247	26.7	11.06	4.37					4.58					8.85	5.07		3.88		2.45	0				1					2					2	1		1
FALSE	High	Master Protein	A0A088ADR9	RRM domain-containing protein OS=Apis mellifera OX=7460 PE=4 SV=1		0	FALSE	22.566	25	3	8	3	178	19.7	9.23	2.3			0							2.45		0	9.27		1.76					1			1							1		1	3
FALSE	High	Master Protein	A0A087ZSJ5	RuvB-like helicase OS=Apis mellifera OX=7460 GN=pontin PE=3 SV=1		0	FALSE	39.438	20	6	10	6	456	50	6.76	6.01					2.73								13.01		5.09				0	2					1								4
FALSE	High	Master Protein	A0A088ARN2	RuvB-like helicase OS=Apis mellifera OX=7460 GN=Reptin PE=3 SV=1		0	FALSE	21.197	8	3	3	3	462	51.4	5.54														10.71																				3
FALSE	High	Master Protein	A0A088ANA3	S-(hydroxymethyl)glutathione dehydrogenase OS=Apis mellifera OX=7460 GN=Fdh PE=3 SV=1		0	FALSE	15.147	8	2	14	2	377	40.4	7.28	5.43	4.75		0		3.29	7.63						2.12			3.2	2.25		5.9		1	1		1		1	1						1
FALSE	High	Master Protein	A0A088AB73	S1 motif domain-containing protein OS=Apis mellifera OX=7460 PE=4 SV=1		0	FALSE	91.06	31	16	68	16	747	83.8	8.65	23.3	5.62	2.77		3.91	20.89	11.23	15.89	2.06	2.1	2.73		5.87	12.64	0	22.03	10.27	8.51	10.7	2.4	6	2	2		2	6	5	6	2	2	1		3	3
FALSE	High	Master Protein	A0A087ZNQ6	S1 motif domain-containing protein OS=Apis mellifera OX=7460 PE=4 SV=1		0	FALSE	5.673	6	1	1	1	282	31.6	4.75	3.2																				1
FALSE	High	Master Protein	A0A088AHT2	S10_plectin domain-containing protein OS=Apis mellifera OX=7460 GN=LOC409552 PE=4 SV=1		0	FALSE	84.128	47	8	328	8	159	17.9	9.83	59.68	38.54	30.18	96.46	63.89	41.1	59.64	60.02	50.4	58.32	14.75	36.93	0	32.97	16.57	57.06	53.9	37.23	44.29	73.67	7	7	6	7	7	7	7	7	5	7	5	5	1	5
FALSE	High	Master Protein	A0A088AC67	S4 RNA-binding domain-containing protein OS=Apis mellifera OX=7460 GN=RpS9 PE=3 SV=1		0	FALSE	73.499	53	15	332	15	193	22.5	10.74	61.43	34.48	19.79	30.83	35.67	35.15	49.12	29.93	26.14	7.71	20.63	25.71	11.75	57.72	5.14	49.59	33.6	38.33	42.84	32.78	13	11	9	11	10	10	14	9	10	4	8	8	6	11
FALSE	High	Master Protein	A0A087ZQV2	S5 DRBM domain-containing protein OS=Apis mellifera OX=7460 GN=RpS2 PE=3 SV=1		0	FALSE	189.207	60	18	384	18	280	30.3	10.13	117.88	56.99	17.06	32.74	49.41	62.64	84.45	30.85	24.21	28.67	6.66	13.54	13.22	63.42	8.85	87.2	83.01	61.94	57.94	50.17	16	12	5	11	11	15	15	9	7	9	4	7	5	7
FALSE	High	Master Protein	A0A087ZZ41	SAC domain-containing protein OS=Apis mellifera OX=7460 GN=Sac1 PE=4 SV=1		0	FALSE	13.548	8	4	8	4	584	67.3	8.57	2.59													3.57		6.02	1.99	0	0		1													2
FALSE	High	Master Protein	A0A088AL97	Sacchrp_dh_NADP domain-containing protein OS=Apis mellifera OX=7460 PE=4 SV=1		0	FALSE	223.918	74	25	449	25	422	47.4	8.37	110.02	77.13	26.65	30.27	58.03	44.61	114.98	19.45	17.33	1.68	12.69	15.01	39.25	99.58	0	102.5	105.6	59.33	85.92	20.84	14	18	10	16	14	10	19	10	7	2	7	6	8	13
FALSE	High	Master Protein	A0A088A327	SAM domain-containing protein OS=Apis mellifera OX=7460 GN=Stim PE=4 SV=1		0	FALSE	9.388	3	2	10	2	687	76.2	5.94		1.61	0	0		2.07	3.63					1.99		3.66		1.91	2.05					1	1	1		1	1					1		1
FALSE	High	Master Protein	A0A087ZTV1	SAM_Exu domain-containing protein OS=Apis mellifera OX=7460 GN=exu PE=4 SV=1		0	FALSE	52.801	32	8	16	8	406	45.6	8.75								3.38	5.16	2.13	2.02			13.65		11.31	0	4.54										1	2	1	1			3
FALSE	High	Master Protein	A0A088A156	SAM_MT_RSMB_NOP domain-containing protein OS=Apis mellifera OX=7460 GN=LOC410262 PE=3 SV=1		0.006	FALSE	3.183	2	1	3	1	607	69.3	7.99						0										2.3		1.66								1
FALSE	High	Master Protein	A0A088AK82	SAM-dependent MTase TRM10-type domain-containing protein OS=Apis mellifera OX=7460 PE=4 SV=1		0	FALSE	41.585	27	9	64	9	387	46.5	9.47	23.39	2.41	4.41	2.01	11.62	5.95	16.8	16.08	6.71	2.13		2.07	1.75	2.7		15.94	7.5	12.07	5.91	7.65	5	1	2	1	3	2	5	4	3	2		1	1	1
FALSE	High	Master Protein	A0A088A896	SAP domain-containing protein OS=Apis mellifera OX=7460 GN=LOC551151 PE=4 SV=1		0	FALSE	31.257	22	5	11	5	248	27.9	9.09				2.08	2.13					7.51	2.71	0		4.1						2.16				2	1					2	1	1		1
FALSE	High	Master Protein	A0A088A791	SCD domain-containing protein OS=Apis mellifera OX=7460 PE=4 SV=1		0.007	FALSE	3.171	1	1	2	1	1108	127.8	5.9	2.33															1.64					1
FALSE	High	Master Protein	A0A088AIP8	SCP2 domain-containing protein OS=Apis mellifera OX=7460 GN=LOC552717 PE=4 SV=1		0	FALSE	141.801	61	15	209	15	413	45.2	8.53	103.38	21.01	0	20.19	31.11	60.33	39.73	26.78	10.17	7.33	2.47	11.8	8.64	43.95		72.86	11.86	50.2	57.07	28.71	11	5	1	8	7	9	11	8	4	3	1	7	3	8
FALSE	High	Master Protein	A0A088AK33	Sec16_C domain-containing protein OS=Apis mellifera OX=7460 PE=4 SV=1		0	FALSE	5.975	1	1	4	1	2506	287.8	5.64	2.95				0											0		0			1				1
FALSE	High	Master Protein	A0A087ZN54	Secretory carrier-associated membrane protein OS=Apis mellifera OX=7460 GN=Scamp PE=3 SV=1		0	FALSE	55.905	16	3	10	3	354	39.4	7.25	9.9						3.6					3.6		21.74					3.98		1						1					1		3
FALSE	High	Master Protein	A0A088ATJ3	Sema domain-containing protein OS=Apis mellifera OX=7460 PE=4 SV=1		0	FALSE	9.303	2	2	13	2	1915	214.1	6.48	3.31	2.17	0		2.91	2.26	2.3		0		0					3.52	2.93	3.13	3.54	0	1	1	1		1	1	1		1		1
FALSE	High	Master Protein	A0A087ZRQ0	Septin-type G domain-containing protein OS=Apis mellifera OX=7460 GN=2-Sep PE=3 SV=1		0.003	FALSE	3.987	3	1	1	1	421	48.7	8.13														3.17																				1
FALSE	High	Master Protein	A0A087ZZQ8	Septin-type G domain-containing protein OS=Apis mellifera OX=7460 GN=pnut PE=3 SV=1		0	FALSE	12.386	4	3	3	3	712	79.2	8.62											0			4.71																	1			2
FALSE	High	Master Protein	A0A088AKH0	Septin-type G domain-containing protein OS=Apis mellifera OX=7460 PE=3 SV=1		0	FALSE	10.897	6	1	1	1	359	41	6.11														3.21																				1
FALSE	High	Master Protein	A0A088AQX9	Serine hydroxymethyltransferase OS=Apis mellifera OX=7460 GN=LOC411796 PE=3 SV=1		0	FALSE	43.896	27	9	23	9	522	58.6	8.72	7.86						11.97					0	1.63	2.38		13.38	5.42	1.78	3.8		3						5					1	1	1
FALSE	High	Master Protein	A0A087ZUP4	Serine/threonine protein phosphatase 2A regulatory subunit OS=Apis mellifera OX=7460 GN=LOC408949 PE=3 SV=1		0	FALSE	25.476	8	3	11	2	564	65.9	6.46	7.24					2.43							0	9.12		5.16			0		2					1							1	2
FALSE	High	Master Protein	A0A088AB82	Serine/threonine protein phosphatase 2A regulatory subunit OS=Apis mellifera OX=7460 PE=3 SV=1		0	FALSE	53.032	23	7	14	6	474	55.4	7.47	15.82								1.81			2.6		13.26		2.29			0		4								1			1		4
FALSE	High	Master Protein	A0A088AUP5	Serine/threonine-protein phosphatase OS=Apis mellifera OX=7460 GN=LOC409430 PE=3 SV=1		0	FALSE	48.723	37	7	23	5	329	37.4	6.76	16.94	4.26				7.89	2.02									19.14	2.46	2.46	5.39		4	3				3	1
FALSE	High	Master Protein	A0A087ZV34	Serine/threonine-protein phosphatase OS=Apis mellifera OX=7460 GN=LOC409804 PE=3 SV=1		0	FALSE	11.623	11	3	9	1	352	40.4	6.76	2.71	2.06				2.75										4.61	2.46	2.46	2.91		2	1				1
FALSE	High	Master Protein	A0A088ADM2	Serine/threonine-protein phosphatase OS=Apis mellifera OX=7460 GN=LOC411046 PE=3 SV=1		0	FALSE	31.833	9	8	21	8	1283	144.8	5.11	7.61			4.77		4.56					6.13					13.02			7.92		3			4		3					2
FALSE	High	Master Protein	A0A088A299	Serine/threonine-protein phosphatase OS=Apis mellifera OX=7460 GN=mts PE=3 SV=1		0	FALSE	30.751	22	4	13	4	309	35.4	5.53	17.11			0			2.07							7.66		7.43			2.36		4			1			1							1
FALSE	High	Master Protein	A0A088A573	Serine--pyruvate aminotransferase OS=Apis mellifera OX=7460 GN=LOC413678 PE=3 SV=1		0	FALSE	6.198	4	1	3	1	397	44.2	8.78	2.77								0									3.01			1								1
FALSE	High	Master Protein	I2CJE5	Serologically-defined colon cancer antigen 1-like protein (Fragment) OS=Apis mellifera OX=7460 GN=GB17050 PE=4 SV=1		0.004	FALSE	3.951	7	1	2	1	273	31.2	6.02	2.19																		2.08		1
FALSE	High	Master Protein	A0A088AS87	SERPIN domain-containing protein OS=Apis mellifera OX=7460 GN=100577408 PE=3 SV=1		0	FALSE	25.622	11	5	28	5	640	73.1	9.33		2.53		9.63	7.47	7.9	7.18			17.86							7.19		4.14	4.24		2		4	1	3	3			4
FALSE	High	Master Protein	A0A088ASF2	SERPIN domain-containing protein OS=Apis mellifera OX=7460 GN=serpin-5 PE=3 SV=1		0	FALSE	21.58	13	5	16	5	451	50.7	7.96	2.93			9.92						0	7.5	2.78	2.16			1.86	2.15	2.07		1.89	1			4						1	2	1	1
FALSE	High	Master Protein	A0A088ABM1	SERPIN domain-containing protein OS=Apis mellifera OX=7460 PE=3 SV=1		0	FALSE	28.731	25	6	15	6	342	38.6	6.43	10.84			10.1							2.06	2.09		3.25		2.83		3.33	0		3			5							1	1		1
FALSE	High	Master Protein	A0A087ZSJ2	SGL domain-containing protein OS=Apis mellifera OX=7460 PE=4 SV=1		0	FALSE	35.496	22	5	13	5	313	34.2	5.48	11.02			0	0									1.97		15.9			0		3			1	1									1
FALSE	High	Master Protein	A0A088ALL8	SH3 domain-containing protein OS=Apis mellifera OX=7460 GN=LOC408693 PE=4 SV=1		0	FALSE	118.056	29	20	48	20	878	99.8	6.09	25.14	2.38				5.12	3.04	4.41	4.07		11.08	8.07	1.84	18.67		8.74	10.35	4.21	0	0	8	3				2	2	2	2		5	4	1	5
FALSE	High	Master Protein	A0A088ATA9	SH3 domain-containing protein OS=Apis mellifera OX=7460 PE=4 SV=1		0	FALSE	8.353	10	2	3	2	256	28.1	5.5												1.84		5.59																		1		2
FALSE	High	Master Protein	A0A088A3R8	SHSP domain-containing protein OS=Apis mellifera OX=7460 GN=724449 PE=3 SV=1		0	FALSE	109.685	62	8	157	8	237	27.7	7.47	58.46	19	2.05	4.89	38.69	13.56	22.54	7.82	22.99	6.97	4.94	3.19	13.23	79.09	2.83	42.17	8.83	15.11	12.2	7.22	6	5	1	2	7	5	5	3	5	4	1	1	2	5
FALSE	High	Master Protein	A0A088APK1	SHSP domain-containing protein OS=Apis mellifera OX=7460 GN=LOC408875 PE=3 SV=1		0	FALSE	46.218	33	6	171	6	184	20.5	6.96	18.99	20.58	4.79	15.78	17.03	13.18	19.9	8.23	9.32	19.26	39.62	41.38	15.5	72.33	2.69	8.88	15	9.07	12.29	7.86	4	5	2	3	3	3	5	2	3	3	4	5	4	4
FALSE	High	Master Protein	A0A088AE90	SHSP domain-containing protein OS=Apis mellifera OX=7460 GN=LOC410857 PE=3 SV=1		0	FALSE	120.58	74	12	376	12	191	22	6.23	73.29	28.12	32.48	82.1	33.85	110.59	25.69	46.79	39.17	46.23	27.3	53.01	4.2	45.34	2.12	69.6	20.4	34.79	59.06	41.78	8	7	7	12	6	10	6	9	6	7	6	8	3	6
FALSE	High	Master Protein	A0A088A7Z5	SHSP domain-containing protein OS=Apis mellifera OX=7460 GN=LOC412197 PE=3 SV=1		0	FALSE	71.461	72	10	79	10	174	20.4	6.43	5.94	13.69		3.26	11.26	21.2	31.92	7.36	7.45	3.05	1.67	5.63	0	2.36	0	14.38	11.64	3.84	26.91	2.07	3	4		2	3	7	8	4	4	3	1	2	1	1
FALSE	High	Master Protein	A0A088A3R5	SHSP domain-containing protein OS=Apis mellifera OX=7460 GN=LOC724274 PE=3 SV=1		0	FALSE	114.574	64	12	200	12	194	22.5	6.24	48.74	63.02		4.96	7.86	25.2	97.52	14.92	4.54	0	17.86	8.03	2.88	70.52		52.68	35.99	22.19	36.59	7.8	7	9		4	2	5	12	7	2	1	4	3	2	9
FALSE	High	Master Protein	A0A088A3R7	SHSP domain-containing protein OS=Apis mellifera OX=7460 GN=LOC724405 PE=3 SV=1		0	FALSE	10.732	9	1	1	1	193	22.4	5.5														3.58																				1
FALSE	High	Master Protein	A0A088A3R9	SHSP domain-containing protein OS=Apis mellifera OX=7460 GN=LOC724488 PE=3 SV=1		0	FALSE	138.363	66	10	137	10	196	23	5.54	33.86	48.4		15.52	6.05	25.38	85.81	17		2.67	6.82	4.59		27.83		34.95	30.81	12.42	29.32	8.31	6	7		4	2	5	8	4		1	2	2		3
FALSE	High	Master Protein	A0A088A3R2	SHSP domain-containing protein OS=Apis mellifera OX=7460 PE=3 SV=1		0	FALSE	107.648	72	12	112	12	185	21.8	6.55	15.2	7.47	24.49	1.83		11.48	0	34.87	6.57	0	3.02			52.99		32.68		23.97	37.19		4	4	6	2		5	1	8	5	1	1			9
FALSE	High	Master Protein	A0A088A3R6	SHSP domain-containing protein OS=Apis mellifera OX=7460 PE=3 SV=1		0	FALSE	9.107	18	2	5	2	209	24.2	5.27	2.42						0									0		0			1						1
FALSE	High	Master Protein	A0A088A4I8	Sidoreflexin OS=Apis mellifera OX=7460 GN=LOC550915 PE=3 SV=1		0	FALSE	163.889	60	16	318	16	326	36.8	9.1	85.33	64.11	68.62	40.11	78.65	51.39	65.29	90.16	39.06	30.62	4.01	1.92	0	11.6	2.14	46.32	65.03	67.52	56.16	32.77	10	11	12	10	12	8	13	14	9	6	2	2	2	4
FALSE	High	Master Protein	A0A088A934	Signal peptidase complex catalytic subunit SEC11 OS=Apis mellifera OX=7460 GN=Spase18-21 PE=3 SV=1		0	FALSE	21.635	19	4	48	4	180	20.7	9.13	14.29	8.54	7.97	8.43	11.2	2.99	9.2	2.21	1.85		2.32	4.54	2.13	8.57	1.76	8.29	11.12	9.28	8.8	4.76	3	2	3	3	3	1	3	1	1		1	2	1	3
FALSE	High	Master Protein	A0A088AFN8	Signal recognition particle 54 kDa protein OS=Apis mellifera OX=7460 GN=LOC552114 PE=3 SV=1		0	FALSE	30.136	25	6	8	6	498	55	8.65	2.18							1.9						7.72		0		3.29			1							1						2
FALSE	High	Master Protein	A0A088AR84	Signal recognition particle subunit SRP68 OS=Apis mellifera OX=7460 GN=Srp68 PE=3 SV=1		0	FALSE	54.219	23	8	26	8	576	66.2	8.47	18.91	0		0	0	3.19			2.04		2.91			11.92		3.76	0	3.49	3.09	0	4	1		1	2	1			1		2			4
FALSE	High	Master Protein	A0A088A4L7	Signal recognition particle subunit SRP72 OS=Apis mellifera OX=7460 PE=3 SV=1		0	FALSE	50.43	17	8	15	8	630	71.4	8.7	11	5.52									1.69			13.22		0	2.15	0		0	3	2									1			4
FALSE	High	Master Protein	A0A088AEX7	Signal transducer and activator of transcription OS=Apis mellifera OX=7460 GN=STAT92E-like PE=3 SV=1		0	FALSE	29.977	12	6	34	6	824	92.8	6.79	16.45	0	0	0	5.8	6.2	3.25	5.18	0	2.33						24.31	2.63	8.16	8.89	9.76	4	1	1	1	1	1	1	2	1	1
FALSE	High	Master Protein	B6V6A0	Silk fibroin 1 OS=Apis mellifera OX=7460 GN=Fibroin1 PE=2 SV=1		0.007	FALSE	3.144	3	1	1	1	333	33.3	6.34																				2.24
FALSE	High	Master Protein	B6V6A1	Silk fibroin 2 OS=Apis mellifera OX=7460 GN=Fibroin2 PE=2 SV=1		0	FALSE	5.678	5	1	2	1	309	30.7	5.78																				2.05
FALSE	High	Master Protein	B6V6A2	Silk fibroin 3 OS=Apis mellifera OX=7460 GN=Fibroin3 PE=2 SV=1		0	FALSE	12.324	8	2	2	2	335	33.5	5.88																				6.55
FALSE	High	Master Protein	A0A1Q4P0U7	Single-stranded DNA-binding protein OS=Serratia marcescens OX=615 GN=BHU62_11030 PE=3 SV=1		0.002	FALSE	4.359	8	1	1	1	176	18.8	5.58			2.2																				1
FALSE	High	Master Protein	A0A088AN14	Skp1_POZ domain-containing protein OS=Apis mellifera OX=7460 GN=Elongin-C PE=3 SV=1		0	FALSE	24.889	28	4	4	4	145	16	4.51	5.69													6.97							2													2
FALSE	High	Master Protein	A0A088A041	Small nuclear ribonucleoprotein Sm D1 OS=Apis mellifera OX=7460 GN=LOC552559 PE=3 SV=1		0	FALSE	13.07	16	1	17	1	123	13.6	11.44	9.11				0	1.73	0			0						1.68		0	0	0	1				1	1	1			1
FALSE	High	Master Protein	A0A087ZMS5	Small nuclear ribonucleoprotein Sm D2 OS=Apis mellifera OX=7460 PE=3 SV=1		0	FALSE	7.283	9	1	4	1	110	12.5	9.99	2.77						2.17						0	1.93							1						1						1	1
FALSE	High	Master Protein	A0A087ZNX7	Small nuclear ribonucleoprotein Sm D3 OS=Apis mellifera OX=7460 GN=SmD3 PE=3 SV=1		0.005	FALSE	3.595	6	1	9	1	142	15.4	10.32					1.9	1.9		0		1.76						2.07	1.75	2.02	1.93	1.62					1	1		1		1
FALSE	High	Master Protein	A0A088A2F9	Small nuclear ribonucleoprotein-associated protein OS=Apis mellifera OX=7460 GN=Smb PE=3 SV=1		0.002	FALSE	4.212	4	1	16	1	217	22.7	11.08	2.4	3.85		4.25	2.58		2.62	2.35	2.24	4.1						1.81	1.87	2.15	1.64	0	1	1		1	1		1	1	1	1
FALSE	High	Master Protein	A0A088ACK1	Small ubiquitin-related modifier OS=Apis mellifera OX=7460 GN=LOC409308 PE=3 SV=1		0	FALSE	5.53	21	2	2	2	98	11.2	5.1											1.62					2.37															1
FALSE	High	Master Protein	H9KID5	Small ubiquitin-related modifier OS=Apis mellifera OX=7460 GN=smt3 PE=3 SV=1		0	FALSE	9.396	32	3	5	3	93	10.4	5.48	2.59								2.73			1.79				4.25					1								1			1
FALSE	High	Master Protein	A0A087ZZ04	SMB domain-containing protein OS=Apis mellifera OX=7460 GN=LOC409789 PE=3 SV=1		0	FALSE	381.943	68	31	1403	31	439	50.2	7.31	195.85	144.56	125.97	108.75	270.38	165.88	149.64	197.39	299.24	230.34	67.06	98.86	74.82	287.62	59.66	171.39	186.89	244.99	195.99	226.27	21	22	23	21	24	25	22	25	26	25	11	13	11	20
FALSE	High	Master Protein	A0A088A605	S-methyl-5'-thioadenosine phosphorylase OS=Apis mellifera OX=7460 GN=LOC552740 PE=3 SV=1		0	FALSE	7.226	13	2	5	2	285	31.5	7.2				1.95			1.99		2.01										0					1			1		2
FALSE	High	Master Protein	A0A088A0G6	SMK-1 domain-containing protein OS=Apis mellifera OX=7460 GN=flfl PE=4 SV=1		0	FALSE	12.389	6	3	4	3	812	92.7	4.94	2.97						1.72							2.64							2						1							1
FALSE	High	Master Protein	A0A087ZPA7	Sodium/hydrogen exchanger OS=Apis mellifera OX=7460 PE=3 SV=1		0.002	FALSE	4.192	2	1	1	1	678	75.8	6.71	0																				1
FALSE	High	Master Protein	A0A088AMA0	Sodium/nucleoside cotransporter OS=Apis mellifera OX=7460 GN=LOC410532 PE=3 SV=1		0.009	FALSE	2.938	2	1	2	1	588	65.5	8.21								1.6						1.64														1						1
FALSE	High	Master Protein	A0A087ZTA6	Sodium/potassium-transporting ATPase subunit alpha OS=Apis mellifera OX=7460 PE=3 SV=1		0	FALSE	562.67	63	59	1385	59	1035	115.2	5.81	164.03	230.44	136.2	48.67	107.47	121.13	265.79	97.07	35.04	45.5	117.4	81.58	1275.71	206.87	15.92	102.14	184.41	160.44	103.79	57.27	34	41	36	18	23	29	45	28	14	20	23	25	44	34
FALSE	High	Master Protein	A0A088AHB9	Solute carrier organic anion transporter family member OS=Apis mellifera OX=7460 GN=LOC409649 PE=3 SV=1		0	FALSE	15.707	6	3	3	3	696	77	7.94														3.94				5.81																1
FALSE	High	Master Protein	A0A088AHC0	Solute carrier organic anion transporter family member OS=Apis mellifera OX=7460 GN=LOC409650 PE=3 SV=1		0	FALSE	111.407	22	15	168	15	717	79.4	8.16	56.13		15.1	2.44	48.93	38.81		57.55	6.58	11.45	7.36			39.95	5.9	38.18		48.58	22.11	26.16	11		7	2	13	8		12	3	4	3			5
FALSE	High	Master Protein	A0A088ATA4	Sorting nexin OS=Apis mellifera OX=7460 PE=3 SV=1		0	FALSE	44.657	24	8	22	8	404	46.8	6.14	17.7			2.84		5.05					0			9.67		12.3			5.31	0	5			2		1					1			4
FALSE	High	Master Protein	A0A088ALU3	Spaetzle domain-containing protein OS=Apis mellifera OX=7460 PE=4 SV=1		0	FALSE	34.938	24	5	51	5	323	36.8	8.51		7.1	13.39	10.75	10.99			6.97		9.28	1.78	2.14	3.75	1.87	0	2.08	8.7	0		11.6		3	4	4	3			3		2	1	1	2	1
FALSE	High	Master Protein	A0A088ANZ7	Spectrin beta chain OS=Apis mellifera OX=7460 GN=beta-Spec PE=3 SV=1		0	FALSE	1756.86	72	149	3709	148	2401	277.6	5.71	856.55	759.77	331.18	242.36	647.31	722.08	712.43	390.96	158.24	317.85	556.8	539.31	187.98	1106.13	120.7	570.53	883.99	851.53	667.46	362.18	112	113	87	81	103	112	112	83	46	75	81	87	47	93
FALSE	High	Master Protein	A0A088AP45	SRP54 domain-containing protein OS=Apis mellifera OX=7460 GN=Gtp-bp PE=4 SV=1		0	FALSE	14.952	8	3	11	3	614	69.3	8.5	6.48					4.23	4.04							2.81		3.04	1.93		2.43		1					1	2							1
FALSE	High	Master Protein	A0A088ANW3	SSD domain-containing protein OS=Apis mellifera OX=7460 GN=LOC408992 PE=4 SV=1		0.006	FALSE	3.307	1	1	2	1	1240	140.9	6.21			2.19																				1
FALSE	High	Master Protein	A0A087ZWG1	SSD domain-containing protein OS=Apis mellifera OX=7460 PE=4 SV=1		0.001	FALSE	4.715	2	2	4	2	1442	161.6	6.89	0															0		2.03			1
FALSE	High	Master Protein	A0A087ZQD4	Staphylococcal nuclease domain-containing protein OS=Apis mellifera OX=7460 GN=Tudor-SN PE=4 SV=1		0	FALSE	212.503	47	34	156	34	892	100.9	7.96	88.06	0		2.22		24.87	3.49	2.02	9.98	0	22.17	22.31	6.99	94.39		74.27	3.42	11.05	26.67	0	21	2		7		9	1	2	4	3	8	9	4	17
FALSE	High	Master Protein	A0A088A5D9	STAS domain-containing protein OS=Apis mellifera OX=7460 GN=100576446 PE=3 SV=1		0.002	FALSE	4.563	3	1	2	1	682	75	8.38	3.21																	2.4			1
FALSE	High	Master Protein	A0A087ZRM4	STI1 domain-containing protein OS=Apis mellifera OX=7460 PE=4 SV=1		0	FALSE	18.678	33	3	7	3	151	16.9	8.28	4.5			0										3.86		3.7					1			1										1
FALSE	High	Master Protein	A0A087ZTD1	Str_synth domain-containing protein OS=Apis mellifera OX=7460 PE=4 SV=1		0	FALSE	89.92	26	15	193	15	564	63.1	9.09	41.16	20.96	13.74	9.22	19.21	15.82	29.6	14.96	3.94	1.91	18.94	7.52	6.45	30.95	0	50.19	42.25	25.64	22.97	17.51	10	7	6	5	6	6	9	6	2	2	6	5	5	7
FALSE	High	Master Protein	A5A5E4	Structural cuticle protein (Fragment) OS=Apis mellifera OX=7460 PE=2 SV=1		0	FALSE	90.456	43	3	748	3	138	14.6	4.41	76.07	78.33	86.09	89.43	76.98	44.66	77.33	80.62	45.85	79.56	153.02	508.17	597.86	124.97	37.34	47.88	61.8	75.55	88.36	89.06	1	2	1	1	1	1	2	2	1	2	1	1	1	2
FALSE	High	Master Protein	A0A088A3W0	Succinate dehydrogenase [ubiquinone] cytochrome b small subunit OS=Apis mellifera OX=7460 GN=LOC725566 PE=3 SV=1		0	FALSE	46.247	55	6	82	6	201	22.3	9.32	3.36	3.54	4.89	3.08	6.07	3.55	4.04	11.19	2.06		0	0	0	44.22	0	1.69	1.44	2.06	3.36	1.73	2	3	4	3	4	1	4	4	3		3	2	3	4
FALSE	High	Master Protein	A0A088A6T4	Succinate dehydrogenase [ubiquinone] flavoprotein subunit, mitochondrial OS=Apis mellifera OX=7460 GN=SdhA PE=3 SV=1		0	FALSE	361.749	59	26	673	26	661	72.4	7.18	181.84	146.39	94.83	68.29	143.76	113.05	117.22	121.4	57.05	39.42	42.97	16.28	89.31	178.16	25.14	152.97	132.73	185.85	102.96	87.67	20	17	19	16	20	17	21	19	14	10	10	7	13	12
FALSE	High	Master Protein	A0A088AQ13	Succinate dehydrogenase [ubiquinone] iron-sulfur subunit, mitochondrial OS=Apis mellifera OX=7460 GN=LOC551169 PE=3 SV=1		0	FALSE	116.545	61	15	425	15	254	29	8.78	85.9	54.61	48.93	26.15	56.36	43.06	49.49	61.78	31.53	31.53	34.6	5.7	45.34	48.94	7.86	52.84	60.9	71.96	35.35	47.42	12	11	11	9	11	10	11	11	8	7	9	4	8	10
FALSE	High	Master Protein	A0A088ADV3	Succinate--CoA ligase [ADP/GDP-forming] subunit alpha, mitochondrial OS=Apis mellifera OX=7460 GN=Scsalpha PE=3 SV=1		0	FALSE	179.182	44	12	296	12	340	36	9	110.3	25.84	10.38	13.72	9.12	66.21	50.85	30.05	9.65	1.94	32.95	42.45	17.57	56.17		87.51	41.6	61.47	67.04	15.8	11	6	4	5	3	10	9	8	5	1	7	6	6	9
FALSE	High	Master Protein	A0A080UXF7	Succinate--CoA ligase [ADP-forming] subunit alpha OS=Serratia marcescens OX=615 GN=sucD PE=3 SV=1		0	FALSE	5.38	4	1	1	1	290	29.8	7.08			1.9																				1
FALSE	High	Master Protein	A0A088ARY0	Succinate--CoA ligase [ADP-forming] subunit beta, mitochondrial OS=Apis mellifera OX=7460 PE=3 SV=1		0	FALSE	153.428	56	19	282	19	448	48.6	7.33	87.78	34.94	18.97	28.08	1.62	50.17	41.04	19.73	8.47	0	59.3	32.02	55.6	58.81		63.61	43.41	40.03	57.16	6.97	11	10	6	10	2	11	13	6	3	1	9	7	11	7
FALSE	High	Master Protein	V5T6X6	Succinate-semialdehyde dehydrogenase OS=Bifidobacterium sp. Hma3N OX=1293831 PE=3 SV=1		0.005	FALSE	3.51	3	1	2	1	457	49.6	4.91								0																				1
FALSE	High	Master Protein	A0A087ZSQ3	Succinyl-CoA:3-ketoacid-coenzyme A transferase OS=Apis mellifera OX=7460 GN=LOC409157 PE=3 SV=1		0	FALSE	75.199	41	13	51	13	541	58.9	5.57	18.93	2.7				13.66	2.82				13.58	0	0	15.27		23.48		4.02	3.24		6	1				7	3				4	1	2	4
FALSE	High	Master Protein	A0A087ZV66	SUI1 domain-containing protein OS=Apis mellifera OX=7460 GN=102654691 PE=4 SV=1		0	FALSE	5.37	13	1	1	1	110	12.4	6.77												2.64																				1
FALSE	High	Master Protein	A0A088AUJ3	Sulfatase domain-containing protein OS=Apis mellifera OX=7460 GN=LOC552073 PE=4 SV=1		0.005	FALSE	3.578	2	1	1	1	546	61.1	6.89				1.89																				1
FALSE	High	Master Protein	A0A088ARE4	SUMO-activating enzyme subunit OS=Apis mellifera OX=7460 GN=Uba2 PE=3 SV=1		0	FALSE	5.733	4	2	2	2	666	74.1	5.76											1.73			0																	1			1
FALSE	High	Master Protein	Q7YXM6	Superoxide dismutase [Cu-Zn] OS=Apis mellifera ligustica OX=7469 GN=Sod1 PE=2 SV=1		0	FALSE	52.827	47	7	79	7	152	15.6	6.71	12.94	20.95		16.62	6.33	2.47	14.23	10.29	11.04	15.29	2.39	20.58	9.92	18.91		9.64			2.81	0	4	6		5	3	1	5	3	4	7	1	5	3	4
FALSE	High	Master Protein	A0A1B1JID1	Superoxide dismutase [Cu-Zn] OS=Apis mellifera OX=7460 PE=2 SV=1		0.003	FALSE	4.103	9	1	1	1	177	18.9	6.86												2.36																				1
FALSE	High	Master Protein	A0A088A1K0	Superoxide dismutase OS=Apis mellifera OX=7460 GN=Sod2 PE=3 SV=1		0	FALSE	76.308	52	9	136	9	218	24.5	9.04	19.55	24.79	8.22	12.19	3.93	14.91	30.99	22.03	8.73	3.06	9.22	23.31	69.27	30.82		15.71	23.56	19.82	18.62	6.48	5	4	3	4	1	5	4	4	4	1	2	4	8	3
FALSE	High	Master Protein	A0A2G5S816	Superoxide dismutase OS=Serratia marcescens OX=615 GN=CS366_06715 PE=3 SV=1		0	FALSE	8.37	7	1	3	1	206	23.3	6.74			4.98					2.04															1					1
FALSE	High	Master Protein	A0A088A2C3	SURF1-like protein OS=Apis mellifera OX=7460 GN=Surf1 PE=3 SV=1		0	FALSE	30.603	20	6	6	6	307	36.2	9.76			2.34									2.65	0	5.75					2.86				1									1	1	2
FALSE	High	Master Protein	V5T7A2	Surface layer protein OS=Lactobacillus helsingborgensis OX=1218494 GN=JF73_14730 PE=4 SV=1		0	FALSE	28.949	8	4	19	1	593	61.9	9.19			30.62	0					2.12				2.71							2			3	1					1				1
FALSE	High	Master Protein	V5T8V6	Surface layer protein OS=Lactobacillus kimbladii OX=1218506 GN=JF75_16750 PE=4 SV=1		0	FALSE	54.108	10	7	34	5	603	63.1	9.36			60.91						0				4.97			5.3		2.25					7						1				3
FALSE	High	Master Protein	V5T8R4	Surface layer protein OS=Lactobacillus sp. Hma11N OX=1218505 PE=4 SV=1		0	FALSE	30.04	9	4	19	3	577	60	9.48			18.32	0				2.09	0											2			1	2				2	1
FALSE	High	Master Protein	A0A088AFD4	SWIB domain-containing protein OS=Apis mellifera OX=7460 GN=LOC408520 PE=4 SV=1		0	FALSE	53.631	23	5	92	5	261	29.2	7.83	44.39	13.36	7.33	18.19	3.9	15.73	13.86	8.25	10.59	11.92	12.74	4.72	11.98	20.57	0	12.07	10.35	4.12	4.7	10.39	5	3	2	5	1	1	5	2	3	2	3	3	4	3
FALSE	High	Master Protein	A0A088A062	Synaptosomal-associated protein OS=Apis mellifera OX=7460 PE=3 SV=1		0	FALSE	45.384	44	5	42	5	162	18.1	4.89	6.9	9.24	4.43	2.17		9.74	17.55				14.77	10.19	3.47	14.92			9.03	3.49		4.74	2	2	2	1		2	4				3	4	2	2
FALSE	High	Master Protein	A0A088ARZ3	Syndecan OS=Apis mellifera OX=7460 PE=3 SV=1		0	FALSE	12.225	15	2	2	2	212	23.3	4.58											2.51			3.61																	1			1
FALSE	High	Master Protein	A0A088A105	Syntaxin-18_N domain-containing protein OS=Apis mellifera OX=7460 GN=Syx18 PE=4 SV=1		0	FALSE	5.334	4	1	1	1	323	37.4	5.86														2.86																				1
FALSE	High	Master Protein	A0A087ZVJ2	TACC_C domain-containing protein OS=Apis mellifera OX=7460 PE=4 SV=1		0	FALSE	5.627	2	2	2	2	948	106.5	4.63	0															2.51					1
FALSE	High	Master Protein	A0A088A0K5	Tafazzin family protein OS=Apis mellifera OX=7460 PE=3 SV=1		0	FALSE	6.28	12	2	2	2	284	33	9.47							2.58																				2
FALSE	High	Master Protein	Q5XUU6	Take-out-like carrier protein JHBP-1 OS=Apis mellifera OX=7460 PE=2 SV=1		0	FALSE	69.257	52	14	100	14	253	29.2	8.32	16.44	6.7	1.98	36.96	1.98	5.76	6.95	6.26	6.31	6.4	15.62	24.53	2.01	12.43	0	2.18	20.53	4.74	9.02	6.26	6	2	2	11	1	2	3	2	2	2	6	7	1	4
FALSE	High	Master Protein	A0A088AVZ9	T-complex protein 1 subunit alpha OS=Apis mellifera OX=7460 GN=LOC409134 PE=3 SV=1		0	FALSE	138.56	44	19	123	19	557	59.9	5.91	53.87	9.02		3.03	2.77	25.66	20.26	2.71	2.79		10.61	9.73	12.83	54.65		48.46	19.17	12.99	25.92	2.48	11	4		1	1	6	7	1	3		6	4	6	11
FALSE	High	Master Protein	A0A088AHM7	T-complex protein 1 subunit delta OS=Apis mellifera OX=7460 GN=LOC551275 PE=3 SV=1		0	FALSE	146.979	48	18	132	18	534	57.3	7.42	60.91	14.88	0	2.39	8.58	33.54	19.07	5.01	8.52		4.88	1.67	2.17	29.89		68.28	20.49	17.92	30.76	0	14	7	1	2	3	8	6	2	3		2	1	1	7
FALSE	High	Master Protein	A0A087ZUG4	T-complex protein 1 subunit eta OS=Apis mellifera OX=7460 GN=Tcp-1eta PE=3 SV=1		0	FALSE	136.283	54	21	119	21	542	59.9	6.42	71.14	2.37				24.32	14.55	1.93	1.89		6.5	6.58	8.4	46.62		52.34	14.95	6.17	18.84		15	2				7	8	1	1		2	3	5	9
FALSE	High	Master Protein	A0A088A3C0	T-complex protein 1 subunit gamma OS=Apis mellifera OX=7460 GN=Cctgamma PE=3 SV=1		0	FALSE	112.148	45	22	118	22	550	61	6.57	32.86	17.71	2.45	6.9	6.04	11.27	22.81	6.34	6.2	8.6	15.24	14.17	7.14	47.84	1.88	31.71	18.45	6.81	24.51	8.15	10	8	1	2	2	3	7	2	2	2	5	7	4	12
FALSE	High	Master Protein	A0A087ZVC8	TCTP domain-containing protein OS=Apis mellifera OX=7460 GN=Tctp PE=3 SV=1		0	FALSE	34.234	50	6	23	6	172	19.8	4.7	13.92	0		1.85		4.2	0				2.03	2.03	2.24	9.09		7.12					3	1		1		2	1				1	1	2	3
FALSE	High	Master Protein	A0A088AV46	Tetraspanin OS=Apis mellifera OX=7460 GN=102656585 PE=3 SV=1		0	FALSE	9.21	11	3	8	3	264	29.3	7.33	1.62						1.73		1.66		2.23	1.74	1.66	2.04							1						1		1		1	1	1	2
FALSE	High	Master Protein	A0A088AJF6	Tetraspanin OS=Apis mellifera OX=7460 GN=Tspan11 PE=3 SV=1		0	FALSE	8.143	6	1	3	1	285	31.6	6.2	3.92															2.85		2.68			1
FALSE	High	Master Protein	A0A088AUG1	Tetraspanin OS=Apis mellifera OX=7460 GN=Tspan13 PE=3 SV=1		0	FALSE	16.138	13	3	27	3	238	26.2	7.72	0	0	2.04		0	0	2.42	2	0	0	2.13	1.95	1.86	3.34	0	0	0			0	1	1	1		1	1	1	1	1	1	1	1	1	1
FALSE	High	Master Protein	A0A088A8X8	Tetraspanin OS=Apis mellifera OX=7460 GN=Tspan3 PE=3 SV=1		0	FALSE	33.778	22	5	90	5	241	27.3	7.08	24.83		5.96	5.81	18.09	5.67		13.66	6.71	4.22				11.49	3.46	25.56		12.9	8.42	11.53	3		2	2	4	3		3	3	3				4
FALSE	High	Master Protein	A0A088ASL1	Tetraspanin OS=Apis mellifera OX=7460 GN=Tspan9 PE=3 SV=1		0.003	FALSE	4.075	6	1	1	1	267	28.5	5.05							0																				1
FALSE	High	Master Protein	Q9NB07	Tetraspanin OS=Apis mellifera OX=7460 PE=2 SV=1		0	FALSE	11.628	10	2	53	2	232	25.3	6.7	12.39	4.6	4.22	0	6.83	2.1	6.18	1.87	3.64	0	4.08	1.95	3.46	3.68	1.88	4.02	11.02	5.69	8.88	1.79	2	2	2	1	2	1	2	1	1	1	1	1	1	1
FALSE	High	Master Protein	A0A088AJI0	TFCD_C domain-containing protein OS=Apis mellifera OX=7460 PE=4 SV=1		0	FALSE	6.212	2	1	2	1	1130	128.8	6.29	2.49															2.24					1
FALSE	High	Master Protein	A0A088AKR6	TGc domain-containing protein OS=Apis mellifera OX=7460 GN=LOC409425 PE=4 SV=1		0	FALSE	43.812	19	9	10	9	713	80.6	5.01	3.1			3.17								2.22		10.23		5.12					1			2								1		4
FALSE	High	Master Protein	A0A087ZQT4	TGS domain-containing protein OS=Apis mellifera OX=7460 GN=100576663 PE=4 SV=1		0	FALSE	39.55	37	10	26	10	329	37.5	8.66	10.66					6.53	0				4.84		4.07	8.23		10.6	3.46	2.64	0		4					2	1				2		2	6
FALSE	High	Master Protein	A0A088AEC7	ThiF domain-containing protein OS=Apis mellifera OX=7460 GN=Aos1 PE=4 SV=1		0.002	FALSE	4.41	5	1	1	1	334	37.7	6.27	3.42																				1
FALSE	High	Master Protein	A0A088AGN1	ThiF domain-containing protein OS=Apis mellifera OX=7460 PE=4 SV=1		0	FALSE	15.529	27	2	4	2	130	14.2	4.94	5.59													2.73		2.47					1													1
FALSE	High	Master Protein	A0A088ATM7	Thioredox_DsbH domain-containing protein OS=Apis mellifera OX=7460 GN=SPATA20 PE=4 SV=1		0	FALSE	6.62	2	1	1	1	804	92.9	7.69	4.33																				1
FALSE	High	Master Protein	A0A087ZSW3	Thioredoxin domain-containing protein OS=Apis mellifera OX=7460 GN=726314 PE=4 SV=1		0	FALSE	29.213	20	6	29	6	285	33.1	8.63		3.91	1.63	1.82	4.88	2.17	1.9	4.26			5.04		6.23	13	1.68		2.95	2.75		2.55		2	1	1	2	1	1	2			2		4	3
FALSE	High	Master Protein	A0A088AS52	Thioredoxin domain-containing protein OS=Apis mellifera OX=7460 GN=LOC411255 PE=4 SV=1		0	FALSE	57.417	40	9	49	9	296	34.2	6.27	11.72	2.84	4.14		3.72	7.67	9.38	2.16	0	3.57	0			4.31	0	19.31	19.16	11.77	11.17	2.25	3	3	3		2	2	3	3	1	2	1			1
FALSE	High	Master Protein	A0A087ZY71	Thioredoxin domain-containing protein OS=Apis mellifera OX=7460 GN=LOC411391 PE=4 SV=1		0	FALSE	5.708	7	2	5	2	268	31.1	9.22	2.58	0					0										1.73				1	1					1
FALSE	High	Master Protein	A0A087ZND2	Thioredoxin domain-containing protein OS=Apis mellifera OX=7460 GN=Tpx-1 PE=4 SV=1		0	FALSE	169.875	84	17	188	17	194	21.8	5.97	96.29	7.96	2.29	24.67	10.06	18.55	23.48	13.78	11.43	12.72	4.86	13.2	53.38	114.86	0	46.04	5.54	14.29	11.46	7.32	13	3	1	7	3	5	7	4	6	4	4	5	11	12
FALSE	High	Master Protein	A0A087ZRJ5	Thioredoxin domain-containing protein OS=Apis mellifera OX=7460 GN=Tpx-4 PE=4 SV=1		0	FALSE	242.074	85	17	713	17	220	25.1	6.34	259.25	53	11.8	106.5	43.41	103.22	49.1	59.46	85.69	69.74	73.38	41.58	282.44	219.38	4.25	183.33	48.96	64.22	117.47	43.66	14	11	6	14	9	13	10	11	12	12	9	9	14	12
FALSE	High	Master Protein	A0A088AKM8	Thioredoxin domain-containing protein OS=Apis mellifera OX=7460 GN=Tpx-5 PE=4 SV=1		0	FALSE	59.629	57	10	24	10	220	24.9	5.48	11.21			0							3.56		5.2	18.49		12.32					3			1							2		5	7
FALSE	High	Master Protein	A0A088AA01	Thioredoxin domain-containing protein OS=Apis mellifera OX=7460 GN=Trx1-like3 PE=4 SV=1		0	FALSE	89.304	47	14	58	14	427	49.3	5.8	27.52	0		2.25	2.78	4.96	29.18	1.88	1.91		4.25	1.72		22.91		21.53	12.3	3.5	5.5	2.44	6	2		1	1	2	8	1	1		2	1		7
FALSE	High	Master Protein	A0A088ABX7	Thioredoxin domain-containing protein OS=Apis mellifera OX=7460 PE=4 SV=1		0	FALSE	57.755	30	7	120	7	291	33.4	6.28	22.5	15.58	2.94	1.64	18.87	13.11	32.54	1.68	9.89	2.33	10.93	6.59	4.19	22.68	0	19.66	40.34	22.01	17.63	16.16	7	5	3	2	6	4	7	2	5	2	3	3	3	4
FALSE	High	Master Protein	A0A087ZTI1	Thioredoxin domain-containing protein OS=Apis mellifera OX=7460 PE=4 SV=1		0	FALSE	59.168	47	7	35	7	188	20.7	5.58			0	3.77					18.62							17.17			8.91	31.77			1	2					4
FALSE	High	Master Protein	A0A088AM69	Thioredoxin OS=Apis mellifera OX=7460 GN=Trx-1 PE=3 SV=1		0	FALSE	16.091	38	4	8	4	136	15.2	8.43							2.57					1.9	0	2.39		2.92		0									1					2	1	1
FALSE	High	Master Protein	A0A088AAY9	Thioredoxin OS=Apis mellifera OX=7460 GN=Trx-2 PE=3 SV=1		0	FALSE	28.88	62	5	23	5	105	12	4.92	3.13	2.64	2.02	5.27	2.86	1.99	2.13	2.54	2.46	2.69	1.93	2.01	2.1	11.54		2.09	1.89		3.41		1	1	1	1	1	1	1	1	1	1	1	2	1	3
FALSE	High	Master Protein	A0A0M3UJN4	Thioredoxin OS=Serratia marcescens OX=615 GN=trxA PE=3 SV=1		0.006	FALSE	3.323	8	1	2	1	108	11.8	5.01			3.73																				1
FALSE	High	Master Protein	Q7YXM3	Thioredoxin peroxidase OS=Apis mellifera ligustica OX=7469 GN=Tpx-3 PE=2 SV=1		0	FALSE	70.235	42	8	70	8	242	27.2	8.82	44.01	13.77		13.15		14.17	12.77	2.79	4.17		14.69	8.27	16.13	21.23		24.09		5.88	2.46		5	4		5		5	3	1	2		3	3	3	3
FALSE	High	Master Protein	Q7YXM4	Thioredoxin reductase OS=Apis mellifera ligustica OX=7469 GN=Trxr-1 PE=2 SV=1		0	FALSE	54.367	29	9	37	9	485	53.2	7.33	7.06	10.07		12.11		9.68	21.97	6.73			0	5.81	4.27	17.77		3.28	3.01			2.1	2	4		3		3	6	2			1	3	3	3
FALSE	High	Master Protein	A0A088ACJ5	Thioredoxin_16 domain-containing protein OS=Apis mellifera OX=7460 GN=LOC409404 PE=4 SV=1		0	FALSE	7.327	5	1	1	1	292	33.8	7.52														3.03																				1
FALSE	High	Master Protein	A0A088AK34	Thymidylate_kin domain-containing protein OS=Apis mellifera OX=7460 GN=LOC552148 PE=3 SV=1		0	FALSE	22.542	25	3	21	3	214	24.2	6.93	16.14				5.53	11.39										11.1		0	0	0	3				1	2
FALSE	High	Master Protein	A0A087ZNG4	Tim44 domain-containing protein OS=Apis mellifera OX=7460 GN=mRpL45 PE=4 SV=1		0	FALSE	28.612	29	6	11	6	332	38.9	9.22	6.76		0		2	3.89	3.19						0	5.81		1.6					2		1		1	1	1						2	2
FALSE	High	Master Protein	A0A088ARY2	TIP120 domain-containing protein OS=Apis mellifera OX=7460 GN=LOC409918 PE=4 SV=1		0	FALSE	65.009	16	13	54	13	1235	138.7	5.74	31.71	2.29			0	12.17	9.09	4.2	1.93					7.52		22.99	2.6	4.17	1.72	0	10	4			1	4	4	3	4					4
FALSE	High	Master Protein	A0A088AHG7	TLC domain-containing protein OS=Apis mellifera OX=7460 GN=LOC410172 PE=4 SV=1		0	FALSE	13.134	8	3	4	3	377	43.3	9.58											1.92	2.02		4.92																	1	1		2
FALSE	High	Master Protein	A0A087ZST2	TLDc domain-containing protein OS=Apis mellifera OX=7460 GN=LOC412079 PE=4 SV=1		0	FALSE	12.614	4	1	1	1	488	55	7.49														5.33																				1
FALSE	High	Master Protein	A0A088A0Y8	TLDc domain-containing protein OS=Apis mellifera OX=7460 PE=4 SV=1		0.003	FALSE	4.001	4	1	1	1	481	53.9	6.62	1.82																				1
FALSE	High	Master Protein	A0A088AQ11	TOG domain-containing protein OS=Apis mellifera OX=7460 GN=LOC551331 PE=4 SV=1		0	FALSE	37.509	7	6	14	6	1315	147.6	7.01	14.7	0				7.1	2.26							6.87		6.31				0	3	1				2	1							2
FALSE	High	Master Protein	A0A087ZRD4	TOG domain-containing protein OS=Apis mellifera OX=7460 PE=4 SV=1		0	FALSE	26.845	7	5	8	5	1069	119.8	4.74	8.4													7.38							4													2
FALSE	High	Master Protein	A0A2G4P0B5	TonB-dependent siderophore receptor OS=Serratia marcescens OX=615 GN=CS368_14865 PE=3 SV=1		0	FALSE	5.98	2	1	1	1	766	83.3	6.98			2.78																				1
FALSE	High	Master Protein	A0A0B4J2M2	TP_methylase domain-containing protein OS=Apis mellifera OX=7460 GN=Dph5 PE=3 SV=1		0	FALSE	5.589	5	1	3	1	275	31.2	5.55	2.6						0									2.69					1						1
FALSE	High	Master Protein	A0A088ARK1	TPR_MLP1_2 domain-containing protein OS=Apis mellifera OX=7460 PE=4 SV=1		0	FALSE	48.889	4	7	12	7	2314	262.1	5.06	11.79						0				0			14.15		0			0		3						1				1			4
FALSE	High	Master Protein	A0A087ZYR8	TPR_REGION domain-containing protein OS=Apis mellifera OX=7460 GN=102656934 PE=4 SV=1		0	FALSE	47.66	17	7	12	7	539	61.5	6.81	3.61	2.64					5.16					2.69		18.37		2.35					1	1					2					2		4
FALSE	High	Master Protein	A0A088AR75	TPR_REGION domain-containing protein OS=Apis mellifera OX=7460 GN=LOC408464 PE=4 SV=1		0	FALSE	25.929	13	3	7	3	459	50.7	4.56	13.2															6.47					2
FALSE	High	Master Protein	A0A088ATH4	TPR_REGION domain-containing protein OS=Apis mellifera OX=7460 GN=LOC411882 PE=4 SV=1		0	FALSE	9.373	10	2	3	2	289	33.8	6.99							3.58									2.76	2.55										1
FALSE	High	Master Protein	A0A087ZZN7	TPR_REGION domain-containing protein OS=Apis mellifera OX=7460 GN=LOC412443 PE=4 SV=1		0	FALSE	8.065	6	1	1	1	245	28.7	8.38														2.99																				1
FALSE	High	Master Protein	A0A088A098	TPR_REGION domain-containing protein OS=Apis mellifera OX=7460 GN=PpD3 PE=4 SV=1		0	FALSE	12.047	11	3	5	3	489	56	6	6.96															2.81					2
FALSE	High	Master Protein	A0A088A7V2	TPR_REGION domain-containing protein OS=Apis mellifera OX=7460 GN=Sgt PE=4 SV=1		0	FALSE	13.278	15	2	3	2	299	32.8	5.17	2.71															3.01					2
FALSE	High	Master Protein	A0A088A423	TPR_REGION domain-containing protein OS=Apis mellifera OX=7460 GN=Tom70 PE=4 SV=1		0	FALSE	87.681	38	16	76	16	576	65.3	6.74	25.33	16.65	6.62	3.68	9.39		14.17	10.69	1.63	2.36	5.56	4.14	20.95	22.56		3.07	10.62	6.08	2.89		7	7	5	3	5		6	4	1	2	2	2	7	7
FALSE	High	Master Protein	A0A088AU57	TPR_REGION domain-containing protein OS=Apis mellifera OX=7460 PE=4 SV=1		0.005	FALSE	3.831	22	1	1	1	92	10.8	8.81	2.15																				1
FALSE	High	Master Protein	A0A088AGS1	TPR_REGION domain-containing protein OS=Apis mellifera OX=7460 PE=4 SV=1		0	FALSE	65.128	20	15	33	15	1028	117.8	9.99	18.59				2.71	2.44	2.48			4.74	7.64			16.97		2.09		3.42		5.21	6				1	1	1			3	3			8
FALSE	High	Master Protein	A0A087ZRM3	TPR_REGION domain-containing protein OS=Apis mellifera OX=7460 PE=4 SV=1		0	FALSE	16.9	15	3	4	3	243	27.4	4.5				0			2.07							7.05										1			1							2
FALSE	High	Master Protein	A0A088ASE7	TPR_REGION domain-containing protein OS=Apis mellifera OX=7460 PE=4 SV=1		0	FALSE	53.931	10	9	27	9	1006	115.4	7.27	11.16			2.58	3.05	2.68	5.31		7.32					12.64		17.81			9.68		4			1	1	1	2		3					3
FALSE	High	Master Protein	A0A088AU58	TPR_REGION domain-containing protein OS=Apis mellifera OX=7460 PE=4 SV=1		0	FALSE	14.168	5	3	5	3	851	95	7.52	6.31													1.64		0					2													1
FALSE	High	Master Protein	A0A087ZPV0	Transaldolase OS=Apis mellifera OX=7460 PE=3 SV=1		0	FALSE	94.736	55	16	114	16	332	37.2	8.03	32.94	8.61		10.48	5.28	22.31	7.96		4.37	4.75	26.18	19.82	9.56	29.16		32.08			34.35		10	3		5	2	8	4		2	2	6	6	4	8
FALSE	High	Master Protein	A0A1C3H8I8	Transaldolase OS=Serratia marcescens OX=615 GN=talB PE=3 SV=1		0	FALSE	7.257	11	3	4	3	317	35.1	5.49			2.01																				3
FALSE	High	Master Protein	A0A088A2T5	Transcription factor BTF3 OS=Apis mellifera OX=7460 PE=3 SV=1		0	FALSE	30.519	27	3	14	3	156	16.9	8.1	3.88	6.48		6.38		2.47	8.61					3.08		3.27							1	2		2		1	3					1		1
FALSE	High	Master Protein	A0A093UX55	Transcriptional regulator HU subunit alpha OS=Pectobacterium carotovorum subsp. carotovorum OX=555 GN=KP17_12810 PE=3 SV=1		0.009	FALSE	2.994	10	1	1	1	90	9.3	9.52			0																				1
FALSE	High	Master Protein	Q86PH6	Transferrin OS=Apis mellifera OX=7460 GN=trf PE=2 SV=1		0	FALSE	69.63	24	11	21	11	712	78.6	7.06		0		20.74						5.7				26.07								1		9						3				5
FALSE	High	Master Protein	A0A088AJ47	Transgelin OS=Apis mellifera OX=7460 GN=Chd64 PE=3 SV=1		0	FALSE	60.333	62	10	44	10	188	20.8	8.41	16.88	12.92	2.56	21.37			12.11					4.4	2	14.63		16.66			6.13		4	6	1	9			5					3	1	3
FALSE	High	Master Protein	A0A088ASZ6	Transgelin OS=Apis mellifera OX=7460 GN=Mp20 PE=3 SV=1		0	FALSE	129.601	73	17	161	11	184	20.5	8.66	81.12	24.34	3.19	47.27	9.45	59.59	16.79	3.59	7.85	9.68	13.02	31.82	14.07	13.16	0	93.79	9.33	9.51	11.97	11.96	9	4	1	9	2	9	3	1	2	2	5	6	5	4
FALSE	High	Master Protein	A0A087ZNF1	Transgelin OS=Apis mellifera OX=7460 PE=3 SV=1		0	FALSE	60.109	54	8	63	2	121	13.1	9.54	43.06	7.97		17.83	2.72	33.96	3		0		7.06	12.49	2.29	3.19		57.83			3.11		4	2		4	1	4	1		1		2	2	2	1
FALSE	High	Master Protein	A0A088A461	Transient receptor potential cation channel protein painless OS=Apis mellifera OX=7460 GN=Pain PE=2 SV=1		0	FALSE	5.569	3	2	3	2	892	102.6	7.12	0					0								0							1					1								1
FALSE	High	Master Protein	A0A088AUY4	Transket_pyr domain-containing protein OS=Apis mellifera OX=7460 GN=LOC550804 PE=4 SV=1		0	FALSE	221.243	61	26	287	26	622	67.4	7.74	98.19	51.82	2.88	29.5	49.84	42.8	79.86	74.54	6.27	24.67	12.8	25.7	0	66.13		48.77	14.4	19.6	67.2	14.37	17	15	2	12	12	11	15	16	4	8	4	10	1	12
FALSE	High	Master Protein	A0A088AHH8	Transket_pyr domain-containing protein OS=Apis mellifera OX=7460 PE=4 SV=1		0	FALSE	502.335	54	47	755	47	1121	126.5	8.09	269.15	57.76	30.52	33.65	41.8	218.72	101.15	87.4	48.35	17.25	109.05	69.2	83.17	151.56	1.8	277.46	170.19	116.99	160.78	25.3	33	18	13	17	11	34	22	23	13	7	19	18	23	21
FALSE	High	Master Protein	A0A088AJ89	Translocon-associated protein subunit beta OS=Apis mellifera OX=7460 GN=SsRbeta PE=3 SV=1		0.008	FALSE	3.059	6	1	2	1	191	21.9	7.14			1.67														0						1
FALSE	High	Master Protein	A0A088A1M4	Transmembrane 9 superfamily member OS=Apis mellifera OX=7460 GN=LOC552723 PE=3 SV=1		0	FALSE	30.64	16	7	10	7	632	72.4	8.82	5.67				2.54		6.23				1.92	0	3.69	3.32							2				1		2				1	1	1	1
FALSE	High	Master Protein	A0A088AA94	Transmembrane 9 superfamily member OS=Apis mellifera OX=7460 PE=3 SV=1		0	FALSE	13.219	5	3	9	3	586	67.8	6.65		2.01					1.97				2.9	0	0	5.83								1					1				1	1	2	2
FALSE	High	Master Protein	A0A088AJW4	Transporter OS=Apis mellifera OX=7460 GN=725456 PE=3 SV=1		0	FALSE	7.657	3	2	2	2	623	70.2	6.54	0													2.02							1													1
FALSE	High	Master Protein	A0A088A4T6	Transporter OS=Apis mellifera OX=7460 GN=NT-5 PE=3 SV=1		0	FALSE	26.46	6	6	34	6	888	99.3	7.08	2.29	6.51	2.95		7.73	9.13	19.28	3.22			6.98			0			8.69	2.18	0		1	4	2		4	3	4	1			1			1
FALSE	High	Master Protein	A0A088AJX6	Transporter OS=Apis mellifera OX=7460 PE=3 SV=1		0	FALSE	5.786	3	1	1	1	616	70.2	7.68																		2.83
FALSE	High	Master Protein	A0A087ZPI0	TRASH domain-containing protein OS=Apis mellifera OX=7460 GN=RpL24 PE=4 SV=1		0	FALSE	35.032	36	7	115	7	154	17.5	10.98	17.79	10	8.34	7.3	12.58	11.79	10.43	7.15	8.42	5.56	10.95	3.84		61.03	3.97	9.87	10.11	12.33	5.94	10.08	6	5	3	3	4	5	6	2	3	3	1	2		2
FALSE	High	Master Protein	A0A088AUT8	Trehalase OS=Apis mellifera OX=7460 GN=LOC410795 PE=3 SV=1		0.006	FALSE	3.174	3	1	1	1	662	77.2	6.19																		0
FALSE	High	Master Protein	A4ZXC4	Triosephosphate isomerase OS=Apis mellifera OX=7460 GN=Tpi PE=2 SV=1		0	FALSE	91.524	68	12	90	12	247	26.9	8.05	28.07	7.64		13.46	5.31	21.58	5.57	1.67	2.21	2.89	24.56	9.24	19.51	18.67		28.8			22.55	2.71	6	3		6	2	7	2	1	1	2	6	4	6	5
FALSE	High	Master Protein	A0A088APT9	tRNA pseudouridine synthase OS=Apis mellifera OX=7460 GN=LOC725326 PE=3 SV=1		0	FALSE	10.56	6	1	4	1	313	36.7	9.01	6.01						0											0			1						1
FALSE	High	Master Protein	A0A088AKU7	tRNA pseudouridine synthase OS=Apis mellifera OX=7460 PE=4 SV=1		0.001	FALSE	4.588	3	1	4	1	389	45.6	8.06	4.14															2.98			2.36		1
FALSE	High	Master Protein	A0A088AJD4	tRNA-synt_1e domain-containing protein OS=Apis mellifera OX=7460 PE=4 SV=1		0	FALSE	20.917	13	5	15	5	427	49.2	8.68	2.84	4.39				2.82	4.87	6.44									5.58	2.65		7.34	1	2				1	2	3
FALSE	High	Master Protein	A0A088AEZ6	tRNA-synt_1g domain-containing protein OS=Apis mellifera OX=7460 PE=3 SV=1		0	FALSE	8.649	3	2	2	2	778	91.3	8.7																5.67
FALSE	High	Master Protein	I7LRF0	Troponin C type I OS=Apis mellifera OX=7460 GN=TpnCI PE=4 SV=1		0	FALSE	113.716	63	16	318	16	145	16.8	4.27	26.61	38.22	18.91	42.39	42.94	50.11	47.76	11.47	31.73	44.71	30.44	197.64	7.52	69.77	22.86	7.73	24.03	55.76	23.31	15.71	7	5	4	10	11	11	11	2	9	10	5	14	2	9
FALSE	High	Master Protein	A0A088A1R8	Troponin C type IIa OS=Apis mellifera OX=7460 PE=4 SV=1		0	FALSE	11.202	13	1	1	1	150	16.7	4.17														4.49																				1
FALSE	High	Master Protein	I7LST5	Troponin C type IIb OS=Apis mellifera OX=7460 GN=TpnCIIb PE=4 SV=1		0	FALSE	14.788	10	1	2	1	148	17	4.42												0		5.83																		1		1
FALSE	High	Master Protein	I7KJQ1	Troponin C type IIIa OS=Apis mellifera OX=7460 GN=TpnCIIIa PE=4 SV=1		0	FALSE	16.399	31	3	4	3	153	17.3	4.17									0	6.56																			1	3
FALSE	High	Master Protein	Q3B708	Troponin I isoform 6a1 OS=Apis mellifera OX=7460 GN=TpnI PE=4 SV=1		0	FALSE	126.644	39	16	500	8	212	25.4	9.72	53.56	47.31	45.15	48.98	133.19	91.28	90.42	15.29	42.68	77.64	54.97	221.72	0	118.43	34.37	29.94	39.55	93.14	34.82	39.77	10	9	9	11	12	12	12	3	9	10	8	11	2	10
FALSE	High	Master Protein	Q3B706	Troponin I isoform 6b2 OS=Apis mellifera OX=7460 GN=TpnI PE=4 SV=1		0	FALSE	59.251	44	13	202	5	204	24.4	9.8	22.03	8.34	9.88	16.88	40.43	30.27	25.29		12.96	19.76	14.53	35.15		27.52	7.44	12.53	10.01	33.7	19.85	7.81	5	4	4	6	7	10	7		5	7	4	8		6
FALSE	High	Master Protein	Q3B714	Troponin T isoform 3 OS=Apis mellifera OX=7460 GN=TpnT PE=4 SV=1		0	FALSE	263.801	48	27	926	27	395	47.6	4.69	139.72	119.1	48.18	88.22	194.91	153.87	158.25	13.66	45.71	145.41	79.15	381.01	13.88	207.01	47.81	20.07	84.82	143.09	73.62	63.99	16	19	12	19	22	22	21	4	8	20	11	22	4	16
FALSE	High	Master Protein	A0A088ACC0	TROVE domain-containing protein OS=Apis mellifera OX=7460 GN=LOC724212 PE=4 SV=1		0	FALSE	6.866	2	1	1	1	546	62.1	9.1											2.46																				1
FALSE	High	Master Protein	A0A088AIB2	Tr-type G domain-containing protein OS=Apis mellifera OX=7460 GN=eIF5B PE=4 SV=1		0	FALSE	15.49	7	4	8	4	1050	119.1	6.11	3.91			4.8										3.89		4.22					2			1										2
FALSE	High	Master Protein	A0A088A152	Tr-type G domain-containing protein OS=Apis mellifera OX=7460 GN=Elf PE=4 SV=1		0	FALSE	41.427	13	5	6	5	598	65.9	5.59	2.09													14.39		3.11					1													3
FALSE	High	Master Protein	A0A088A5X7	Tr-type G domain-containing protein OS=Apis mellifera OX=7460 GN=LOC409167 PE=4 SV=1		0	FALSE	246.962	53	32	197	32	844	94.5	6.52	99.06	9.58		16.44	19.21	30.96	17.4	8.01	13.03	10.65	6.91	19.93	2.13	82.33		77.85	14.13	2.69	28.91	2.09	21	9		10	6	6	8	5	6	6	5	10	1	14
FALSE	High	Master Protein	A0A088AA44	Tr-type G domain-containing protein OS=Apis mellifera OX=7460 GN=LOC410414 PE=4 SV=1		0	FALSE	27.345	8	6	17	6	980	110.3	5.4	10.59	0			0	2.52	0							5.22		2.19	2.62	3.2	3.43		3	1			1	1	2							2
FALSE	High	Master Protein	A0A087ZT79	Tr-type G domain-containing protein OS=Apis mellifera OX=7460 PE=4 SV=1		0	FALSE	30.158	14	7	22	7	690	78.1	8.5	11.05	2.76	2.58	2.38		3.63	1.64	2.26	3.35		4.15			2.78		4.72		1.8	0		4	1	1	2		1	2	1	1		2			1
FALSE	High	Master Protein	A0A088ADU3	Tr-type G domain-containing protein OS=Apis mellifera OX=7460 PE=4 SV=1		0	FALSE	5.119	2	1	1	1	908	100.9	6.4														2.57																				1
FALSE	High	Master Protein	A0A087ZT96	Tr-type G domain-containing protein OS=Apis mellifera OX=7460 PE=4 SV=1		0	FALSE	15.339	4	2	4	2	901	102.1	8.56	3.86						2.5									3.32					1						1
FALSE	High	Master Protein	A0A088ALI2	t-SNARE coiled-coil homology domain-containing protein OS=Apis mellifera OX=7460 GN=LOC726840 PE=4 SV=1		0.001	FALSE	4.779	10	1	2	1	112	13.1	6.54							2.33										1.77										1
FALSE	High	Master Protein	A0A088A9P5	t-SNARE coiled-coil homology domain-containing protein OS=Apis mellifera OX=7460 GN=Syx7 PE=3 SV=1		0	FALSE	95.475	53	10	64	10	271	30.7	8.12	18.65	4.87	9.17	1.7		8.99	15.77	7.06		2.67	5.24	4.36	0	31.88		12.88	17.44	17.85	8.6	3.36	6	2	4	1		4	4	2		1	2	3	1	7
FALSE	High	Master Protein	A0A087ZW55	t-SNARE coiled-coil homology domain-containing protein OS=Apis mellifera OX=7460 PE=3 SV=1		0	FALSE	25.531	21	4	7	4	331	38	5.4	2.57						2.69							7.84		0					1						2							3
FALSE	High	Master Protein	A0A088AKL6	Tubulin alpha chain OS=Apis mellifera OX=7460 GN=LOC408388 PE=3 SV=1		0	FALSE	396.83	73	28	1694	2	450	49.9	5.14	363.68	296.67	69.27	173.84	92.64	186.26	344.26	103.27	128.98	70.44	271.35	468.57	415.8	652.49	17.1	327.56	283.77	154.72	287.02	100.68	23	19	13	19	14	19	22	13	13	12	14	17	17	22
FALSE	High	Master Protein	A0A088ANF0	Tubulin alpha chain OS=Apis mellifera OX=7460 GN=LOC411519 PE=3 SV=1		0	FALSE	130.95	24	8	596	1	448	50.4	5.43	139.92	125.53	31.55	65.43	29.45	67.61	129.54	39.13	48.34	22.22	109.17	89.36	75.09	156.43	1.67	114.23	98.55	57.14	108.03	37.22	6	7	5	7	5	6	6	4	4	4	6	7	6	7
FALSE	High	Master Protein	A0A088A436	Tubulin alpha chain OS=Apis mellifera OX=7460 GN=LOC550827 PE=3 SV=1		0	FALSE	366.834	64	27	1644	1	450	49.9	5.14	359.53	294.67	69.27	162.65	87.14	180.49	323.98	94.64	124.49	66.65	271.35	394.9	389.69	662.29	17.1	316.76	269	148.2	272.19	95.71	22	19	13	18	13	19	22	12	12	11	14	17	17	22
FALSE	High	Master Protein	A0A088ATP8	Tubulin alpha chain OS=Apis mellifera OX=7460 PE=3 SV=1		0	FALSE	119.431	21	10	544	2	480	53.6	5.38	135.87	124.23	29.35	72.36	38.41	75.48	137.81	46.55	50.6	30.07	97.57	53.96	66.72	98.9	1.67	121.94	122.97	68.65	139.13	51.8	8	7	4	6	5	5	8	5	5	4	3	5	5	5
FALSE	High	Master Protein	Q86ZW8	Tubulin beta chain (Fragment) OS=Antonospora locustae OX=278021 GN=btub PE=3 SV=1		0	FALSE	61.962	12	6	546	1	387	43	6.24	89.84	83.94	26.28	63.72	31.39	62.99	86.31	29.05	53.28	33.47	136.78	60.45	54.65	265.61	4.19	92.53	66.2	45.8	71.44	35.23	6	6	4	6	5	6	6	5	5	5	3	4	4	4
FALSE	High	Master Protein	A1E356	Tubulin beta chain (Fragment) OS=Nosema sp. BZ-2006e OX=415164 PE=3 SV=1		0	FALSE	25.36	9	4	185	1	386	42.9	6.33	34.96	37.37	14.24	21.5	4.84	10.37	38.7	7.42	36.93	6.27	59.01	10.73	21.62	39.42	0	29.11	23.5	7.58	23.09	6.63	2	3	2	3	1	2	3	1	3	1	2	2	2	2
FALSE	High	Master Protein	A0A087ZYZ1	Tubulin beta chain OS=Apis mellifera OX=7460 GN=LOC408782 PE=3 SV=1		0	FALSE	572.074	82	30	2500	9	447	50.1	4.86	503.3	421.27	119.71	254.72	151.61	325.03	484.46	180.61	174.47	142.62	465.39	512.73	509.82	1284.04	22.39	457.66	366.53	224.87	401.68	167.45	26	26	19	24	19	27	28	22	16	22	19	25	23	23
FALSE	High	Master Protein	A0A087ZSC1	Tubulin beta chain OS=Apis mellifera OX=7460 GN=LOC410559 PE=3 SV=1		0	FALSE	219.623	33	15	1124	1	447	49.9	4.89	234.05	187.18	59.54	128.35	74.43	146.7	204.68	82.01	98.67	60.41	205.84	180.59	231.97	449.46	10.33	200.45	153.39	97.42	166	77.87	14	14	11	14	12	15	15	12	11	12	9	11	11	11
FALSE	High	Master Protein	A0A087ZYZ2	Tubulin beta chain OS=Apis mellifera OX=7460 GN=LOC410994 PE=3 SV=1		0	FALSE	229.98	43	17	1103	2	455	51	4.86	182.4	160.34	61.44	121.08	65.17	122.64	184.13	73.99	102.33	69.96	233.62	170.84	234.65	529.86	13.88	203.95	151.29	97.54	149.17	91.53	13	13	9	12	10	13	15	9	10	11	8	11	10	10
FALSE	High	Master Protein	C4V944	Tubulin beta chain OS=Nosema ceranae (strain BRL01) OX=578460 GN=NCER_101053 PE=3 SV=1		0	FALSE	26.416	11	4	184	1	439	49.1	5.06	34.96	37.37	14.24	21.5	4.84	10.37	38.7	7.42	36.93	6.27	59.01	10.73	21.62	39.42	0	29.11	21.7	7.58	23.63	6.63	2	3	2	3	1	2	3	1	3	1	2	2	2	2
FALSE	High	Master Protein	A0A088ACY5	Tubulin gamma chain OS=Apis mellifera OX=7460 GN=TUBG1 PE=3 SV=1		0	FALSE	9.94	6	2	2	2	453	51.3	6.18	3.22													2.7							1													1
FALSE	High	Master Protein	A0A088AKW3	Tubulin-specific chaperone A OS=Apis mellifera OX=7460 GN=LOC725630 PE=3 SV=1		0.009	FALSE	2.953	9	1	2	1	118	13.9	5.19												0	0																			1	1
FALSE	High	Master Protein	A0A088AD82	Tudor domain-containing protein OS=Apis mellifera OX=7460 GN=551474 PE=4 SV=1		0	FALSE	32.029	8	3	5	3	607	67.9	5.35													0	14.15																			1	3
FALSE	High	Master Protein	B8XIJ0	Tweedle motif cuticular protein 1 (Fragment) OS=Apis mellifera OX=7460 GN=Twld1 PE=2 SV=1		0	FALSE	72.876	26	4	501	3	331	30.5	9.23	56.73	83.6	90.89	117.73	98.24	8.91		50.99	10.31	24.39	170.63		278.03	21.89	17.13	33.51	45.46	42.86	73.11	62.72	4	4	4	4	4	2		4	2	4	4		4	2
FALSE	High	Master Protein	E2IFU8	Tweedle motif cuticular protein 2 (Fragment) OS=Apis mellifera OX=7460 GN=Twdl2 PE=2 SV=2		0	FALSE	62.009	52	6	356	5	185	20.1	8.48	25.25	24.23	40.66	28.63	60.98	14.59		26.91	19.63	26.84	54.65		88.72	24.89	21.09	20.37	16.42	37.25	25.17	43.32	3	4	5	5	4	3		3	3	3	5		2	3
FALSE	High	Master Protein	A0A088A7V6	TYR_PHOSPHATASE_2 domain-containing protein OS=Apis mellifera OX=7460 GN=cdc14 PE=4 SV=1		0	FALSE	6.763	4	2	2	2	588	66.9	9.36					0									2.72											1									1
FALSE	High	Master Protein	A0A088A7J8	TYR_PHOSPHATASE_2 domain-containing protein OS=Apis mellifera OX=7460 GN=Plip PE=4 SV=1		0	FALSE	5.953	8	1	2	1	192	22.7	8.68							0									0											1
FALSE	High	Master Protein	A0A088AVW5	TYR_PHOSPHATASE_2 domain-containing protein OS=Apis mellifera OX=7460 PE=4 SV=1		0	FALSE	39.763	55	7	14	7	172	19.8	8.31	4.19		6.63	0		0	2.31					6.78	2.46	2.75							2		1	1		1	1					4	2	1
FALSE	High	Master Protein	A0A087ZQN7	Tyrosine-protein kinase OS=Apis mellifera OX=7460 GN=LOC412588 PE=3 SV=1		0	FALSE	37.252	17	7	21	6	505	57.7	6.43					2.13		2.26				5.33	1.96	1.62	8.12		3.22	8.12	4.71	5.87	1.71					1		1				2	1	3	3
FALSE	High	Master Protein	A0A088AMC1	Tyrosine--tRNA ligase OS=Apis mellifera OX=7460 GN=Aats-tyr PE=3 SV=1		0	FALSE	92.91	45	19	89	19	522	58.7	6	38.44	1.69	3.45	16.06	2.01	20.88	4.81	7.84	6.5	1.8	12.07	2.41	5.1	29.87		26.12	2.71	7.31	14.87	4.59	8	1	1	6	1	6	2	3	2	1	6	4	4	9
FALSE	High	Master Protein	A0A088A004	Tyrosine--tRNA ligase OS=Apis mellifera OX=7460 PE=3 SV=1		0.001	FALSE	4.601	5	2	4	2	441	50.8	8.91																	0	0	0
FALSE	High	Master Protein	A0A088A1S9	UAS domain-containing protein OS=Apis mellifera OX=7460 PE=4 SV=1		0	FALSE	12.939	10	3	6	3	409	47.8	6.07	5.04	3.25	3.08														1.69				2	2	1
FALSE	High	Master Protein	A0A088AVS9	UBA_e1_C domain-containing protein OS=Apis mellifera OX=7460 GN=Uba1 PE=3 SV=1		0	FALSE	291.181	46	35	194	35	1049	117	5.6	154.31	2.69		1.62	2.48	35.85	9.6	1.85		2.26	19.47	15.3	16.5	83.7		110.21	15.83	5.73	30.46	3.9	28	1		2	1	13	4	2		2	9	8	8	17
FALSE	High	Master Protein	A0A088A361	Ubiquinone biosynthesis monooxygenase COQ6, mitochondrial OS=Apis mellifera OX=7460 GN=LOC412426 PE=3 SV=1		0	FALSE	55.092	35	11	44	11	474	52.5	7.97	10.32	2.38	4.52	2.27	2.97	9.44	4.9	9.82	2.17				3.62	9		12.24	2.57	12.78	18.37	3.11	4	1	2	2	2	2	2	3	2				3	3
FALSE	High	Master Protein	A0A087ZYC5	Ubiquinone biosynthesis O-methyltransferase, mitochondrial OS=Apis mellifera OX=7460 GN=LOC412082 PE=3 SV=1		0	FALSE	11.29	12	2	3	2	286	31.8	8.65													0	4.35		0																	1	1
FALSE	High	Master Protein	A0A088A9U4	Ubiquinone biosynthesis protein OS=Apis mellifera OX=7460 PE=3 SV=1		0	FALSE	40.732	15	8	41	8	689	79.9	8.21	6.16		8.2	5.28		5.94	12.4	8.36	6.71		3.74	4.72	1.66	3.62		13.81	4.14	10.37	9.7	6.42	2		4	2		2	4	2	2		1	3	2	2
FALSE	High	Master Protein	A0A088A5Z8	Ubiquitin carboxyl-terminal hydrolase OS=Apis mellifera OX=7460 GN=faf PE=3 SV=1		0	FALSE	14.899	2	4	4	4	2588	294.6	6.14													0	5.08		0																	1	2
FALSE	High	Master Protein	A0A087ZQN5	Ubiquitin carboxyl-terminal hydrolase OS=Apis mellifera OX=7460 GN=LOC411572 PE=3 SV=1		0	FALSE	42.047	21	7	17	7	498	56.4	5.49	16.65	0				1.67		1.98	2.58					5.46		11.75			3.18		5	1				1		1	1					2
FALSE	High	Master Protein	A0A088A052	Ubiquitin carboxyl-terminal hydrolase OS=Apis mellifera OX=7460 GN=LOC552324 PE=3 SV=1		0	FALSE	72.982	25	12	40	12	802	91.4	5.67	20.34				2.76	8.31	1.98	6.48	2.11		2.23	0	2.42	10.79		19.18		6.28	5.23	2.42	5				1	4	1	3	1		1	1	1	3
FALSE	High	Master Protein	A0A088ADV0	Ubiquitin carboxyl-terminal hydrolase OS=Apis mellifera OX=7460 GN=Uch PE=3 SV=1		0	FALSE	68.948	52	8	33	8	234	26.2	5.01	40.47			3.53	0	2.57	2.33	0			3.9		4.61	5.67		31.23		0	3.56		7			1	1	1	1	1			1		1	1
FALSE	High	Master Protein	A0A088ABX5	UBIQUITIN_CONJUGAT_2 domain-containing protein OS=Apis mellifera OX=7460 GN=LOC409225 PE=3 SV=1		0.01	FALSE	2.875	6	1	1	1	181	20.5	8.03						2.49																				1
FALSE	High	Master Protein	A0A088A509	UBIQUITIN_CONJUGAT_2 domain-containing protein OS=Apis mellifera OX=7460 GN=LOC409920 PE=4 SV=1		0	FALSE	30.581	34	5	15	5	144	16.3	7.14	10.56										2.8	4.97	2.76	6.23		7.02					4										1	3	2	2
FALSE	High	Master Protein	A0A087ZP05	UBIQUITIN_CONJUGAT_2 domain-containing protein OS=Apis mellifera OX=7460 GN=LOC413253 PE=4 SV=1		0	FALSE	14.383	16	2	5	2	230	26.3	7.03	3.4						0							2.96		3.51	2.81				1						1							1
FALSE	High	Master Protein	A0A088A1Z8	UBIQUITIN_CONJUGAT_2 domain-containing protein OS=Apis mellifera OX=7460 GN=LOC413822 PE=3 SV=1		0	FALSE	5.511	14	1	2	1	158	18.2	8.56		2.6		2.42																		1		1
FALSE	High	Master Protein	A0A088AG51	UBIQUITIN_CONJUGAT_2 domain-containing protein OS=Apis mellifera OX=7460 GN=LOC724793 PE=3 SV=1		0	FALSE	20.143	24	2	32	2	147	16.7	7.3	4.83	2.32	2.04	2.08	2.64	3.38	4.43	6.73	9.78	2.35		2.25	1.81			5.81	2.06	8.94	5.08	6.01	1	1	1	1	1	1	2	2	2	1		1	1
FALSE	High	Master Protein	A0A088A3B1	UBIQUITIN_CONJUGAT_2 domain-containing protein OS=Apis mellifera OX=7460 GN=Ubc13 PE=3 SV=1		0	FALSE	41.603	46	5	49	5	151	17.2	6.01	17.74	2.36	0	15.41		10.5	1.97	2.27	1.6	4.73	8.74	5.97	5.96	20.69	0	15.34		2.53	1.96	1.99	5	1	1	4		4	1	1	1	2	1	2	3	3
FALSE	High	Master Protein	A0A088ALQ4	UBIQUITIN_CONJUGAT_2 domain-containing protein OS=Apis mellifera OX=7460 PE=3 SV=1		0	FALSE	16.062	28	2	2	2	167	18.5	4.79	8.01																				2
FALSE	High	Master Protein	A0A088A4Q8	Ubiquitin-fold modifier 1 OS=Apis mellifera OX=7460 GN=726196 PE=3 SV=1		0.003	FALSE	4.012	17	1	1	1	87	9.4	9.52				1.71																				1
FALSE	High	Master Protein	A0A088A321	Ubiquitin-like domain-containing protein OS=Apis mellifera OX=7460 GN=e(y)2 PE=4 SV=1		0.003	FALSE	4.102	18	1	3	1	77	8.7	7.25				2.28					0							3.18								1					1
FALSE	High	Master Protein	A0A088AN20	Ubiquitin-like domain-containing protein OS=Apis mellifera OX=7460 GN=RpL40 PE=4 SV=1		0	FALSE	46.83	41	5	282	1	128	14.7	9.83	89.61		32.35	33.48	41.4	19.06	6.55	13.68	38.3	15.65	36.55	11.49	8.68	74.96	3.82	62.36	4.01	39.31	30.11	17.73	5		4	4	4	5	3	4	5	3	5	4	3	5
FALSE	High	Master Protein	A0A088AVY1	Ubiquitin-like domain-containing protein OS=Apis mellifera OX=7460 GN=RpS27A PE=4 SV=1		0	FALSE	50.697	46	6	161	2	156	17.9	9.8	34.41		10.66	12.35	14.19	11.83	10.83	6.25	11.61	4.19	24.87	9.25	8.68	65.55	3.82	28.86	11.05	11.75	17.39	9.2	4		3	3	3	4	4	3	4	2	4	3	2	4
FALSE	High	Master Protein	A0A087ZRU4	Ubiquitin-like domain-containing protein OS=Apis mellifera OX=7460 PE=4 SV=1		0	FALSE	85.645	13	10	49	10	1310	144	5.39	32.13	2.01	2.14	10.58	7.73	11.99	7.85	4.17	0	2.25	2.01			15.81		22.18	7.06	9.85	11.38	9.03	4	1	2	3	2	1	2	2	1	2	1			4
FALSE	High	Master Protein	A0A088ARA7	Ubiquitin-like domain-containing protein OS=Apis mellifera OX=7460 PE=4 SV=1		0	FALSE	6.987	2	2	5	2	920	105.4	8.37							1.68	0					1.97			0			0								1	1					1
FALSE	High	Master Protein	A0A088A3N0	U-box domain-containing protein OS=Apis mellifera OX=7460 PE=4 SV=1		0	FALSE	9.148	4	2	5	2	1022	116.6	5.68	4.7															0		0			2
FALSE	High	Master Protein	A0A088AK76	UBR-type domain-containing protein OS=Apis mellifera OX=7460 GN=LOC412281 PE=4 SV=1		0	FALSE	20.672	1	5	5	5	5421	604.7	6.32	1.86													2.4		2.76			0		1													1
FALSE	High	Master Protein	A0A088ANQ3	UBX domain-containing protein OS=Apis mellifera OX=7460 GN=Gint3 PE=4 SV=1		0	FALSE	12.761	4	1	14	1	441	51	8.06	7.13				0	0										4.84		0	0	0	1				1	1
FALSE	High	Master Protein	A0A087ZN16	UBX domain-containing protein OS=Apis mellifera OX=7460 GN=LOC408433 PE=4 SV=1		0	FALSE	83.211	32	13	61	13	521	58.5	5.52	12.91	0		4.38	5.71	2.75	18.79	2.67		3	14.32	6.03	0	23.52		12.35	19.18	12.13	6.03	2.74	4	2		2	2	1	6	1		1	8	4	1	6
FALSE	High	Master Protein	A0A088A559	UDENN domain-containing protein OS=Apis mellifera OX=7460 GN=LOC724330 PE=4 SV=1		0.001	FALSE	4.834	4	1	1	1	352	40.4	6.99	2.79																				1
FALSE	High	Master Protein	A0A088AN42	UDP-glucose 4-epimerase OS=Apis mellifera OX=7460 GN=LOC411633 PE=3 SV=1		0	FALSE	19.539	10	3	17	3	363	40.9	6.79	10.44					2.37			1.83					5.9		8.38		4.35	8.04	2.06	2					1			1					2
FALSE	High	Master Protein	A0A088A7I2	UDP-glucuronosyltransferase OS=Apis mellifera OX=7460 GN=LOC409203 PE=3 SV=1		0	FALSE	357.127	52	25	1134	25	526	60.2	8.81	217.3	253.46	155.31	145.07	142.38	151.59	277.22	96.86	61.47	31.2	108.11	231.29	107.52	242.54	16.39	184.4	289.91	179.82	202.65	123.09	20	22	19	19	18	20	23	14	12	8	16	19	14	17
FALSE	High	Master Protein	A0A088A7I0	UDP-glucuronosyltransferase OS=Apis mellifera OX=7460 GN=LOC727593 PE=3 SV=1		0	FALSE	175.613	44	16	292	16	523	59.7	7.99	82.56	50.86	34.43	38.2	51.02	49.64	69.93	42.95	9.99	5.36	10.39	16.93	2.31	21.93	0	82.26	96.7	53.98	73.86	13.14	10	10	11	11	8	7	11	9	4	3	2	5	1	6
FALSE	High	Master Protein	A0A087ZYR9	UDPGT domain-containing protein OS=Apis mellifera OX=7460 GN=LOC408788 PE=3 SV=1		0	FALSE	93.408	40	15	80	15	544	62.7	9.01	35.5		0		2.84	0	2.1	7.35	2.32				16.25	2.91		12.33	66.1	2.11	8.31		9		1		3	1	1	5	2				7	1
FALSE	High	Master Protein	D3XL69	Uncharacterized protein (Fragment) OS=Apis mellifera OX=7460 PE=2 SV=1		0	FALSE	22.348	27	2	3	1	179	18.9	4.78												6.38		4.09																		2		1
FALSE	High	Master Protein	D3XL80	Uncharacterized protein (Fragment) OS=Apis mellifera OX=7460 PE=2 SV=1	Apis mellifera clone AMDH7651 hypothetical protein mRNA, partial cds	0.006	FALSE	3.363	20	1	1	1	88	9.6	9.19													2.43																				1
FALSE	High	Master Protein	T0LC03	Uncharacterized protein (Fragment) OS=Nosema apis BRL 01 OX=1037528 GN=NAPIS_ORF00603 PE=4 SV=1		0.009	FALSE	2.939	2	1	12	1	402	47.8	8.75	0	0	0			0	1.64					0		0			0	0	0		1	1	1			1	1					1		1
FALSE	High	Master Protein	A0A0K1Y8S7	Uncharacterized protein OS=Apis mellifera filamentous virus OX=1100043 GN=AmFV_0220 PE=4 SV=1		0.01	FALSE	2.872	1	2	10	2	1964	223.7	6.67			0			2.12			0					0			0	2.27	3.75				1			1			1					1
FALSE	High	Master Protein	A0A088ATW9	Uncharacterized protein OS=Apis mellifera OX=7460 GN=100302106 PE=4 SV=1	Apis mellifera uncharacterized LOC100302106 (LOC100302106), transcript variant 1, mRNA	0	FALSE	7.645	43	2	12	2	61	6.9	9.13								3.31			7.69	1.64	5.03	2.07														1			1	1	1	1
FALSE	High	Master Protein	A0A088AG24	Uncharacterized protein OS=Apis mellifera OX=7460 GN=100576125 PE=4 SV=1		0	FALSE	7.122	3	1	6	1	425	49.2	8.29	3.24	2.37	0				2.7										2.92	2.65			1	1	1				1
FALSE	High	Master Protein	A0A088AT98	Uncharacterized protein OS=Apis mellifera OX=7460 GN=100576132 PE=4 SV=1		0	FALSE	6.919	2	1	1	1	786	90	7.28														2.42																				1
FALSE	High	Master Protein	A0A088ARD9	Uncharacterized protein OS=Apis mellifera OX=7460 GN=100576140 PE=4 SV=1		0.002	FALSE	4.539	5	1	1	1	212	24.3	7.91	2.54																				1
FALSE	High	Master Protein	A0A087ZVL8	Uncharacterized protein OS=Apis mellifera OX=7460 GN=100576161 PE=4 SV=1		0	FALSE	17.203	44	1	18	1	89	9.5	8.1	2.01				13.34	7.69		0		7.7						5.83				7.08	1				1	1		1		1
FALSE	High	Master Protein	A0A088A3R4	Uncharacterized protein OS=Apis mellifera OX=7460 GN=100576174 PE=4 SV=1		0	FALSE	7.381	16	2	6	2	155	18.1	6.16			1.78			2.77		2.08						2.9			2.06	2.33					1			1		1						1
FALSE	High	Master Protein	A0A088AAC3	Uncharacterized protein OS=Apis mellifera OX=7460 GN=100576193 PE=4 SV=1		0	FALSE	70.249	44	4	148	4	251	27.2	9.33	26.22	20.52	11.98	6.83	58.08	32.83	4.2	28.39	34.49	30.28	2.01	2.06	0	38.57	16.43	27.35	20.19	66.85	26.28	60.02	2	1	2	1	4	3	1	2	2	3	2	1	1	4
FALSE	High	Master Protein	A0A088AV63	Uncharacterized protein OS=Apis mellifera OX=7460 GN=100576254 PE=4 SV=1		0.009	FALSE	2.897	7	1	1	1	206	23.1	7.06											0																				1
FALSE	High	Master Protein	A0A088AJ60	Uncharacterized protein OS=Apis mellifera OX=7460 GN=100576258 PE=4 SV=1		0	FALSE	14.87	22	3	5	3	105	11.7	6.28	0							2.62										4.64		0	1							1
FALSE	High	Master Protein	A0A087ZRG0	Uncharacterized protein OS=Apis mellifera OX=7460 GN=100576404 PE=4 SV=1		0	FALSE	6.032	3	2	6	2	909	104.3	7.68	6.67					2.12										1.68		2.29			2					1
FALSE	High	Master Protein	A0A088AGJ9	Uncharacterized protein OS=Apis mellifera OX=7460 GN=100576418 PE=4 SV=1	PREDICTED: Apis mellifera tetra-peptide repeat homeobox protein 1 (LOC100576418), mRNA	0	FALSE	30.529	28	6	17	6	360	39.3	9.1				4.16	8.26								0			0		10.54	7.33					4	2								1
FALSE	High	Master Protein	A0A088ACD4	Uncharacterized protein OS=Apis mellifera OX=7460 GN=100576467 PE=4 SV=1	PREDICTED: Apis mellifera 14 kDa phosphohistidine phosphatase (LOC100576467), mRNA	0.001	FALSE	4.633	16	2	2	2	152	17.2	7.05				0									0											1									1
FALSE	High	Master Protein	A0A087ZY50	Uncharacterized protein OS=Apis mellifera OX=7460 GN=100576515 PE=4 SV=1	PREDICTED: Apis mellifera protein KRTCAP2 homolog (LOC100576515), transcript variant X1, mRNA	0.005	FALSE	3.569	14	1	1	1	131	14.6	9.72																	2.94
FALSE	High	Master Protein	A0A088A704	Uncharacterized protein OS=Apis mellifera OX=7460 GN=100576748 PE=4 SV=1		0	FALSE	58.93	50	5	91	5	127	14.3	9.09	20.47	3.48	2.52		31.04	12.3		27.56	26.7	21.96	3.73		3.07	6.7	10.38	13.06	10.59	24.14	10.93	39.22	3	1	1		3	3		3	4	4	2		1	1
FALSE	High	Master Protein	A0A088A017	Uncharacterized protein OS=Apis mellifera OX=7460 GN=100576817 PE=4 SV=1		0	FALSE	8.924	1	1	1	1	1091	123.5	7.14														3.04																				1
FALSE	High	Master Protein	A0A087ZTF9	Uncharacterized protein OS=Apis mellifera OX=7460 GN=100576930 PE=4 SV=1		0	FALSE	8.229	25	2	4	2	190	22.2	9.55							2.13							3.67		2.12			2.36								1							1
FALSE	High	Master Protein	A0A088AHM1	Uncharacterized protein OS=Apis mellifera OX=7460 GN=100576945 PE=4 SV=1	PREDICTED: Apis mellifera uncharacterized LOC100576945 (LOC100576945), mRNA	0	FALSE	23.443	41	4	13	4	133	15.5	8.88		2.08	0					2.75				0		14.05			2.41	0				1	1					2				2		4
FALSE	High	Master Protein	A0A088AJX2	Uncharacterized protein OS=Apis mellifera OX=7460 GN=100577002 PE=3 SV=1	PREDICTED: Apis mellifera multiple inositol polyphosphate phosphatase 1 (LOC100577002), mRNA	0	FALSE	51.032	25	10	49	10	466	55.2	5.68	4.69	2.33	7.78		0	9.63	15.7	8.31	1.96	0	2.79	4.41	2.37	2.59	1.63		20.28	11.27	3	5.48	2	2	5		1	3	4	4	1	1	2	2	2	1
FALSE	High	Master Protein	A0A088ACU4	Uncharacterized protein OS=Apis mellifera OX=7460 GN=100577043 PE=4 SV=1		0	FALSE	48.903	16	9	128	9	474	54.4	9.64	15.76		4.24	3.98	45.46	12.02		12.58	16.15	15.68				13.67	3.66	9.13		27.58	13.09	55.87	4		2	2	8	2		3	3	4				5
FALSE	High	Master Protein	A0A088A0K9	Uncharacterized protein OS=Apis mellifera OX=7460 GN=100577140 PE=4 SV=1	PREDICTED: Apis mellifera UDP-glucuronosyltransferase 2B19 (LOC100577140), transcript variant X1, mRNA	0.001	FALSE	4.732	3	1	1	1	495	56.9	6.3																	2.61
FALSE	High	Master Protein	A0A088AEG2	Uncharacterized protein OS=Apis mellifera OX=7460 GN=100577143 PE=4 SV=1		0	FALSE	41.16	35	5	37	5	144	16.9	4.93	2.56		38.57		2.76			12.55	4.81						2.57	7.06		5.4			2		5		1			2	1
FALSE	High	Master Protein	A0A088AR19	Uncharacterized protein OS=Apis mellifera OX=7460 GN=100577279 PE=4 SV=1		0	FALSE	9.801	5	1	1	1	307	35.8	7.3														3.84																				1
FALSE	High	Master Protein	A0A088ACR6	Uncharacterized protein OS=Apis mellifera OX=7460 GN=100577341 PE=4 SV=1	PREDICTED: Apis mellifera uncharacterized LOC100577341 (LOC100577341), mRNA	0	FALSE	7.454	20	2	4	2	107	13.2	9.99											2.57			2.99		0															1			1
FALSE	High	Master Protein	A0A088A5S4	Uncharacterized protein OS=Apis mellifera OX=7460 GN=100577378 PE=4 SV=1	PREDICTED: Apis mellifera galactokinase (LOC100577378), mRNA	0	FALSE	16.304	18	4	7	4	393	43.2	6.34	7.62															8.08					3
FALSE	High	Master Protein	A0A088A5P8	Uncharacterized protein OS=Apis mellifera OX=7460 GN=100577504 PE=4 SV=1		0	FALSE	90.58	32	16	47	16	788	88.1	5.29		17.48		2.33		5.07	22.11				17.27	16.1	2	10.92			15.42	4.48	4.77	3.41		7		1		3	6				8	6	1	3
FALSE	High	Master Protein	A0A088AG71	Uncharacterized protein OS=Apis mellifera OX=7460 GN=100577527 PE=4 SV=1	PREDICTED: Apis mellifera uncharacterized LOC100577527 (LOC100577527), mRNA	0	FALSE	71.731	58	6	187	6	145	15.8	7.5	23.55	8.34	145.74	48.17	8.87	12.32		54.79	50.93	5.7	10.78	5.76	23.29	13.98	2.32	23.07	16.05	28.59	11.22	2.45	2	2	6	5	2	3		4	4	2	2	2	4	3
FALSE	High	Master Protein	A0A088ABN6	Uncharacterized protein OS=Apis mellifera OX=7460 GN=100577578 PE=4 SV=1		0	FALSE	5.98	2	1	1	1	599	65.7	7.39	2.97																				1
FALSE	High	Master Protein	A0A087ZXG6	Uncharacterized protein OS=Apis mellifera OX=7460 GN=100577641 PE=4 SV=1	PREDICTED: Apis mellifera protein snakeskin (LOC100577641), mRNA	0	FALSE	31.848	28	4	16	4	162	18	5.74	2.03			2.17				2.36						42.23	5						1			1				1						3
FALSE	High	Master Protein	A0A088AUM9	Uncharacterized protein OS=Apis mellifera OX=7460 GN=100577661 PE=4 SV=1		0.009	FALSE	3.022	3	1	9	1	229	27	9.03	2.15	1.65	1.78		2.07			1.92	2.17							0		1.87	2.15		1	1	1		1			1	1
FALSE	High	Master Protein	A0A088A065	Uncharacterized protein OS=Apis mellifera OX=7460 GN=100577702 PE=3 SV=1	PREDICTED: Apis mellifera 39S ribosomal protein L11, mitochondrial (LOC100577702), mRNA	0	FALSE	16.73	22	2	16	2	196	21.9	9.95	8.1				3.11	3.02	4.1	3.02								8.68	2.62	5.15	4.89		2				1	1	1	1
FALSE	High	Master Protein	A0A088A7M1	Uncharacterized protein OS=Apis mellifera OX=7460 GN=100577870 PE=4 SV=1		0	FALSE	32.953	29	5	51	3	201	23	8.98	7.89	10.26	3.25		2.97	2.85	4.86	12.67	4.99		11.18	15.47	1.96	8.48		15.66	8.73	8.03	2.36	8.48	2	3	2		1	1	2	3	2		3	3	1	2
FALSE	High	Master Protein	A0A088AHC2	Uncharacterized protein OS=Apis mellifera OX=7460 GN=100577981 PE=4 SV=1	PREDICTED: Apis mellifera insulin-like growth factor-binding protein complex acid labile subunit (LOC100577981), mRNA	0.009	FALSE	2.98	3	1	1	1	773	88.2	8.65																		0
FALSE	High	Master Protein	A0A088ANF1	Uncharacterized protein OS=Apis mellifera OX=7460 GN=100578006 PE=4 SV=1	PREDICTED: Apis mellifera inorganic pyrophosphatase (LOC100578006), mRNA	0	FALSE	41.046	33	7	14	7	332	37.6	7.03											7.99	6.68	5.97	11.66																	3	3	4	4
FALSE	High	Master Protein	A0A087ZWD9	Uncharacterized protein OS=Apis mellifera OX=7460 GN=100578159 PE=4 SV=1		0	FALSE	8.962	2	2	5	2	1244	144.2	8.94	3.48	0														0	3.17				2	1
FALSE	High	Master Protein	A0A087ZVW4	Uncharacterized protein OS=Apis mellifera OX=7460 GN=100578201 PE=3 SV=1		0.006	FALSE	3.372	1	1	1	1	1500	173.2	8.81														0																				1
FALSE	High	Master Protein	A0A088AEY6	Uncharacterized protein OS=Apis mellifera OX=7460 GN=100578218 PE=4 SV=1	PREDICTED: Apis mellifera NADH dehydrogenase [ubiquinone] 1 alpha subcomplex assembly factor 2 (LOC100578218), transcript variant X2, mRNA	0	FALSE	13.289	26	3	4	3	149	18.1	9.45				4.72				3.58						2.17										2				1						1
FALSE	High	Master Protein	A0A087ZXS1	Uncharacterized protein OS=Apis mellifera OX=7460 GN=100578392 PE=4 SV=1		0	FALSE	19.606	26	5	13	5	216	24.4	7.43				1.85					3.65				13.97											2					2				5
FALSE	High	Master Protein	A0A088ASJ0	Uncharacterized protein OS=Apis mellifera OX=7460 GN=100578560 PE=4 SV=1		0.003	FALSE	4.115	6	1	2	1	142	16.9	8.81	2.39															2.74					1
FALSE	High	Master Protein	A0A087ZX19	Uncharacterized protein OS=Apis mellifera OX=7460 GN=100578624 PE=3 SV=1		0	FALSE	55.341	54	12	32	12	306	34.4	7.83	6.52	2.04		1.61		2.51	6.44				10.78	0	3.77	3.35		21.83			6.83		3	1		2		2	3				4	1	3	2
FALSE	High	Master Protein	A0A087ZUS8	Uncharacterized protein OS=Apis mellifera OX=7460 GN=100578625 PE=4 SV=1		0	FALSE	26.103	34	4	9	4	166	17.7	9.55													22.06																				4
FALSE	High	Master Protein	A0A088A0S1	Uncharacterized protein OS=Apis mellifera OX=7460 GN=100578631 PE=4 SV=1		0.005	FALSE	3.816	2	1	3	1	878	98.6	9.44	0															0					1
FALSE	High	Master Protein	A0A088AHX1	Uncharacterized protein OS=Apis mellifera OX=7460 GN=100578731 PE=4 SV=1		0	FALSE	22.97	24	5	5	5	246	28	9.06			7.28																				5
FALSE	High	Master Protein	A0A088AUA5	Uncharacterized protein OS=Apis mellifera OX=7460 GN=100578782 PE=4 SV=1	PREDICTED: Apis mellifera cytochrome b-c1 complex subunit 9 (LOC100578782), transcript variant X2, mRNA	0	FALSE	31.727	71	4	57	4	58	6.9	8.5	3.29	10.45	12.49	8.94	6.98	5.32	6.14	3.47	7.65	5.89	2.84	2.4	8.95	5.66	2.31	7.41	7.91	9.29	8.29	8.91	1	1	2	2	1	1	1	1	1	1	1	1	1	2
FALSE	High	Master Protein	A0A087ZWE8	Uncharacterized protein OS=Apis mellifera OX=7460 GN=100578976 PE=4 SV=1		0	FALSE	12.524	7	2	19	2	370	42.2	8.63	8.07	1.89			0	2.75	2.62		2.3							5.39	5.39	9.33	2.35		1	1			1	2	2		1
FALSE	High	Master Protein	A0A088A5K7	Uncharacterized protein OS=Apis mellifera OX=7460 GN=100579019 PE=4 SV=1	PREDICTED: Apis mellifera probable salivary secreted peptide (LOC100579019), mRNA	0	FALSE	12.501	17	2	37	2	134	15	10.52			14.24	2.01		2.33							88.41										2	1		1							2
FALSE	High	Master Protein	A0A088AF65	Uncharacterized protein OS=Apis mellifera OX=7460 GN=102653784 PE=4 SV=1		0	FALSE	5.035	5	1	12	1	223	24.6	8.84					5.79	2.84		2.95	2.69	5.2					2.01		2.24	2.97		5.36					1	1		1	1	1
FALSE	High	Master Protein	A0A088AVC5	Uncharacterized protein OS=Apis mellifera OX=7460 GN=102653862 PE=4 SV=1	PREDICTED: Apis mellifera NADH dehydrogenase [ubiquinone] 1 alpha subcomplex subunit 13 (LOC102653862), mRNA	0	FALSE	40.047	38	5	66	5	152	17.8	7.49	18.64	7.1	12.77	3.6	10	11.76	15.7	28.67	5.88	2.89	2.7	3.9	8.52	16.33	4	21.06	7.5	13.04	8.32	6.1	3	2	2	1	1	3	4	4	2	1	1	1	2	2
FALSE	High	Master Protein	A0A088AND9	Uncharacterized protein OS=Apis mellifera OX=7460 GN=102654271 PE=4 SV=1	PREDICTED: Apis mellifera transcriptional regulator ATRX homolog (LOC102654271), mRNA	0	FALSE	67.282	28	7	15	7	287	33.4	9.14	16.66				2.09						2.99	0		25.72	0						4				1						1	1		5
FALSE	High	Master Protein	A0A087ZNY8	Uncharacterized protein OS=Apis mellifera OX=7460 GN=102654371 PE=4 SV=1	PREDICTED: Apis mellifera pro-resilin-like (LOC102654371), mRNA	0	FALSE	5.622	4	1	2	1	299	31	8.13													2.27																				1
FALSE	High	Master Protein	A0A088A3M2	Uncharacterized protein OS=Apis mellifera OX=7460 GN=102654555 PE=4 SV=1	PREDICTED: Apis mellifera leucine-rich repeat-containing protein 59 (LOC102654555), transcript variant X2, mRNA	0	FALSE	7.294	4	1	1	1	319	36.9	9.14														3.61																				1
FALSE	High	Master Protein	A0A087ZX74	Uncharacterized protein OS=Apis mellifera OX=7460 GN=102654955 PE=4 SV=1	PREDICTED: Apis mellifera ATP synthase subunit b, mitochondrial (LOC102654955), mRNA	0	FALSE	201.483	68	20	698	20	238	27.8	7.43	119.53	90.1	108.58	46.05	93.2	65.94	114.2	110.4	80.86	38.84	68.26	74.73	154.29	61.01	21.29	76.74	92.47	102.76	96.49	75.37	14	13	16	12	14	11	15	16	11	9	9	10	11	7
FALSE	High	Master Protein	A0A087ZT74	Uncharacterized protein OS=Apis mellifera OX=7460 GN=102654987 PE=4 SV=1	PREDICTED: Apis mellifera ras-related protein Rab-1A (LOC102654987), mRNA	0	FALSE	106.998	75	13	301	11	206	23.1	5.68	57.77	50.05	30.2	40.44	37.72	40.94	47.81	38.68	18.02	19.76	35.6	29.08	12.55	116.45	3.6	69.61	55.77	37.86	33.37	30.05	10	8	9	8	6	6	9	6	5	3	5	4	6	6
FALSE	High	Master Protein	A0A088AHX9	Uncharacterized protein OS=Apis mellifera OX=7460 GN=102656107 PE=4 SV=1		0	FALSE	9.898	8	2	2	2	359	41.7	5.6														3.36																				2
FALSE	High	Master Protein	A0A088A5E0	Uncharacterized protein OS=Apis mellifera OX=7460 GN=102656491 PE=4 SV=1	PREDICTED: Apis mellifera signal peptidase complex subunit 1 (LOC102656491), mRNA	0	FALSE	17.351	31	2	16	2	95	11	9.94	7.22	2.74					0							8.36	0	8.42	6.37	3.46	5.84		1	1					1							1
FALSE	High	Master Protein	A0A087ZWD6	Uncharacterized protein OS=Apis mellifera OX=7460 GN=102656587 PE=4 SV=1	PREDICTED: Apis mellifera ras-related protein Ral-a (LOC102656587), transcript variant X1, mRNA	0	FALSE	48.484	41	8	91	8	201	22.9	7.88	16	10.66	4.95	5.96	7.37	9.41	11.85	4.37	0	0	7.67	8.96	4.47	24.56	0	12.59	12.81	9.95	5.08	4.04	5	4	3	3	2	4	4	2	1	2	2	3	2	3
FALSE	High	Master Protein	A0A088AHD0	Uncharacterized protein OS=Apis mellifera OX=7460 GN=102656594 PE=4 SV=1		0	FALSE	46.782	37	7	59	7	173	19.1	7.15	8.44	2.54	2.09	2.31	3.19		14.03		1.8	0	4.51		29.99	4.96		0	5.61	1.72	2.89	2.58	3	2	1	2	2		5		2	1	2		5	2
FALSE	High	Master Protein	A0A088A1K6	Uncharacterized protein OS=Apis mellifera OX=7460 GN=107963960 PE=4 SV=1		0	FALSE	7.497	5	1	1	1	312	35.1	8.72											2.8																				1
FALSE	High	Master Protein	A0A088AN83	Uncharacterized protein OS=Apis mellifera OX=7460 GN=107964351 PE=4 SV=1	PREDICTED: Apis mellifera 60S ribosomal protein L7 (LOC107964351), mRNA	0	FALSE	132.924	51	16	238	16	261	30.6	10.99	57.15	29.39	7.05	13.57	36.01	25.38	36.96	21.8	10.38	11.44	14.66	11.17	15.55	63.24	3.39	48.38	41.35	29.94	42.04	21.45	8	6	3	7	7	4	8	5	5	4	6	5	5	12
FALSE	High	Master Protein	A0A087ZVD4	Uncharacterized protein OS=Apis mellifera OX=7460 GN=107964975 PE=4 SV=1	PREDICTED: Apis mellifera beta-1,3-glucan recognition protein 1 (B-gluc1), transcript variant X1, mRNA	0	FALSE	8.51	30	3	4	3	135	15.7	9.44					0															2.91					2
FALSE	High	Master Protein	A0A0B4J2M0	Uncharacterized protein OS=Apis mellifera OX=7460 GN=107964992 PE=4 SV=1	PREDICTED: Apis mellifera rho GDP-dissociation inhibitor 2 (LOC409741), transcript variant X1, mRNA	0	FALSE	14.603	17	2	5	2	205	23.5	5.31				2.69							2.4	3.88		3.44										1							1	2		1
FALSE	High	Master Protein	A0A088ARM4	Uncharacterized protein OS=Apis mellifera OX=7460 GN=107965674 PE=4 SV=1	PREDICTED: Apis mellifera 39S ribosomal protein L55, mitochondrial (LOC107965674), mRNA	0	FALSE	9.437	13	1	7	1	122	14.6	8.65	3.57					2.75	2.39						0	6.48		2.82					1					1	1						1	1
FALSE	High	Master Protein	A0A087ZN37	Uncharacterized protein OS=Apis mellifera OX=7460 GN=408429 PE=4 SV=1	PREDICTED: Apis mellifera tensin-1 (LOC408429), transcript variant X16, mRNA	0	FALSE	337.126	42	44	230	44	1617	177.7	8.16	52.22	32.92	3.82	8.54	67.66	60.3	23.28	8.64	1.87	26.07	61.78	29.78		32.23	2.2	25.08	17.97	36.86	38.33	35.18	14	13	3	6	17	20	9	4	1	12	19	15		11
FALSE	High	Master Protein	A0A088AQ87	Uncharacterized protein OS=Apis mellifera OX=7460 GN=409768 PE=4 SV=1		0	FALSE	59.829	32	9	26	9	344	38.8	6.16	6.03		0		0			0						17.9		2.81		20.02	0		2		1		1			2						4
FALSE	High	Master Protein	A0A087ZRX1	Uncharacterized protein OS=Apis mellifera OX=7460 GN=410078 PE=4 SV=1	PREDICTED: Apis mellifera echinoderm microtubule-associated protein-like 2 (LOC410078), transcript variant X9, mRNA	0	FALSE	37.223	8	7	15	7	904	100.1	7.28		0		0							3.44		5.97	16.07								1		1							3		3	4
FALSE	High	Master Protein	A0A088AFE6	Uncharacterized protein OS=Apis mellifera OX=7460 GN=413959 PE=4 SV=1	PREDICTED: Apis mellifera multidrug resistance-associated protein 4 (LOC413959), mRNA	0	FALSE	14.042	4	4	15	3	1356	154.4	7.17	6.78				2.39	1.95		4.3								2.02	1.75	4.57	1.7	0	4				1	1		1
FALSE	High	Master Protein	A0A088APU4	Uncharacterized protein OS=Apis mellifera OX=7460 GN=551215 PE=4 SV=1		0.001	FALSE	4.733	14	2	3	2	266	30.3	8.97			0		0																		1		2
FALSE	High	Master Protein	A0A087ZZZ6	Uncharacterized protein OS=Apis mellifera OX=7460 GN=552679 PE=3 SV=1		0	FALSE	30.903	21	8	18	8	501	57.7	8.31		3.93					6.61										19.35	0	2.77			3					3
FALSE	High	Master Protein	A0A087ZZ78	Uncharacterized protein OS=Apis mellifera OX=7460 GN=724481 PE=4 SV=1	PREDICTED: Apis cerana beclin-1-like protein A (LOC107996109), transcript variant X4, mRNA	0	FALSE	51.174	19	10	32	10	744	86.2	7.25	5.44				17.27	8.06				5.97	15.2	6.84				3.37		5.19	10.4	3.79	1				5	2				3	5	6
FALSE	High	Master Protein	A0A087ZY44	Uncharacterized protein OS=Apis mellifera OX=7460 GN=724708 PE=4 SV=1		0	FALSE	9.831	20	3	30	3	144	17.4	9.38	4.44	0	0		1.82	3.68	1.65	5.5	0	0				2.08		5.83	3.67	4.24	1.92	1.74	2	2	1		1	3	3	2	1	1				1
FALSE	High	Master Protein	A0A087ZV73	Uncharacterized protein OS=Apis mellifera OX=7460 GN=724873 PE=4 SV=1	PREDICTED: Apis mellifera ras-related protein Rab-7a (LOC724873), mRNA	0	FALSE	86.713	74	12	100	12	207	23.2	6.06	20.84	20.51	11.85	7.43	12.56	6.86	35.37	12.31	1.89	2.2	11.52	18.67	3.81	47.07	0	12.27	26.87	19.51	14.59		5	6	5	3	4	3	10	4	1	1	5	8	2	6
FALSE	High	Master Protein	A0A087ZTD7	Uncharacterized protein OS=Apis mellifera OX=7460 GN=725147 PE=4 SV=1		0	FALSE	7.944	29	2	21	2	56	6.6	9.82			1.87	0	4.04			0	1.69	4.75	3.68		1.68	3.69	0	2.2				3.86			1	2	1			1	1	1	1		1	1
FALSE	High	Master Protein	A0A088A042	Uncharacterized protein OS=Apis mellifera OX=7460 GN=725148 PE=4 SV=1	PREDICTED: Apis mellifera uncharacterized LOC725148 (LOC725148), transcript variant X2, mRNA	0	FALSE	108.976	59	13	72	13	301	33.9	7.97	17.09			13.25	15.54	23.5				13.82	31.93	20.14		14.78	2.24	5.25		15.64	16.16	5.26	5			5	5	6				3	7	5		4
FALSE	High	Master Protein	A0A087ZRK0	Uncharacterized protein OS=Apis mellifera OX=7460 GN=725217 PE=4 SV=1		0	FALSE	34.136	11	8	17	8	752	85.8	5.19			17.51		1.69								6.57					2.41		2.04			7		1								2
FALSE	High	Master Protein	A0A088ADR6	Uncharacterized protein OS=Apis mellifera OX=7460 GN=725645 PE=4 SV=1	PREDICTED: Apis mellifera uncharacterized LOC725645 (LOC725645), transcript variant X1, mRNA	0	FALSE	7.183	10	1	3	1	193	21.7	6.81			2.21				3.05										3.39						1				1
FALSE	High	Master Protein	A0A087ZY69	Uncharacterized protein OS=Apis mellifera OX=7460 GN=725679 PE=4 SV=1	PREDICTED: Apis mellifera sex-lethal homolog (LOC725679), transcript variant X6, mRNA	0	FALSE	27.133	21	4	17	4	283	32	5.57	8.67			0		5.34					7.06	5.67	0	10.26		6.81					3			1		2					2	2	1	2
FALSE	High	Master Protein	A0A087ZVZ6	Uncharacterized protein OS=Apis mellifera OX=7460 GN=725851 PE=3 SV=1		0	FALSE	755.535	93	34	7342	4	332	37.3	5.55	1078.89	726.76	384.92	527.51	1314.12	1225.44	677.72	389.78	448.6	480.48	3142.06	2382.35	906.8	3696.8	255.52	831.99	760.07	1383.18	1404.91	545.53	20	19	20	19	18	22	18	20	16	17	20	22	17	22
FALSE	High	Master Protein	A0A087ZVG6	Uncharacterized protein OS=Apis mellifera OX=7460 GN=726030 PE=4 SV=1	PREDICTED: Apis mellifera transmembrane protein 214-A (LOC726030), mRNA	0	FALSE	51.212	14	7	61	7	675	77.6	9.19	9.29	8.15	1.7	1.66	7.2	3.67	14.28	9.81	1.75		0	1.88		19.8		18.74	22.68	18.86	14.13	3.89	4	3	2	3	2	1	5	4	1		1	1		4
FALSE	High	Master Protein	A0A088ALR1	Uncharacterized protein OS=Apis mellifera OX=7460 GN=726199 PE=4 SV=1		0	FALSE	86.512	31	14	173	14	368	41.6	4.97	29.47	38.89	7.94	37.65	2.36	14.5	56.1	8		7.73	16.96	36.89	4.67	32.6	0	25.97	30.68	12.94	21.35	17.46	8	9	2	11	2	4	12	4		3	5	8	3	9
FALSE	High	Master Protein	A0A088AQ74	Uncharacterized protein OS=Apis mellifera OX=7460 GN=726210 PE=4 SV=1		0	FALSE	68.403	15	13	38	13	1170	131.2	8.46	16.55		2.4		7.64	22.27	0	0			7.09	0		0		9.12		9.98	5.52		4		1		3	7	1	1			3	2		1
FALSE	High	Master Protein	A0A088AI19	Uncharacterized protein OS=Apis mellifera OX=7460 GN=726273 PE=4 SV=1		0	FALSE	8.278	3	1	1	1	634	69.6	5.45																4.24
FALSE	High	Master Protein	A0A087ZR93	Uncharacterized protein OS=Apis mellifera OX=7460 GN=726703 PE=4 SV=1	PREDICTED: Apis mellifera venom acid phosphatase Acph-1 (LOC726703), transcript variant X3, mRNA	0	FALSE	43.565	20	5	49	5	410	47	5.91	12.77		13.73		14.34	16.55		23.52		5.51						3.85		34.27	3.47	9.64	2		4		4	4		5		2
FALSE	High	Master Protein	A0A088ABQ2	Uncharacterized protein OS=Apis mellifera OX=7460 GN=727106 PE=4 SV=1	PREDICTED: Apis mellifera heterogeneous nuclear ribonucleoprotein H (LOC727106), transcript variant X1, mRNA	0	FALSE	29.62	18	5	10	5	403	44.4	8.09	9.65			3.13						2.01				5.36		3.22			3.62		4			1						1				2
FALSE	High	Master Protein	A0A088A2R7	Uncharacterized protein OS=Apis mellifera OX=7460 GN=727210 PE=3 SV=1		0	FALSE	8.875	19	2	6	2	142	16.2	9.44	3.82						3.42					2.64				3.53	3.17	3.39			1						1					1
FALSE	High	Master Protein	A0A087ZSD1	Uncharacterized protein OS=Apis mellifera OX=7460 GN=727218 PE=4 SV=1		0.003	FALSE	4.026	49	1	10	1	98	9.4	9.47					2.52	0				6.78						0		2.41	2.49	2.87					1	1				1
FALSE	High	Master Protein	A0A088AW53	Uncharacterized protein OS=Apis mellifera OX=7460 GN=727261 PE=4 SV=1		0	FALSE	15.12	9	3	6	3	460	52.4	5.63	8.19					2.1	2.19										2.02				2					1	1
FALSE	High	Master Protein	A0A087ZQI2	Uncharacterized protein OS=Apis mellifera OX=7460 GN=727263 PE=4 SV=1	PREDICTED: Apis mellifera chromobox protein homolog 5 (LOC727263), mRNA	0	FALSE	37.539	24	6	43	6	333	39	9.07	20.03	4.77		2.05	8.08	2.66	5.31			1.81	1.7	0		10.6		10.85	5.2	7.66		2.19	4	2		1	2	2	3			1	2	1		2
FALSE	High	Master Protein	A0A088ADS7	Uncharacterized protein OS=Apis mellifera OX=7460 GN=727483 PE=4 SV=1	PREDICTED: Apis mellifera protein stunted (LOC727483), transcript variant X1, mRNA	0	FALSE	7.754	26	1	38	1	58	6.8	10.17	6.33	9.38	7.34	5.76	7.82	5.65	6.49	7.11	6.26	3.6		1.85	2.46	19.04	2.44	6.36	6.96	8.15	3.46	6.7	1	1	1	1	1	1	1	1	1	1		1	1	1
FALSE	High	Master Protein	A0A088AT21	Uncharacterized protein OS=Apis mellifera OX=7460 GN=Aats-arg PE=3 SV=1		0	FALSE	55.135	22	12	20	12	674	77.4	7.62	10.32					0					1.76			17.54		14.64	2.71				4					1					1			7
FALSE	High	Master Protein	A0A087ZR95	Uncharacterized protein OS=Apis mellifera OX=7460 GN=Aats-gln PE=3 SV=1	PREDICTED: Apis mellifera probable glutamine--tRNA ligase (LOC413718), transcript variant X1, mRNA	0	FALSE	48.092	15	11	22	11	776	89.1	7.02	13								3.22		0	0		7.92		19.38					6								2		1	1		4
FALSE	High	Master Protein	A0A088AKB2	Uncharacterized protein OS=Apis mellifera OX=7460 GN=Aats-gly PE=4 SV=1	PREDICTED: Apis mellifera glycine--tRNA ligase (LOC408392), mRNA	0	FALSE	111.733	40	20	62	20	740	84.3	7.56	42.37	2.03	2.97	3.25	0	10.73	7.9		3.47				1.84	23.09		23.06	0		13.33		13	2	1	3	1	3	4		1				2	6
FALSE	High	Master Protein	A0A088ANI3	Uncharacterized protein OS=Apis mellifera OX=7460 GN=Aats-ile PE=3 SV=1	PREDICTED: Apis mellifera isoleucine--tRNA ligase, cytoplasmic (LOC551629), mRNA	0	FALSE	33.439	8	8	12	8	1246	144.3	7.05	1.62	1.69					4.2		3.79		1.66			6.56		2.99					1	1					2		2		1			4
FALSE	High	Master Protein	A0A088A661	Uncharacterized protein OS=Apis mellifera OX=7460 GN=Aats-trp PE=3 SV=1	PREDICTED: Apis mellifera tryptophan--tRNA ligase, cytoplasmic (LOC727582), mRNA	0	FALSE	46.736	24	6	34	6	410	46.7	7.34	11.19	0		5.49	8.42	7.21	2.92			0	5.25	2.3		12.75		15.33	0	6.61	2.28	0	4	1		3	3	2	1			2	1	1		2
FALSE	High	Master Protein	A0A088A222	Uncharacterized protein OS=Apis mellifera OX=7460 GN=Aats-val PE=3 SV=1		0	FALSE	22.576	4	4	6	4	1149	133.6	8.16	4.75													7.52		4.61					2													2
FALSE	High	Master Protein	A0A088A1Z5	Uncharacterized protein OS=Apis mellifera OX=7460 GN=ABC10 PE=4 SV=1	PREDICTED: Apis mellifera ATP-binding cassette sub-family B member 10, mitochondrial (LOC552744), mRNA	0	FALSE	9.425	4	2	2	2	654	73	9.33	0													3.85							1													1
FALSE	High	Master Protein	A0A087ZYX4	Uncharacterized protein OS=Apis mellifera OX=7460 GN=ACSF2 PE=4 SV=1	Apis mellifera acyl-CoA synthetase family member 2 (ACSF2), mRNA	0	FALSE	17.736	7	4	7	4	637	71.8	9.31						2.34		4.99						2.35		8.86										1		2						1
FALSE	High	Master Protein	A0A087ZUB8	Uncharacterized protein OS=Apis mellifera OX=7460 GN=Adk1 PE=3 SV=1	Apis mellifera adenylate kinase 1 (Adk1), mRNA	0	FALSE	7.152	14	2	3	2	192	21.9	6.37				0							2.1								0					1							1
FALSE	High	Master Protein	A0A087ZPU6	Uncharacterized protein OS=Apis mellifera OX=7460 GN=AIF PE=4 SV=1	PREDICTED: Apis mellifera apoptosis-inducing factor 1, mitochondrial (LOC412212), mRNA	0	FALSE	129.615	36	18	208	18	661	74.3	8.51	35.71	12.25	37.6	4.48	37.58	16.23	26.43	38.38	7.56	2.52	8.81	0	2.16	35.58	2.29	35.98	25.01	51.51	18.97	15.17	8	9	12	4	10	5	10	12	6	3	5	1	4	6
FALSE	High	Master Protein	A0A088AF89	Uncharacterized protein OS=Apis mellifera OX=7460 GN=alpha-Cat PE=4 SV=1		0	FALSE	96.283	26	16	29	16	918	102.4	6.81	19.37	0			2.29	3.04			1.99					28.57		4.92		6.98		1.61	6	1			1	1			1					10
FALSE	High	Master Protein	A0A088AND4	Uncharacterized protein OS=Apis mellifera OX=7460 GN=Apd-2 PE=4 SV=1		0	FALSE	36.037	65	3	65	3	77	7.7	10.43				8.57				5.6		2.7			139.71											3				1		1			3
FALSE	High	Master Protein	A0A088AV14	Uncharacterized protein OS=Apis mellifera OX=7460 GN=Arc42 PE=3 SV=1		0	FALSE	86.428	43	13	171	13	408	44.6	8.53	39.14	17.56	3.61	9.14	6.05	25.74	31.17	9.47	7.41		33.52	18.78	37.02	23.85	1.84	46.99	27.71	25.9	41.1	14.34	8	5	2	5	2	7	7	3	2		7	6	9	5
FALSE	High	Master Protein	A0A087ZZF3	Uncharacterized protein OS=Apis mellifera OX=7460 GN=Arp1 PE=3 SV=1		0	FALSE	652.786	88	33	6379	6	376	41.8	5.48	887.76	561.44	372.34	486.4	742.82	705.99	551.4	367.62	368.4	370.48	2454.24	2053.37	730.99	3526.91	212.76	603.61	591.92	807.31	741.17	411.83	22	21	23	21	20	23	20	21	18	17	20	20	16	22
FALSE	High	Master Protein	A0A087ZPV6	Uncharacterized protein OS=Apis mellifera OX=7460 GN=ArrL3 PE=4 SV=1	PREDICTED: Apis mellifera arrestin domain-containing protein 17 (LOC724328), mRNA	0	FALSE	67.203	34	9	57	9	393	43.8	5.27	10.14	2.53	4.68	5.72	2.02	2.13	2.1	4.42	1.86		15.82	10.45	11.88	19.12	0	5.84	8.12	10.14	1.98	5.7	4	1	4	3	1	1	2	2	1		6	6	5	4
FALSE	High	Master Protein	A0A088AMG8	Uncharacterized protein OS=Apis mellifera OX=7460 GN=Atg8a PE=3 SV=1		0.009	FALSE	2.931	6	1	4	1	117	14	9.07	2.08											1.74	0	2.06							1											1	1	1
FALSE	High	Master Protein	A0A088AGJ1	Uncharacterized protein OS=Apis mellifera OX=7460 GN=Atp5i PE=4 SV=1		0	FALSE	30.555	44	5	103	5	84	9.8	9.74	8.88	11.15	11.99	2.1	7.57	2.61	7.45	10.77	8.71	6.07	14.71	13.04	11.64	7.13	2.14	6.28	10.79	6.43	8.9	7.34	2	3	4	3	1	2	2	4	3	2	2	2	3	2
FALSE	High	Master Protein	A0A088AM30	Uncharacterized protein OS=Apis mellifera OX=7460 GN=ATPsyn-Cf6 PE=4 SV=1		0	FALSE	26.232	29	4	112	4	95	11	9.41	14.59	12.17	14.25	14.55	17.22	7.06	20.61	18.79	11.26	9.38	13.51	13	13.94	5.74	4.95	11	9.12	21.18	8.51	7.13	3	3	4	3	4	3	4	3	3	3	2	2	3	2
FALSE	High	Master Protein	A0A088AKM9	Uncharacterized protein OS=Apis mellifera OX=7460 GN=baf PE=4 SV=1	PREDICTED: Apis mellifera barrier-to-autointegration factor B (LOC551625), mRNA	0	FALSE	19.321	46	3	28	3	90	10.1	5.45	10.59	10.5	7.51		4.41	3.25	12.67	4.43		2.94		2.27		6.67	2.14	3.64	8.38	9.98	4.59	4.25	1	2	1		1	1	3	1		1		1		2
FALSE	High	Master Protein	A0A088AS80	Uncharacterized protein OS=Apis mellifera OX=7460 GN=Baiap3 PE=4 SV=1	PREDICTED: Apis mellifera protein unc-13 homolog 4B (LOC408959), transcript variant X9, mRNA	0.002	FALSE	4.225	2	1	1	1	1103	127.2	6.32						2.71																				1
FALSE	High	Master Protein	A0A087ZS18	Uncharacterized protein OS=Apis mellifera OX=7460 GN=Bap55 PE=3 SV=1	PREDICTED: Apis mellifera actin-like protein 6B (LOC552824), mRNA	0.002	FALSE	4.219	4	1	1	1	440	49	5.86														2.89																				1
FALSE	High	Master Protein	A0A0B4J2N5	Uncharacterized protein OS=Apis mellifera OX=7460 GN=bel PE=3 SV=1	PREDICTED: Apis mellifera ATP-dependent RNA helicase bel (LOC408276), mRNA	0	FALSE	41.426	16	9	25	8	701	78.6	8.95	10.43			2.83		1.96	1.89			4.7	6.21	3.51		8.94		7.07	6.74	4.93			4			1		1	1			2	2	2		4
FALSE	High	Master Protein	A0A088AJ38	Uncharacterized protein OS=Apis mellifera OX=7460 GN=BRWD3 PE=4 SV=1	PREDICTED: Apis mellifera PH-interacting protein (LOC412406), mRNA	0	FALSE	5.887	1	1	1	1	1754	199.1	6.3														2.59																				1
FALSE	High	Master Protein	A0A088ASX2	Uncharacterized protein OS=Apis mellifera OX=7460 GN=bur PE=4 SV=1	PREDICTED: Apis mellifera GMP synthase [glutamine-hydrolyzing] (LOC409846), mRNA	0	FALSE	26.577	9	4	10	4	718	78.7	7.42	7.59					2.27					3.24			14.83		2.7					2					1					1			4
FALSE	High	Master Protein	A0A088AAI5	Uncharacterized protein OS=Apis mellifera OX=7460 GN=Catsup PE=4 SV=1		0	FALSE	15.36	9	3	20	3	404	45.5	6.4	0				2.52		4.57			1.61	2.62	5.5	1.82	5.98		4.79	4.52				1				1		1			1	2	2	1	2
FALSE	High	Master Protein	A0A088AGP1	Uncharacterized protein OS=Apis mellifera OX=7460 GN=Cct5 PE=3 SV=1	PREDICTED: Apis mellifera T-complex protein 1 subunit epsilon (LOC409825), mRNA	0	FALSE	128.207	47	20	89	20	544	59.4	6.02	43.09	4.72		4.94	2.71	9.2	16.42		2.42		9.27	4.29	3.84	29.72		31.42	4.6	2.52	15.88	2.5	10	3		3	1	4	9		1		5	2	4	11
FALSE	High	Master Protein	A0A0B4J2M3	Uncharacterized protein OS=Apis mellifera OX=7460 GN=Cdc42 PE=4 SV=1		0	FALSE	31.706	34	5	71	3	191	21.2	6.55	6.85	6.33	7.38	10.25	6.05	3.91	9.21	11.14	6.15	4.57	3.39	1.78	0	5.98		7.65	7.55	10.09	7.21	5.24	2	2	3	3	3	2	3	4	3	3	2	2	1	2
FALSE	High	Master Protein	A0A087ZSF4	Uncharacterized protein OS=Apis mellifera OX=7460 GN=chb PE=4 SV=1	PREDICTED: Apis mellifera CLIP-associating protein 1-A (LOC410545), transcript variant X2, mRNA	0	FALSE	21.291	4	5	8	5	1301	144.9	9.42					2.23	0	2.38	1.74			0			5.83		0									1	1	1	1			1			2
FALSE	High	Master Protein	A0A087ZWC4	Uncharacterized protein OS=Apis mellifera OX=7460 GN=cib PE=4 SV=1	PREDICTED: Apis mellifera thymosin beta (LOC551528), transcript variant X2, mRNA	0.001	FALSE	4.768	11	1	1	1	166	18.5	5.62		1.88																				1
FALSE	High	Master Protein	A0A087ZS24	Uncharacterized protein OS=Apis mellifera OX=7460 GN=Clic PE=4 SV=1	PREDICTED: Apis mellifera chloride intracellular channel exc-4 (LOC408481), mRNA	0	FALSE	122.638	62	13	171	13	260	29.9	6.19	68.48	13.62	8.87	16.97	6.07	30.44	12.26	15.23	16.31	10.27	7.73	6.09	10.83	75.5		49.65	25.57	23.45	41.71	13.93	10	5	3	5	2	5	2	5	5	4	5	5	3	7
FALSE	High	Master Protein	A0A087ZUH9	Uncharacterized protein OS=Apis mellifera OX=7460 GN=CNOT1 PE=4 SV=1		0	FALSE	6.595	1	1	1	1	2402	269.6	7.08																3.39
FALSE	High	Master Protein	A0A087ZVP7	Uncharacterized protein OS=Apis mellifera OX=7460 GN=Cox4I1 PE=4 SV=1	PREDICTED: Apis mellifera cytochrome c oxidase subunit 4 isoform 1, mitochondrial (LOC412396), mRNA	0	FALSE	77.74	52	9	544	9	168	19.1	9.35	51.57	54.05	60.07	37.96	40.7	39.11	59.38	60.95	35.02	28.55	249.6	107.58	76.78	189.75	22.29	39.4	39.38	40.8	45.36	32.84	5	6	9	7	5	5	8	8	6	5	5	4	7	4
FALSE	High	Master Protein	A0A087ZZU9	Uncharacterized protein OS=Apis mellifera OX=7460 GN=Cox5a PE=4 SV=1	PREDICTED: Apis mellifera cytochrome c oxidase subunit 5A, mitochondrial (LOC408837), mRNA	0	FALSE	93.781	63	8	407	8	152	17.6	5.92	54.5	46.76	60.84	42.82	42.02	53.22	62.27	76.58	59.36	39.26	28.66	95.4	185.48	24.23	35.69	44.04	64.06	53.02	41.27	52.46	4	6	6	6	4	4	6	5	6	3	3	8	8	3
FALSE	High	Master Protein	A0A088A8C7	Uncharacterized protein OS=Apis mellifera OX=7460 GN=Cox5b PE=4 SV=1	PREDICTED: Apis mellifera cytochrome c oxidase subunit 5B, mitochondrial (LOC552610), mRNA	0	FALSE	126.182	56	7	388	7	122	13.9	8.32	53.63	55.92	62.07	40.82	65.7	53.16	73.94	78.51	56	51.96	36.25	75.79	99.97	110.75	20.17	49.01	44.59	57.64	25.73	41.56	5	5	5	5	5	5	6	5	4	5	3	4	4	5
FALSE	High	Master Protein	A0A088AQ34	Uncharacterized protein OS=Apis mellifera OX=7460 GN=Cox6a1 PE=3 SV=1		0	FALSE	93.421	73	7	440	7	114	13.4	9	53.03	63.05	46.24	49.67	66.52	25.21	56.94	70.58	29.69	23.93	60.11	32.5	13.37	67.72	12.13	46.28	56.34	53.93	48.36	49.84	5	5	5	5	5	4	4	5	3	4	3	3	4	5
FALSE	High	Master Protein	A0A087ZR01	Uncharacterized protein OS=Apis mellifera OX=7460 GN=Cpap3-c PE=4 SV=1	Apis mellifera cuticular protein analogous to peritrophins 3-C (Cpap3-c), mRNA	0	FALSE	13.684	18	3	3	3	269	29.5	5.01													6.57																				3
FALSE	High	Master Protein	A0A087ZT04	Uncharacterized protein OS=Apis mellifera OX=7460 GN=Cpap3-d PE=4 SV=1	Apis mellifera cuticular protein analogous to peritrophins 3-D (Cpap3-d), mRNA	0	FALSE	8.208	8	1	1	1	232	25.4	6.11							4.04																				1
FALSE	High	Master Protein	A0A088AMM7	Uncharacterized protein OS=Apis mellifera OX=7460 GN=Cpap3-e PE=4 SV=1	PREDICTED: Apis mellifera cuticular protein analogous to peritrophins 3-E (LOC413679), mRNA	0	FALSE	139.678	59	10	264	10	259	29.1	5.06	17.73	31.12	59.65	21.51	54.91	22.97	51.09	54.22	21.57	52.08	0	32.74	0	11.79	7.47	6.05	38.09	31.27	52.06	43.4	9	8	9	7	7	5	7	8	6	9	1	5	3	3
FALSE	High	Master Protein	A0A088ABN3	Uncharacterized protein OS=Apis mellifera OX=7460 GN=CPR1 PE=4 SV=1	Apis mellifera cuticular protein 1 (CPR1), mRNA	0	FALSE	37.745	53	6	26	5	216	21.6	7.47				4.4	5.9					18.6	4.9	7.22	4.12	9.55	0	1.96		6.07		3.05				1	2					4	1	2	2	2
FALSE	High	Master Protein	A0A088A4U6	Uncharacterized protein OS=Apis mellifera OX=7460 GN=CPR17 PE=4 SV=1	Apis mellifera cuticular protein 17 (CPR17), mRNA	0	FALSE	29.376	27	3	122	3	158	17.5	6.3	11.81	11.1	24.3	30.86	5.61	9.05	16.35	9.59	0	10.35	23.73	120.88		10.03	0	5.93	11.87	12.77	4.66	12.38	2	3	3	3	2	2	2	2	1	2	2	2		2
FALSE	High	Master Protein	A0A088A4T5	Uncharacterized protein OS=Apis mellifera OX=7460 GN=CPR18 PE=4 SV=1	Apis mellifera cuticular protein 18 (CPR18), mRNA	0	FALSE	5.179	13	1	9	1	133	14.2	4.72		1.67		0			2.12			0	1.86	1.66		3.41			2.66			0		1		1			1			1	1	1		1
FALSE	High	Master Protein	A0A088ABM3	Uncharacterized protein OS=Apis mellifera OX=7460 GN=CPR2 PE=4 SV=1	Apis mellifera cuticular protein 2 (CPR2), mRNA	0	FALSE	63.156	56	7	41	6	264	26.4	8.28					16.58	3.28		3.88	5.79	38.45				3.33	0	5.38	2.37	13.22		33.02					3	2		1	2	5				1
FALSE	High	Master Protein	A0A088AMJ8	Uncharacterized protein OS=Apis mellifera OX=7460 GN=CPR23 PE=4 SV=1	PREDICTED: Apis mellifera pro-resilin (LOC726725), transcript variant X1, mRNA	0	FALSE	24.082	25	3	9	3	191	21.4	7.64													22.78																				3
FALSE	High	Master Protein	A0A087ZUU1	Uncharacterized protein OS=Apis mellifera OX=7460 GN=CPR25 PE=4 SV=1		0.002	FALSE	4.395	4	1	2	1	268	25.1	5.2													6.51																				1
FALSE	High	Master Protein	A0A088ABN2	Uncharacterized protein OS=Apis mellifera OX=7460 GN=CPR3 PE=4 SV=1	Apis mellifera cuticular protein 3 (CPR3), mRNA	0	FALSE	31.847	46	7	17	7	317	34.3	5.69	2.78				4			2.41		21.16					0	2.68				1.75	1				2			1		7
FALSE	High	Master Protein	A0A088ABN1	Uncharacterized protein OS=Apis mellifera OX=7460 GN=CPR4 PE=4 SV=1		0	FALSE	47.89	56	5	55	5	123	13.2	8.13	7.93				15.91	7.24		10.32	12.3	26.19	1.68	1.97	0	2.56	0	4.22	2.93	19.83	10.67	22.94	2				4	2		3	3	4	1	1	1	2
FALSE	High	Master Protein	A0A087ZP95	Uncharacterized protein OS=Apis mellifera OX=7460 GN=CPR6 PE=4 SV=1	Apis mellifera cuticular protein 6 (CPR6), mRNA	0	FALSE	10.877	19	2	6	2	188	20.6	6.47										6.48			4.84		2.29					3.92										2			1
FALSE	High	Master Protein	A0A088AKM4	Uncharacterized protein OS=Apis mellifera OX=7460 GN=CREG PE=4 SV=1	PREDICTED: Apis mellifera protein CREG1 (LOC551913), mRNA	0	FALSE	11.488	10	2	2	2	290	33.7	7.55				4.68																				2
FALSE	High	Master Protein	A0A087ZPK0	Uncharacterized protein OS=Apis mellifera OX=7460 GN=Cryl1 PE=4 SV=1	Apis mellifera lambda crystallin-like protein (Cryl1), mRNA	0	FALSE	251.862	77	21	396	21	317	35.8	7.03	193.29	10.15	6.69	32	35.44	82.49	25.28	27.26	43.54	24.33	33.21	14.99	18.06	165.88	0	178.86		11.59	80.88	17.5	19	3	3	13	10	17	9	10	12	10	10	8	11	14
FALSE	High	Master Protein	A0A087ZWM2	Uncharacterized protein OS=Apis mellifera OX=7460 GN=CtBP PE=3 SV=1		0	FALSE	13.603	8	2	3	2	472	49.7	7.09	3.64										0			4.2							1										1			1
FALSE	High	Master Protein	A0A088A988	Uncharacterized protein OS=Apis mellifera OX=7460 GN=CTL4 PE=4 SV=1	PREDICTED: Apis mellifera sushi, von Willebrand factor type A, EGF and pentraxin domain-containing protein 1 (LOC412825), transcript variant X1, mRNA	0	FALSE	91.259	8	18	35	18	3510	383.4	5.17		16.17	0				25.75				2.26	0		2.54			17.75					10	1				10				1	1		2
FALSE	High	Master Protein	A0A088A503	Uncharacterized protein OS=Apis mellifera OX=7460 GN=Cyc1 PE=4 SV=1	PREDICTED: Apis mellifera cytochrome c1, heme protein, mitochondrial (LOC413605), transcript variant X1, mRNA	0	FALSE	160.977	47	9	427	9	311	34.9	8.12	75.64	62.68	74.55	48.58	68.54	58.23	62.29	76.44	45.86	24.93	79.44	75.74	170.3	70.17	15.61	51.02	59.36	63.95	42.7	44.83	7	7	7	7	6	6	7	7	7	5	4	5	5	4
FALSE	High	Master Protein	A0A087ZNI0	Uncharacterized protein OS=Apis mellifera OX=7460 GN=CYP6AS10 PE=3 SV=1		0	FALSE	23.197	12	5	17	3	499	58.3	8.46			7.14	2.84		3.6			2.62							8.51		9.06	5.43				4	1		1			1
FALSE	High	Master Protein	A0A088A3A5	Uncharacterized protein OS=Apis mellifera OX=7460 GN=CYP6AS15 PE=3 SV=1	PREDICTED: Apis mellifera probable cytochrome P450 6a13 (LOC551197), mRNA	0	FALSE	178.133	52	29	207	29	501	58.6	9.16	97.42		1.61		113.49	5.36		14.37	12.18	12.62	1.86			25.09	1.68	147.82		24.04	20.19	53.22	19		1		22	2		7	6	5	2			7
FALSE	High	Master Protein	A0A088AEJ9	Uncharacterized protein OS=Apis mellifera OX=7460 GN=CYP6AS4 PE=3 SV=1	PREDICTED: Apis mellifera probable cytochrome P450 6a17 (LOC412209), mRNA	0	FALSE	87.557	38	18	73	14	501	57.8	8.9	14.02	16.15	0	1.81	6.13	5.58	1.65	0	0					29.97		52.66		9.62	0	0	4	8	1	2	2	5	1	1	1					7
FALSE	High	Master Protein	A0A088AEK7	Uncharacterized protein OS=Apis mellifera OX=7460 GN=CYP6AS7 PE=3 SV=1	PREDICTED: Apis mellifera uncharacterized LOC412936 (LOC412936), mRNA	0	FALSE	58.694	25	10	47	8	505	59	8.87	17.64	0	2.22	2.84	2.02	3.6	5.79					2.2	1.88	1.7		13.24	7.49	14.16	11.08		4	1	1	1	1	2	4					1	1	1
FALSE	High	Master Protein	A0A087ZXU5	Uncharacterized protein OS=Apis mellifera OX=7460 GN=CYP9Q1 PE=3 SV=1	PREDICTED: Apis mellifera cytochrome P450 9e2 (LOC410492), mRNA	0	FALSE	344.617	75	33	505	33	510	58.8	8.72	300.26		46.42	26.01	160.37	81.66		138.6	51.89	54.85	8.61	4.65		245.74	7.8	155.72	0	72.59	32.07	84.68	27		11	12	24	16		22	14	12	4	3		23
FALSE	High	Master Protein	A0A087ZXV8	Uncharacterized protein OS=Apis mellifera OX=7460 GN=CYP9Q2 PE=3 SV=1	PREDICTED: Apis mellifera cytochrome P450 9e2 (LOC408452), mRNA	0	FALSE	498.529	77	34	1097	33	532	60.9	8.38	372.38	0	107.42	36.25	414.45	210.87	1.79	215.93	56.31	106.32	17.98	4.12	2.2	409.06	33.88	386.22	4.45	187.51	173.82	224.37	25	1	23	14	26	24	1	26	18	22	4	2	2	26
FALSE	High	Master Protein	A0A087ZXV9	Uncharacterized protein OS=Apis mellifera OX=7460 GN=CYP9Q3 PE=3 SV=1	PREDICTED: Apis mellifera cytochrome P450 9e2 (LOC408453), mRNA	0	FALSE	27.703	16	8	21	7	517	58.9	8.41	5.49			0	2.57	4.56		5.88					5.91	4.67		6.43				1.87	2			1	1	2		2					5	3
FALSE	High	Master Protein	A0A088ARQ2	Uncharacterized protein OS=Apis mellifera OX=7460 GN=Dbp80 PE=4 SV=1		0	FALSE	28.817	14	6	31	6	475	53.2	6.48	8.32	2.65	1.65	4.85	5.86	2.52	3.22	0	2.49	4.47	1.69		0	4.66	0	5.63	5.07	6.03	2.97	8.41	3	1	1	2	2	1	1	1	1	2	1		1	2
FALSE	High	Master Protein	A0A088ACJ2	Uncharacterized protein OS=Apis mellifera OX=7460 GN=Dctn2 PE=4 SV=1	PREDICTED: Apis mellifera dynactin subunit 2 (LOC412267), mRNA	0	FALSE	31.466	14	4	5	4	405	46	5.02	1.79													14.22							1													4
FALSE	High	Master Protein	A0A087ZYP9	Uncharacterized protein OS=Apis mellifera OX=7460 GN=Ddx1 PE=4 SV=1		0	FALSE	5.897	4	2	2	2	733	81.8	7.46																1.84
FALSE	High	Master Protein	A0A088AGA6	Uncharacterized protein OS=Apis mellifera OX=7460 GN=Dhpr PE=4 SV=1	PREDICTED: Apis mellifera dihydropteridine reductase (LOC409160), mRNA	0	FALSE	29.002	36	6	10	1	237	25.7	8.76	3.2	5.61									2.23	0	5.58	2.49							1	2									1	1	2	1
FALSE	High	Master Protein	A0A088AAD0	Uncharacterized protein OS=Apis mellifera OX=7460 GN=DHRS4 PE=4 SV=1	Apis mellifera dehydrogenase/reductase (SDR family) member 4 (DHRS4), mRNA	0	FALSE	23.214	20	4	8	4	272	29.8	9.29		0			1.66	0					0			2.94		6.37		2.69				1			1	1					1			1
FALSE	High	Master Protein	A0A088A0L4	Uncharacterized protein OS=Apis mellifera OX=7460 GN=dre4 PE=4 SV=1		0.008	FALSE	3.071	1	1	1	1	1134	128.7	6.64														1.71																				1
FALSE	High	Master Protein	A0A088A5J1	Uncharacterized protein OS=Apis mellifera OX=7460 GN=Droj2 PE=3 SV=1	PREDICTED: Apis mellifera dnaJ homolog subfamily A member 1 (LOC724368), transcript variant X1, mRNA	0	FALSE	98.999	44	12	151	12	399	44.8	6.61	50.9	15.44	6.16	32.96	15.1	25.16	29.77	12.7	13.93	15.68	18.23	14.12	4.44	25.21		26.59	16.14	14.78	21.1	13.35	9	5	4	7	4	6	6	5	5	5	5	4	2	5
FALSE	High	Master Protein	A0A088A7W1	Uncharacterized protein OS=Apis mellifera OX=7460 GN=Drp1 PE=3 SV=1		0	FALSE	145.522	41	20	133	20	739	83	7.33	62.63	4.98	4.45	13.58	11.62	30.15	8.01	9.99	11.96	11.58	11.95	0	8.91	40.54		51.82		11.38	23.06	13.21	12	1	2	8	3	9	2	5	6	4	6	2	8	9
FALSE	High	Master Protein	A0A088ABG0	Uncharacterized protein OS=Apis mellifera OX=7460 GN=ebi PE=4 SV=1		0	FALSE	6.619	4	1	1	1	512	56.1	5.5	3.18																				1
FALSE	High	Master Protein	A0A087ZNZ9	Uncharacterized protein OS=Apis mellifera OX=7460 GN=Echs1 PE=3 SV=1		0	FALSE	191.867	56	18	760	18	295	32.5	9.06	163.37	68.99	31.38	58.38	25.67	111.77	102.58	48.96	37.93	9.15	185.12	113.37	64.1	315.6	0	132.72	114	129.39	134.84	57.68	16	11	8	12	7	15	14	11	10	3	11	13	12	15
FALSE	High	Master Protein	A0A087ZVI0	Uncharacterized protein OS=Apis mellifera OX=7460 GN=eEF1delta PE=3 SV=1	PREDICTED: Apis cerana probable elongation factor 1-delta (LOC108003967), transcript variant X2, mRNA	0	FALSE	39.063	17	5	38	5	426	48.1	5.95	19.51	7.55		6.67		5.57	12.36	2.43	0	1.93	4.9	4.45	2.18	9.21		5.36	2.63	2.96	2.73	2.49	4	2		3		1	4	1	1	1	1	2	1	2
FALSE	High	Master Protein	A0A088A6Z1	Uncharacterized protein OS=Apis mellifera OX=7460 GN=Ef1beta PE=4 SV=1	PREDICTED: Apis mellifera elongation factor 1-beta' (LOC552649), mRNA	0	FALSE	54.483	43	7	50	7	217	24.6	4.79	25.64	2.69		5.21	5.46	8.61	10.73		2.31		10.43	6.5	0	13.21		29.02	0	2.53	0		5	1		2	2	3	3		1		3	3	1	2
FALSE	High	Master Protein	A0A087ZZ10	Uncharacterized protein OS=Apis mellifera OX=7460 GN=eIF2B-alpha PE=3 SV=1	PREDICTED: Apis mellifera translation initiation factor eIF-2B subunit alpha (LOC409118), transcript variant X2, mRNA	0	FALSE	6.163	6	1	1	1	301	33.6	5.94	3.59																				1
FALSE	High	Master Protein	A0A088ATR1	Uncharacterized protein OS=Apis mellifera OX=7460 GN=eIF2B-beta PE=3 SV=1		0	FALSE	9.713	8	2	2	2	353	39.5	5.27	5.04																				2
FALSE	High	Master Protein	A0A088AW55	Uncharacterized protein OS=Apis mellifera OX=7460 GN=eIF-4E PE=3 SV=1	PREDICTED: Apis mellifera eukaryotic translation initiation factor 4E-1A (LOC551901), mRNA	0	FALSE	23.42	18	3	6	3	213	24.8	5.68	7.93					2.91								5.05		6.68					1					1								1
FALSE	High	Master Protein	A0A088AUZ0	Uncharacterized protein OS=Apis mellifera OX=7460 GN=Ero1L PE=4 SV=1		0	FALSE	22.232	11	4	9	4	471	55	7.06	10.41													9.67		3.22					3													2
FALSE	High	Master Protein	A0A088APW3	Uncharacterized protein OS=Apis mellifera OX=7460 GN=fax PE=4 SV=1		0	FALSE	58.204	46	10	29	10	391	44.6	5.64	3.32		0	3.95	3.17	1.94			1.76				20.55	3.32		3.38		2.9	5.84	2.24	1		1	2	1	1			1				7	1
FALSE	High	Master Protein	A0A088ALP1	Uncharacterized protein OS=Apis mellifera OX=7460 GN=Fib PE=3 SV=1	PREDICTED: Apis mellifera rRNA 2'-O-methyltransferase fibrillarin (LOC551992), transcript variant X1, mRNA	0	FALSE	71.096	43	9	93	9	310	32.3	10.02	36.6	13.93		2.3	25.64	8.62	9.64	24.64	4.51	5.93	8.84	6.44	2.4	9.61	2.5	22.43	13.66	20.87	18.52	13.16	8	4		2	6	3	3	6	3	3	2	2	2	2
FALSE	High	Master Protein	A0A088ALH6	Uncharacterized protein OS=Apis mellifera OX=7460 GN=Fim PE=4 SV=1		0	FALSE	120.793	35	19	55	19	631	70.7	5.55	44.42		1.6						11.25		0		3.91	33.91	0	19.49					13		3						6		1		3	10
FALSE	High	Master Protein	A0A088AFK9	Uncharacterized protein OS=Apis mellifera OX=7460 GN=Fmr1 PE=4 SV=1		0	FALSE	54.097	19	10	30	10	621	69.4	8.57	26.47				0	8.44	2.19				7.76		2.53	13.07		3.14		2.12	2.98		6				1	3	1				3		5	3
FALSE	High	Master Protein	A0A088AEW8	Uncharacterized protein OS=Apis mellifera OX=7460 GN=Gad1 PE=3 SV=1		0	FALSE	25.66	10	4	8	4	491	55.7	6.65	2.57													8.83		3.2					2													3
FALSE	High	Master Protein	A0A088A5R0	Uncharacterized protein OS=Apis mellifera OX=7460 GN=gammaSnap PE=4 SV=1		0	FALSE	37.82	21	7	12	7	351	39	5.01	10.92										2.69	0	0	11.27					2.19		4										1	1	1	4
FALSE	High	Master Protein	A0A088ADK8	Uncharacterized protein OS=Apis mellifera OX=7460 GN=Gfat2 PE=4 SV=1	PREDICTED: Apis mellifera glucosamine-fructose-6-phosphate aminotransferase 2 (Gfat2), transcript variant X2, mRNA	0	FALSE	346.543	67	38	173	38	691	77.5	6.77	165.48				11.92				53.12				0	124.29	0	97.27		21.13			27				3				14				2	21
FALSE	High	Master Protein	A0A088AQ51	Uncharacterized protein OS=Apis mellifera OX=7460 GN=GMCOX18 PE=3 SV=1	PREDICTED: Apis mellifera glucose dehydrogenase [FAD, quinone] (LOC413098), mRNA	0	FALSE	32.618	16	6	17	6	683	76.1	8.81			2.63	14.45				4.82		8.59							2.61			6.42			1	5				2		3
FALSE	High	Master Protein	A0A088AJU9	Uncharacterized protein OS=Apis mellifera OX=7460 GN=GMCOX6 PE=3 SV=1		0	FALSE	10.827	8	3	6	3	629	70.6	8.41				0						0								2.72		1.94				1						2
FALSE	High	Master Protein	A0A088AHC3	Uncharacterized protein OS=Apis mellifera OX=7460 GN=Gp150 PE=4 SV=1		0	FALSE	96.188	23	12	56	12	908	102.8	5.17	27.32	1.72			11.76	7.86	6.02	1.7						13.1	0	34.32	0	11.97	0	2.59	5	1			5	2	3	1						3
FALSE	High	Master Protein	A0A088AVL1	Uncharacterized protein OS=Apis mellifera OX=7460 GN=gry PE=4 SV=1		0.002	FALSE	4.378	1	1	4	1	1094	125.2	6.86	2.44					1.79	2.33											1.87			1					1	1
FALSE	High	Master Protein	A0A088AFL5	Uncharacterized protein OS=Apis mellifera OX=7460 GN=GstD1 PE=4 SV=1	Apis mellifera glutathione S-transferase D1 (GstD1), mRNA	0	FALSE	366.821	82	19	1961	19	240	27.6	7.88	316.44	124.53	68.94	210.33	100.79	294.33	129.17	102.21	33.38	82.27	388.29	491.87	15.68	1210.84	6.4	505	136.12	84.94	426.84	140.23	17	15	11	17	14	17	15	16	10	15	16	14	3	17
FALSE	High	Master Protein	A0A088AV36	Uncharacterized protein OS=Apis mellifera OX=7460 GN=GST-mic1 PE=4 SV=1		0	FALSE	42.963	31	4	157	4	149	17.1	9.74	30.5	37.59	21.55	26.12	15.87	14.55	39.5	10.73	10.86	13.01	7.62	10.2	6.58	17.19	4.51	17.71	45.99	15.73	15.9	24.91	2	4	4	4	2	2	4	2	2	2	1	1	1	1
FALSE	High	Master Protein	A0A088A0S0	Uncharacterized protein OS=Apis mellifera OX=7460 GN=GstO1 PE=3 SV=1	PREDICTED: Apis mellifera pyrimidodiazepine synthase (LOC552118), transcript variant X1, mRNA	0	FALSE	7.031	10	2	3	2	241	28	6.95	5.47											0									2											1
FALSE	High	Master Protein	A0A087ZVS9	Uncharacterized protein OS=Apis mellifera OX=7460 GN=GstT1 PE=3 SV=1	PREDICTED: Apis mellifera glutathione S-transferase theta-3 (LOC552314), mRNA	0	FALSE	93.672	68	13	138	13	230	27.2	8.7	31.54	12.84	9.48	11.76	16.41	16.98	31.94	21.47	8.49		2.47	2.33	2.27	19.39		36.08	20.11	21.18	18.29	2.28	8	6	5	6	7	7	9	8	5		1	2	1	7
FALSE	High	Master Protein	A0A088AB84	Uncharacterized protein OS=Apis mellifera OX=7460 GN=GstZ1 PE=3 SV=1		0	FALSE	6.572	6	1	11	1	217	24.8	7.77	4.98	0		0		2.17	0									2.69	0	0	2.29	0	1	1		1		1	1
FALSE	High	Master Protein	A0A088ARD0	Uncharacterized protein OS=Apis mellifera OX=7460 GN=Hmt-1 PE=4 SV=1	PREDICTED: Apis mellifera ATP-binding cassette sub-family B member 6, mitochondrial (LOC726867), mRNA	0	FALSE	39.001	13	7	20	7	818	93.2	8.82	23.67		6.66		2.55	3.36	0	6.36						7.09		4.35	2.26	8.11			4		3		1	1	1	2						2
FALSE	High	Master Protein	A0A087ZTY7	Uncharacterized protein OS=Apis mellifera OX=7460 GN=Hsc70-5 PE=3 SV=1		0	FALSE	442.274	67	40	1045	40	687	75.4	6.76	262.29	134.86	49.61	104.17	54.48	191.36	188.29	78.03	33.88	24.66	306.59	172.39	129.12	471.89	4.23	247.25	170.23	162.44	185.94	58.87	32	23	13	20	12	29	28	18	10	7	19	25	23	25
FALSE	High	Master Protein	A0A088AGW8	Uncharacterized protein OS=Apis mellifera OX=7460 GN=Hsc70cb PE=4 SV=1	PREDICTED: Apis mellifera heat shock protein 70Cb ortholog (LOC408706), transcript variant X1, mRNA	0	FALSE	297.509	61	43	282	42	867	97.7	6.04	145.52	7.86		7.82	0	58.69	53.61		5.07		38.96	31.89	24.64	92.69		122.08	33.22	11.11	56.89		31	6		5	1	15	17		3		13	11	11	20
FALSE	High	Master Protein	A0A088A4Z4	Uncharacterized protein OS=Apis mellifera OX=7460 GN=IGFn3-12 PE=4 SV=1		0	FALSE	409.683	52	32	891	32	778	87.2	6.51	259.54	3.41	138.52	70.1	186.15	164.45	20.53	277.61	142	96.84	44.02	14.68	1.96	348.47	91.59	149.33	8.76	327.33	125.75	209.59	23	1	24	16	22	24	6	28	24	22	11	6	1	24
FALSE	High	Master Protein	A0A088A0C7	Uncharacterized protein OS=Apis mellifera OX=7460 GN=IGFn3-7 PE=4 SV=1	PREDICTED: Apis mellifera neuroglian (LOC411829), transcript variant X2, mRNA	0	FALSE	195.882	34	28	170	28	1251	139.7	5.57	23.66	55.8	45.18	2.02	9.85	3.6	61.76	18.1		1.72	33.5	8.11	12.62	54.09	0	19.02	43.95	26.03	8.89	8.81	6	18	16	1	3	1	18	6		1	11	6	8	13
FALSE	High	Master Protein	A0A088AD04	Uncharacterized protein OS=Apis mellifera OX=7460 GN=Iswi PE=4 SV=1		0	FALSE	17.882	4	3	4	3	1009	117.2	8.31	3.05													3.11					0		1													2
FALSE	High	Master Protein	A0A088ACY6	Uncharacterized protein OS=Apis mellifera OX=7460 GN=jagn PE=4 SV=1	PREDICTED: Apis mellifera protein jagunal (LOC552705), mRNA	0	FALSE	21.79	15	2	8	2	192	22.6	9.01		0					2.74					0		11.23			2.16		2.14			1					1					1		2
FALSE	High	Master Protein	A0A088AUH9	Uncharacterized protein OS=Apis mellifera OX=7460 GN=Kr-h2 PE=4 SV=1		0	FALSE	36.235	31	6	45	6	252	29.1	9.99	6.46	3.46	0	1.86	2.84	5.03	7.18	1.75			6.71	5.28	4.25	25.64		1.92	4.86	3.83	10.71	4.65	3	2	2	2	2	2	3	1			3	1	1	3
FALSE	High	Master Protein	A0A087ZV19	Uncharacterized protein OS=Apis mellifera OX=7460 GN=La PE=4 SV=1		0	FALSE	40.286	23	7	20	7	404	46.9	6.16	27.24	0				2.64	3.51					0		2.81		11.87			2.36		7	1				1	2					1		1
FALSE	High	Master Protein	A0A088AI31	Uncharacterized protein OS=Apis mellifera OX=7460 GN=LOC408280 PE=4 SV=1	PREDICTED: Apis mellifera cell surface glycoprotein 1 (LOC408280), mRNA	0	FALSE	17.864	10	3	5	3	573	61.5	6.18				2.93						7.5		2.55		2.87										1						2		1		1
FALSE	High	Master Protein	A0A088AHF2	Uncharacterized protein OS=Apis mellifera OX=7460 GN=LOC408284 PE=4 SV=1	PREDICTED: Apis mellifera mitochondrial import receptor subunit TOM40 homolog 1 (LOC408284), mRNA	0	FALSE	104.117	53	13	126	13	332	35.3	7.81	25.37	15.99	19.69	7.71	29.11	19.22	28.18	32.2	8.09	6.95	14.24	6.62	15.15	31.66	0	25.33	21.61	21.24	17.65	16.96	5	4	5	1	6	5	9	9	5	3	4	3	5	5
FALSE	High	Master Protein	A0A088AHJ0	Uncharacterized protein OS=Apis mellifera OX=7460 GN=LOC408291 PE=3 SV=1	PREDICTED: Apis mellifera 3-ketoacyl-CoA thiolase, mitochondrial (LOC408291), mRNA	0	FALSE	246.199	71	20	538	20	399	42.5	8.75	124.67	128.71	32.51	60.24	16.66	105.2	149.18	69.81	18.7	5.72	98.81	76.23	25.46	286.32		130.02	136.12	118	92.35	52.15	14	16	10	13	5	14	18	13	8	2	12	12	10	14
FALSE	High	Master Protein	A0A088A1L3	Uncharacterized protein OS=Apis mellifera OX=7460 GN=LOC408349 PE=3 SV=1		0	FALSE	75.093	37	14	165	14	432	49.2	9.26	31.98	18.5	19.42	2.68	35.95	17.56	24.9	33.85	11.96	2.17	4.29	0	1.78	10.71	2.32	20.89	23.79	33.97	9.66	12.95	9	7	9	4	8	6	8	7	7	2	3	1	2	4
FALSE	High	Master Protein	A0A088ASW6	Uncharacterized protein OS=Apis mellifera OX=7460 GN=LOC408402 PE=4 SV=1	PREDICTED: Apis mellifera acetyl-coenzyme A transporter 1 (LOC408402), transcript variant X2, mRNA	0	FALSE	12.632	10	3	5	3	515	58.2	8.5							0									4.47	4.01										1
FALSE	High	Master Protein	A0A088A9D8	Uncharacterized protein OS=Apis mellifera OX=7460 GN=LOC408414 PE=3 SV=1	PREDICTED: Apis mellifera tropomyosin-1 (LOC408414), mRNA	0	FALSE	486.427	73	37	789	35	284	32.1	4.78	95.12	147.85	108.76	125.97	137.98	112.73	232.35	39.25	157.33	193.61	57.72	391.81	22.14	272.97	44.55	5.5	43.74	158.92	40.95	25.86	16	22	19	22	20	20	28	10	22	25	11	32	7	24
FALSE	High	Master Protein	A0A087ZSF5	Uncharacterized protein OS=Apis mellifera OX=7460 GN=LOC408477 PE=4 SV=1		0	FALSE	20.623	25	5	86	5	185	22.4	9.74	11.34	5.14	9.94	1.8	5.14	8.78	7.13	10.26	0	0	3.96	3.48	4.33	6.79	0	7.84	3.61	7.38	4.21	1.76	5	4	4	3	3	4	4	4	2	1	1	2	1	2
FALSE	High	Master Protein	A0A087ZSB5	Uncharacterized protein OS=Apis mellifera OX=7460 GN=LOC408497 PE=4 SV=1		0	FALSE	68.924	13	12	30	12	1088	125	5.12	10.36	2.46		0		2.89	6.75	2.37			4.95		1.8	19.04		4.86	9.16	2.05			4	1		1		1	2	1			5		1	5
FALSE	High	Master Protein	A0A088AEV7	Uncharacterized protein OS=Apis mellifera OX=7460 GN=LOC408516 PE=4 SV=1	PREDICTED: Apis mellifera protein D2 (LOC408516), transcript variant X1, mRNA	0	FALSE	41.407	43	7	72	7	209	23.6	9.16	20.59	8.74		10.86	5.24	7.96	9.74	5.05	8.5	0	6.2	9.88	4.37	11.82		23.5		4.84	7.75	3.42	5	3		6	2	3	4	2	3	2	2	3	1	3
FALSE	High	Master Protein	A0A088AID6	Uncharacterized protein OS=Apis mellifera OX=7460 GN=LOC408557 PE=3 SV=1		0	FALSE	29.822	18	6	11	6	394	45.2	6.28	6.41						1.8							7.15		5.66					3						3							3
FALSE	High	Master Protein	A0A088A3U0	Uncharacterized protein OS=Apis mellifera OX=7460 GN=LOC408564 PE=4 SV=1		0	FALSE	81.425	34	16	55	16	648	73.1	9.19		43.37	4.51		1.67	7.54	19.99	2.05	0	2.54				6.51	0	5.5		14.08	9.18	8.09		14	3		1	1	7	1	1	1				4
FALSE	High	Master Protein	A0A087ZTI9	Uncharacterized protein OS=Apis mellifera OX=7460 GN=LOC408567 PE=3 SV=1		0	FALSE	170.932	55	17	365	17	417	46.5	8.31	129.5	33.77	13.49	21.38	31.53	78.31	70.76	43.53	18.06	2.81	32.44	27.49	36.45	143.04		106.92	62.8	93.52	80.67	34.87	15	10	5	7	8	14	13	10	3	1	7	7	10	10
FALSE	High	Master Protein	A0A087ZTQ3	Uncharacterized protein OS=Apis mellifera OX=7460 GN=LOC408580 PE=4 SV=1	PREDICTED: Apis mellifera eukaryotic translation initiation factor 2D (LOC408580), transcript variant X1, mRNA	0	FALSE	7.717	3	1	1	1	582	65.2	7.93														4.16																				1
FALSE	High	Master Protein	A0A088AC16	Uncharacterized protein OS=Apis mellifera OX=7460 GN=LOC408608 PE=4 SV=1	PREDICTED: Apis mellifera uncharacterized LOC408608 (LOC408608), mRNA	0	FALSE	7.181	10	1	3	1	181	19.4	7.18								2.31		2.77										3.65								1		1
FALSE	High	Master Protein	A0A088ATH2	Uncharacterized protein OS=Apis mellifera OX=7460 GN=LOC408642 PE=4 SV=1		0	FALSE	13.42	11	3	6	3	409	47.2	8.54	0						0									5.44			0		1						1
FALSE	High	Master Protein	A0A088AUM2	Uncharacterized protein OS=Apis mellifera OX=7460 GN=LOC408672 PE=4 SV=1		0	FALSE	25.18	32	4	38	4	190	22	4.88	10.52	1.96		6.58	3.26	5.54	6.55	4.1	3.04	9.15		2.75		7.28	0	12.68	0		7.97	4.6	3	2		2	1	3	2	1	1	3		1		1
FALSE	High	Master Protein	A0A088AV37	Uncharacterized protein OS=Apis mellifera OX=7460 GN=LOC408677 PE=4 SV=1	PREDICTED: Apis mellifera titin (LOC408677), transcript variant X5, mRNA	0	FALSE	633.536	42	87	353	87	4696	537.6	8.28	37.54	93.13			33.77	57.71	124.99				111.43	121.92		185.95		4.01	145.5	18.47	32.33	3.23	6	30			5	13	34				30	40		31
FALSE	High	Master Protein	A0A088A4D4	Uncharacterized protein OS=Apis mellifera OX=7460 GN=LOC408722 PE=4 SV=1	PREDICTED: Apis mellifera sodium/potassium-transporting ATPase subunit beta-2 (LOC408722), mRNA	0	FALSE	114.607	41	10	191	9	315	36	7.97							0						504.18				0										1						10
FALSE	High	Master Protein	A0A088ADL7	Uncharacterized protein OS=Apis mellifera OX=7460 GN=LOC408817 PE=3 SV=1	PREDICTED: Apis mellifera alanine--glyoxylate aminotransferase 2-like (LOC408817), mRNA	0	FALSE	34.036	21	7	10	7	482	53.8	7.17	5.6				1.89			2.47						5.24		5.69		1.62			2				1			2						2
FALSE	High	Master Protein	A0A088A015	Uncharacterized protein OS=Apis mellifera OX=7460 GN=LOC408851 PE=3 SV=1	PREDICTED: Apis mellifera putative cysteine proteinase CG12163 (LOC408851), transcript variant X1, mRNA	0	FALSE	35.419	8	7	53	7	881	100.3	6.1	2.14	2.12	6.05	17.06	11.66	4.97	2.84	4.85	3.2	3.35	3.16	2.93		6.19	2.26	2.68	2.85	7.8	5.32	12.21	1	3	4	7	4	3	1	2	2	1	1	1		1
FALSE	High	Master Protein	A0A087ZX01	Uncharacterized protein OS=Apis mellifera OX=7460 GN=LOC408876 PE=4 SV=1		0	FALSE	7.886	9	2	6	2	286	31.8	6.52	2.84	0				2.53	2.27							1.96			2.01				1	1				1	1							1
FALSE	High	Master Protein	A0A087ZRV0	Uncharacterized protein OS=Apis mellifera OX=7460 GN=LOC408892 PE=4 SV=1	PREDICTED: Apis mellifera 3-ketodihydrosphingosine reductase (LOC408892), mRNA	0	FALSE	8.585	5	1	1	1	333	36.9	8.69														2.7																				1
FALSE	High	Master Protein	A0A088A9R3	Uncharacterized protein OS=Apis mellifera OX=7460 GN=LOC408904 PE=3 SV=1	PREDICTED: Apis mellifera non-specific lipid-transfer protein (LOC408904), mRNA	0	FALSE	265.291	66	24	375	24	539	59	8.47	141.98	47.13	14.83	44.3	18.63	56.08	92.65	21.04	16.64	6.19	34.77	31.07	5.97	85.42		141.32	85.94	100.51	78.58	15.73	19	13	12	15	7	14	17	7	8	4	7	11	6	11
FALSE	High	Master Protein	A0A087ZYN5	Uncharacterized protein OS=Apis mellifera OX=7460 GN=LOC408920 PE=4 SV=1	PREDICTED: Apis mellifera long-chain fatty acid transport protein 4 (LOC408920), mRNA	0	FALSE	94.691	41	17	63	17	626	70.1	8.38	13.03	15.91	0			4.94	26.23				4.79	6.56	0	13.42		25.13	49.7	7.54	5.08		3	6	1			1	8				2	3	1	4
FALSE	High	Master Protein	A0A087ZUS7	Uncharacterized protein OS=Apis mellifera OX=7460 GN=LOC409002 PE=4 SV=1		0	FALSE	13.182	33	4	7	4	174	18.6	9.29													12.65																				4
FALSE	High	Master Protein	A0A088A8V8	Uncharacterized protein OS=Apis mellifera OX=7460 GN=LOC409066 PE=3 SV=1	PREDICTED: Apis mellifera pyridoxine-5'-phosphate oxidase (LOC409066), mRNA	0	FALSE	145.817	71	14	125	14	241	28.1	9.23	77		0	11.22	13.83	43.77		11.46	0	9.74	0	1.72		17.3		90.56		8.66	37.74	24.1	12		1	3	3	10		4	1	4	1	1		4
FALSE	High	Master Protein	A0A088A7W2	Uncharacterized protein OS=Apis mellifera OX=7460 GN=LOC409074 PE=3 SV=1		0	FALSE	118.146	59	8	50	8	207	21.6	9.03	5.5	1.56	3.41	1.87	3.96	1.61	5.36	0	0		2.69			87.06		3.61	5.38	5.5	5.53	1.99	1	1	1	1	1	1	1	1	1		1			6
FALSE	High	Master Protein	A0A088AV05	Uncharacterized protein OS=Apis mellifera OX=7460 GN=LOC409087 PE=4 SV=1	PREDICTED: Apis mellifera D-beta-hydroxybutyrate dehydrogenase, mitochondrial (LOC409087), transcript variant X1, mRNA	0	FALSE	39.649	35	12	62	12	366	41.2	7.4	11.45	9.43	3.86	1.77	13.04	9.74	10.32		2.23	6.21	4.69	3.86		2.72	1.9	7.93	7.23	8.97	13.76		5	3	2	1	5	4	5		1	3	3	4		1
FALSE	High	Master Protein	A0A088ATI7	Uncharacterized protein OS=Apis mellifera OX=7460 GN=LOC409126 PE=4 SV=1		0	FALSE	79.653	72	12	117	12	214	23.7	6.68	33.82	9.28	11.61	23.18	23.26	16.06	20.79	19.85	14.2	8.11	17.27	13.24	15.85	27.05	5.62	20.97	19.28	24.96	13.32	9.99	8	3	5	6	5	3	4	6	5	2	4	4	4	5
FALSE	High	Master Protein	A0A088ATB5	Uncharacterized protein OS=Apis mellifera OX=7460 GN=LOC409189 PE=3 SV=1		0	FALSE	8.075	9	2	6	2	339	36.3	9.85	0							2.39										4.76	2.49	2.25	1							1
FALSE	High	Master Protein	A0A087ZWD2	Uncharacterized protein OS=Apis mellifera OX=7460 GN=LOC409265 PE=4 SV=1		0	FALSE	21.276	7	5	15	4	705	80.4	8.25	1.74	0	0			0	3.54						0	5.33			3.47				1	2	1			1	3						1	2
FALSE	High	Master Protein	A0A087ZVD6	Uncharacterized protein OS=Apis mellifera OX=7460 GN=LOC409310 PE=4 SV=1		0.002	FALSE	4.27	2	1	1	1	767	85.1	8.51														1.69																				1
FALSE	High	Master Protein	A0A087ZQI7	Uncharacterized protein OS=Apis mellifera OX=7460 GN=LOC409340 PE=4 SV=1	PREDICTED: Apis mellifera UV excision repair protein RAD23 homolog B (LOC409340), transcript variant X2, mRNA	0	FALSE	10.42	4	1	2	1	364	39.6	4.68												1.66		3.19																		1		1
FALSE	High	Master Protein	A0A088ART2	Uncharacterized protein OS=Apis mellifera OX=7460 GN=LOC409384 PE=3 SV=1	PREDICTED: Apis mellifera heat shock protein 60A (LOC409384), mRNA	0	FALSE	448.678	69	34	878	34	570	60.4	5.83	219.93	144.68	65.96	141.76	60.49	244.74	218.31	81.8	34.58	39.88	140.02	164.31	48.62	245.71	8.46	161.16	81.91	216.65	137.22	80.12	28	26	20	26	11	25	27	19	12	10	18	20	18	22
FALSE	High	Master Protein	A0A088A2R1	Uncharacterized protein OS=Apis mellifera OX=7460 GN=LOC409411 PE=4 SV=1		0.005	FALSE	3.812	3	1	1	1	259	29.3	9.23											2.59																				1
FALSE	High	Master Protein	A0A088AP38	Uncharacterized protein OS=Apis mellifera OX=7460 GN=LOC409420 PE=3 SV=1	PREDICTED: Apis mellifera cytochrome c oxidase assembly protein COX11, mitochondrial (LOC409420), transcript variant X1, mRNA	0	FALSE	17.066	29	3	12	3	224	26.4	8.56	7.77	2.32	1.81		4.43	3.18	2.23									0		2.39			2	2	1		2	2	1
FALSE	High	Master Protein	A0A088ABA5	Uncharacterized protein OS=Apis mellifera OX=7460 GN=LOC409457 PE=4 SV=1		0	FALSE	111.536	12	23	60	23	2646	293.7	7.53	43.52					3.35	2.46	0	4.67	0	1.83	0	0	14.88		15.42	1.87	1.75		3.11	15					3	3	2	3	1	1	1	1	5
FALSE	High	Master Protein	A0A088A5A6	Uncharacterized protein OS=Apis mellifera OX=7460 GN=LOC409481 PE=3 SV=1		0	FALSE	131.455	79	12	314	11	182	20.7	6.58	46.95	16.91	40.89	90.94	39.08	35.08	25.4	41.69	56.67	21.86	23.99	26.96	20.31	39.51	8.47	46.93	28.97	41.81	60.76	50.12	7	5	8	11	7	7	7	8	8	5	4	5	6	6
FALSE	High	Master Protein	A0A088A4K3	Uncharacterized protein OS=Apis mellifera OX=7460 GN=LOC409485 PE=3 SV=1	PREDICTED: Apis mellifera cytoplasmic aconitate hydratase (LOC409485), mRNA	0	FALSE	9.093	3	2	8	2	890	98.8	6.95	5.98	0				0	3.66									3.25			2		1	1				1	2
FALSE	High	Master Protein	A0A088A241	Uncharacterized protein OS=Apis mellifera OX=7460 GN=LOC409494 PE=3 SV=1		0	FALSE	12.365	12	2	3	2	300	32.4	9.48											3.12			7.03																	1			2
FALSE	High	Master Protein	A0A087ZT28	Uncharacterized protein OS=Apis mellifera OX=7460 GN=LOC409529 PE=4 SV=1	PREDICTED: Apis mellifera ras-like protein 2 (LOC409529), transcript variant X1, mRNA	0	FALSE	38.973	40	7	63	6	199	23	7.77	10.21	11.41	10.2	7.29	10.25	6.09	6.11	7.05	5.6	6.87	2.27	7.87	5.17	5.87	4.36	13.4	14.17	19.89	15.17	11.74	2	3	3	3	2	2	2	1	1	1	1	3	2	2
FALSE	High	Master Protein	A0A088A2R3	Uncharacterized protein OS=Apis mellifera OX=7460 GN=LOC409586 PE=3 SV=1	PREDICTED: Apis mellifera NADH dehydrogenase [ubiquinone] 1 beta subcomplex subunit 9 (LOC409586), mRNA	0	FALSE	79.39	57	11	204	11	145	17.4	9.42	48.06	21.1	20	8.22	39.98	20.67	37.08	40.17	23.78	10.54	6.11	9.12	31.74	27.76	4.04	26.79	26.38	33	21.56	19.41	7	6	5	4	8	3	9	7	6	4	3	4	7	5
FALSE	High	Master Protein	A0A087ZVB3	Uncharacterized protein OS=Apis mellifera OX=7460 GN=LOC409602 PE=4 SV=1	PREDICTED: Apis mellifera circadian clock-controlled protein (LOC409602), mRNA	0	FALSE	38.235	31	7	34	7	245	28	5.12		7.96	11.12	7.71		1.85	13.79			3.16	3.92	3.58			0		3.53	3.58	5.62	3.55		3	5	3		1	6			2	2	3
FALSE	High	Master Protein	A0A088ARQ7	Uncharacterized protein OS=Apis mellifera OX=7460 GN=LOC409604 PE=4 SV=1	PREDICTED: Apis mellifera nostrin (LOC409604), transcript variant X1, mRNA	0	FALSE	23.33	5	3	3	3	1057	118.5	5.67	2.54													6.85							1													2
FALSE	High	Master Protein	H9KQA6	Uncharacterized protein OS=Apis mellifera OX=7460 GN=LOC409613 PE=3 SV=1		0	FALSE	143.784	76	12	388	12	193	21.8	6.93	69.11	37.72	38.11	112.06	58.18	44.52	68	70.73	27.65	68.92	14.32	9.14	14.03	43.28	20.02	65.58	58.65	69.72	51.52	85.53	8	10	8	12	8	7	8	9	7	9	3	3	4	6
FALSE	High	Master Protein	A0A088AFJ0	Uncharacterized protein OS=Apis mellifera OX=7460 GN=LOC409712 PE=3 SV=1	PREDICTED: Apis mellifera short/branched chain specific acyl-CoA dehydrogenase, mitochondrial (LOC409712), mRNA	0	FALSE	107.091	61	17	148	17	414	45.9	8.1	44.03	12.65		5.92	3.83	28.75	44.86	19.52	1.88		17.81	18.09	0	13.68		51.24	44.35	37.61	43.47	16.65	11	6		3	1	8	12	7	1		6	8	1	4
FALSE	High	Master Protein	A0A088A5E4	Uncharacterized protein OS=Apis mellifera OX=7460 GN=LOC409739 PE=4 SV=1	PREDICTED: Apis mellifera motile sperm domain-containing protein 2 (LOC409739), mRNA	0	FALSE	36.165	13	4	8	4	493	56.6	7.24						0						0		11.67			3.12									1						1		3
FALSE	High	Master Protein	A0A088AHQ3	Uncharacterized protein OS=Apis mellifera OX=7460 GN=LOC409743 PE=4 SV=1		0	FALSE	12.879	2	2	2	2	1648	182.9	6.67	3.3															3.56					1
FALSE	High	Master Protein	A0A088A3I9	Uncharacterized protein OS=Apis mellifera OX=7460 GN=LOC409755 PE=4 SV=1		0	FALSE	96.395	48	16	66	16	365	41.7	6.49	27.98	2.09		8.58	13.91	5.2		2.27	4.64	3.28	25.48	10.2	2.42	11.29	0	10.22		2.41	9.26	4.04	5	2		6	5	3		1	3	1	7	5	1	2
FALSE	High	Master Protein	A0A087ZWH3	Uncharacterized protein OS=Apis mellifera OX=7460 GN=LOC409765 PE=3 SV=1	PREDICTED: Apis mellifera actin-related protein 6 (LOC409765), transcript variant X1, mRNA	0.005	FALSE	3.885	4	1	1	1	391	45	5.14	1.87																				1
FALSE	High	Master Protein	A0A088AG46	Uncharacterized protein OS=Apis mellifera OX=7460 GN=LOC409776 PE=4 SV=1	PREDICTED: Apis mellifera bromodomain-containing protein 4 (LOC409776), mRNA	0.001	FALSE	4.578	5	2	2	2	540	60.3	9.07													0																				2
FALSE	High	Master Protein	A0A088AP79	Uncharacterized protein OS=Apis mellifera OX=7460 GN=LOC409790 PE=4 SV=1		0	FALSE	11.023	19	3	5	3	211	24.3	5.95							2.54							2.23													3							2
FALSE	High	Master Protein	A0A088AAV5	Uncharacterized protein OS=Apis mellifera OX=7460 GN=LOC409809 PE=3 SV=1		0	FALSE	205.457	61	24	163	24	534	57.9	6.64	74.56	20.26		14.74	6.51	33.37	32.27	5.61	5.68	1.96	24.53	9.97	6.44	116.96		61.95	9.03	11.1	35.76	4.55	15	6		8	2	10	10	2	2	1	8	4	4	15
FALSE	High	Master Protein	A0A088AW19	Uncharacterized protein OS=Apis mellifera OX=7460 GN=LOC409833 PE=4 SV=1	PREDICTED: Apis mellifera hemK methyltransferase family member 1 (LOC409833), mRNA	0	FALSE	22.973	19	5	10	5	349	39.7	6.96	0					0					2.11			3.85		5.97			0		2					1					2			1
FALSE	High	Master Protein	A0A087ZZS7	Uncharacterized protein OS=Apis mellifera OX=7460 GN=LOC409866 PE=4 SV=1	PREDICTED: Apis mellifera T-complex protein 1 subunit beta (LOC409809), mRNA	0	FALSE	43.244	21	6	22	5	403	46.2	6.24	22.13			3.15		7.17					2.49	0	2.11	4.65		18.7			3		4			1		1					1	1	1	3
FALSE	High	Master Protein	A0A087ZWE0	Uncharacterized protein OS=Apis mellifera OX=7460 GN=LOC409870 PE=4 SV=1	PREDICTED: Apis mellifera minor histocompatibility antigen H13 (LOC409870), mRNA	0	FALSE	17.175	12	4	31	4	373	41.6	6.79	4.08	3.99	1.69	0	1.72		5.36	0			3.85	1.63	0	7.59		1.81	9.58	8.51	0		1	2	2	2	1		2	2			1	1	1	3
FALSE	High	Master Protein	A0A088AG69	Uncharacterized protein OS=Apis mellifera OX=7460 GN=LOC409884 PE=4 SV=1	PREDICTED: Apis mellifera xylulose kinase (LOC409884), mRNA	0	FALSE	5.42	4	1	1	1	534	59.1	5.97																2.48
FALSE	High	Master Protein	A0A088AT91	Uncharacterized protein OS=Apis mellifera OX=7460 GN=LOC409886 PE=4 SV=1		0	FALSE	5.524	5	2	6	2	338	39.4	7.55				1.6				1.94	2.19			0		2.44										1				1	1			1		2
FALSE	High	Master Protein	A0A088AAY8	Uncharacterized protein OS=Apis mellifera OX=7460 GN=LOC409897 PE=4 SV=1		0	FALSE	67.856	17	15	41	13	1291	147.5	8.35	2.1		2.61		4.3	3.98		32.35						5.07		4.3		24.53	1.7	0	1		3		2	2		14						2
FALSE	High	Master Protein	A0A088AT65	Uncharacterized protein OS=Apis mellifera OX=7460 GN=LOC409905 PE=4 SV=1	PREDICTED: Apis mellifera 2-acylglycerol O-acyltransferase 1 (LOC409905), mRNA	0	FALSE	130.228	58	16	186	16	348	40.4	9.52	34.86	64.15	14.72	25.85	10.56	2.88	77.93		1.67		9.96	0	0	21.05	0	31.44	94.45	12.92	56.11		9	13	7	9	3	2	15		2		2	1	1	5
FALSE	High	Master Protein	A0A087ZQM4	Uncharacterized protein OS=Apis mellifera OX=7460 GN=LOC409927 PE=4 SV=1	PREDICTED: Apis mellifera putative pyridoxal-dependent decarboxylase domain-containing protein 2 (LOC409927), transcript variant X1, mRNA	0	FALSE	25.887	7	3	9	3	797	87.1	5.83	6.78					2.07			2.38							9.74				0	2					1			1
FALSE	High	Master Protein	A0A088A8I9	Uncharacterized protein OS=Apis mellifera OX=7460 GN=LOC409930 PE=4 SV=1		0	FALSE	85.91	64	6	457	6	121	14.3	9.79	62.31	52.26	53.48	47.77	52.62	42.98	58.78	65.59	61.08	33.03	76.24	59.69	115.55	165.12	20.5	50.49	42.38	58.23	40.43	46.27	4	5	5	5	6	4	5	6	5	4	3	4	6	4
FALSE	High	Master Protein	A0A088AGT8	Uncharacterized protein OS=Apis mellifera OX=7460 GN=LOC409950 PE=4 SV=1	PREDICTED: Apis mellifera fibrillin-1 (LOC409950), mRNA	0	FALSE	29.733	4	5	27	5	1625	180.2	5.35	0		0	0	9.62	0		0	1.77	2.16				7.93		0		2.55	5.01	2.04	1		1	1	4	1		2	2	3				2
FALSE	High	Master Protein	A0A088AVD8	Uncharacterized protein OS=Apis mellifera OX=7460 GN=LOC409986 PE=4 SV=1		0	FALSE	221.262	59	31	277	31	727	80.5	6.93	64.44	21.49	5.24	17.28	5.32	28.41	103.02	6.92		1.69	37	21.84	20.85	75.83	0	103.76	73.37	49.8	83.33	10.97	12	9	5	11	2	9	23	3		2	11	9	11	16
FALSE	High	Master Protein	A0A088A820	Uncharacterized protein OS=Apis mellifera OX=7460 GN=LOC410022 PE=3 SV=1	PREDICTED: Apis mellifera mitochondrial-processing peptidase subunit beta (LOC410022), mRNA	0	FALSE	331.829	70	25	858	25	477	53.3	5.53	160.4	90.29	153.92	93.74	146.3	126.49	176.91	163.38	104.47	114.77	90.46	144.22	169.04	107.29	38.18	151.83	88.75	167.89	107.87	85.6	17	16	21	17	17	18	19	19	18	18	10	14	15	15
FALSE	High	Master Protein	A0A088AS03	Uncharacterized protein OS=Apis mellifera OX=7460 GN=LOC410040 PE=4 SV=1		0	FALSE	10.278	4	1	2	1	248	28.4	9.88														4.96																				1
FALSE	High	Master Protein	A0A088A464	Uncharacterized protein OS=Apis mellifera OX=7460 GN=LOC410054 PE=4 SV=1		0	FALSE	21.977	8	3	4	3	529	58.4	5.21	4.38											0		2.27							1											1		1
FALSE	High	Master Protein	A0A087ZPT8	Uncharacterized protein OS=Apis mellifera OX=7460 GN=LOC410071 PE=3 SV=1	PREDICTED: Apis mellifera glycerol-3-phosphate phosphatase (LOC410071), mRNA	0	FALSE	18.415	29	5	8	5	307	34.1	5.27													8.42	2.81																			4	1
FALSE	High	Master Protein	A0A088AJ02	Uncharacterized protein OS=Apis mellifera OX=7460 GN=LOC410114 PE=4 SV=1	PREDICTED: Apis mellifera solute carrier family 23 member 1 (LOC410114), transcript variant X1, mRNA	0	FALSE	31.657	11	6	10	6	580	63.7	7.55			3.33														24.59						2
FALSE	High	Master Protein	A0A088A3M1	Uncharacterized protein OS=Apis mellifera OX=7460 GN=LOC410115 PE=3 SV=1		0	FALSE	96.845	46	12	49	12	417	46.8	5.99	41.79	3.6		1.64	2.4	3.25	9.29		2.05			1.76	0	36.49		20.41	7.04	7.57	3.7		7	1		1	1	1	3		1			1	1	5
FALSE	High	Master Protein	A0A088AB41	Uncharacterized protein OS=Apis mellifera OX=7460 GN=LOC410165 PE=4 SV=1	PREDICTED: Apis mellifera RNA-binding protein Nova-1 (LOC410165), transcript variant X2, misc_RNA	0	FALSE	88.272	25	10	73	10	514	54.2	7.74	51.73			11.79	2.1	13.27	5.93	5.66	2.1	7.4	1.63	2.29	1.63	17.71		28.48	12.56	11.96	12.03	4.71	8			4	1	4	2	3	1	3	2	1	1	6
FALSE	High	Master Protein	A0A088ABF5	Uncharacterized protein OS=Apis mellifera OX=7460 GN=LOC410189 PE=4 SV=1	PREDICTED: Apis mellifera 5'-nucleotidase domain-containing protein 3 (LOC410189), transcript variant X1, mRNA	0	FALSE	8.288	5	2	2	2	528	62.3	8.21	0															3.48					1
FALSE	High	Master Protein	A0A088AHR3	Uncharacterized protein OS=Apis mellifera OX=7460 GN=LOC410218 PE=4 SV=1	PREDICTED: Apis mellifera probable signal peptidase complex subunit 2 (LOC410218), mRNA	0	FALSE	48.061	34	5	93	5	192	21.3	6.18	29.69	19.36	11.16	7.24	20.13	24.07	23.6	10.08	5.55	1.93				13.15		33.27	22.57	26.25	18.3	7.55	3	3	3	3	2	4	5	2	2	1				1
FALSE	High	Master Protein	A0A088AWB2	Uncharacterized protein OS=Apis mellifera OX=7460 GN=LOC410244 PE=4 SV=1	PREDICTED: Apis mellifera uncharacterized LOC410244 (LOC410244), mRNA	0	FALSE	10.855	10	1	10	1	152	17.2	7.5		5.13	3.03	2.57			5.2	2.49					5.08									1	1	1			1	1					1
FALSE	High	Master Protein	A0A087ZVR1	Uncharacterized protein OS=Apis mellifera OX=7460 GN=LOC410247 PE=4 SV=1		0	FALSE	8.499	5	2	2	2	622	69.3	7.15													6.06																				2
FALSE	High	Master Protein	A0A088A7D1	Uncharacterized protein OS=Apis mellifera OX=7460 GN=LOC410306 PE=3 SV=1	PREDICTED: Apis mellifera ADP-ribosylation factor 2 (LOC410306), mRNA	0	FALSE	105.481	77	12	189	11	180	20.4	7.37	24.96	20.14	31.56	71.56	44.38	10.3	13.72	19.75	23.92	14.66	18.46	18.36	18.89	27.51	8.6	18.82	12.78	27.56	22.17	36.96	5	7	9	12	9	2	4	6	4	5	4	3	5	5
FALSE	High	Master Protein	A0A088A1M5	Uncharacterized protein OS=Apis mellifera OX=7460 GN=LOC410325 PE=3 SV=1	PREDICTED: Apis mellifera trifunctional enzyme subunit alpha, mitochondrial (LOC410325), mRNA	0	FALSE	367.809	54	30	970	30	764	84.3	9.01	237.68	169.96	132.24	80.01	144.35	149.38	151.61	157.35	101.27	50.65	86.41	39.02	46.96	167.35	35.4	211.25	175.5	226.55	164	108.93	23	26	24	21	22	20	22	24	22	15	13	11	14	14
FALSE	High	Master Protein	A0A088AGR8	Uncharacterized protein OS=Apis mellifera OX=7460 GN=LOC410429 PE=4 SV=1		0	FALSE	5.507	6	1	8	1	244	26.9	5.83	3.04	2.55	2.37	1.73					2.09							2.44	2.85				1	1	1	1					1
FALSE	High	Master Protein	A0A088AMA7	Uncharacterized protein OS=Apis mellifera OX=7460 GN=LOC410539 PE=3 SV=1		0	FALSE	90.263	24	12	105	12	593	65.8	7.93	47.15		6.94	2.18	17.77	17.87		27.82	7.56	5.4	3.42			8.67	4.24	31.89		61.79	9.86	23.9	9		3	2	5	4		8	3	3	1			3
FALSE	High	Master Protein	A0A087ZS35	Uncharacterized protein OS=Apis mellifera OX=7460 GN=LOC410554 PE=4 SV=1		0	FALSE	10.041	10	4	10	4	559	61.3	8.46	3.03				2.21	0		0						0		2.13		4.7			1				2	1		1						1
FALSE	High	Master Protein	A0A088AFI2	Uncharacterized protein OS=Apis mellifera OX=7460 GN=LOC410595 PE=4 SV=1	PREDICTED: Apis mellifera protein RMD5 homolog A (LOC410595), mRNA	0.001	FALSE	4.731	4	1	1	1	392	44.4	6.65														2.47																				1
FALSE	High	Master Protein	A0A088AF49	Uncharacterized protein OS=Apis mellifera OX=7460 GN=LOC410617 PE=3 SV=1	PREDICTED: Apis mellifera cytochrome c oxidase assembly protein COX15 homolog (LOC410617), transcript variant X1, mRNA	0	FALSE	19.258	9	3	28	3	431	48.9	9.88	4.93	0	1.94		4.87	1.61	3.76	2.32	0	1.71			2.11	4.26	0	3.81	3.68	6.84		3.46	2	1	1		1	1	1	1	1	1			1	1
FALSE	High	Master Protein	A0A088AGJ8	Uncharacterized protein OS=Apis mellifera OX=7460 GN=LOC410620 PE=3 SV=1		0	FALSE	296.334	58	29	642	11	640	70.3	5.82	173.79	62.39	23.44	72.85	52.99	93.52	83.34	41.38	39.64	41.86	113.89	106.45	77.46	281.07	9.16	169.49	62.27	72.83	164.09	37.35	19	14	6	13	10	18	18	10	8	11	14	14	15	19
FALSE	High	Master Protein	A0A088A2L8	Uncharacterized protein OS=Apis mellifera OX=7460 GN=LOC410683 PE=3 SV=1	PREDICTED: Apis mellifera sodium-coupled monocarboxylate transporter 2 (LOC410683), transcript variant X2, mRNA	0	FALSE	42.626	16	7	38	7	595	65.8	7.78	13.81		2.72	2.34	2.16	11.82		9.06		5.61				7.24		9.69		25.3	10.23	8.79	3		2	1	1	3		3		2				2
FALSE	High	Master Protein	A0A087ZTT0	Uncharacterized protein OS=Apis mellifera OX=7460 GN=LOC410690 PE=4 SV=1	PREDICTED: Apis mellifera haloacid dehalogenase-like hydrolase domain-containing 5 (LOC410690), mRNA	0	FALSE	33.397	17	5	20	5	394	44.2	7.77	7.87	4.22		0		5.05	1.79				7.5	2.17	4.9	2.45		5.84	2.31		3.79		3	2		1		2	1				3	1	2	1
FALSE	High	Master Protein	A0A088AUT9	Uncharacterized protein OS=Apis mellifera OX=7460 GN=LOC410793 PE=4 SV=1		0.002	FALSE	4.347	0	1	1	1	4361	499.9	6.67	2.42																				1
FALSE	High	Master Protein	A0A088AUS1	Uncharacterized protein OS=Apis mellifera OX=7460 GN=LOC410812 PE=4 SV=1		0	FALSE	44.458	45	6	44	5	194	22.1	8.12	3.1	5.66	4.93	4.92	5.58	3.26	8.05	2.36		2.98	2.27	2.64	2.17	15.32	1.63	5.7	13.98	15.04	11.5	9.1	1	2	2	1	2	1	3	1		1	1	1	1	4
FALSE	High	Master Protein	A0A088AUL6	Uncharacterized protein OS=Apis mellifera OX=7460 GN=LOC410816 PE=4 SV=1	PREDICTED: Apis mellifera zinc transporter 9 (LOC410816), transcript variant X1, mRNA	0	FALSE	6.439	5	2	5	2	594	67.7	8.63	2.39	0						2.05								0					1	1						2
FALSE	High	Master Protein	A0A088AVB0	Uncharacterized protein OS=Apis mellifera OX=7460 GN=LOC410849 PE=3 SV=1		0.009	FALSE	2.896	3	1	1	1	629	71.7	6.13																3.02
FALSE	High	Master Protein	A0A088AE72	Uncharacterized protein OS=Apis mellifera OX=7460 GN=LOC410867 PE=4 SV=1		0	FALSE	15.2	1	1	1	1	1615	175.9	7.17														3.82																				1
FALSE	High	Master Protein	A0A088ABW5	Uncharacterized protein OS=Apis mellifera OX=7460 GN=LOC410883 PE=4 SV=1	PREDICTED: Apis mellifera charged multivesicular body protein 6 (LOC410883), mRNA	0	FALSE	6.189	15	2	3	2	209	24.4	5.53				0																2.5				2
FALSE	High	Master Protein	A0A088A4D7	Uncharacterized protein OS=Apis mellifera OX=7460 GN=LOC410906 PE=4 SV=1		0	FALSE	9.031	8	2	13	1	369	43.5	8.72						1.91	2.68		2.46		5.86	5.76	2.52	2.76		2.14	2.75	2.55								1	1		1		1	1	1	1
FALSE	High	Master Protein	A0A087ZR22	Uncharacterized protein OS=Apis mellifera OX=7460 GN=LOC410915 PE=3 SV=1	PREDICTED: Apis mellifera aquaporin AQPAn.G (LOC410915), transcript variant X2, mRNA	0	FALSE	39.732	25	4	60	4	264	27	8.18	2.96	6.46	24.15		14.24	5.33	21.87	5.36	2.64	2.5	9.64	5.14	8.37	17.61	2.08	9.57	10.18	6.46	11.72	2.75	1	1	2		2	1	3	1	1	1	1	1	1	2
FALSE	High	Master Protein	A0A088A6U8	Uncharacterized protein OS=Apis mellifera OX=7460 GN=LOC410918 PE=4 SV=1		0	FALSE	13.777	6	3	4	3	538	58.7	6.98	5.59															2					2
FALSE	High	Master Protein	A0A088AVJ1	Uncharacterized protein OS=Apis mellifera OX=7460 GN=LOC410952 PE=3 SV=1	PREDICTED: Apis mellifera dehydrogenase/reductase SDR family protein 7-like (LOC410952), transcript variant X2, mRNA	0	FALSE	15.656	12	3	10	3	317	36.1	9.28					0		0	0						3.32			4.21	3.85	1.93						1		2	1						1
FALSE	High	Master Protein	A0A087ZZ43	Uncharacterized protein OS=Apis mellifera OX=7460 GN=LOC411011 PE=4 SV=1		0	FALSE	30.506	23	6	27	5	381	44.2	7.88	1.66				1.73	1.85	2.68		2.46		8.51	8.1	4.76	9.93		2.14	5.39	7.73	2.41		1				2	1	3		1		2	2	2	3
FALSE	High	Master Protein	A0A087ZZU4	Uncharacterized protein OS=Apis mellifera OX=7460 GN=LOC411100 PE=4 SV=1		0	FALSE	112.861	40	14	66	14	547	59.9	6.87	80.15				2.32	16.15		12.35		2.64		0		12.53		43.95		0	12.06	0	10				1	4		4		1		1		4
FALSE	High	Master Protein	A0A088A0E6	Uncharacterized protein OS=Apis mellifera OX=7460 GN=LOC411105 PE=4 SV=1		0.008	FALSE	3.077	3	1	1	1	537	59.6	8.53	0																				1
FALSE	High	Master Protein	A0A087ZU42	Uncharacterized protein OS=Apis mellifera OX=7460 GN=LOC411141 PE=4 SV=1	PREDICTED: Apis mellifera ATP-dependent Clp protease ATP-binding subunit clpX-like, mitochondrial (LOC411141), transcript variant X1, mRNA	0	FALSE	41.236	20	8	52	8	586	64.4	8.19	11.76	5.83	0	1.86	4.52	13.05	4.74	7.27	3.42	1.62	2.47			3.96		10.67	1.82	14.52	7.87	3.78	4	3	2	3	2	3	3	3	3	2	1			1
FALSE	High	Master Protein	A0A088AS59	Uncharacterized protein OS=Apis mellifera OX=7460 GN=LOC411250 PE=3 SV=1	PREDICTED: Apis mellifera ATP-dependent RNA helicase p62-like (LOC102655407), transcript variant X2, mRNA	0	FALSE	46.792	18	11	59	5	728	82.2	9.42	13.71	3.53	1.79	7.81	6.09	5.17	4.38	7.33		9.96	0	0	0	16.7		14.73	7.62	13.41	6	7.31	5	1	1	2	3	2	2	3		5	2	1	1	5
FALSE	High	Master Protein	A0A088ASZ7	Uncharacterized protein OS=Apis mellifera OX=7460 GN=LOC411285 PE=4 SV=1	PREDICTED: Apis mellifera muscle LIM protein Mlp84B (LOC411285), transcript variant X3, mRNA	0	FALSE	137.939	48	15	172	15	493	53.2	8.18	7.02	56.49		34.44	81.03	28.2	42.11		0	14.41	10.29	36	1.71	38.5	0		10.7	59.51	33.1	5.2	2	12		8	12	6	10		1	5	3	4	1	10
FALSE	High	Master Protein	A0A088AP17	Uncharacterized protein OS=Apis mellifera OX=7460 GN=LOC411295 PE=4 SV=1	PREDICTED: Apis mellifera V-type proton ATPase subunit D 1 (LOC411295), mRNA	0	FALSE	135.571	60	15	444	15	245	27.4	9.48	89.94	65.64	50.09	50.14	44.33	57.51	62.95	54.34	28.66	34.82	58.95	61.56	20.17	230.95	20.42	68.83	53.21	74.3	52.45	39.24	11	11	9	9	9	9	10	9	7	7	6	9	5	7
FALSE	High	Master Protein	A0A087ZUS6	Uncharacterized protein OS=Apis mellifera OX=7460 GN=LOC411317 PE=4 SV=1		0	FALSE	24.822	18	6	14	6	424	45.8	5.5								0					10.82															4					5
FALSE	High	Master Protein	A0A088AHY7	Uncharacterized protein OS=Apis mellifera OX=7460 GN=LOC411366 PE=4 SV=1		0	FALSE	9.43	8	1	3	1	181	20.1	7.23														6.02																				1
FALSE	High	Master Protein	A0A088AD26	Uncharacterized protein OS=Apis mellifera OX=7460 GN=LOC411378 PE=4 SV=1	PREDICTED: Apis mellifera prostaglandin reductase 1 (LOC411378), mRNA	0	FALSE	68.859	50	12	87	12	337	37.6	8.84	22.52	19.99	4.24	29.75	25.47		12.92	2.77	15.44	7.19	6.5	10.77	12.27	7.99		14.35	10.38		16.88	4.53	5	6	2	11	8		4	2	5	3	4	4	6	4
FALSE	High	Master Protein	A0A088A7W9	Uncharacterized protein OS=Apis mellifera OX=7460 GN=LOC411474 PE=4 SV=1		0	FALSE	9.499	1	2	2	2	1906	219.7	6.79														3.07						0														1
FALSE	High	Master Protein	A0A087ZX94	Uncharacterized protein OS=Apis mellifera OX=7460 GN=LOC411483 PE=4 SV=1		0	FALSE	30.931	7	4	31	4	768	86.9	6.7	13.81	2.28	0		0	0	2.24		0							8.45	3.93	4.49	5.25		4	1	1		2	3	3		1
FALSE	High	Master Protein	A0A088ALS8	Uncharacterized protein OS=Apis mellifera OX=7460 GN=LOC411488 PE=4 SV=1	PREDICTED: Apis mellifera glycogen debranching enzyme (LOC411488), mRNA	0	FALSE	8.837	1	1	1	1	1556	177.4	6.07	2.88																				1
FALSE	High	Master Protein	A0A088AN97	Uncharacterized protein OS=Apis mellifera OX=7460 GN=LOC411533 PE=4 SV=1		0	FALSE	46.586	27	10	33	10	365	42.9	7.34	6.59	2.31		0		2.58	8.44				1.69	14.1		18.9		2.4	4.43		4.82		3	2		1		1	6				1	5		4
FALSE	High	Master Protein	A0A087ZQI6	Uncharacterized protein OS=Apis mellifera OX=7460 GN=LOC411573 PE=3 SV=1	PREDICTED: Apis mellifera cell cycle control protein 50A (LOC411573), transcript variant X1, mRNA	0	FALSE	17.926	12	3	13	3	361	40.4	8.43	5.64					2.1	4							4.52		2.04	4.6	5.01	4.1		2					1	2							1
FALSE	High	Master Protein	A0A088A7Y3	Uncharacterized protein OS=Apis mellifera OX=7460 GN=LOC411704 PE=4 SV=1		0	FALSE	19.664	13	4	18	3	356	40.3	6.43		0	0				4.92		2.46		5.86	5.76	2.52	6.03		2.14	4.92	2.55				1	1				2		1		1	1	1	3
FALSE	High	Master Protein	A0A088ADG3	Uncharacterized protein OS=Apis mellifera OX=7460 GN=LOC411730 PE=4 SV=1	PREDICTED: Apis mellifera mannosyl-oligosaccharide glucosidase GCS1 (LOC411730), mRNA	0	FALSE	27.293	11	6	14	6	809	93.7	8.92	4.81					0	1.79		1.73				1.73	3.69		2.4	0	0	3.16		2					1	3		1				1	1
FALSE	High	Master Protein	A0A087ZY47	Uncharacterized protein OS=Apis mellifera OX=7460 GN=LOC411732 PE=4 SV=1	PREDICTED: Apis mellifera trimeric intracellular cation channel type 1B.1 (LOC411732), mRNA	0	FALSE	7.929	9	2	11	2	275	30.7	8.87	1.73			0	1.28		0		0							1.74		0			1			1	2		1		1
FALSE	High	Master Protein	A0A088A108	Uncharacterized protein OS=Apis mellifera OX=7460 GN=LOC411863 PE=4 SV=1	PREDICTED: Apis mellifera dehydrogenase/reductase SDR family member 7 (LOC411863), mRNA	0	FALSE	56.565	38	8	61	8	329	37.1	8.62	9.93	13.57	2.22		8.12	3.55	26.13				5.45	10.88	5.29	6.48		10.89	26.02	10.05	10.56	3.14	2	3	2		2	1	6				2	3	3	3
FALSE	High	Master Protein	A0A087ZYG3	Uncharacterized protein OS=Apis mellifera OX=7460 GN=LOC411889 PE=4 SV=1	PREDICTED: Apis mellifera putative serine protease K12H4.7 (LOC411889), transcript variant X2, mRNA	0	FALSE	28.998	20	6	21	6	494	56.4	8.03	7.55	1.78				2.86	2.44						3.13			7.2	0	4.55	2.26	0	4	2				1	2						1
FALSE	High	Master Protein	A0A088AQ94	Uncharacterized protein OS=Apis mellifera OX=7460 GN=LOC411896 PE=4 SV=1		0	FALSE	6.864	3	2	2	2	765	87.1	6.35	4.52																				2
FALSE	High	Master Protein	A0A087ZV93	Uncharacterized protein OS=Apis mellifera OX=7460 GN=LOC411923 PE=3 SV=1	PREDICTED: Apis mellifera alanine--tRNA ligase, cytoplasmic (LOC411923), transcript variant X1, mRNA	0	FALSE	59.917	12	12	44	11	1194	135.1	6.83	32.09	1.81		1.83	0	6.28	8.92	0	1.78		0	3.67		4.26		9.34		4.68	8.22		8	2		1	1	2	4	2	1		1	3		2
FALSE	High	Master Protein	A0A087ZXY1	Uncharacterized protein OS=Apis mellifera OX=7460 GN=LOC411936 PE=4 SV=1		0.006	FALSE	3.465	6	1	1	1	157	17.7	4.88	2.13																				1
FALSE	High	Master Protein	A0A088AJJ6	Uncharacterized protein OS=Apis mellifera OX=7460 GN=LOC411989 PE=3 SV=1	PREDICTED: Apis mellifera eukaryotic initiation factor 4A-I (LOC411989), transcript variant X1, mRNA	0	FALSE	156.535	50	20	163	18	423	48.1	5.49	78.94	7.13	7.16	28.65	3.04	34.38	12.42	11.89	34.14	5.95	7.93	12.81	31.2	62.04		78.56	18.38	8.7	24.04	5.9	14	3	4	8	1	9	3	4	9	3	3	4	7	8
FALSE	High	Master Protein	A0A088AQ15	Uncharacterized protein OS=Apis mellifera OX=7460 GN=LOC412111 PE=4 SV=1	PREDICTED: Apis mellifera vigilin (LOC412111), transcript variant X1, mRNA	0	FALSE	83.178	16	16	32	16	1233	138.6	6.9	19.08			0			4.82				6.42	0		28.7		5.93	2.21		4.06	2.09	5			2			3				3	1		9
FALSE	High	Master Protein	A0A088A6E8	Uncharacterized protein OS=Apis mellifera OX=7460 GN=LOC412159 PE=4 SV=1		0	FALSE	7.648	2	1	1	1	836	98.9	6.07														3.27																				1
[truncated: 915 more rows]
[truncated: 37 more columns]
